# Supplementary material
Source: publisher site journal article supplement (https://www.dovepress.com/article/215528)
Supplement: Supplementary file 1 [file get_supplementary_file.php]

## Collection Sheet for control individuals.

| Research ID | Source | Age | Gender | Nationality | Ethnic Background        | Physical Exam | BP     | Heart Rate | Smoking | Fasting |     |
|-------------|--------|-----|--------|-------------|--------------------------|---------------|--------|------------|---------|---------|-----|
|             |        |     |        |             |                          | Height        | Weight |            |         |         |     |
| JK-1        | clinic | 50  | M      | Pakistani   | Indian                   | 177           | 69     | 120/80     | 85      | No      |     |
| JK-2        | clinic | 40  | M      | Egyptian    | Egyptian                 | 175           | 70     |            |         | No      |     |
| JK-3        | clinic | 46  | M      | Netherland  | Somali                   | 173           | 91.6   | 110/90     | 85      | No      |     |
| JK-4        | clinic | 36  | M      | Saudi       | Saudi                    | 171           | 89.9   | 110/83     | 83      | No      |     |
| JK-5        | clinic | 44  | F      | Egyptian    | Egyptian                 | 164           | 66     | 90/50      | 80      | No      |     |
| JK-6        | clinic | 35  | F      | Pilipino    | Pilipino                 | 151           | 54     | 110/81     | 79      | No      |     |
| JK-7        | clinic | 36  | F      | Pilipino    | Pilipino                 | 151           | 54.3   | 100/70     | 82      | No      |     |
| JK-8        | clinic | 36  | F      | Saudi       | Saudi                    | 156           | 47.5   | 92/72      | 80      | No      |     |
| Jk-10       | clinic | 40  | F      | Saudi       | li /Indian/Turkish/Egypt | 152           | 56.7   | 110/90     | 80      | Yes     | No  |
| Jk-11       | clinic | 55  | F      | Saudi       | Saudi                    | 168           | 59.5   | 110/78     | 70      | No      | No  |
| Jk-12       | clinic |     | F      | Saudi       | Saudi                    | 165           | 83     | 100/68     | 80      | No      | No  |
| Jk-13       | clinic | 40  | F      | Saudi       |                          | 163           | 77.5   | 90/76      | 88      | No      | No  |
| Jk-14       | clinic | 39  | F      | Saudi       |                          | 156           | 69.8   | 122/78     | 96      | No      | No  |
| Jk-15       | clinic | 45  | F      | Egyptian    | Egyptian                 | 168           | 134.1  | 140/100    | 72      | No      | No  |
| Jk-16       | clinic | 40  | F      | Saudi       |                          | 163           | 134.1  | 140/100    | 75      | No      | No  |
| Jk-17       | clinic | 46  | F      | Saudi       |                          | 156           | 84.3   | 118/90     | 100     | Yes     |     |
| Jk-18       | clinic | 53  | F      | Pilipino    | Asian                    | 160           | 52.3   | 130/80     | 56      | No      |     |
| Jk-19       | clinic | 42  | F      | Pilipino    |                          | 153           | 72.9   | 196/100    | 66      | No      |     |
| Jk-20       | clinic | 35  | F      | Pilipino    | Asian                    | 160           | 56.5   | 110/80     | 80      | No      |     |
| Jk-21       | clinic | 57  | F      | Indian      |                          | 146           | 47.5   | 110/90     | 69      | No      |     |
| Jk-23       | clinic | 80  | F      | Ethiopian   |                          | 160           | 84.7   | 134/98     | 72      | No      |     |
| Jk-24       | clinic | 60  | F      | Pilipino    |                          | 160           | 72.3   | 158/90     | 60      |         |     |
| Jk-25       | clinic | 47  | M      | Saudi       |                          | 156           | 62     | 140/82     | 66      |         |     |
| Jk-26       | clinic | 40  | F      | Saudi       |                          | 155           | 75     | 106/82     | 60      | No      | No  |
| Jk-27       | clinic | 37  | F      | Saudi       |                          | 154           | 53     | 116/76     | 76      | No      | No  |
| Jk-28       | clinic | 46  | F      | Saudi       | Egyptian                 | 160           | 63     | 118/84     | 68      | Yes     | No  |
| Jk-29       | clinic | 36  | F      | Saudi       |                          | 167           | 79     | 110/66     | 80      | No      | Yes |
| Jk-30       | clinic | 44  | M      | Saudi       |                          | 201           | 116    | 122/84     | 62      | No      | No  |

Table 1: Collection Sheet for T2D patients.

| Research ID | Source         | Age | Gender | Nationality | Ethnic Background | Physical Exam |        | BP      | Heart Rate | Peripheral Neuropathy |
|-------------|----------------|-----|--------|-------------|-------------------|---------------|--------|---------|------------|-----------------------|
|             |                |     |        |             |                   | Height        | Weight |         |            |                       |
| 14          | Lecture        | 24  | Female | Yamani      | Yamani            | 150           | 57     | 156/86  | 65         | No                    |
| 15          | clinic         | 53  | Female | Yamani      | Yamani            | 156.3         | 74.3   | 141/83  | 100        | Yes                   |
| 16          | lectuer        | 58  | Female | Saudi       | Saudi             | 151           | 80     | 169/71  | 70         | Yes                   |
| 17          | lectuer        | 50  | Female | Yamani      | Yamani            | 143           | 85     | 154/73  | 75         | Yes                   |
| 22          | clinic         | 61  | Female | Saudi       | Saudi             | 148           |        |         |            | Yes                   |
| 23          | clinic         | 32  | Male   | Saudi       | Saudi             | 165           | 51.71  |         |            | Yes                   |
| 24          | clinic         | 56  | Female | Yamani      | Yamani            | 152           | 82     | 117/60  | 70         |                       |
| 25          | clinic         | 48  | Male   | Turkaish    | Turkaish          | 165           | 113.5  | 141/87  | 68         |                       |
| 26          | clinic         | 63  | Female | Saudi       | Palestinian       | 144           | 73     | 179/71  | 70         |                       |
| 27          | clinic         | 40  | Female | Eritrean    | Eritrean          | 147           | 62.7   | 134/07  | 75         |                       |
| 28          | clinic         | 74  | Male   | Yamani      | Yamani            | 162           | 67.3   | 130/71  | 60         |                       |
| 29          | clinic         | 47  | Female | Saudi       | Saudi             | 154           | 55.6   | 127/59  | 53         |                       |
| 30          | clinic         | 56  | Female | Pakistani   | Pakistani         | 162           | 95.4   | 134/82  | 85         |                       |
| 31          | clinic         | 48  | Male   | Palestinian | Palestinian       | 178           | 136    | 146/76  | 63         |                       |
| 32          | clinic         | 59  | Female | Saudi       | Saudi             | 144           | 57     | 154/68  | 67         |                       |
| 33          | clinic         | 49  | Female | Saudi       | Saudi             | 168           | 82.6   | 147/68  | 88         |                       |
| 34          | clinic         | 55  | Male   | Saudi       | Saudi             | 166           | 66.6   | 114/67  | 98         | No                    |
| 35          | clinic         | 73  | Female | Yamani      | Yamani            | 140           | 69     |         |            | No                    |
| 36          | clinic         | 41  | Female | Saudi       | Saudi             | 160           | 64     | 107/66  | 82         | No                    |
| 37          | clinic         | 67  | Female | Saudi       | Saudi             | 144           | 110    |         |            |                       |
| 38          | clinic         | 62  | Female | Ethiopian   | Ethiopian         | 142           | 83     |         |            |                       |
| 39          | clinic         | 64  | Male   | Saudi       | Saudi             | 153           | 72.7   | 158/72  | 108        | No                    |
| 40          | clinic         | 45  | Female | Yamani      | Yamani            | 168           | 74.3   | 121/65  | 78         | No                    |
| 42          | clinic         | 45  | Female | Saudi       | Saudi             | 165           | 79.7   | 137/77  | 88         | No                    |
| 43          | clinic         | 56  | Female | Palestinian | Palestinian       | 145           | 68.6   | 95/56   | 76         |                       |
| 44          | clinic         | 57  | Female | Yamani      | Yamani            |               |        | 120/80  |            |                       |
| 45          | diabetic socie | 52  | Female | Somalian    | Somalian          |               |        | 160/100 |            |                       |
| 46          | clinic         | 52  | Male   | Yamani      | Yamani            | 158           | 61     | 94/55   |            |                       |
| 47          | clinic         | 47  | Female | Sudanese    | Sudanese          | 160           | 80     | 138/64  |            |                       |
| 48          | clinic         | 43  | Female | Sudanese    | Sudanese          | 144           | 57     |         |            |                       |
| 49          | clinic         | 75  | Male   | Palestinian | Palestinian       | 172           | 95     | 179/85  | 76         |                       |
| 50          | clinic         | 55  | Female | Palestinian | Palestinian       |               |        | 192/69  | 67         |                       |
| 51          | clinic         | 60  | Female | Sudanese    | Sudanese          | 181           | 100    | 118/46  |            |                       |
| 52          | clinic         | 33  | Female | Yamani      | Yamani            | 145           | 54.2   | 107/61  | 86         |                       |

| Medical History                                                 | Medications                                                                          |
|-----------------------------------------------------------------|--------------------------------------------------------------------------------------|
|                                                                 | Diabetes                                                                             |
| DM1 for 9 yrs, HTN, Dyslipidemia, Migrain                       | Actrapid 6,4,4 units, Lantus 26 units midnight, Glucophage 500 my TID                |
| DM2 for 18 yrs, HTN, Dyslipidemia                               | NPH 20u; 14npm, Regular 8u with each meal                                            |
| DM2 for 5 yrs, HTN, Dyslipidemia                                | Mixed insulin 20u -18u, Glucophage 500 mg TID                                        |
| DM2 for 5 yrs , HTN, Asthma, GERD, Hypothyroidism               | Glucophage 500 mg BID, Diatab 10mg OD                                                |
| DM2 for 15 yrs, HTN, Renal impairment                           | Insulin Mixtard -30 u, Glucophage lg OD                                              |
| DM1 for 19 yrs                                                  | Insulin Lantus 30-35 u, Insulin NovoRapid 19 u with each meal                        |
| DM2 for 20 yrs , HTN, Dyslipidemia, GERD, Palpitation           | Glucophage 1g BID , Insulin Mixtard 40u am ; 30 u pm                                 |
| DM2 for 10 yrs , HTN, Dyslipidemia , Nephrolithasis             | Glucophage 500 mg BID , Doanil 5mg BID                                               |
| DM, HTN, Dyslipidemia,                                          | Glicophage 500 mg, Dimicon MR 60                                                     |
| DM2 for 13yrs , Ashmah , Allergic rhinitis                      | Insulin Mixtard "irregular dosing"                                                   |
| DM2 , HTN , Dyslipidemia                                        | Daonil 10 mg BID , Glucophage lg BID , Lipitor 10mg OD , Capotine 50mg BID, Actos 15 |
| DM , Panhypopituitarism                                         | Metaformin 500mg OD , Caltrate 600mg BID                                             |
| DM , HTN , Dyslipidemia                                         | Glucophage 500mg TID                                                                 |
| DM , HTN                                                        | Diamicrone BID, Metaformin BID ,                                                     |
| DM                                                              | Glucophage                                                                           |
| DM , HTN, Hypothyroidism                                        | Mixtard                                                                              |
| DM2                                                             | Mixtard                                                                              |
| DM2                                                             |                                                                                      |
| DM2, HTN, Stroke, Diabetic foot                                 | Lantus, Novorapid                                                                    |
| DM , Hyperlipidemia                                             |                                                                                      |
| DM                                                              |                                                                                      |
| DM2 , Diabetic retinopathy, HTN, Femoral fracture, Dyslipidemia | Insulin mixtard, Glucophage                                                          |
| DM, HTN, Bilateral renal stone                                  | Amylor , Glucophage                                                                  |
| DM2                                                             | Zocor, Lantus                                                                        |
| DM2, HTN, Hyperlipidemia                                        | Mixtard                                                                              |
| DM2                                                             | Glucophage                                                                           |
| DM                                                              |                                                                                      |
| DM2, Hyperlipidemia                                             | Amaryl, Glucophage, Lantus                                                           |
| DM2, HTN, Hyperlipidemia                                        |                                                                                      |
| DM2                                                             |                                                                                      |
| DM2, HTN                                                        | Lantus, Doanil                                                                       |
| DM2, HTN                                                        | Diatab                                                                               |
| DM2, HTN, Hyperlipidemia                                        |                                                                                      |
| DM2                                                             | Lantus, Mixtard                                                                      |

|                                                                                             | Smoking | Labs |       |
|---------------------------------------------------------------------------------------------|---------|------|-------|
| Others                                                                                      |         | Hb   | HbA1c |
| Simvastatin 40mg OD, Capoten 95mg TID, Amlor 5mg OD, Thyroxine 25mg OD, Topamax 150 mg BID. | No      | 9.4  | 8.50% |
| Concor 9.5 mg OD, Simvastatin 40mg OD, ASA 81mg OD                                          | No      | 12.6 | 9.3   |
| Coversyl 10mg OD . Amlodipine 9.5mg OD, ASA 81mg, Tegretol                                  | No      | 12   | 11    |
| Capoten 25mg BID . Thyroxine, Seretide 50 mg II puffs BID . Ventoein PRN .                  | No      | 11.8 | 5.9   |
| ASA 81mg OD, Glutamine, Ferrobiotron, MVT, Amlodipine 5mg BID                               | No      | 8    | 7.9   |
|                                                                                             | No      | 14.6 | 8.5   |
| Atenolol 50mg OD, Simvastatine 20 mg OD, Losac 20 mg OD                                     | No      | 12.4 | 10.8  |
| Lipitor OD, Atacand plus                                                                    | No      |      | 7.4   |
| One alfa, Capoten 25 mg, Amlor 5mg, Zocor 10mg, Calcum, Tegratol                            | No      | 11.4 | 9.2   |
|                                                                                             | No      | 11.6 | 9.7   |
| mg OD                                                                                       | No      | 13.7 | 6.9   |
| Capoten 50mg OD , Prednisolone 5mg , Zocor 20mg OD                                          | No      | 12.4 | 6.8   |
| Cepoten TID , HCT 25mg , Dimicon MR 60mg ,                                                  | No      | 13.4 | 8.4   |
| Lipitor 20 mg OD , Neurobion OD , Amalor 5mg OD, Covestin 5mg OD ASA 81mg OD                | Yes     | 14   | 6     |
| Asprin , Neurobion , Simvastatin 20mg                                                       | No      | 12.7 | 9.1   |
| Thyroxine, Capoten 25 mg                                                                    | No      | 11.1 | 11.8  |
|                                                                                             | No      | 10.2 |       |
|                                                                                             | No      | 12.7 | 6.9   |
|                                                                                             | No      | 11.2 | 8.8   |
|                                                                                             | No      |      |       |
|                                                                                             | No      | 12.2 | 7.7   |
| Capoten , Lipitor                                                                           | No      | 12.1 | 10.5  |
|                                                                                             | No      | 11.1 | 9.3   |
|                                                                                             | No      | 14   | 8.3   |
|                                                                                             | No      | 14.2 | 9.6   |
| Simvastatin, L-thyroxin, Asprin                                                             | No      | 13.3 | 6.5   |
|                                                                                             | No      |      | 11.4  |
| ASA                                                                                         | Yes     | 15.2 | 9.2   |
|                                                                                             | No      |      |       |
|                                                                                             | No      | 13.6 | 8     |
| Captopril, Zocor, Lasix, Aldacton                                                           | Yes     | 15.6 | 10.9  |
|                                                                                             | No      | 13.1 | 11    |
|                                                                                             | No      |      |       |
|                                                                                             | No      | 12.1 | 11.9  |

|                              |            |       |      |      |      |             | Dietary                         |
|------------------------------|------------|-------|------|------|------|-------------|---------------------------------|
| Fasting blood glucose mmol/l | Creatinine | TSH   | LDL  | HDL  | TG   | Total Chol. | Microalbumin / Creatinine Ratio |
| 20.3                         | 112        | 1.79  | 2.16 | 1.7  | 1.4  | 4.52        |                                 |
| 8.4                          | 93         | 1.313 | 2.09 | 0.85 | 1.54 | 3.14        |                                 |
| 7.9                          | 46         | 1.91  | 1.82 | 1.57 | 0.85 | 3.39        |                                 |
| 6                            | 81         | 3.66  | 2.27 | 1.03 | 1.46 | 3.2         |                                 |
| 6.8                          | 604        |       | 3.98 | 0.98 | 1.78 | 5.66        |                                 |
|                              | 74         | 1.02  |      |      | 0.69 | 2.89        |                                 |
| 13.3                         | 36         | 1.07  | 2.92 |      | 2.17 | 4.94        |                                 |
| 8.9                          | 102        |       | 1.87 |      | 0.91 | 3.37        |                                 |
| 7.8                          | 90         | 0.055 | 2.87 | 2.23 | 1.14 | 5.32        |                                 |
| 24.8                         | 55         | 0.478 | 2.62 | 1.51 | 0.65 | 4.51        |                                 |
| 5.0                          | 103        | 1.09  | 16.9 | 0.97 | 1.1  | 3.26        |                                 |
| 5.2                          | 74         | 0.09  | 2.27 | 1.04 | 1.1  | 3.98        |                                 |
| 5.4                          | 59         | 4.16  | 2.9  | 1.19 | 3.39 | 4.79        |                                 |
| 5.2                          | 93         | 2.55  | 0.89 | 0.87 | 3.64 | 3.96        |                                 |
| 7.1                          | 66         | 4.6   | 2.24 | 1.06 | 2.13 | 3.84        |                                 |
| 19.6                         | 80         | 2.6   | 2.62 | 0.94 | 1.47 | 3.85        |                                 |
|                              | 112        |       |      |      | 2.22 | 6.34        |                                 |
| 6                            | 60         | 3.5   | 2.32 | 0.92 | 3.64 | 4.56        | 0.94                            |
| 13.4                         | 57         | 2.8   | 2.9  | 1.71 | 1.2  | 4.47        |                                 |
|                              |            |       |      |      |      |             |                                 |
| 7.9                          | 57         | 3.72  | 2.65 | 1.18 | 2.88 | 4.33        |                                 |
| 7.7                          | 63         |       | 2.35 |      | 0.9  | 4.54        |                                 |
| 9.9                          | 38         | 3.67  | 1.99 | 1.64 | 0.98 | 3.8         |                                 |
| 7.2                          | 65         | 1.34  | 3.86 | 1.14 | 2.75 | 5.22        |                                 |
| 11.4                         | 108        | 1.09  | 2.14 | 1.01 | 1.95 | 3.81        |                                 |
| 5.6                          | 52         | 0.905 | 2.3  | 1.94 | 1.85 | 3.69        |                                 |
| 13.1                         | 54         | 2.4   | 2.65 | 1.15 | 0.94 | 4.23        |                                 |
| 13                           | 87         | 1.07  | 2.96 | 0.8  | 1.86 | 4.31        |                                 |
|                              |            |       |      |      |      |             |                                 |
| 7.7                          | 54         |       | 2.4  | 0.64 | 3.23 |             |                                 |
| 8.5                          | 121        | 2.17  | 3.1  | 1.32 | 1.47 | 4.5         |                                 |
| 11.7                         | 63         |       | 3.63 | 1.19 | 1.49 | 5.23        |                                 |
|                              |            |       |      |      |      |             |                                 |
|                              | 56         |       |      |      |      |             |                                 |

| / and lifestyle habits |       |       |                      |          |                        |               |         |         |          |                |
|------------------------|-------|-------|----------------------|----------|------------------------|---------------|---------|---------|----------|----------------|
| Exercise               | Juice | Sugar | Chocolates and candy | Desserts | High carbohydrate diet | High fat diet | Fasting | Consent | Sampels  | Notes          |
| Yes                    | No    | No    | No                   | No       | No                     | No            |         | Yes     | EDTA+GEL |                |
| No                     | No    | No    | No                   | No       | No                     | No            |         | Yes     | EDTA+GEL |                |
| Yes                    | No    | No    | No                   | No       | No                     | No            |         | Yes     | EDTA+GEL |                |
| No                     | Yes   | Yes   | Yes                  | Yes      | Yes                    | Yes           |         | Yes     | EDTA+GEL |                |
| No                     | No    | No    | No                   | No       | Yes                    | No            | Yes     | Yes     | EDTA+GEL |                |
| No                     | Yes   | Yes   | No                   | No       | No                     | No            |         | Yes     | EDTA+GEL |                |
| No                     | No    | Yes   | Yes                  | No       | Yes                    | No            |         | Yes     | EDTA+GEL | Semi hemolyzed |
| No                     | No    | Yes   | No                   | No       | No                     | No            |         | Yes     | EDTA+GEL |                |
| No                     | Yes   | No    | No                   | Yes      | Yes                    | No            |         | Yes     | EDTA+GEL |                |
| Yes                    | Yes   | Yes   | No                   | No       | Yes                    | No            |         | Yes     | EDTA+GEL |                |
| Yes                    | No    | No    | No                   | No       | No                     | No            |         | Yes     | EDTA+GEL |                |
| Yes                    | No    | No    | Yes                  | Yes      | Yes                    | No            |         | Yes     | EDTA+GEL | Semi hemolyzed |
| No                     | Yes   | No    | No                   | No       | No                     | Yes           |         | Yes     | EDTA+GEL |                |
| No                     | Yes   | No    | Yes                  | Yes      | Yes                    | Yes           |         | Yes     | EDTA+GEL |                |
| No                     | No    | Yes   | No                   | Yes      | Yes                    | No            |         | Yes     | EDTA+GEL |                |
| No                     | No    | Yes   | No                   | Yes      | No                     | No            |         | Yes     | EDTA+GEL |                |
| Yes                    | Yes   | Yes   | Yes                  | Yes      | Yes                    | No            |         | Yes     | EDTA+GEL |                |
| Yes                    | Yes   | No    | Yes                  | Yes      | Yes                    | No            |         | Yes     | EDTA+GEL |                |
| No                     | No    | No    | No                   | No       | Yes                    | No            |         | Yes     | EDTA+GEL |                |
| Yes                    | Yes   | No    | Yes                  | Yes      | No                     | No            |         | Yes     | EDTA+GEL |                |
|                        |       |       |                      |          |                        |               |         | Yes     | EDTA+GEL |                |
| No                     | No    | No    | No                   | No       | Yes                    | Yes           |         | Yes     | EDTA+GEL |                |
| No                     | No    | No    | No                   | No       | No                     | No            | Yes     | Yes     | EDTA+GEL |                |
| No                     | Yes   | Yes   | No                   | Yes      | Yes                    | No            | No      | Yes     | EDTA+GEL |                |
| No                     | Yes   | No    | Yes                  | Yes      | Yes                    | No            | Yes     | Yes     | EDTA+GEL |                |
| No                     | Yes   | Yes   | No                   | No       | Yes                    | Yes           | Yes     | Yes     | EDTA+GEL |                |
| No                     | No    | No    | No                   | No       | No                     | Yes           | No      | Yes     | EDTA+GEL |                |
| No                     | No    | No    | No                   | No       | Yes                    | No            | Yes     | Yes     | EDTA+GEL |                |
| Yes                    | Yes   | Yes   | No                   | No       | No                     | No            | Yes     | Yes     | EDTA+GEL | Semi hemolyzed |
| Yes                    | Yes   | No    | No                   | No       | Yes                    | Yes           | Yes     | Yes     | EDTA+GEL |                |
| No                     | Yes   | Yes   | No                   | No       | Yes                    | No            | No      | Yes     | EDTA+GEL | Semi hemolyzed |
| No                     | Yes   | Yes   | Yes                  | No       | Yes                    | No            | Yes     | Yes     | EDTA+GEL |                |
| No                     | Yes   | No    | No                   | No       | Yes                    | No            | Yes     | Yes     | EDTA+GEL |                |
| Yes                    | Yes   | No    | No                   | No       | No                     | No            | Yes     | Yes     | EDTA+GEL |                |

Table 3. Raw negatively charged secondary metabolomic data as indicated by peak ID for control individuals and T2D patients.

| Peak.ID | mz_mean  | Intensity_r | D120230 | D120231 | D120232 | D120233 | D120254 | D120255 | D120259 | D120260 | D120261 | D120262 | D120263 |
|---------|----------|-------------|---------|---------|---------|---------|---------|---------|---------|---------|---------|---------|---------|
| 2       | 102.9554 | 3340558     | 3509137 | 3785087 | 3751345 | 3646873 | 2407743 | 3286775 | 3359061 | 2739872 | 2931038 | 3101456 | 3176884 |
| 3       | 103.0386 | 538286      | 250775  | 237075  | 423915  | 402469  | 143598  | 346463  | 300393  | 1102593 | 1433877 | 1081082 | 1691512 |
| 4       | 104.9525 | 1027455     | 1074781 | 1220102 | 1188855 | 1152764 | 730393  | 979730  | 1031220 | 865370  | 891714  | 931175  | 982493  |
| 5       | 105.018  | 122106      | 122688  | 231248  | 134688  | 148712  | 112017  | 122804  | 99245   | NA      | 85427   | 78295   | 104541  |
| 6       | 107.9926 | 118572      | 85587   | 81411   | 128559  | 175263  | 690486  | NA      | 123503  | NA      | 79091   | 94499   | 385744  |
| 7       | 108.9007 | 108833      | 97460   | 93514   | 108473  | 82965   | 125106  | 132279  | 107543  | 103743  | 113748  | 82356   | 105646  |
| 8       | 110.8977 | 73392       | NA      | NA      | 65401   | NA      | 78439   | 81327   | 68599   | 68146   | 69240   | NA      | 68983   |
| 9       | 112.9842 | 9070540     | 8879197 | 8932497 | 8649032 | 9149266 | 9134470 | 9887512 | 8349479 | 7192919 | 7118910 | 7769288 | 7405722 |
| 10      | 112.9842 | 1349035     | 1416095 | 485534  | 528073  | 1758338 | 7551479 | 949910  | 1297637 | 2249112 | 2475330 | 2096761 | 1665826 |
| 13      | 115.0388 | 182624      | 127488  | 127870  | 203988  | 157427  | 108163  | 141665  | 97946   | 219294  | 360465  | 282008  | 404804  |
| 17      | 116.9274 | 190534      | 191971  | 162488  | 220101  | 153084  | 113140  | 185110  | NA      | 169465  | 77561   | 201273  | 149644  |
| 21      | 117.018  | 120771      | 100575  | 129135  | 94952   | 201686  | NA      | 95369   | 117421  | 106550  | 69203   | 88762   | 81964   |
| 22      | 117.0543 | 390790      | 482218  | 305485  | 1053817 | 194378  | 85983   | 218819  | 149277  | 524552  | 543941  | 475482  | 1493899 |
| 23      | 124.0062 | 174920      | 201732  | 179890  | 225157  | 236686  | 96553   | 95947   | 122157  | 80817   | NA      | 82367   | 108551  |
| 24      | 124.9232 | 91467       | 89138   | 110503  | NA      | 76963   | 130039  | 95249   | 80619   | NA      | 86972   | 58785   | 60115   |
| 25      | 126.9211 | 96504       | 89657   | 123005  | NA      | 75296   | 141994  | 88243   | 75687   | NA      | 87390   | 63945   | 61195   |

| D120264 | D120265 | D120266 | D120267 | D120268 | D120344 | D120345 | D120346 | D120347 | D120348 | D120349 | D120359 | D120377 | D120378 |
|---------|---------|---------|---------|---------|---------|---------|---------|---------|---------|---------|---------|---------|---------|
| 3702656 | 3547179 | 3597596 | 3285885 | 3226732 | 3503077 | 2872076 | 3500198 | 3651740 | 3102174 | 3137718 | 2820898 | 2885665 | 3144511 |
| 972270  | 614714  | 786656  | 524985  | 350969  | 601505  | 689271  | 518110  | 470511  | 1833114 | 901295  | 478029  | 208715  | 554051  |
| 1178184 | 1120220 | 1148082 | 1001901 | 1014813 | 1077817 | 870897  | 1105565 | 1139223 | 919166  | 923504  | 847168  | 888246  | 937498  |
| 73812   | 207391  | 63579   | 111254  | 130384  | 61762   | 73878   | NA      | 101224  | 99942   | 70549   | NA      | 59069   | 105694  |
| 59629   | 171210  | NA      | 98334   | 98098   | NA      | 178552  | 94657   | 69368   | NA      | 138768  | 103606  | 121857  | 102312  |
| 92146   | 113743  | 85218   | 95213   | 102627  | 111675  | 108247  | 95024   | 97680   | 128148  | 104265  | 118734  | 95233   | 92161   |
| 59651   | 65432   | NA      | 58098   | 66243   | 78845   | 64148   | NA      | NA      | 75934   | 65296   | NA      | 61035   | 57910   |
| 8370529 | 8220539 | 8912180 | 7726592 | 8350811 | 9393996 | 7621522 | 9218623 | 9090027 | 9520702 | 8166907 | 9921550 | 8182442 | 8901143 |
| 676475  | 1367006 | 481914  | 1939861 | 1478486 | 435023  | 1724148 | 1478901 | 878046  | 370555  | 1979339 | 1443293 | 1826896 | 666151  |
| 162754  | 180722  | 215815  | 264501  | 156258  | 225494  | 204254  | 212922  | 181174  | 253720  | 291077  | 153250  | 277971  | 212272  |
| 152064  | 109782  | 186356  | 106252  | 147031  | 212294  | 119640  | 202677  | 196586  | 191732  | 195720  | NA      | 88075   | 203792  |
| 109000  | 83158   | 196169  | 131278  | 310470  | 103519  | 77362   | 170785  | 159894  | 100452  | 135804  | 99736   | 76916   | 91173   |
| 576121  | 253685  | 563230  | 492250  | 351849  | 140686  | 291005  | 715290  | 566588  | 540726  | 415239  | 305236  | 257849  | 203696  |
| 144973  | 123471  | NA      | 174311  | 133062  | NA      | 82794   | 94242   | 146416  | 103167  | 84081   | 133695  | 65094   | NA      |
| NA      | 91856   | 72067   | 116969  | 84693   | 64743   | 112617  | 75567   | 101473  | NA      | 93863   | 130079  | 79909   | 86687   |
| NA      | 97551   | 68898   | 122393  | 83521   | 68051   | 116124  | 82817   | 101590  | NA      | 108791  | 139153  | 74682   | 88854   |



| D120379 | D120394 | D120395 | D120401 | D120402  | D120403 | D120404 | D120405 | D120406 | D120443 | D120444 | D120445 | D120446 | D120447 |
|---------|---------|---------|---------|----------|---------|---------|---------|---------|---------|---------|---------|---------|---------|
| 3440954 | 3480726 | 3374501 | 3245392 | 2910891  | 3621007 | 3325939 | 3375380 | 3897105 | 3647859 | 3785577 | 3652957 | 2923244 | 3375426 |
| 496346  | 386405  | 650872  | 1031033 | 254013   | 372475  | 2204511 | 440044  | 444962  | 232254  | 484482  | 391204  | 450408  | 303941  |
| 1043559 | 1115556 | 1050200 | 990843  | 840600   | 1141698 | 1032984 | 1037654 | 1233478 | 1121324 | 1176684 | 1100127 | 865444  | 1023280 |
| 93125   | NA      | 68587   | 69965   | 104039   | 94067   | NA      | 156888  | 133139  | 105921  | NA      | 109926  | 95420   | 88782   |
| 78296   | 151929  | NA      | NA      | 138263   | 108098  | 82011   | NA      | 62731   | 89416   | 81234   | 63339   | 88949   | 298872  |
| 131932  | 104084  | 101530  | 124088  | 123128   | 150074  | 114074  | 118520  | 127884  | 117753  | 114224  | 94405   | 86530   | 119158  |
| 73456   | 64795   | 63634   | 73358   | 72947    | 94067   | 68308   | 73350   | 85595   | 74548   | 63227   | NA      | NA      | 74263   |
| 9904218 | 9346971 | 9697917 | 8749944 | 10923865 | 9786040 | 8614199 | 9677314 | 9439489 | 9128241 | 9428620 | 9984218 | 7924211 | 8208673 |
| 811170  | 339031  | 723226  | 1138412 | 3213757  | 642643  | 555850  | 943194  | 462053  | 1635628 | 995881  | 394184  | 1957776 | 2092943 |
| 179049  | 220269  | 206234  | 212978  | 136946   | 175728  | 276476  | 147612  | 222588  | 116849  | 164067  | 245536  | 241551  | 155888  |
| 187405  | 199860  | 153490  | 126054  | 223063   | 204478  | 150190  | 86942   | 289983  | 119180  | 163307  | 259575  | 98009   | 151701  |
| 138494  | 115295  | 104016  | 77228   | 116372   | 110082  | 74282   | 112658  | 98151   | 116078  | 122280  | 94588   | 92279   | 182078  |
| 162428  | 438375  | 295923  | 282451  | 405942   | 315960  | 1088617 | 231156  | 349366  | 280838  | 704560  | 534835  | 413342  | 209168  |
| 103635  | NA      | 92124   | 78016   | 205439   | 152427  | 85140   | 96032   | 79082   | 90566   | 89316   | 75309   | 134676  | 205704  |
| NA      | NA      | 91102   | 73796   | 102367   | 66534   | 59417   | 66093   | 81667   | 72633   | 79681   | 65444   | 62313   | 92604   |
| 71756   | NA      | 95891   | 83846   | 109161   | 69001   | 64254   | 63700   | 79920   | 83729   | 85816   | NA      | 66143   | 105150  |

| D120461  | D120462 | D120464 | D130276 | D130277 | D130280  | D130281 | D130282 | D130283  | D130284  | D130285 | D130286  | D130287 | D130288 |
|----------|---------|---------|---------|---------|----------|---------|---------|----------|----------|---------|----------|---------|---------|
| 3743165  | 2339306 | 3673332 | 3390987 | 2948287 | 3135384  | 3815689 | 3338655 | 3486847  | 3090600  | 3109755 | 3350275  | 3432235 | 3552943 |
| 288335   | 280582  | 362512  | NA      | 1386778 | 329337   | 313942  | 372605  | 338897   | 117423   | 463773  | 190840   | 321210  | 225399  |
| 1157240  | 654206  | 1142023 | 1030916 | 921341  | 902703   | 1188161 | 1041638 | 1034026  | 941437   | 1011014 | 1043579  | 1020097 | 1065456 |
| 149522   | NA      | 115234  | 109031  | 109425  | 92580    | 83931   | 83383   | 118440   | 88357    | 68800   | 83548    | 99944   | 66753   |
| 94579    | NA      | 84388   | 76722   | NA      | 69933    | 78512   | 100423  | 131044   | 72902    | NA      | NA       | 78809   | 123835  |
| 105985   | 96331   | 106318  | 99114   | 84477   | 112943   | 124755  | 114897  | 99969    | 92266    | 91168   | 100603   | 102723  | 101172  |
| 62647    | NA      | NA      | 59244   | NA      | NA       | 79732   | 74335   | NA       | NA       | NA      | NA       | 63075   | NA      |
| 10175047 | 7310832 | 9353374 | 9134219 | 8687964 | 10872118 | 9153216 | 9350761 | 10912496 | 11149535 | 9245213 | 10273719 | 9280361 | 8853965 |
| 636543   | 974237  | 857498  | 409412  | 481462  | 2567436  | 1184257 | 504191  | 613397   | 2350621  | 529729  | 577893   | 568784  | 1683227 |
| 166446   | 138437  | 134098  | 105837  | 261087  | 139086   | 217967  | 205135  | 139094   | 88673    | 195265  | 107826   | 179052  | 113749  |
| NA       | 97822   | 186139  | 272667  | 298484  | 164170   | 239588  | 239670  | 181991   | 152032   | 155107  | 253692   | 204308  | 203373  |
| 152598   | 68746   | 99529   | NA      | 106042  | 113439   | 90120   | 161299  | 167606   | 102513   | 120055  | 114230   | 96533   | 121519  |
| 249904   | 170641  | 243863  | 192231  | 334848  | 226469   | 242179  | 496403  | 143394   | 603257   | 329855  | 258969   | 255255  | 126355  |
| 101779   | 115726  | NA      | 220370  | 176378  | 194380   | 281190  | 288200  | 224274   | 350487   | 181546  | 231135   | 130464  | 274439  |
| 106435   | 64996   | 70305   | 58840   | 60799   | 80910    | 183452  | 148846  | 68399    | 66533    | 66975   | NA       | NA      | 162888  |
| 109986   | 70535   | 75217   | 72838   | 68284   | 80811    | 199762  | 171183  | 80954    | 77864    | 63614   | NA       | NA      | 172562  |

| D130289 | D130290 | D130291 | D130293 | D130294 | D130295  | D130296 | D130297 | D130298 | D130300 | D130301 | D130302 | D130303  | D130304 |
|---------|---------|---------|---------|---------|----------|---------|---------|---------|---------|---------|---------|----------|---------|
| 3567677 | 4011976 | 3681767 | 3512833 | 3674154 | 2475383  | 3002056 | 3203732 | 3220415 | 3589493 | 3208405 | 3394900 | 3656581  | 3533266 |
| 180882  | 203744  | 223126  | 620163  | 664642  | 218282   | 162367  | 306062  | 486572  | 312678  | 351727  | 232189  | 305789   | 207942  |
| 1064087 | 1236544 | 1151650 | 1085421 | 1180396 | 739498   | 913356  | 993475  | 1022830 | 1083663 | 995735  | 1026826 | 1141947  | 1053648 |
| 101266  | 111528  | 152249  | 74253   | 71033   | 79758    | 553773  | 74305   | 83114   | 119158  | 90423   | NA      | NA       | 77236   |
| 95869   | 208666  | 67653   | 75636   | 58200   | NA       | 95923   | 91023   | 70298   | 140243  | 94106   | 80554   | 72998    | 70403   |
| 99080   | 111540  | 103748  | 90983   | 83982   | 86269    | 107830  | 100754  | 91317   | 117200  | 83114   | 96416   | 95062    | 103499  |
| 62799   | 67650   | 64022   | NA      | NA      | NA       | 64986   | NA      | 55689   | 67714   | NA      | NA      | NA       | NA      |
| 9357258 | 9897204 | 9520359 | 9519642 | 9667258 | 11532879 | 8986788 | 8093356 | 9298428 | 9525301 | 7775042 | 9938548 | 10070430 | 9057642 |
| 1215540 | 1323913 | 3444550 | 878126  | 487045  | 3164153  | 3395454 | 1694430 | 758809  | 954592  | 2098874 | 694244  | 529627   | 2084481 |
| 88806   | 113180  | 102975  | 182940  | 217654  | 109914   | 123370  | 197388  | 190558  | 113801  | 172743  | 109110  | 101204   | 148948  |
| 190316  | 116101  | 249804  | 183807  | 234955  | 196916   | 169756  | 103013  | 229038  | 203744  | 163829  | 122684  | 273618   | 154005  |
| 152109  | 117906  | 128763  | 165934  | 114909  | 74471    | 118900  | 105220  | 99302   | 152691  | 107434  | 131315  | 152263   | 114535  |
| 200498  | 157777  | 389831  | 363863  | 301945  | 193348   | 273451  | 394618  | 363257  | 150231  | 287577  | 135533  | 140953   | 217184  |
| 278239  | 276236  | 301340  | 263697  | 184677  | 215155   | 239410  | 182745  | 163784  | 209966  | 271944  | 203356  | 316307   | 210238  |
| 74099   | 144312  | 113093  | 121652  | 117783  | 107401   | 157152  | 136326  | 91169   | 72343   | 91680   | NA      | 95270    | 71350   |
| 68054   | 149965  | 111106  | 126845  | 113907  | 113328   | 176551  | 151745  | 100386  | 79662   | 96594   | NA      | 98453    | 77127   |

|    |          |         |         |         |         |         |         |         |         |         |         |         |         |
|----|----------|---------|---------|---------|---------|---------|---------|---------|---------|---------|---------|---------|---------|
| 26 | 126.9791 | 681014  | 534547  | 705883  | 834345  | 588743  | 425420  | 869789  | 673967  | 769247  | 709172  | 692937  | 519023  |
| 27 | 128.034  | 864602  | 745367  | 1022847 | 864853  | 1215050 | 498617  | 844587  | 868984  | 649219  | 608675  | 710255  | 762475  |
| 28 | 128.9583 | 155856  | 136891  | 130740  | 138090  | 123680  | 209219  | 202345  | 159334  | 117594  | 119201  | 106563  | 134029  |
| 29 | 128.9762 | 325510  | 258767  | 354321  | 387427  | 285985  | 203006  | 406326  | 334838  | 349311  | 331757  | 321712  | 249817  |
| 30 | 129.0544 | 697377  | 436068  | 419206  | 855411  | 623286  | 222480  | 556951  | 356109  | 709422  | 1395400 | 1016169 | 1630212 |
| 31 | 129.0544 | 872587  | 588297  | 546373  | 886097  | 594449  | 221029  | 571140  | 472061  | 923586  | 1825246 | 1504946 | 2417820 |
| 33 | 133.0131 | 108548  | 67431   | 62081   | 190533  | 119849  | 77941   | NA      | NA      | 126062  | 98868   | 85231   | 89120   |
| 36 | 135.0287 | 356128  | 235919  | 587312  | 359154  | 416800  | 2108648 | 303432  | 511575  | 85247   | 154969  | 255336  | 425563  |
| 37 | 135.0286 | 2047944 | 1547574 | 1780933 | 2860649 | 1727605 | 1220616 | 1627563 | 1214962 | 1562834 | 1348243 | 2319963 | 2011538 |
| 38 | 135.0287 | 180381  | 173899  | 134863  | 327939  | 273171  | NA      | 74988   | 64644   | 60739   | 110027  | 240924  | 233793  |
| 40 | 137.0079 | 563385  | 599856  | 566454  | 645746  | 582492  | 577684  | 634670  | 606979  | 398072  | 394179  | 581240  | 437277  |
| 41 | 137.008  | 238891  | 177180  | 157570  | 226168  | 142787  | 165386  | 316165  | 333164  | 367139  | 339596  | 326327  | 243022  |
| 42 | 137.0078 | 288405  | 677100  | 177989  | 373839  | NA      | 662984  | NA      | 648419  | NA      | 457197  | 709879  | 486498  |
| 45 | 145.0607 | 217457  | 198992  | 228465  | 169070  | 216571  | 181072  | 251613  | 237120  | 131030  | 143781  | 140042  | 156339  |
| 46 | 146.0447 | 135377  | 131210  | 146399  | 109106  | 137666  | NA      | NA      | NA      | NA      | NA      | 79518   | 99035   |
| 48 | 148.0272 | 113513  | 104489  | 101467  | 100036  | 153467  | 226756  | NA      | 115718  | NA      | NA      | 62269   | 108230  |
| 49 | 149.0443 | 173013  | 102237  | 88214   | 152838  | 136481  | NA      | 137623  | 118365  | 316750  | 346819  | 313304  | 360152  |

|         |         |         |         |         |         |         |         |         |         |         |         |         |         |
|---------|---------|---------|---------|---------|---------|---------|---------|---------|---------|---------|---------|---------|---------|
| 629188  | 608915  | 875819  | 476484  | 767543  | 1011262 | 614190  | 685989  | 649252  | 984106  | 814085  | 841307  | 632284  | 1073696 |
| 922468  | 1018942 | 1132407 | 912292  | 643679  | 657022  | 537521  | 829577  | 1107314 | 635554  | 388842  | 317683  | 309710  | NA      |
| 111209  | 122611  | 131147  | 103554  | 133734  | 176235  | 141123  | 127146  | 136076  | 165263  | 142629  | 203744  | 118173  | 152610  |
| 306943  | 266113  | 404967  | 226578  | 344139  | 463773  | 288529  | 335280  | 308825  | 431906  | 393113  | 413141  | 307785  | 498141  |
| 857441  | 881166  | 926556  | 812885  | 830703  | 849814  | 698601  | 691714  | 590057  | 1065163 | 722906  | 621531  | 855666  | 1022841 |
| 934711  | 1329335 | 1388834 | 1049982 | 840599  | 847229  | 923537  | 792066  | 683319  | 1313194 | 928604  | 770517  | 1001324 | 1395930 |
| 53456   | 161979  | 88186   | 72322   | 54164   | 162341  | 79794   | 104346  | 102891  | NA      | 102572  | 99729   | 132359  | 116167  |
| 247414  | 452454  | 121824  | 359299  | 201870  | 253105  | 292031  | 160283  | 244435  | 237441  | 251707  | 143089  | 184683  | 336022  |
| 1563440 | 1474186 | 1539714 | 1361334 | 1421697 | 2187927 | 1467072 | 1749908 | 1694904 | 1654243 | 1916543 | 1613489 | 2081571 | 2324124 |
| 188076  | 139143  | 85981   | 121283  | 80671   | 145459  | 121401  | 163103  | 263469  | 77803   | 120713  | NA      | NA      | NA      |
| 622149  | 572586  | 428184  | 497819  | 548128  | 540277  | 441469  | 573358  | 579631  | 593686  | 428154  | 507132  | 476717  | 568298  |
| 157179  | 275086  | 276488  | 212457  | 397556  | 360668  | 331412  | 247905  | 194025  | 362348  | 346940  | 435776  | 281670  | 422308  |
| 568479  | 550200  | 142636  | NA      | 291143  | 628210  | 332957  | 72306   | 164787  | 449922  | 83530   | 82169   | NA      | 296825  |
| 201786  | 263149  | 181939  | 234088  | 152912  | 156415  | 168444  | 203159  | 264896  | 133621  | 119152  | 157691  | 164275  | 149268  |
| 132013  | 76688   | 61872   | 79617   | NA      | NA      | NA      | 95994   | 138787  | NA      | NA      | 72000   | NA      | 72546   |
| 153045  | 134458  | NA      | 87594   | NA      | NA      | 110474  | 73310   | 110393  | NA      | NA      | NA      | NA      | NA      |
| 279990  | 212349  | 247805  | 180384  | 128023  | 204093  | 225906  | 181229  | 166411  | 372528  | 294024  | 184380  | 83913   | 175375  |

|         |         |         |         |         |         |         |         |         |         |         |         |         |         |
|---------|---------|---------|---------|---------|---------|---------|---------|---------|---------|---------|---------|---------|---------|
| 1116915 | 775091  | 966493  | 873395  | 751082  | 804846  | 821401  | 718915  | 1213375 | 620347  | 588019  | 762830  | 289081  | 537320  |
| 530680  | 740026  | 563454  | 458533  | 638143  | 896790  | 895205  | 665503  | 589104  | 961917  | 982887  | 715465  | 837787  | 1214967 |
| 215472  | 145621  | 145743  | 142764  | 223773  | 216251  | 147683  | 175215  | 202737  | 142176  | 151877  | 151528  | 97527   | 146487  |
| 498853  | 343774  | 416298  | 386509  | 359867  | 358682  | 394629  | 342760  | 524058  | 307719  | 291907  | 378843  | 134774  | 269595  |
| 592542  | 719371  | 690076  | 638537  | 386724  | 544774  | 1254390 | 576728  | 616771  | 557838  | 544365  | 823827  | 1267322 | 611075  |
| 681991  | 903136  | 703109  | 966835  | 493435  | 586275  | 1680888 | 817408  | 829278  | 708864  | 641081  | 969767  | 1344257 | 933962  |
| NA      | 64252   | 85429   | 63551   | 81514   | 70048   | 69722   | 57486   | 97244   | NA      | NA      | 75397   | 95440   | 93342   |
| 445713  | 164586  | 159014  | 204690  | 364058  | 284202  | 135209  | 391117  | 420074  | 359053  | 171888  | 266476  | 367013  | 482111  |
| 1750033 | 1657596 | 1531699 | 1483088 | 1796527 | 1916459 | 1347839 | 1553495 | 2405119 | 1593755 | 1546877 | 1753553 | 1698405 | 1512819 |
| 119179  | 115343  | 173672  | NA      | NA      | 125426  | 160335  | NA      | 89653   | 83062   | 135382  | 136415  | 105166  | 123206  |
| 632005  | 505860  | 588174  | 602629  | 535515  | 592823  | 467997  | 598622  | 631724  | 612190  | 565344  | 688608  | 487069  | 482261  |
| 337485  | 167529  | 346829  | 420278  | 231599  | 282407  | 316099  | 295761  | 388001  | 219750  | 159998  | 204765  | 147612  | 204249  |
| 672522  | 73690   | 582261  | 73495   | 132453  | 71569   | 268294  | NA      | 101501  | 128542  | 71549   | 75674   | NA      | NA      |
| 233397  | 200889  | 149204  | 113860  | 268858  | 218501  | 201349  | 140763  | 147755  | 240876  | 258443  | 276478  | 327908  | 315054  |
| NA      | 85575   | NA      | 61113   | 95939   | NA      | NA      | NA      | NA      | NA      | 99848   | 76627   | 102084  | 96050   |
| NA      | 99067   | NA      | NA      | 93215   | 105229  | 71547   | NA      | NA      | 113798  | 151449  | 106535  | 89627   | 106881  |
| 176027  | 154445  | 227097  | 322819  | 105422  | 150940  | 356444  | 166864  | 165016  | 95424   | 178749  | 143683  | 151568  | 119174  |

|         |         |         |         |         |         |         |         |         |         |         |         |         |         |
|---------|---------|---------|---------|---------|---------|---------|---------|---------|---------|---------|---------|---------|---------|
| 688835  | 115619  | 729790  | 638117  | 933205  | 664269  | 607909  | 748250  | 655105  | 652211  | 790619  | 653795  | 768109  | 661445  |
| 1189797 | 837583  | 638952  | NA      | 708212  | 749250  | 749072  | 1012569 | 1021441 | 881407  | 710242  | 801701  | 745766  | 546792  |
| 149845  | 94935   | 146378  | 156431  | 144107  | 200896  | 150813  | 171670  | 167941  | 198864  | 130355  | 161686  | 133642  | 136737  |
| 350066  | NA      | 343140  | 298732  | 391949  | 318063  | 314452  | 360579  | 317084  | 299931  | 368824  | 309743  | 351519  | 309697  |
| 811165  | 433581  | 468296  | 561812  | 1315309 | 661799  | 749222  | 659351  | 472727  | 300137  | 795936  | 448248  | 608036  | 458593  |
| 938138  | 634903  | 666372  | 749948  | 2063667 | 612617  | 829611  | 750014  | 511633  | 291543  | 777199  | 454256  | 736287  | 521383  |
| NA      | 63975   | 59516   | 141885  | 242679  | NA      | 88820   | 91747   | NA      | NA      | 63758   | NA      | NA      | 61394   |
| 456150  | 288132  | 323182  | 396994  | 413638  | 439647  | 386503  | 491694  | 425121  | 406615  | 253633  | 214123  | 381187  | 291502  |
| 1263916 | 1359127 | 1733440 | 2068502 | 4895351 | 1809273 | 2361568 | 1926858 | 1723407 | 2059153 | 1723424 | 1784628 | 1744725 | 2190164 |
| 108860  | NA      | 82504   | NA      | 277266  | NA      | 164781  | 215884  | 112227  | 96162   | 141480  | NA      | 101332  | NA      |
| 558313  | 228115  | 677305  | 509576  | 538468  | 702803  | 640568  | 595000  | 739330  | 687468  | 614485  | 680226  | 631068  | 684472  |
| 197384  | 95777   | 183704  | 145033  | 454425  | 164728  | 164589  | 170130  | 142453  | 146720  | 232029  | 145031  | 232637  | 257695  |
| 63915   | NA      | NA      | NA      | NA      | NA      | 139779  | NA      | NA      | NA      | 87221   | 80660   | 57539   | NA      |
| 246223  | 524407  | 189937  | 337715  | 183061  | 238731  | 208107  | 253039  | 288085  | 230508  | 190986  | 274768  | 233711  | 170387  |
| 67028   | 83921   | 84468   | 81817   | 74266   | 100947  | 155322  | 107456  | 97147   | 113194  | 116744  | 125809  | 77479   | 78756   |
| 149499  | 72689   | 142042  | 91467   | NA      | 120352  | 106834  | 101000  | 129229  | 96327   | 92630   | 88878   | 82004   | 89262   |
| 104315  | 83129   | 131189  | NA      | 365633  | 116316  | 126422  | 123120  | 121382  | NA      | 159242  | 82032   | 124346  | 89814   |

|         |         |         |         |         |         |         |         |         |         |         |         |         |         |
|---------|---------|---------|---------|---------|---------|---------|---------|---------|---------|---------|---------|---------|---------|
| 499912  | 479203  | 459049  | 547286  | 703129  | 661668  | 464247  | 526074  | 629829  | 737668  | 508503  | 531641  | 596468  | 607221  |
| 1100994 | 1267915 | 905833  | 1086138 | 1018007 | 508214  | 886303  | 984673  | 880244  | 888139  | 945826  | 746132  | 701042  | 714414  |
| 137748  | 171178  | 146090  | 130988  | 130171  | 193853  | 141459  | 108174  | 153532  | 176275  | 100671  | 149303  | 164914  | 137904  |
| 247618  | 237753  | 217545  | 266209  | 326252  | 332415  | 229723  | 255444  | 296086  | 365749  | 253571  | 275786  | 309525  | 296761  |
| 320517  | 373775  | 340824  | 764409  | 820517  | 292463  | 417502  | 675598  | 708654  | 438853  | 639412  | 423130  | 426417  | 604450  |
| 354977  | 460012  | 445715  | 912449  | 1185610 | 405494  | 578331  | 869472  | 875996  | 546794  | 777883  | 468502  | 508812  | 749504  |
| 69667   | 65923   | 78734   | 76361   | 77609   | NA      | 78692   | 63968   | NA      | 69371   | 87483   | 63556   | 83767   | NA      |
| 475194  | 544228  | 561475  | 527825  | 294279  | 395126  | 527869  | 228367  | 328755  | 405893  | 367279  | 111895  | 302093  | 409938  |
| 1845339 | 1579647 | 2389224 | 2115445 | 2777032 | 1728558 | 1643371 | 1211946 | 1526410 | 1580425 | 1792394 | 1770663 | 3090626 | 1617033 |
| 145039  | NA      | NA      | 248689  | 213935  | NA      | NA      | 201204  | 136386  | 123407  | 162040  | 124912  | 118987  | 91013   |
| 572722  | 531099  | 601429  | 562770  | 643391  | 654506  | 491351  | 527781  | 680275  | 590462  | 450220  | 694103  | 629287  | 610433  |
| 128571  | 136473  | 148416  | 148827  | 197218  | 151353  | 188370  | 197983  | 140846  | 223942  | 167777  | 134576  | 146972  | 221641  |
| NA      | NA      | NA      | NA      | NA      | 79631   | NA      | NA      | NA      | NA      | NA      | NA      | 71809   | NA      |
| 240666  | 308086  | 175257  | 283962  | 238092  | 259694  | 252768  | 221996  | 231607  | 199850  | 185511  | 202488  | 257337  | 219287  |
| 147974  | 150079  | 173928  | 211262  | 185253  | 74506   | 78871   | 177867  | 126234  | 102111  | 100973  | 108826  | 139447  | 106225  |
| 95111   | 108752  | 134141  | 119074  | 145636  | 136034  | 152398  | 129340  | 166585  | 91813   | 89074   | 90786   | 104702  | 83917   |
| 75299   | 82551   | 85721   | 203744  | 240775  | 90499   | 71939   | 115288  | 184302  | 119985  | 137519  | 92693   | 111891  | 91052   |



|    |          |         |         |         |         |         |         |         |         |         |         |         |         |
|----|----------|---------|---------|---------|---------|---------|---------|---------|---------|---------|---------|---------|---------|
| 50 | 150.8855 | 1405353 | 1457011 | 1443615 | 1399479 | 1456495 | 1436604 | 1440917 | 1401314 | 1283454 | 1281669 | 1290212 | 1273999 |
| 51 | 152.8825 | 1333290 | 1340628 | 1347209 | 1264453 | 1381501 | 1395812 | 1384096 | 1312545 | 1179339 | 1236927 | 1186114 | 1175249 |
| 52 | 154.8796 | 416595  | 425273  | 430424  | 420589  | 437852  | 430155  | 421743  | 398974  | 370470  | 362662  | 383213  | 377911  |
| 54 | 158.9775 | 124987  | 117039  | 99271   | 187284  | 125234  | 126111  | 96780   | 125373  | 136247  | 113824  | 125475  | 83482   |
| 55 | 158.99   | 599319  | 609136  | 252363  | 241367  | 592209  | 4454077 | 519506  | 491001  | 935546  | 987964  | 744130  | 616662  |
| 56 | 160.841  | 299847  | 279725  | 262621  | 247924  | 250656  | 455469  | 349366  | 275918  | 269612  | 269978  | 242302  | 239294  |
| 57 | 160.9144 | 1176375 | 1204016 | 1254459 | 1229155 | 1273865 | 878846  | 1201139 | 1173632 | 1083103 | 1175194 | 1141666 | 1153180 |
| 58 | 162.838  | 300215  | 307320  | 263565  | 256129  | 248166  | 443615  | 334711  | 287703  | 264496  | 261185  | 250590  | 239369  |
| 59 | 162.9114 | 748280  | 762023  | 798787  | 784167  | 813382  | 569900  | 773649  | 747983  | 688895  | 771695  | 737234  | 736537  |
| 60 | 163.0601 | 149367  | 182900  | 123477  | 335310  | 76386   | NA      | 83782   | 64341   | 185081  | 190400  | 183783  | 398826  |
| 61 | 164.8351 | 98332   | 87841   | 86659   | 81246   | NA      | 140557  | 111768  | 90242   | 81001   | 83290   | 77794   | NA      |
| 62 | 164.9084 | 107946  | 104055  | 113191  | 105417  | 110101  | NA      | 106206  | 102765  | 101530  | 104572  | 102314  | 105758  |
| 63 | 166.0378 | 154109  | 311746  | NA      | NA      | 191071  | NA      | 80129   | 266892  | NA      | 105474  | 85848   | 130915  |
| 64 | 167.0199 | 3267532 | 3695807 | 3459775 | 3600483 | 3469139 | NA      | 3357050 | 2956177 | 1946155 | 2403136 | 3288540 | 3129129 |
| 65 | 170.9432 | 1781876 | 1739951 | 1885455 | 1754543 | 1844279 | 1586320 | 1872767 | 1817024 | 1362464 | 1411206 | 1594896 | 1587086 |
| 66 | 172.9403 | 540844  | 534139  | 595920  | 555686  | 575956  | 456126  | 561106  | 566284  | 399967  | 406900  | 488378  | 485205  |
| 67 | 174.0397 | 337943  | 322363  | 342442  | 283947  | 368902  | 243398  | 367245  | 349471  | 274972  | 252577  | 279882  | 289108  |
| 69 | 175.0601 | 167793  | 130895  | 123822  | 202945  | 155422  | 65867   | 152293  | 100256  | 185386  | 262043  | 219923  | 273560  |

|         |         |         |         |         |         |         |         |         |         |         |         |         |         |
|---------|---------|---------|---------|---------|---------|---------|---------|---------|---------|---------|---------|---------|---------|
| 1373499 | 1456374 | 1299663 | 1358240 | 1316576 | 1380135 | 1352192 | 1388209 | 1471857 | 1448610 | 1364160 | 1409415 | 1371393 | 1221922 |
| 1274655 | 1340973 | 1277239 | 1304865 | 1239962 | 1285365 | 1285295 | 1336010 | 1425471 | 1423505 | 1292528 | 1341070 | 1276488 | 1132533 |
| 408713  | 432545  | 403196  | 392215  | 392955  | 417298  | 393623  | 411005  | 438254  | 435234  | 397321  | 409458  | 412036  | 358099  |
| 121334  | 125904  | 145031  | 143106  | 108316  | 95939   | 165838  | 97093   | 146531  | 122110  | 101499  | 89668   | 121789  | 72569   |
| 309877  | 586233  | 247328  | 684914  | 570488  | 240517  | 677823  | 552923  | 404208  | 240655  | 752533  | 751227  | 809449  | 334458  |
| 299357  | 259487  | 246947  | 230342  | 271280  | 329703  | 265343  | 240465  | 236623  | 312591  | 285833  | 395481  | 291019  | 255610  |
| 1283381 | 1238788 | 1179323 | 1242389 | 1167339 | 1139594 | 1145495 | 1240049 | 1353878 | 1155380 | 1175148 | 909366  | 1174562 | 1049411 |
| 295232  | 248435  | 267029  | 234087  | 273277  | 305504  | 259768  | 241382  | 236813  | 331027  | 299531  | 401112  | 289612  | 231126  |
| 817691  | 797847  | 736362  | 806913  | 695809  | 734550  | 735185  | 777416  | 852080  | 739685  | 769669  | 552980  | 758260  | 668871  |
| 216762  | 105907  | 195989  | 179411  | 138610  | NA      | 114172  | 243181  | 206144  | 189905  | 161145  | 118536  | 97161   | 81259   |
| 100848  | 83459   | 74612   | 76923   | 80072   | 110713  | 84071   | 86193   | 86653   | 96856   | 103989  | 132818  | 90256   | NA      |
| 117835  | 107362  | 100308  | 109848  | 103137  | 98972   | 99996   | 111125  | 122273  | 104127  | 104570  | NA      | 104451  | 94155   |
| 131835  | NA      | 77811   | 91859   | NA      | NA      | NA      | 161184  | 218298  | 130891  | 92662   | 209938  | 88481   | 212647  |
| 3591900 | 3180208 | 3044792 | 3093172 | 2682285 | 2651316 | 3603938 | 3211863 | 3909401 | 3210313 | 2684357 | 2766017 | 2133418 | NA      |
| 1687882 | 1738579 | 1871631 | 1542381 | 1606862 | 1759947 | 1467879 | 1895953 | 1897401 | 1742288 | 1633403 | 1698581 | 1533048 | 1713904 |
| 512308  | 530019  | 550368  | 484009  | 506242  | 555345  | 438759  | 561093  | 553673  | 547884  | 502062  | 536848  | 447176  | 502528  |
| 311108  | 386064  | 384251  | 349525  | 286108  | 273933  | 243758  | 337446  | 371906  | 246563  | 178407  | 160268  | 141897  | NA      |
| 201471  | 212038  | 196563  | 203744  | 211082  | 210453  | 176733  | 161731  | 139910  | 204297  | 202267  | 159427  | 193375  | 213165  |

|         |         |         |         |         |         |         |         |         |         |         |         |         |         |
|---------|---------|---------|---------|---------|---------|---------|---------|---------|---------|---------|---------|---------|---------|
| 1405520 | 1357622 | 1395867 | 1456917 | 1422788 | 1491554 | 1379082 | 1406447 | 1388137 | 1486728 | 1464602 | 1404902 | 1466060 | 1410336 |
| 1372860 | 1343230 | 1363151 | 1331021 | 1385613 | 1391701 | 1310388 | 1354486 | 1287051 | 1377850 | 1399164 | 1381147 | 1398219 | 1332886 |
| 431469  | 420943  | 402758  | 422554  | 419978  | 455777  | 407579  | 416450  | 423836  | 441659  | 421372  | 410687  | 407210  | 416512  |
| 87282   | 114368  | 89317   | 110388  | NA      | 105020  | 109026  | 103095  | 135707  | 103091  | 181685  | 133705  | 126616  | 122465  |
| 399445  | 194654  | 368211  | 502753  | 1288260 | 345521  | 279990  | 462664  | 269806  | 622559  | 515589  | 262929  | 720073  | 802167  |
| 285423  | 300115  | 317777  | 325898  | 420954  | 363655  | 290015  | 329403  | 334048  | 267072  | 303892  | 334350  | 301774  | 314273  |
| 1085422 | 1189003 | 1202105 | 1119726 | 887588  | 1163121 | 1176632 | 1200934 | 1182820 | 1209215 | 1365299 | 1256994 | 1239828 | 1231451 |
| 295647  | 303853  | 322433  | 349121  | 407122  | 366763  | 271021  | 322337  | 317749  | 278378  | 306245  | 339170  | 294906  | 311665  |
| 710720  | 752950  | 751827  | 711937  | 574654  | 749493  | 718234  | 769261  | 750699  | 781681  | 842720  | 791279  | 784637  | 760051  |
| 62599   | 168041  | 108843  | 112238  | 155152  | 130811  | 320156  | 94577   | 138875  | 115583  | 256711  | 196350  | 142145  | 86932   |
| 95426   | 101780  | 104005  | 101369  | 133955  | 117265  | 91550   | 97102   | 98756   | 88444   | 100980  | 107795  | 104493  | 98355   |
| 95989   | 113670  | 106289  | 95801   | NA      | 102851  | 105494  | 107035  | 109110  | 111257  | 113599  | 110384  | 113786  | 106215  |
| NA      | 198935  | 193858  | 122544  | 116763  | 149536  | 78334   | 113002  | 212075  | 192044  | 71322   | 172215  | 55973   | 68037   |
| 3979118 | 3602096 | 3229658 | 2988889 | 3482804 | 3191998 | 3121340 | 2856973 | 2891510 | 3080953 | 3948553 | 3862114 | 3874373 | 3546370 |
| 2020422 | 1963041 | 1786325 | 1680813 | 1809634 | 1857273 | 1788225 | 1880165 | 1930982 | 1828427 | 1917271 | 1935167 | 1627750 | 1739058 |
| 587684  | 583119  | 516951  | 524565  | 557187  | 583975  | 545868  | 562359  | 616641  | 581646  | 570944  | 570816  | 472340  | 530106  |
| 213999  | 287585  | 232212  | 204644  | 299980  | 368463  | 317648  | 290031  | 252875  | 391717  | 375405  | 291879  | 320450  | 492554  |
| 164883  | 167106  | 165780  | 167231  | 113463  | 156188  | 244012  | 142288  | 172616  | 153065  | 142742  | 202728  | 246699  | 170408  |

|         |         |         |         |         |         |         |         |         |         |         |         |         |         |
|---------|---------|---------|---------|---------|---------|---------|---------|---------|---------|---------|---------|---------|---------|
| 1530541 | 1540458 | 1496624 | 1301111 | 1231043 | 1432599 | 1612603 | 1469176 | 1425725 | 1317397 | 1398689 | 1359498 | 1454524 | 1473669 |
| 1505365 | 1419771 | 1389576 | 1289633 | 1140282 | 1354029 | 1469825 | 1370617 | 1405539 | 1275933 | 1364132 | 1372198 | 1392939 | 1395033 |
| 452946  | 453124  | 454402  | 395436  | 372790  | 410661  | 470533  | 425066  | 424363  | 402846  | 424108  | 427329  | 445035  | 433658  |
| 122740  | 112886  | 134252  | 141106  | 106303  | 96375   | 176948  | 143917  | 117635  | 114621  | 158663  | 113107  | 108923  | 137687  |
| 355626  | 296641  | 402839  | 215264  | 246656  | 928033  | 545393  | 273596  | 326325  | 740186  | 302936  | 282036  | 316225  | 710988  |
| 312372  | 204133  | 267871  | 260338  | 284938  | 357684  | 304358  | 299179  | 351260  | 333660  | 287324  | 353155  | 299535  | 298312  |
| 1302027 | 1157820 | 1225434 | 1166407 | 956179  | 954699  | 1282022 | 1156566 | 1155148 | 922435  | 1159833 | 1149859 | 1138494 | 1237082 |
| 307494  | 212831  | 287146  | 258862  | 289925  | 376316  | 311532  | 301844  | 361325  | 336207  | 283197  | 359139  | 309199  | 299090  |
| 839922  | 743632  | 786182  | 730638  | 618492  | 592680  | 811797  | 739485  | 744471  | 587769  | 698354  | 743706  | 712499  | 766964  |
| 99228   | NA      | 100325  | 73256   | 132112  | 92369   | 98977   | 184491  | NA      | 216189  | 126120  | 97225   | 95534   | 56955   |
| 105744  | NA      | 89213   | 83935   | NA      | 128219  | 101667  | 100309  | 117964  | 103735  | 86841   | 114364  | 103174  | 96290   |
| 123956  | 102249  | 100887  | 107136  | 92426   | NA      | 110872  | 103201  | 108319  | NA      | 100919  | 104069  | 100417  | 106263  |
| 132189  | 59287   | 261609  | 306325  | 236950  | 130088  | 195568  | 162875  | 221309  | 166350  | 200775  | 225280  | 245074  | 81042   |
| 3545796 | NA      | 3156583 | NA      | 2715921 | 3241557 | 3420241 | 3842520 | 4208720 | 3690160 | 3230081 | 3170145 | 2757703 | 2657887 |
| 2143162 | 1436252 | 1949147 | 1933322 | 1699602 | 2027959 | 1939827 | 1861526 | 2069192 | 1960609 | 1770727 | 1896630 | 1824930 | 1844362 |
| 604109  | 442989  | 606984  | 557141  | 529489  | 617287  | 588611  | 573038  | 621033  | 573894  | 517505  | 571689  | 550185  | 523972  |
| 422186  | 271287  | 257112  | NA      | 270109  | 302074  | 321498  | 351828  | 389511  | 371537  | 278914  | 323747  | 315406  | 266105  |
| 182008  | 92250   | 134521  | 142924  | 263409  | 176592  | 194400  | 170696  | 127122  | 82304   | 179422  | 113698  | 144085  | 131714  |

|         |         |         |         |         |         |         |         |         |         |         |         |         |         |
|---------|---------|---------|---------|---------|---------|---------|---------|---------|---------|---------|---------|---------|---------|
| 1453891 | 1505930 | 1533071 | 1442480 | 1344782 | 1306143 | 1501794 | 1513432 | 1317096 | 1460831 | 1465363 | 1410793 | 1339355 | 1446309 |
| 1349174 | 1432874 | 1429181 | 1361259 | 1287599 | 1253604 | 1389200 | 1444077 | 1320513 | 1371897 | 1348593 | 1350208 | 1318779 | 1344516 |
| 418991  | 431388  | 452220  | 421415  | 429499  | 381365  | 429851  | 433462  | 413104  | 416282  | 425437  | 417327  | 407660  | 444265  |
| 105991  | 133463  | 211532  | 108278  | 108307  | 114142  | 145223  | 134531  | 150469  | 80659   | 144128  | 94264   | 132176  | 156039  |
| 567893  | 616376  | 2225720 | 446260  | 284277  | 1366940 | 1317659 | 672008  | 302555  | 509638  | 771981  | 404070  | 276275  | 742613  |
| 367107  | 361200  | 316873  | 320933  | 320256  | 315740  | 285747  | 283989  | 269259  | 396637  | 249255  | 340403  | 314108  | 306658  |
| 1287852 | 1375580 | 1331075 | 1171119 | 1221264 | 791951  | 1163537 | 1289769 | 1167034 | 1218417 | 1309647 | 1199600 | 1187814 | 1173937 |
| 365201  | 370934  | 322153  | 314760  | 311147  | 333365  | 296484  | 285367  | 264060  | 373132  | 239808  | 340751  | 301433  | 274997  |
| 834391  | 895564  | 852062  | 751466  | 762067  | 513075  | 755308  | 816851  | 726839  | 791761  | 819883  | 768483  | 742961  | 741741  |
| 83458   | 66292   | 145500  | 136518  | 126841  | 82529   | 113048  | 161452  | 140017  | 63766   | 112628  | NA      | NA      | 83101   |
| 126906  | 115598  | 102629  | 106745  | 101158  | 107939  | 82405   | 90275   | 86591   | 122098  | 83364   | 114518  | 100349  | 96310   |
| 112190  | 114946  | 120729  | 104516  | 114940  | NA      | 101596  | 117490  | 104523  | 109588  | 117163  | 106125  | 106701  | 105056  |
| 92202   | 165555  | 129518  | 195648  | 159099  | NA      | NA      | 115622  | 194844  | 184332  | NA      | 90342   | 103429  | 181479  |
| 3404687 | 2811719 | 2608771 | 3708755 | 3505796 | 3897611 | 3021593 | 3971481 | 3736931 | 3666614 | 3057391 | 3231665 | 2988405 | 3051570 |
| 1888310 | 2069365 | 1880859 | 1855724 | 1957128 | 1744777 | 1626112 | 1586499 | 1744029 | 1947993 | 1557512 | 1885654 | 1917122 | 1837254 |
| 597396  | 632001  | 591684  | 579959  | 596870  | 496844  | 508300  | 485110  | 538296  | 586519  | 476484  | 572525  | 612775  | 566959  |
| 446140  | 469847  | 344152  | 333278  | 373293  | 228123  | 399710  | 381152  | 330464  | 385369  | 384219  | 307904  | 272163  | 327481  |
| 93590   | 114846  | 96720   | 176875  | 198135  | 84231   | 123092  | 185837  | 167669  | 124233  | 181219  | 119378  | 114913  | 181652  |

|    |          |         |         |         |         |         |         |         |         |         |         |         |         |
|----|----------|---------|---------|---------|---------|---------|---------|---------|---------|---------|---------|---------|---------|
| 70 | 175.0601 | 198046  | 155719  | 161405  | 210776  | 168915  | 72319   | 160194  | 131715  | 210136  | 257180  | 275261  | 254964  |
| 71 | 178.0499 | 379966  | 350130  | 586378  | 66715   | 834404  | 3442541 | 195572  | 318082  | 354632  | 272782  | NA      | 325749  |
| 72 | 179.0551 | 363767  | 280976  | 333344  | 506720  | 332473  | 104888  | 218308  | 128087  | 285539  | 307363  | 446251  | 430293  |
| 74 | 180.972  | 4917273 | 4878275 | 4903947 | 4688861 | 4882721 | 4926206 | 5178534 | 4619462 | 3905526 | 3930183 | 4298759 | 3968900 |
| 75 | 181.0376 | 1007325 | 932757  | 1211572 | 875017  | 1093856 | 828153  | 1164446 | 1035736 | 634410  | 731855  | 684563  | 780600  |
| 76 | 181.0358 | 161789  | 109379  | 104318  | 154834  | 146586  | 89394   | 63034   | 155234  | 90014   | 195498  | 75055   | 316148  |
| 77 | 181.965  | 131125  | 125401  | 130016  | 159112  | 165603  | NA      | NA      | 80377   | NA      | NA      | NA      | 74144   |
| 78 | 183.015  | 103182  | 118982  | 101077  | 110571  | 96478   | NA      | 107400  | 94036   | 55436   | 75477   | 96286   | 98134   |
| 79 | 183.0347 | 323319  | 304414  | 402187  | 289754  | 357701  | 263306  | 365381  | 338245  | 191155  | 228912  | 221987  | 246762  |
| 81 | 191.0188 | 630245  | 553063  | 334072  | 548651  | 846605  | 398037  | 410424  | 651918  | 1039879 | 1165267 | 969462  | 749561  |
| 82 | 195.8103 | 413410  | 353834  | 483194  | 491406  | 490077  | NA      | 425231  | 434081  | 177337  | 198259  | 345173  | 292946  |
| 83 | 196.8913 | 646680  | 701621  | 670474  | 631576  | 643875  | 496871  | 682951  | 709944  | 626226  | 629917  | 697936  | 591351  |
| 84 | 196.9461 | 162961  | 150905  | 145708  | 147645  | 133480  | 201439  | 203200  | 154272  | 115151  | 130516  | 115123  | 144982  |
| 85 | 197.8072 | 500910  | 419422  | 610437  | 618819  | 634276  | NA      | 526534  | 500080  | 211550  | 250958  | 386766  | 356803  |
| 86 | 198.8883 | 653237  | 694700  | 665982  | 613279  | 636116  | 520378  | 726532  | 709547  | 654340  | 655899  | 678529  | 572390  |
| 87 | 199.037  | 898436  | 952720  | 1316099 | 359821  | 196613  | NA      | 255679  | 1016179 | NA      | 91464   | 408019  | 857722  |
| 88 | 199.8042 | 234088  | 202942  | 281183  | 285068  | 293841  | NA      | 248824  | 225477  | 99132   | 110222  | 192964  | 153399  |

|         |         |         |         |         |         |         |         |         |         |         |         |         |         |
|---------|---------|---------|---------|---------|---------|---------|---------|---------|---------|---------|---------|---------|---------|
| 231644  | 284522  | 224031  | 256240  | 223256  | 212527  | 229775  | 199635  | 175227  | 234228  | 234923  | 194173  | 226495  | 245810  |
| 218166  | 460566  | 1027234 | 327798  | 354129  | 176338  | 200142  | 201394  | 260805  | 175919  | NA      | 115854  | NA      | NA      |
| 258307  | 305555  | 274211  | 310185  | 203923  | 384245  | 271591  | 331300  | 323210  | 207565  | 419120  | 242899  | 414709  | 413248  |
| 4591607 | 4507204 | 4887748 | 4269339 | 4523697 | 4988501 | 4178182 | 5036760 | 4908984 | 5111453 | 4481962 | 5338351 | 4374772 | 4692446 |
| 1057660 | 1143948 | 967715  | 987632  | 695935  | 864512  | 718121  | 1032189 | 1244255 | 712492  | 637211  | 850072  | 811872  | 823558  |
| 125783  | 83319   | NA      | 99404   | 153750  | 125986  | 91904   | 86965   | 91298   | 74414   | 81328   | 80908   | 75967   | NA      |
| 105305  | 77961   | NA      | 114199  | 86276   | NA      | NA      | NA      | 92197   | NA      | NA      | 82835   | NA      | NA      |
| 116609  | 95269   | 98510   | 106426  | 81238   | 94947   | 113342  | 101824  | 124143  | 108214  | 80365   | 70930   | 63959   | NA      |
| 349305  | 377163  | 298806  | 318173  | 223502  | 278186  | 242630  | 332799  | 400331  | 204761  | 203744  | 269353  | 244016  | 250753  |
| 376110  | 1182523 | 409803  | 926628  | 575758  | 635378  | 591991  | 979515  | 686996  | 467557  | 1193483 | 690254  | 963654  | 455940  |
| 538506  | 409142  | 539867  | 336744  | 339802  | 474333  | 278513  | 484241  | 563613  | 404957  | 233098  | 174450  | 252551  | 384631  |
| 678537  | 737208  | 523906  | 702183  | 652485  | 619050  | 729129  | 657110  | 664502  | 604440  | 664981  | 567713  | 680914  | 590865  |
| 123382  | 144417  | 128284  | 122180  | 151498  | 189614  | 144920  | 142945  | 134425  | 185444  | 146766  | 204173  | 137903  | 143593  |
| 685896  | 499223  | 687546  | 418078  | 439214  | 640775  | 333654  | 571350  | 682335  | 509960  | 305485  | 215443  | 333018  | 478005  |
| 666033  | 719605  | 533277  | 711332  | 649621  | 617155  | 721686  | 683644  | 669567  | 612385  | 667822  | 587558  | 709010  | 557528  |
| 1306033 | 823791  | 122047  | 1537987 | 178748  | 123129  | 164639  | 240431  | 996631  | NA      | 454607  | 570603  | 88349   | 239855  |
| 326406  | 238872  | 334768  | 183531  | 210755  | 291662  | 160327  | 253875  | 316608  | 249770  | 141737  | 95273   | 146000  | 228935  |

|         |         |         |         |         |         |         |         |         |         |         |         |         |         |
|---------|---------|---------|---------|---------|---------|---------|---------|---------|---------|---------|---------|---------|---------|
| 182431  | 214738  | 187773  | 225377  | 153039  | 181606  | 264421  | 206766  | 206471  | 199466  | 184936  | 225524  | 254036  | 227029  |
| 455248  | 94663   | 1236185 | 451487  | 194513  | 564471  | 134499  | 274039  | 355742  | 66755   | 300447  | 339654  | 184321  | 172164  |
| 246633  | 288060  | 305785  | 276570  | 277291  | 317318  | 231626  | 215184  | 388977  | 203744  | 213422  | 308611  | 366521  | 314437  |
| 5262188 | 5120260 | 5062460 | 4800003 | 5831678 | 5328454 | 4674488 | 5157193 | 5064142 | 4943072 | 5052022 | 5260055 | 4460859 | 4549309 |
| 1144972 | 999552  | 775934  | 549401  | 1212288 | 1028945 | 1060876 | 719322  | 814171  | 1103950 | 1225132 | 1222162 | 1058080 | 1426087 |
| 105330  | NA      | 98157   | 204486  | 145892  | 443522  | 172075  | 133328  | 185921  | 79539   | 82664   | 78221   | 73978   | 104009  |
| NA      | NA      | NA      | NA      | 113666  | 95291   | NA      | NA      | NA      | NA      | NA      | NA      | 77200   | 124261  |
| 135160  | 138003  | 100227  | 94080   | 101527  | 101966  | 104144  | 83007   | 97860   | 87678   | 134983  | 141263  | 114837  | 104433  |
| 373496  | 316927  | 251742  | 174714  | 404309  | 329181  | 337743  | 212894  | 261747  | 358955  | 395982  | 404918  | 327580  | 462443  |
| 497421  | 392750  | 617296  | 554875  | 451750  | 590181  | 646261  | 576326  | 577107  | 461741  | 603158  | 347070  | 1027233 | 1010430 |
| 547823  | 536044  | 480156  | 404654  | 420068  | 437366  | 484811  | 408292  | 417448  | 402650  | 489739  | 496356  | 135693  | 268879  |
| 565029  | 611247  | 609564  | 678864  | 548155  | 711303  | 604553  | 670565  | 675375  | 688734  | 684776  | 649504  | 855396  | 676831  |
| 214006  | 153443  | 152576  | 153663  | 227320  | 211515  | 156156  | 185053  | 189501  | 166299  | 163238  | 149970  | 111443  | 155861  |
| 690125  | 668343  | 549259  | 492984  | 430333  | 537585  | 594369  | 474737  | 518900  | 475814  | 561877  | 626332  | 165545  | 312520  |
| 574555  | 598769  | 642842  | 693536  | 580407  | 661465  | 625576  | 706641  | 644732  | 679901  | 683111  | 684567  | 913194  | 703298  |
| 130054  | 1960417 | NA      | NA      | 185828  | 66880   | 135056  | 62636   | 120657  | 669076  | 1958115 | 1825508 | 1195787 | 1069195 |
| 312310  | 311969  | 247869  | 224399  | 210059  | 261467  | 271614  | 221649  | 233309  | 215128  | 266430  | 269051  | 75399   | 137834  |



|         |         |         |         |         |         |         |         |         |         |         |         |         |         |
|---------|---------|---------|---------|---------|---------|---------|---------|---------|---------|---------|---------|---------|---------|
| 234339  | 129203  | 190145  | 169349  | 273049  | 180534  | 223526  | 193798  | 151698  | 86850   | 209550  | 129247  | 182273  | 158154  |
| NA      | 374306  | 74882   | 296878  | NA      | 178806  | 96767   | 183292  | 68815   | 444551  | 154435  | 72561   | 118055  | 496440  |
| 142565  | 172813  | 279319  | 353926  | 735723  | 296972  | 430050  | 381183  | 231316  | 371052  | 308894  | 264138  | 310843  | 430031  |
| 5453214 | 4347576 | 5134926 | 4991201 | 4679017 | 5891087 | 5023862 | 5100084 | 5903628 | 6047924 | 5004934 | 5565316 | 4974682 | 4876120 |
| 1276453 | 900552  | 952786  | 1474948 | 783056  | 1168673 | 948186  | 1190622 | 1414610 | 1117626 | 956890  | 1207679 | 1108745 | 817095  |
| 95472   | NA      | 117180  | NA      | 97239   | 70167   | 176378  | 123617  | 78153   | 111017  | 89970   | 104474  | 95653   | 183421  |
| NA      | 61832   | NA      | 130631  | 102825  | 123510  | 177671  | 167288  | 129747  | 196346  | 113407  | 143919  | 87528   | 160023  |
| 106627  | NA      | 92205   | NA      | 83114   | 99671   | 98890   | 129146  | 146723  | 131433  | 97597   | 121237  | 78964   | 74728   |
| 409250  | 291206  | 313268  | 469427  | 238040  | 376436  | 312972  | 395705  | 463267  | 359360  | 293330  | 387885  | 355416  | 262049  |
| 567109  | 778695  | 691312  | NA      | 589301  | 676834  | 680942  | 527485  | 529200  | 225456  | 430005  | 240747  | 452194  | 608028  |
| 496513  | 118085  | 477108  | 611423  | 397603  | 509407  | 371179  | 494376  | 534618  | 493221  | 505814  | 537453  | 450898  | 369458  |
| 720630  | 863666  | 657478  | 543103  | 538794  | 549809  | 753364  | 605993  | 596934  | 437375  | 600473  | 635152  | 686936  | 729525  |
| 155549  | 124537  | 152777  | 162763  | 136902  | 200849  | 164932  | 177912  | 179568  | 189527  | 135065  | 163551  | 140592  | 143402  |
| 568608  | 154200  | 569311  | 728918  | 501177  | 599391  | 461629  | 622634  | 583560  | 560256  | 613796  | 609499  | 565986  | 462138  |
| 733258  | 890910  | 659776  | 538714  | 518001  | 573226  | 760192  | 631477  | 619851  | 435822  | 620944  | 633322  | 671601  | 744058  |
| 1526095 | 626556  | 2179923 | 1356992 | 69367   | 1385114 | 1548896 | 1180255 | 1179072 | 1356477 | 465367  | 1826940 | 1074359 | 1476345 |
| 268236  | NA      | 254827  | 336677  | 219948  | 284666  | 201047  | 270974  | 304764  | 273468  | 277599  | 266752  | 261957  | 201989  |

|         |         |         |         |         |         |         |         |         |         |         |         |         |         |
|---------|---------|---------|---------|---------|---------|---------|---------|---------|---------|---------|---------|---------|---------|
| 102095  | 136660  | 132219  | 208284  | 269895  | 117372  | 185485  | 220201  | 206160  | 153001  | 213742  | 142350  | 142725  | 208064  |
| 236697  | 1719374 | 496015  | 558653  | 180764  | 132420  | 238925  | 54100   | 251170  | 331663  | 356508  | 326306  | 153294  | NA      |
| 347116  | 324769  | 428518  | 415015  | 429516  | 215640  | 342237  | 242711  | 246792  | 281909  | 410016  | 338851  | 503209  | 312301  |
| 4999589 | 5247745 | 5078096 | 5133921 | 5116275 | 6313473 | 4886717 | 4568503 | 4960498 | 5174842 | 4274840 | 5364115 | 5401885 | 5062201 |
| 1109005 | 1398860 | 859846  | 1415859 | 1097445 | 1192669 | 1116974 | 1099756 | 1088634 | 958426  | 901036  | 1003063 | 1128834 | 1031949 |
| 142842  | 145609  | 156087  | 157173  | 116927  | NA      | 103601  | 124748  | 112950  | 131899  | 146776  | 94903   | 149085  | 72749   |
| 174361  | 167246  | 187170  | 157816  | 103831  | 113633  | 141457  | 117579  | 101366  | 130088  | 180739  | 127815  | 202299  | 135097  |
| 105254  | 79805   | 76691   | 112693  | 113975  | 135900  | 76563   | 118910  | 153912  | 107668  | 86062   | 94800   | 108723  | 90166   |
| 359170  | 454693  | 272182  | 448449  | 350746  | 375167  | 368047  | 346832  | 343981  | 300795  | 295125  | 318335  | 358006  | 348782  |
| 562861  | 630330  | 696816  | 325559  | 514744  | 264235  | 930505  | 449881  | 212663  | 607743  | 954825  | 483439  | 685932  | 424641  |
| 382102  | 392959  | 381877  | 497880  | 497120  | 446434  | 297343  | 278207  | 581339  | 360823  | 284792  | 468229  | 653418  | 344107  |
| 667832  | 668822  | 703093  | 637848  | 730197  | 465866  | 715410  | 723655  | 620070  | 613027  | 728578  | 656042  | 563182  | 689000  |
| 157543  | 165827  | 155091  | 144669  | 133842  | 211879  | 159874  | 120854  | 163545  | 181968  | 109614  | 152320  | 172345  | 153901  |
| 449072  | 444509  | 497676  | 542182  | 618250  | 538160  | 361064  | 326557  | 668948  | 441904  | 321275  | 553141  | 792591  | 411723  |
| 693442  | 688766  | 727741  | 640585  | 673503  | 482107  | 714923  | 754331  | 619807  | 646974  | 739808  | 677729  | 573183  | 675528  |
| 2494805 | 581754  | 333091  | 1215815 | 1695288 | 1128659 | 673273  | 1009514 | 1221470 | 1320469 | 1524125 | 1661244 | 750518  | 1176702 |
| 205186  | 215427  | 225158  | 265391  | 302402  | 223651  | 171449  | 143925  | 315418  | 201359  | 145528  | 256213  | 358618  | 194824  |

|     |          |          |          |          |          |          |          |          |          |          |          |          |          |
|-----|----------|----------|----------|----------|----------|----------|----------|----------|----------|----------|----------|----------|----------|
| 89  | 200.8853 | 201954   | 220853   | 213299   | 205000   | 203600   | 148759   | 210591   | 210071   | 196734   | 192960   | 208198   | 182569   |
| 90  | 201.0341 | 349340   | 303182   | 419483   | 115402   | NA       | NA       | 76774    | 303850   | NA       | NA       | 119425   | 269149   |
| 92  | 202.9969 | 114813   | 112139   | 131757   | 129125   | 129282   | NA       | 110644   | 118686   | 79166    | 93703    | 101945   | 104907   |
| 94  | 203.0817 | 124462   | 99134    | 110456   | 99317    | 135712   | NA       | 121003   | 84548    | 99300    | 114642   | 136489   | 106604   |
| 95  | 208.8445 | 932629   | 964705   | 956396   | 890183   | 986458   | 872425   | 988147   | 949556   | 891568   | 901733   | 928965   | 847968   |
| 96  | 209.0659 | 735455   | 742041   | 858813   | 243963   | 130366   | 150524   | 198497   | 823871   | NA       | 72976    | 346608   | 709589   |
| 97  | 210.0644 | 176424   | 88817    | 186520   | 77592    | 327294   | 408997   | 171833   | 320538   | NA       | NA       | 91177    | 58549    |
| 98  | 210.8415 | 1190184  | 1262077  | 1234446  | 1165792  | 1242984  | 1115079  | 1218943  | 1239127  | 1119091  | 1117892  | 1160432  | 1078369  |
| 99  | 212.8385 | 569351   | 603450   | 583748   | 544451   | 592894   | 493087   | 604769   | 590977   | 512494   | 542659   | 575647   | 499595   |
| 100 | 213.0258 | 1188438  | 1544285  | 1232915  | 1681365  | 1518614  | NA       | 981412   | 1114100  | 531638   | 908405   | 1466387  | 1380113  |
| 101 | 215.0321 | 22610489 | 15607595 | 18867728 | 21863921 | 16779964 | 20412419 | 29328685 | 22954626 | 31012610 | 28489509 | 22574031 | 19776491 |
| 102 | 217.029  | 7146815  | 4942078  | 5839298  | 7069974  | 5238197  | 6534917  | 9060359  | 7562780  | 9655188  | 8719806  | 7366427  | 6120192  |
| 106 | 223.0677 | 567238   | 690630   | 541320   | 512904   | 558932   | 552643   | 537006   | 682836   | 250274   | 385670   | 544180   | 556877   |
| 107 | 225.0608 | 774985   | 500514   | 333783   | 421533   | 346663   | 1391016  | 942269   | 823649   | 2464791  | 2053617  | 941057   | 943383   |
| 108 | 228.9023 | 677768   | 715013   | 741272   | 736911   | 715478   | 541904   | 702325   | 667379   | 554430   | 570931   | 596926   | 610515   |
| 109 | 230.8994 | 426250   | 436293   | 457719   | 446862   | 456661   | 343734   | 428494   | 415826   | 347981   | 363675   | 379892   | 390238   |
| 110 | 231.9671 | 735882   | 694285   | 718684   | 863525   | 762488   | 427712   | 663618   | 370646   | 573676   | 598351   | 728379   | 675857   |
| 111 | 232.0508 | 121517   | 167770   | 134941   | 85281    | 123629   | NA       | NA       | 109612   | NA       | NA       | 91028    | 97864    |

|          |          |          |          |          |          |          |          |          |          |          |          |          |          |
|----------|----------|----------|----------|----------|----------|----------|----------|----------|----------|----------|----------|----------|----------|
| 217323   | 228165   | 160356   | 213167   | 207450   | 190088   | 221354   | 202833   | 208749   | 189173   | 204619   | 173790   | 206620   | 185563   |
| 426786   | 261056   | NA       | 483673   | NA       | NA       | NA       | 74723    | 310531   | NA       | 134273   | 176313   | NA       | 70948    |
| 137401   | 116693   | 129744   | 104285   | 115341   | 117306   | 112979   | 101717   | 123644   | 119358   | 94739    | 91193    | 90422    | NA       |
| 107234   | 91409    | 227221   | 162719   | 153209   | 86668    | 91884    | 125838   | 101137   | 113569   | 117035   | 103703   | 117352   | 131979   |
| 943883   | 1012118  | 829790   | 932950   | 867029   | 908486   | 955854   | 984399   | 995759   | 906712   | 881087   | 899932   | 892012   | 793350   |
| 862874   | 578231   | 83006    | 1358934  | 139966   | 84771    | 152232   | 162241   | 760407   | NA       | 386103   | 421689   | 74258    | 171422   |
| 202085   | 65656    | 360717   | 209708   | 142540   | NA       | 218484   | 234334   | 122658   | 167755   | 116060   | 63491    | 120381   | 109431   |
| 1228659  | 1300522  | 1047401  | 1230357  | 1129739  | 1172006  | 1209511  | 1197277  | 1208439  | 1136474  | 1183071  | 1128986  | 1190676  | 1023926  |
| 567865   | 606782   | 503757   | 579366   | 531828   | 557477   | 581428   | 595871   | 612449   | 573074   | 562545   | 550987   | 573820   | 482270   |
| 1803000  | 1263284  | 1044176  | 1346037  | 892288   | 795245   | 1517606  | 1103255  | 1657289  | 1042217  | 935718   | 713282   | 459260   | NA       |
| 16655571 | 20995031 | 31374470 | 16876976 | 35667677 | 34950649 | 25508443 | 23240768 | 20505653 | 41548584 | 26624772 | 36794938 | 26077273 | 31597169 |
| 5275322  | 6591664  | 10127247 | 5203965  | 11031593 | 10953675 | 7886249  | 7290932  | 6433557  | 13078624 | 8634827  | 11314286 | 8419430  | 10262391 |
| 505029   | 601325   | 408047   | 589798   | 420880   | 381606   | 575554   | 570244   | 632669   | 360305   | 427602   | 445531   | 423038   | 367102   |
| 297733   | 897693   | 576447   | 627320   | 1974557  | 947054   | 1369470  | 674467   | 473651   | 1060778  | 1814417  | 1422781  | 2159804  | 907059   |
| 690701   | 684933   | 708525   | 633106   | 645341   | 705655   | 597339   | 735248   | 772750   | 668893   | 630449   | 573695   | 572583   | 626369   |
| 419728   | 429657   | 451731   | 391551   | 401888   | 427249   | 385515   | 468196   | 473403   | 426223   | 392685   | 361435   | 367386   | 397991   |
| 583138   | 664261   | 745562   | 610442   | 521755   | 831000   | 595411   | 819266   | 846314   | 658076   | 759353   | 413039   | 739770   | 738413   |
| 178427   | 102812   | 62054    | 108046   | NA       | NA       | 68509    | 90070    | 130924   | NA       | NA       | NA       | NA       | NA       |

|          |          |          |          |          |          |          |          |          |          |          |          |          |          |
|----------|----------|----------|----------|----------|----------|----------|----------|----------|----------|----------|----------|----------|----------|
| 176819   | 190692   | 188669   | 216421   | 176132   | 219606   | 193269   | 213254   | 208405   | 214861   | 206805   | 202078   | 270680   | 205175   |
| NA       | 605797   | NA       | 211159   | 622769   | 576949   | 361711   | 329188   |
| 115317   | 128027   | 119100   | 100104   | 102590   | 113430   | 133690   | 101033   | 114620   | 112183   | 134784   | 127536   | 98158    | 111057   |
| 102630   | 133873   | 103248   | 96639    | NA       | 104040   | 144081   | 99957    | 98921    | 149665   | 145759   | 134279   | 203744   | 112028   |
| 882167   | 911914   | 939098   | 981251   | 887859   | 929462   | 902943   | 965909   | 906514   | 987054   | 981764   | 976560   | 1091809  | 975796   |
| NA       | 1399479  | NA       | NA       | 152176   | NA       | 90151    | NA       | 92241    | 554750   | 1483149  | 1363399  | 1191610  | 915693   |
| 231694   | 187066   | NA       | 145015   | 118945   | 219956   | 169650   | 118707   | 139299   | 221614   | 190011   | 123310   | 162584   | 194689   |
| 1105571  | 1132158  | 1139483  | 1252579  | 1091491  | 1257742  | 1122590  | 1208442  | 1199832  | 1277362  | 1261560  | 1229395  | 1374850  | 1232579  |
| 540548   | 564121   | 565088   | 595557   | 501932   | 566904   | 539002   | 592998   | 563971   | 607456   | 611701   | 617464   | 664940   | 599490   |
| 1596410  | 1405174  | 1191034  | 873184   | 868282   | 1048930  | 1205633  | 774822   | 999942   | 926051   | 1767129  | 1564632  | 1554064  | 1406578  |
| 37144928 | 22446079 | 35012471 | 35692197 | 21630403 | 25319059 | 27438897 | 30112634 | 34986393 | 18971433 | 18963249 | 23013573 | 14662875 | 17857816 |
| 11762438 | 7191860  | 10840862 | 10993870 | 6747736  | 8236515  | 8460088  | 9225116  | 11474689 | 5995228  | 5800865  | 7145425  | 4955159  | 5531009  |
| 493483   | 516032   | 461058   | 407014   | 540332   | 508137   | 473929   | 497456   | 380915   | 675266   | 724841   | 548102   | 845748   | 737970   |
| 1040903  | 341140   | 1143972  | 1554198  | 607789   | 707826   | 739150   | 962537   | 773884   | 604512   | 490863   | 461996   | 876768   | 753194   |
| 706697   | 735999   | 700571   | 623868   | 573643   | 695495   | 655762   | 687512   | 781011   | 721647   | 716278   | 740680   | 668557   | 693928   |
| 424944   | 458526   | 436058   | 406580   | 380957   | 452034   | 414860   | 436206   | 475201   | 431827   | 464089   | 467766   | 425021   | 420577   |
| 747613   | 800698   | 742323   | 672017   | 842999   | 761437   | 607675   | 612967   | 784640   | 519167   | 599742   | 783470   | 724229   | 709205   |
| 96651    | 172226   | 100093   | NA       | 96019    | 124150   | NA       | NA       | 69483    | 137807   | 135999   | 126487   | 92085    | 131142   |

|          |          |          |          |          |          |          |          |          |          |          |          |          |          |
|----------|----------|----------|----------|----------|----------|----------|----------|----------|----------|----------|----------|----------|----------|
| 220855   | 274602   | 208660   | 164480   | 176728   | 178329   | 233146   | 198905   | 183865   | 141867   | 195452   | 201881   | 214021   | 239180   |
| 475017   | 185902   | 702469   | 412575   | NA       | 433744   | 495472   | 380893   | 368510   | 425442   | 145888   | 560306   | 349006   | 466998   |
| 129699   | NA       | 111843   | NA       | 103218   | 101699   | 119476   | 118154   | 137247   | 130832   | 129550   | 114301   | 111100   | 106357   |
| 182104   | 182442   | 133630   | 117106   | 142436   | 162969   | 109961   | 132064   | 94459    | 111824   | 135883   | 148981   | 125930   | 105875   |
| 1039277  | 1140435  | 948433   | 842346   | 738531   | 902529   | 1063181  | 919236   | 953710   | 781618   | 948333   | 936598   | 928364   | 1010444  |
| 1128864  | 964928   | 1698965  | 958453   | NA       | 1113413  | 1304179  | 855829   | 884272   | 1025822  | 327779   | 1388407  | 782729   | 1203573  |
| 210114   | 118990   | 149810   | 264642   | NA       | 192413   | 146880   | 246843   | 206667   | 233037   | 135575   | 181176   | 253426   | 148718   |
| 1322190  | 1399430  | 1242476  | 1080607  | 987402   | 1155196  | 1382095  | 1222431  | 1166517  | 1030117  | 1173327  | 1151303  | 1210486  | 1325414  |
| 667224   | 637514   | 589789   | 520246   | 447140   | 562859   | 640989   | 576142   | 530420   | 490126   | 546721   | 568522   | 560941   | 629943   |
| 1262556  | NA       | 985191   | NA       | 881190   | 832556   | 1141166  | 1700109  | 1568082  | 1202375  | 1293889  | 923189   | 841076   | 674091   |
| 19775137 | 17936529 | 18893285 | 19701078 | 35605063 | 18014866 | 17068232 | 21228151 | 17071064 | 17972871 | 21999058 | 18279045 | 17356576 | 21194430 |
| 6245355  | 5906203  | 5906707  | 6335489  | 11824742 | 5617528  | 5373255  | 6562372  | 5487717  | 5892610  | 6832240  | 5965787  | 5587644  | 6641918  |
| 715043   | 663660   | 617832   | 605797   | 361644   | 593629   | 681547   | 578774   | 628358   | 595701   | 602223   | 571462   | 560238   | 700419   |
| 436656   | 1444357  | 377242   | 317658   | 1067309  | 427620   | 476172   | 407929   | 293352   | 313485   | 468159   | 229323   | 340990   | 888650   |
| 791329   | 665127   | 729824   | 693514   | 633539   | 619028   | 734317   | 670181   | 740077   | 635388   | 663928   | 762095   | 650200   | 698286   |
| 508940   | 418338   | 456719   | 448808   | 397674   | 393815   | 443257   | 416888   | 470875   | 390291   | 429506   | 449757   | 424600   | 419949   |
| 453957   | 453084   | 709135   | 915829   | 965568   | 779140   | 857179   | 865559   | 714643   | 979440   | 701596   | 833172   | 677515   | 760253   |
| 134100   | 75721    | 115035   | 174677   | 75722    | 190016   | 104918   | 153673   | 166709   | 156576   | 111332   | 174661   | 156109   | NA       |

|          |          |          |          |          |          |          |          |          |          |          |          |          |          |
|----------|----------|----------|----------|----------|----------|----------|----------|----------|----------|----------|----------|----------|----------|
| 212410   | 205719   | 219636   | 200949   | 225371   | 149164   | 230160   | 229854   | 187188   | 203402   | 222000   | 212650   | 170561   | 216519   |
| 786648   | 180704   | 97585    | 367844   | 546311   | 355741   | 212179   | 321353   | 373720   | 410473   | 482278   | 526360   | 228642   | 372876   |
| 125551   | 102522   | 103692   | 141280   | 135213   | 110037   | 97271    | 128570   | 133438   | 115356   | 106858   | 108991   | 104496   | 109589   |
| 114386   | 120173   | 100954   | 172048   | 134736   | 100893   | 129380   | 131125   | 158011   | 74510    | 141173   | 86072    | 109383   | 122193   |
| 978725   | 964125   | 1004357  | 919928   | 889630   | 818086   | 1020986  | 1044791  | 909338   | 932546   | 1023864  | 947781   | 865995   | 949933   |
| 1874528  | 419899   | 243943   | 902306   | 1215007  | 981744   | 659876   | 871179   | 853880   | 1070275  | 1291065  | 1170830  | 534972   | 991071   |
| 172165   | 210588   | 116615   | 163487   | 156337   | 180719   | 261344   | 147233   | 226456   | 139201   | 109276   | 101762   | 104442   | 196827   |
| 1233464  | 1242573  | 1302160  | 1166222  | 1224976  | 1000639  | 1280606  | 1314929  | 1119175  | 1219360  | 1294671  | 1224822  | 1082473  | 1256960  |
| 582116   | 618999   | 639803   | 601451   | 553938   | 494433   | 603136   | 650376   | 552717   | 565043   | 598981   | 594339   | 524585   | 590435   |
| 1202468  | 675550   | 679252   | 1591793  | 1486787  | 1210499  | 923600   | 1725159  | 1652120  | 1373350  | 1126921  | 981562   | 910236   | 922344   |
| 15224391 | 16426448 | 13409099 | 15347774 | 17537707 | 17693904 | 16264967 | 18487993 | 18713105 | 22004383 | 14859997 | 15101171 | 18392136 | 18197517 |
| 4677355  | 5054784  | 4182263  | 5027646  | 5859835  | 5639278  | 5016769  | 5733729  | 5999445  | 6747863  | 4535151  | 4727229  | 5848333  | 5839464  |
| 650215   | 689295   | 627820   | 671482   | 640508   | 595221   | 708983   | 655047   | 566100   | 647510   | 650736   | 652805   | 655029   | 684191   |
| 440258   | 386559   | 322595   | 345930   | 308415   | 356485   | 709905   | 706430   | 290394   | 659511   | 501623   | 385597   | 322616   | 522555   |
| 699399   | 773646   | 734161   | 697270   | 760133   | 510876   | 647094   | 646538   | 712543   | 693285   | 640048   | 714423   | 755126   | 717618   |
| 466442   | 487883   | 467173   | 453151   | 464779   | 324819   | 416208   | 415438   | 443428   | 452542   | 416368   | 435517   | 481378   | 445279   |
| 789757   | 693094   | 903612   | 857801   | 873016   | 780533   | 702897   | 606479   | 745660   | 722645   | 723745   | 776706   | 1082991  | 701644   |
| 154957   | 109014   | 122598   | 138298   | 163780   | 159512   | 109111   | 115436   | 195517   | 128257   | 80981    | 117116   | 118917   | 69306    |

|     |          |         |         |         |         |         |         |         |         |         |         |         |         |
|-----|----------|---------|---------|---------|---------|---------|---------|---------|---------|---------|---------|---------|---------|
| 113 | 235.9257 | 103227  | 101057  | 92325   | 89366   | 78057   | 80841   | 119853  | NA      | 86747   | 93231   | 91166   | 93347   |
| 114 | 235.9256 | 181972  | 182824  | 182255  | 154468  | 178420  | NA      | 152798  | 138167  | 175892  | 176972  | 171483  | 206131  |
| 115 | 238.9312 | 1001930 | 978155  | 1009403 | 962640  | 993456  | 968359  | 1087485 | 981940  | 759671  | 774171  | 866390  | 826484  |
| 116 | 238.9968 | 142991  | 129128  | 183701  | 152639  | 164988  | 83173   | 163175  | 146437  | 88029   | 106757  | 112409  | 120407  |
| 117 | 239.092  | 647088  | 228566  | 1369820 | 57572   | 330529  | NA      | 119912  | 716466  | 245315  | 276467  | 164881  | 615075  |
| 118 | 240.9284 | 302146  | 292766  | 300710  | 274269  | 312694  | 288090  | 333386  | 287147  | 223150  | 239256  | 274796  | 241602  |
| 119 | 240.9938 | 98869   | 81956   | 118939  | 92298   | 109025  | NA      | 106873  | 103386  | NA      | NA      | 74269   | 75957   |
| 120 | 243.0619 | 104410  | 115894  | 103034  | 195614  | 161166  | 701259  | NA      | 149879  | 72165   | 55671   | 102174  | 119134  |
| 121 | 243.9677 | 284490  | 285468  | 295895  | 372165  | 314881  | 140312  | 224632  | 128643  | 234124  | 210981  | 334901  | 297531  |
| 122 | 247.9622 | 130710  | 80441   | 73377   | 104899  | 112787  | NA      | 108807  | 97282   | 183343  | 233387  | 206180  | 245724  |
| 123 | 248.96   | 3378804 | 3346741 | 3369591 | 3167486 | 3327145 | 3415289 | 3609866 | 3105434 | 2792125 | 2826941 | 2876150 | 2787219 |
| 124 | 249.0876 | 290161  | 257601  | 286402  | 257967  | 332284  | 130414  | 298129  | 211012  | 238347  | 261875  | 318476  | 261893  |
| 125 | 258.9819 | 91157   | NA      | 97264   | NA      | NA      | 96106   | 113931  | 91893   | NA      | 72032   | 59441   | NA      |
| 127 | 263.1034 | 418391  | 655177  | 198616  | 505357  | 227325  | 5830298 | 408221  | 1236368 | 281524  | 136089  | 204287  | 343565  |
| 128 | 264.9341 | 163942  | 148867  | 144402  | 147451  | 122104  | 185793  | 211086  | 166830  | 124668  | 133080  | 122623  | 140675  |
| 129 | 264.9883 | 254482  | 173763  | 389679  | 607376  | 585618  | NA      | 264130  | 361591  | NA      | 59495   | 183807  | 125895  |
| 130 | 266.8037 | 534709  | 567828  | 541100  | 505439  | 542620  | 482052  | 573230  | 552250  | 502717  | 501260  | 532831  | 478937  |



|         |         |         |         |         |         |         |         |         |         |         |         |         |         |
|---------|---------|---------|---------|---------|---------|---------|---------|---------|---------|---------|---------|---------|---------|
| 97139   | 92744   | 118217  | 106042  | 97070   | 101749  | 83468   | 93473   | 112993  | 103117  | 104427  | 78558   | 102176  | 92645   |
| 215951  | 191891  | 229925  | 163784  | 205187  | 203791  | 128084  | 204331  | 182437  | 212304  | 137561  | 137597  | 129875  | 163871  |
| 900216  | 918208  | 1016895 | 832689  | 915113  | 1024769 | 849159  | 1028164 | 993851  | 1026221 | 890527  | 1060093 | 853172  | 902493  |
| 160283  | 179563  | 131395  | 152372  | 106547  | 130682  | 95745   | 157812  | 165444  | 100680  | 82230   | 108864  | 102480  | 116047  |
| 92662   | 1811088 | 75937   | 84754   | 221509  | 373334  | 304297  | 91241   | 922651  | 107811  | 201751  | 195832  | NA      | NA      |
| 271462  | 265453  | 309318  | 265418  | 278179  | 312753  | 240482  | 301607  | 311880  | 295125  | 296804  | 334429  | 258153  | 275536  |
| 102087  | 111520  | 89175   | 99047   | NA      | 85057   | 63139   | 106852  | 109144  | NA      | NA      | NA      | NA      | NA      |
| 126575  | 146460  | 83913   | 89476   | 74226   | 72037   | 150743  | 87927   | 112876  | 74460   | 96508   | NA      | 60348   | 72997   |
| 230941  | 259658  | 226306  | 246080  | 215341  | 335239  | 218086  | 319063  | 326095  | 192859  | 290345  | 261776  | 233429  | 307419  |
| 189994  | 160019  | 186013  | 144109  | 104765  | 156370  | 158598  | 142748  | 134382  | 261143  | 186301  | 129392  | 68632   | 141344  |
| 3087221 | 3136451 | 3177675 | 3054775 | 3103667 | 3389183 | 2967039 | 3474122 | 3375179 | 3467244 | 3041430 | 3620593 | 2989966 | 2999472 |
| 278912  | 235800  | 462620  | 363898  | 358285  | 225701  | 217560  | 295300  | 254835  | 266425  | 283489  | 271854  | 256432  | 329874  |
| NA      | 86200   | 98454   | 90392   | 105611  | 91522   | 114257  | 67102   | 93631   | 63115   | 80050   | 177323  | 64782   | 127457  |
| 397299  | 699352  | 628025  | 364303  | 169944  | 685288  | 910749  | 402746  | 145940  | 507305  | 92110   | 197979  | NA      | 125239  |
| 124232  | 152437  | 138913  | 121073  | 154706  | 180160  | 137374  | 141714  | 140516  | 184634  | 142787  | 207807  | 126773  | 148101  |
| 380246  | 130002  | 95822   | 107688  | 129854  | 133728  | 91146   | 292881  | 416346  | 174614  | 73750   | 202578  | NA      | NA      |
| 532968  | 566184  | 459201  | 558152  | 515962  | 506934  | 581923  | 550676  | 537448  | 514733  | 546600  | 519817  | 546450  | 448668  |

|         |         |         |         |         |         |         |         |         |         |         |         |         |         |
|---------|---------|---------|---------|---------|---------|---------|---------|---------|---------|---------|---------|---------|---------|
| 96600   | 122061  | 97368   | 70023   | 103350  | 112744  | 97333   | 83193   | 111416  | NA      | 94403   | 140712  | 108790  | 107124  |
| 201729  | 194007  | 139926  | 177238  | 213247  | 189560  | 265441  | 129392  | 156631  | 142825  | 207392  | 163871  | 202787  | 176089  |
| 1101091 | 1100243 | 1007497 | 980170  | 1151178 | 966827  | 1015985 | 1043391 | 1004647 | 986045  | 1047885 | 1053541 | 920331  | 983494  |
| 145012  | 159318  | 105512  | NA      | 135807  | 169083  | 166671  | 94848   | 127373  | 170216  | 185894  | 167966  | 166431  | 207598  |
| 1300117 | 491802  | NA      | 971246  | 67364   | 531812  | 229306  | 404305  | NA      | 395095  | 101645  | 778953  | 288646  | 64657   |
| 332620  | 349179  | 295694  | 283597  | 346261  | 293105  | 301784  | 326782  | 303663  | 296380  | 328725  | 327005  | 272589  | 285504  |
| 95618   | 101410  | NA      | NA      | 86322   | 105202  | 105465  | NA      | NA      | 111821  | 118290  | 114290  | 106411  | 134473  |
| 146420  | 106239  | 93376   | 84797   | 74627   | 167817  | 88361   | NA      | 75535   | 92506   | 84415   | 62561   | 116187  | 94673   |
| 237179  | 247626  | 297940  | 276709  | 308319  | 285771  | 226792  | 200850  | 320304  | 209927  | 226086  | 269746  | 224258  | 273449  |
| 136781  | 110310  | 159106  | 217591  | 84653   | 106142  | 269049  | 133345  | 127368  | 76540   | 137884  | 114522  | 120087  | 92634   |
| 3581625 | 3472065 | 3458103 | 3341954 | 3960457 | 3465276 | 3143055 | 3512867 | 3297465 | 3416821 | 3511846 | 3657356 | 3349837 | 3160086 |
| 255783  | 304614  | 260278  | 242766  | 187300  | 262705  | 331169  | 253460  | 264993  | 364283  | 359054  | 318225  | 353480  | 281498  |
| 100070  | 68559   | 120131  | 100069  | 94171   | 79984   | 65856   | 66833   | 101950  | 69307   | 67456   | 71677   | 62471   | 66070   |
| 468218  | 739495  | NA      | 544957  | 228591  | 456866  | 323458  | 413486  | 159425  | 119687  | 207086  | 274010  | 132934  | 134321  |
| 198649  | 156186  | 155627  | 157652  | 219363  | 222158  | 161591  | 181850  | 194139  | 163685  | 177649  | 150272  | 119149  | 161131  |
| 390638  | 129177  | 406647  | 197944  | 285906  | 427048  | 430218  | 172694  | 225802  | 239456  | 300627  | 155458  | 54852   | 92294   |
| 490456  | 508941  | 505488  | 558028  | 495808  | 533874  | 490808  | 548510  | 531437  | 561142  | 570342  | 566425  | 677245  | 559986  |

|         |         |         |         |         |         |         |         |         |         |         |         |         |         |
|---------|---------|---------|---------|---------|---------|---------|---------|---------|---------|---------|---------|---------|---------|
| 95934   | 82639   | 94746   | 109080  | 123017  | 129560  | 89945   | 115822  | 111251  | 142700  | 129611  | 143871  | 106007  | 102217  |
| 219391  | NA      | 177301  | NA      | 240446  | 219815  | 158157  | 189627  | 219073  | 203744  | 182867  | 171426  | 149544  | 155098  |
| 1175677 | 972194  | 1110037 | 1070920 | 943475  | 1280023 | 1034834 | 1117998 | 1222118 | 1200027 | 1015892 | 1094615 | 1018483 | 1058729 |
| 181336  | 126813  | 146932  | 199661  | 119151  | 152392  | 136063  | 170057  | 197881  | 133042  | 130621  | 161358  | 170033  | 121281  |
| 2484650 | 1431132 | 232892  | NA      | 812938  | 4574160 | 1224554 | 2580812 | 1585016 | 165196  | 954693  | 103514  | 155725  | 330501  |
| 348649  | 303925  | 343298  | 316654  | 289419  | 375609  | 314531  | 330415  | 362405  | 355842  | 294886  | 324457  | 296995  | 330256  |
| 128242  | 82972   | 96017   | 128127  | NA      | 99050   | 87766   | 110578  | 127772  | 88057   | 82876   | 112780  | 107356  | 81986   |
| 72718   | 68284   | 109907  | 125951  | 66499   | 71504   | 67348   | 86572   | 71989   | 81472   | 72081   | 63708   | 60040   | 91865   |
| 148111  | 85469   | 270755  | 281482  | 415663  | 260793  | 391578  | 335186  | 215697  | 312429  | 281960  | 238439  | 267779  | 339334  |
| 91712   | 80780   | 109465  | NA      | 225468  | 97294   | 97497   | 107247  | 108768  | NA      | 125422  | 68216   | 93520   | 71310   |
| 3667613 | 3714114 | 3523820 | 3434455 | 3115420 | 4070052 | 3552549 | 3518241 | 3957402 | 4097156 | 3228074 | 3791021 | 3229896 | 3404659 |
| 395732  | 203356  | 325970  | 276465  | 319148  | 379313  | 273394  | 324739  | 250101  | 272751  | 344286  | 327748  | 308626  | 273460  |
| 96581   | 99769   | NA      | 63138   | 106897  | 70962   | 123718  | 163893  | NA      | 68093   | 73977   | NA      | NA      | 154383  |
| 87418   | 155656  | 107749  | 522277  | NA      | NA      | 231684  | 279342  | NA      | 126835  | 246378  | 78447   | 143569  | 131158  |
| 143986  | 159286  | 150347  | 164659  | 154617  | 201193  | 165887  | 180403  | 177103  | 191960  | 140390  | 175571  | 141052  | 141772  |
| 526669  | NA      | 412692  | NA      | 369548  | 378028  | 240033  | 399145  | 156204  | NA      | 376873  | 172417  | 235169  | 109035  |
| 593083  | 758267  | 532428  | 468115  | 442837  | 523415  | 597757  | 516986  | 521942  | 439099  | 550366  | 531975  | 513041  | 584852  |

|         |         |         |         |         |         |         |         |         |         |         |         |         |         |
|---------|---------|---------|---------|---------|---------|---------|---------|---------|---------|---------|---------|---------|---------|
| 112371  | 85067   | NA      | 115653  | 120675  | 98486   | 93068   | 112397  | 131729  | 73113   | 94969   | 99625   | 74519   | 108851  |
| 202205  | 226161  | 82246   | 178358  | 177824  | 182809  | 116697  | 194006  | 222449  | 155779  | 220213  | 176346  | 138281  | 172940  |
| 1045416 | 1120706 | 1067221 | 1011388 | 1000743 | 1129049 | 941397  | 893461  | 1049347 | 1072442 | 866011  | 1119594 | 1138925 | 1072609 |
| 163733  | 191684  | 121093  | 178853  | 163796  | 138730  | 140335  | 151163  | 158685  | 116391  | 132034  | 131476  | 153849  | 129093  |
| NA      | 707997  | 312800  | 667982  | 759121  | 388937  | 241136  | 682601  | 252893  | 160562  | 207175  | NA      | 625219  | NA      |
| 300359  | 319359  | 318941  | 314516  | 315783  | 340351  | 286285  | 274738  | 306986  | 324084  | 275421  | 331719  | 350025  | 325652  |
| 107144  | 127684  | 77179   | 114619  | 100305  | 98611   | 88855   | 96406   | 100355  | 76745   | 87968   | 84633   | 96625   | 84914   |
| 82648   | 64204   | 69386   | 81511   | 72169   | NA      | 82834   | 75267   | 74626   | 78536   | 84466   | 64272   | 85304   | NA      |
| 317780  | 315623  | 366189  | 355944  | 366091  | 220442  | 296102  | 234689  | 214477  | 323907  | 300146  | 325859  | 381572  | 339987  |
| 65960   | 64575   | 74320   | 152944  | 160089  | 72152   | NA      | 90661   | 139027  | 92800   | 98879   | 76305   | 96942   | 67581   |
| 3546141 | 3707232 | 3517928 | 3509528 | 3429191 | 4342978 | 3378806 | 3182128 | 3375236 | 3633447 | 3116666 | 3616049 | 3742435 | 3438624 |
| 280348  | 303302  | 259400  | 382489  | 328573  | 268696  | 305121  | 314767  | 350651  | 198095  | 332340  | 237007  | 274473  | 303211  |
| NA      | 90523   | NA      | 81820   | 90870   | 91553   | 106176  | 98967   | 87964   | NA      | 63572   | NA      | 102848  | NA      |
| 285541  | 465210  | 131525  | 206751  | 271677  | NA      | 188547  | 203876  | 273065  | 651123  | 291483  | 156974  | 216277  | 260157  |
| 152631  | 166206  | 148554  | 147390  | 141896  | 215753  | 157383  | 127653  | 154883  | 175215  | 110701  | 149890  | 165522  | 156549  |
| 215545  | 294807  | 252326  | 500851  | 325628  | 76317   | 87059   | 102449  | 270749  | 295431  | 92919   | 418368  | 281955  | 187721  |
| 553293  | 560587  | 599003  | 539937  | 513057  | 447815  | 581498  | 608486  | 517466  | 549936  | 599449  | 535626  | 493864  | 553733  |

|     |          |         |         |         |         |         |         |         |         |         |         |         |         |
|-----|----------|---------|---------|---------|---------|---------|---------|---------|---------|---------|---------|---------|---------|
| 131 | 266.9461 | 509462  | 512173  | 519374  | 481225  | 508671  | 647536  | 541627  | 485625  | 352833  | 413388  | 421303  | 456483  |
| 132 | 267.1235 | 522103  | 444108  | 412385  | 397319  | 1032443 | 1788550 | 202255  | 1212257 | 186320  | 229813  | 335012  | 323335  |
| 133 | 268.8007 | 848538  | 897686  | 866142  | 801057  | 854045  | 773775  | 891217  | 877298  | 798937  | 788198  | 862107  | 753717  |
| 134 | 269.0878 | 107393  | 56198   | 68962   | 58912   | 55082   | 72507   | 68398   | NA      | 266237  | 162136  | 89456   | 82120   |
| 135 | 270.7978 | 544673  | 557857  | 569153  | 504679  | 542479  | 496230  | 566365  | 546044  | 516257  | 535046  | 548100  | 486045  |
| 137 | 272.7948 | 164603  | 162262  | 166423  | 150538  | 169435  | 150141  | 175890  | 163630  | 147708  | 150576  | 154471  | 141487  |
| 138 | 272.9577 | 101327  | 103399  | 103564  | 83590   | 111768  | 76534   | 113731  | 109690  | 78215   | 81432   | 91188   | 89622   |
| 139 | 272.9912 | 1252517 | 1110346 | 1294655 | 1240125 | 1138642 | 1085072 | 1345724 | 1301055 | 1395419 | 1331441 | 1257031 | 1123140 |
| 140 | 274.9882 | 812618  | 752568  | 877122  | 776313  | 736318  | 678689  | 867562  | 857094  | 886377  | 869793  | 823448  | 736182  |
| 141 | 276.8324 | 215728  | 224977  | 232986  | 214775  | 244970  | 156991  | 220221  | 223102  | 206055  | 221198  | 227451  | 221460  |
| 142 | 276.985  | 116843  | 107914  | 126033  | 119056  | 108593  | 96660   | 123507  | 138969  | 131479  | 120237  | 119522  | 105385  |
| 143 | 277.0324 | 133176  | 90563   | 93646   | 132130  | 121036  | NA      | 124854  | 156626  | 103672  | 108335  | 100410  | 166087  |
| 144 | 278.8296 | 275048  | 284400  | 292243  | 272246  | 303495  | 205454  | 273338  | 285358  | 260320  | 301354  | 274958  | 270771  |
| 145 | 280.8264 | 131725  | 132495  | 140271  | 124903  | 138575  | NA      | 125652  | 131707  | 121046  | 141602  | 132311  | 128397  |
| 146 | 286.0662 | 283549  | 222210  | 235207  | 217396  | 133449  | 148051  | 237419  | 184956  | 655596  | 490795  | 334567  | 349876  |
| 147 | 286.8613 | 291549  | 310970  | 307970  | 320684  | 301120  | 220344  | 294294  | 306256  | 252853  | 259707  | 281980  | 265349  |
| 148 | 288.8584 | 286337  | 302622  | 321105  | 308167  | 308992  | 213720  | 275090  | 292683  | 249223  | 258008  | 272636  | 264548  |
| 149 | 289.0676 | 118263  | 63087   | 181325  | 176145  | 150076  | 75633   | 127914  | 100453  | 99679   | 107953  | 90344   | 104131  |

|         |         |         |         |         |         |         |         |         |         |         |         |         |         |
|---------|---------|---------|---------|---------|---------|---------|---------|---------|---------|---------|---------|---------|---------|
| 432681  | 466538  | 518138  | 461498  | 449351  | 502514  | 479922  | 530755  | 559615  | 562419  | 429380  | 387297  | 394119  | NA      |
| 401822  | 628606  | 289386  | 370264  | 335119  | 256189  | 630231  | 879956  | 772633  | 311102  | 220972  | 230339  | 205455  | 194829  |
| 861117  | 917046  | 768858  | 887031  | 815713  | 832551  | 905035  | 862129  | 867309  | 806984  | 826739  | 800260  | 847285  | 741346  |
| NA      | 53492   | 102635  | 53379   | 192101  | 109653  | 131180  | NA      | NA      | 128746  | 103418  | 83546   | 113251  | 139749  |
| 546775  | 597649  | 473383  | 572816  | 529165  | 518765  | 567245  | 567940  | 554762  | 511447  | 549827  | 533150  | 555760  | 476686  |
| 164133  | 176354  | 141165  | 176129  | 156330  | 147128  | 165840  | 168837  | 163770  | 152849  | 169793  | 149929  | 169310  | 139078  |
| 95287   | 122887  | 125540  | 108318  | 79571   | 83322   | 74046   | 108610  | 122293  | 84316   | 57010   | NA      | NA      | NA      |
| 1161953 | 1274553 | 1349564 | 1154998 | 1276576 | 1378615 | 1301052 | 1288121 | 1321017 | 1442268 | 1329493 | 1304451 | 1400205 | 1350921 |
| 759074  | 834643  | 835663  | 786299  | 837761  | 884644  | 848721  | 825738  | 895916  | 916686  | 873185  | 852763  | 886522  | 813834  |
| 249348  | 227045  | 196136  | 230291  | 199415  | 199014  | 228268  | 228807  | 243525  | 195590  | 224433  | 156778  | 212390  | 189184  |
| 111691  | 113822  | 120960  | 103337  | 125785  | 136517  | 115028  | 121062  | 126957  | 134343  | 115129  | 119926  | 130120  | 115826  |
| 79572   | 141589  | 88596   | 99663   | 190672  | 156497  | 173323  | 134437  | 119023  | 136244  | 193512  | 272135  | 191080  | 251008  |
| 305501  | 305501  | 252441  | 301551  | 265473  | 267648  | 295736  | 298000  | 325054  | 246070  | 273686  | 202212  | 279128  | 230008  |
| 137941  | 139019  | 112536  | 139444  | 120412  | 119419  | 139122  | 136891  | 142073  | 123606  | 126243  | NA      | 126457  | 114670  |
| 115484  | 406673  | 326329  | 184660  | 404983  | 541813  | 281530  | 301875  | 182223  | 168631  | 818892  | 361005  | 614627  | 724806  |
| 309591  | 297518  | 309637  | 290154  | 283341  | 292261  | 271904  | 311424  | 331699  | 278505  | 299647  | 224136  | 265962  | 273113  |
| 300980  | 295279  | 297270  | 283049  | 271636  | 290387  | 262091  | 313839  | 338790  | 283635  | 286741  | 226169  | 263707  | 256909  |
| 198211  | 98864   | 60579   | 186290  | 83533   | 117334  | 122929  | 117510  | 104545  | 98499   | 91779   | 85411   | 81598   | 79695   |

|         |         |         |         |         |         |         |         |         |         |         |         |         |         |
|---------|---------|---------|---------|---------|---------|---------|---------|---------|---------|---------|---------|---------|---------|
| 614454  | 604111  | 493656  | 522771  | 552636  | 528555  | 488017  | 485457  | 455786  | 480732  | 563761  | 551884  | 524435  | 528708  |
| 673931  | 232236  | 411711  | 596185  | 583093  | 617978  | 441632  | 391057  | 194974  | 513846  | 639239  | 644599  | 714859  | 384328  |
| 771768  | 834085  | 798357  | 867997  | 781128  | 885888  | 794671  | 854915  | 847586  | 909416  | 910988  | 869679  | 1075884 | 871099  |
| 107487  | 57658   | 124303  | 122301  | NA      | 65757   | 108961  | 86944   | 162525  | NA      | NA      | NA      | 123693  | 68885   |
| 499035  | 510747  | 522819  | 560923  | 498074  | 552711  | 513918  | 541571  | 538449  | 577544  | 571760  | 581518  | 670269  | 561930  |
| 150566  | 159045  | 157549  | 166027  | 151302  | 165303  | 162550  | 171749  | 159820  | 170672  | 177127  | 174404  | 213095  | 171911  |
| 65902   | 98322   | 68451   | 64786   | 84334   | 104223  | 92103   | 88712   | 69779   | 119267  | 121233  | 91522   | 112791  | 135961  |
| 1433316 | 1355940 | 1383781 | 1264046 | 1117979 | 1224244 | 1436462 | 1325633 | 1529194 | 1301206 | 1306831 | 1230325 | 1282490 | 1277904 |
| 934227  | 851141  | 898999  | 854845  | 714096  | 777261  | 906155  | 875423  | 984417  | 867668  | 866390  | 798080  | 821050  | 847324  |
| 181809  | 214743  | 205459  | 205979  | 156699  | 207257  | 194349  | 220628  | 210195  | 229849  | 246644  | 220333  | 267885  | 223460  |
| 126711  | 117170  | 121099  | 115931  | 97312   | 120868  | 131050  | 117789  | 143159  | 126354  | 127257  | 123917  | 117349  | 120822  |
| 219984  | 81782   | 213513  | 231787  | 189232  | 132360  | 146880  | 173667  | 142725  | 119448  | 68215   | 88205   | 79140   | 117752  |
| 234862  | 274544  | 263106  | 273442  | 199484  | 264112  | 256121  | 290429  | 272575  | 291312  | 308334  | 281099  | 354065  | 289870  |
| 106892  | 127460  | 127627  | 120383  | NA      | 115866  | 126436  | 135674  | 121698  | 137890  | 140288  | 126689  | 157442  | 136212  |
| 531322  | 156840  | 709597  | 451064  | 314041  | 149123  | 243527  | 217806  | 381609  | 207854  | 173669  | 158454  | 583719  | 256803  |
| 273629  | 319996  | 285289  | 275853  | 221502  | 290134  | 280594  | 292002  | 325955  | 304366  | 341744  | 309193  | 315329  | 287483  |
| 265746  | 302733  | 289990  | 275615  | 217500  | 280698  | 280789  | 289312  | 302800  | 294016  | 317966  | 317172  | 316856  | 294026  |
| 110302  | 141100  | 81590   | 172624  | 142278  | 173483  | 120481  | 135460  | 154662  | 107236  | 99202   | 81833   | 51868   | 127467  |

|         |         |         |         |         |         |         |         |         |         |         |         |         |         |
|---------|---------|---------|---------|---------|---------|---------|---------|---------|---------|---------|---------|---------|---------|
| 576677  | 495063  | 497129  | NA      | 453116  | 567287  | 526817  | 558159  | 687007  | 642052  | 490973  | 556952  | 432853  | 430206  |
| 886957  | 376962  | 404929  | 210226  | 366135  | 746904  | 281398  | 485887  | 499527  | 323158  | 456897  | 330839  | 674163  | 287149  |
| 922940  | 1171100 | 840473  | 767355  | 722757  | 794729  | 960210  | 829409  | 826775  | 738417  | 847017  | 853126  | 816916  | 939746  |
| NA      | 57215   | NA      | NA      | 192955  | NA      | 64384   |
| 616480  | 766196  | 541103  | 485691  | 456354  | 527776  | 623347  | 536853  | 536296  | 450346  | 555708  | 534246  | 550525  | 583322  |
| 182319  | 242109  | 159421  | 147408  | 140868  | 155589  | 179909  | 158083  | 170081  | 139425  | 165158  | 168515  | 163193  | 177318  |
| 126826  | 99847   | 77118   | NA      | 79075   | 94722   | 93980   | 106351  | 128728  | 126852  | 80277   | 105569  | 91885   | 74152   |
| 1410327 | 1384562 | 1207343 | 1196490 | 1438649 | 1060804 | 1295870 | 1282157 | 1194909 | 1079009 | 1163248 | 1216505 | 1258978 | 1192649 |
| 903459  | 896096  | 817892  | 759984  | 876809  | 721278  | 866795  | 833432  | 754713  | 662963  | 778280  | 759933  | 778816  | 789389  |
| 246494  | 298399  | 216646  | 204612  | 175369  | 151407  | 230879  | 208378  | 205796  | 147195  | 202981  | 210355  | 188462  | 240952  |
| 131924  | 126478  | 109190  | 110680  | 123612  | 106023  | 125461  | 114928  | 116152  | 96897   | 108491  | 106878  | 115646  | 119573  |
| 110869  | 173662  | 120674  | 109183  | 196144  | 115429  | 111257  | 103174  | NA      | 94884   | 140302  | 103648  | 103133  | 114839  |
| 309908  | 376351  | 286915  | 257263  | 217025  | 197690  | 303172  | 255927  | 264033  | 199772  | 262355  | 274396  | 263744  | 306119  |
| 136193  | 178800  | 128450  | 123830  | 100968  | NA      | 145419  | 120085  | 124396  | NA      | 119254  | 131165  | 120602  | 143122  |
| 81024   | 170479  | 156315  | 123972  | 548192  | 203009  | 217715  | 189155  | 121106  | 236885  | 192594  | 121976  | 102325  | 332130  |
| 318091  | 339015  | 295311  | 287934  | 263562  | 237974  | 332540  | 298550  | 290844  | 247031  | 291272  | 311210  | 281281  | 296212  |
| 326856  | 336187  | 297052  | 283055  | 251882  | 226125  | 320338  | 280025  | 297807  | 226422  | 293572  | 292762  | 284203  | 305296  |
| 95160   | 88915   | NA      | NA      | 119054  | NA      | 93464   | 164109  | 123657  | 95900   | 64644   | 89670   | 102264  | 129710  |



|         |         |         |         |         |        |         |         |         |         |         |         |         |         |
|---------|---------|---------|---------|---------|--------|---------|---------|---------|---------|---------|---------|---------|---------|
| 537147  | 438172  | 455938  | 548277  | 525532  | 662660 | 471113  | 548957  | 628285  | 519929  | 479367  | 509643  | 556740  | 504950  |
| 292599  | 804670  | 239509  | 507771  | 798756  | 548300 | 697898  | 953585  | 1202272 | 832192  | 510868  | 310444  | 641999  | 344460  |
| 867056  | 879114  | 920291  | 853022  | 851315  | 716897 | 916261  | 924534  | 856308  | 851594  | 924655  | 848805  | 780058  | 893582  |
| NA      | NA      | NA      | NA      | NA      | NA     | NA      | 75552   | NA      | NA      | 52162   | NA      | NA      | NA      |
| 562613  | 585956  | 595049  | 534226  | 547872  | 459938 | 573616  | 594848  | 524557  | 564724  | 612717  | 553711  | 498941  | 570704  |
| 166083  | 178932  | 179529  | 161067  | 162291  | 141328 | 170815  | 184254  | 167406  | 164957  | 180509  | 170146  | 155323  | 168204  |
| 124166  | 142639  | 113028  | 119007  | 111263  | 76667  | 117043  | 117766  | 105267  | 103243  | 116172  | 90241   | 88491   | 97567   |
| 1181169 | 1262147 | 1202733 | 1147615 | 1103640 | 977899 | 1216824 | 1181679 | 1224125 | 1270446 | 1193401 | 1096870 | 1246653 | 1141251 |
| 761862  | 852250  | 788265  | 770185  | 715442  | 636475 | 811377  | 779928  | 765504  | 827617  | 789204  | 696959  | 780664  | 754034  |
| 233676  | 257193  | 243453  | 220739  | 228496  | NA     | 229868  | 249268  | 197442  | 211383  | 228435  | 204133  | 203098  | 213502  |
| 115344  | 115088  | 114803  | 105371  | 106729  | 85554  | 120025  | 107445  | 111912  | 120074  | 106373  | 105407  | 121367  | 117932  |
| 90978   | 88119   | NA      | 98307   | 69216   | 80105  | 100087  | 76576   | 101627  | 185344  | NA      | 105746  | 117661  | 88675   |
| 306356  | 326672  | 306142  | 281579  | 285691  | 161890 | 282575  | 324021  | 257962  | 271172  | 318242  | 274059  | 253927  | 260110  |
| 137413  | 140800  | 143314  | 126233  | 130285  | NA     | 130832  | 148500  | 121656  | 132966  | 148815  | 122417  | 120774  | 125972  |
| 189114  | 186681  | 160623  | 270962  | 234745  | 154442 | 220940  | 179341  | 97080   | 297729  | 153699  | 124675  | 281318  | 184504  |
| 314107  | 351174  | 321912  | 292756  | 313196  | 184287 | 297299  | 304644  | 290257  | 314266  | 303410  | 293805  | 301438  | 301639  |
| 312866  | 332279  | 308864  | 295527  | 309157  | 196243 | 280976  | 298203  | 291178  | 304198  | 296325  | 280022  | 306650  | 290915  |
| 107141  | 83570   | 139611  | 159037  | 150343  | NA     | 66522   | 119924  | 146392  | 115190  | 96267   | 111382  | 120050  | 76568   |



|         |         |         |         |         |         |         |         |         |         |         |         |         |         |
|---------|---------|---------|---------|---------|---------|---------|---------|---------|---------|---------|---------|---------|---------|
| 54202   | 121243  | 68795   | 95534   | NA      | 116106  | NA      | 119508  | NA      | NA      | 112547  | 135057  | 106512  | 122796  |
| 392846  | 415513  | 415898  | 363516  | 384993  | 444539  | 357173  | 445916  | 438353  | 430544  | 400339  | 393399  | 369368  | 408614  |
| 243607  | 255171  | 267532  | 234054  | 238726  | 267056  | 218227  | 271069  | 268312  | 249898  | 243935  | 238557  | 226500  | 254239  |
| 579208  | 572152  | 626741  | 558687  | 564134  | 676909  | 551596  | 648094  | 633199  | 642174  | 577931  | 717127  | 544513  | 579106  |
| 71135   | 158399  | 131434  | 126172  | 351514  | 213926  | 202922  | 142985  | 94091   | 156287  | 224623  | 127435  | 265248  | 191131  |
| 174630  | 173185  | 191212  | 169746  | 172338  | 200179  | 163579  | 192687  | 182992  | 192062  | 176697  | 212440  | 158967  | 177474  |
| 270371  | NA      | 214437  | 230384  | 168323  | 125334  | 171230  | 243560  | 278737  | 139455  | 283808  | 183815  | 147513  | 267980  |
| 110448  | 301689  | 108428  | 193746  | 217259  | 139972  | 215641  | 116502  | 122635  | 242807  | 260748  | 122051  | 190668  | 308799  |
| 2277363 | 2402059 | 2242104 | 2336778 | 2376545 | 2487604 | 2241984 | 2628116 | 2499100 | 2509274 | 2388026 | 2718776 | 2300946 | 2244140 |
| 136317  | 118899  | 173512  | 125150  | 151410  | 130885  | 109517  | 134914  | 134031  | 120637  | 90591   | 133871  | 109488  | 143471  |
| 141454  | 156172  | 159766  | 147789  | 149645  | 150048  | 148378  | 162196  | 171720  | 163721  | 133015  | 167496  | 132401  | 155186  |
| 175809  | 179026  | 199095  | 178470  | 154286  | 260071  | 169056  | 211825  | 205393  | 188021  | 208871  | 126779  | 195090  | 218004  |
| 149833  | 140381  | 142458  | 131126  | 177286  | 140721  | 154958  | 170555  | 152572  | 158310  | 171992  | 143718  | 124854  | 128932  |
| 234336  | 248125  | 209872  | 235707  | 230277  | 222937  | 244466  | 244420  | 230264  | 212496  | 235717  | 218956  | 230333  | 196063  |
| 456860  | 473318  | 411762  | 474712  | 437785  | 419607  | 484381  | 501207  | 478414  | 438543  | 455537  | 432427  | 458759  | 370836  |
| 368994  | 384418  | 323485  | 375238  | 343924  | 344691  | 385158  | 377834  | 363909  | 340103  | 363480  | 343380  | 362475  | 307881  |
| NA      | NA      | NA      | NA      | NA      | 62560   | 52384   | 98602   | 151374  | 83995   | 56613   | NA      | 158151  | 163635  |

|         |         |         |         |         |         |         |         |         |         |         |         |         |         |
|---------|---------|---------|---------|---------|---------|---------|---------|---------|---------|---------|---------|---------|---------|
| 132473  | 60504   | 121582  | 114059  | 109824  | 131176  | 60304   | 69146   | 84240   | 61371   | 70336   | 62273   | 108279  | 110223  |
| 453010  | 457328  | 420664  | 424387  | 413660  | 433979  | 415733  | 429944  | 457030  | 426921  | 451913  | 462941  | 429829  | 421630  |
| 283983  | 276276  | 257184  | 262048  | 265177  | 280330  | 267156  | 258623  | 281755  | 270360  | 278923  | 283823  | 260147  | 254877  |
| 687105  | 720572  | 616230  | 642653  | 750069  | 653282  | 619683  | 667575  | 642793  | 614134  | 664874  | 698500  | 655492  | 595708  |
| 217581  | 81839   | 226694  | 185336  | 171787  | 135930  | 155333  | 180394  | 177638  | 139220  | 122221  | 96527   | 458964  | 246553  |
| 205575  | 203744  | 189358  | 184585  | 221521  | 195048  | 186540  | 202227  | 186772  | 179622  | 200598  | 205990  | 194448  | 175610  |
| 97184   | 253752  | 128824  | 215712  | 228521  | 129166  | 165442  | 310176  | 120938  | 155184  | 173502  | 59321   | 338435  | 257764  |
| 416703  | 107436  | 144473  | 195045  | 231974  | 213402  | 106516  | 335477  | 376154  | 190916  | 91284   | 153542  | 206724  | 270705  |
| 2589920 | 2508157 | 2502020 | 2517921 | 2858959 | 2577706 | 2330967 | 2640222 | 2531367 | 2520937 | 2590344 | 2714853 | 2702760 | 2401755 |
| 136118  | 134867  | 113660  | 125279  | 114074  | 138441  | 176137  | 115202  | 116532  | 127691  | 114528  | 131721  | 166206  | 128504  |
| 172442  | 157908  | 147900  | 166564  | 175231  | 170369  | 146832  | 170215  | 167681  | 173776  | 156804  | 159568  | 174831  | 167097  |
| 207327  | 208024  | 203320  | 178680  | 234011  | 234663  | 167834  | 180115  | 243151  | 140644  | 158945  | 231189  | 203114  | 191408  |
| 185321  | 148533  | 167321  | 143698  | 133574  | 137535  | 172703  | 205747  | 146991  | 177389  | 196177  | 141435  | 192194  | 179065  |
| 198142  | 224814  | 226286  | 238140  | 211244  | 206886  | 215814  | 221073  | 228567  | 245604  | 258109  | 248671  | 302393  | 244069  |
| 396511  | 442643  | 435737  | 469075  | 436609  | 429321  | 428673  | 454830  | 447674  | 492861  | 501562  | 468742  | 600287  | 481262  |
| 312659  | 352479  | 340124  | 386553  | 332221  | 336262  | 327924  | 360156  | 358727  | 385972  | 394642  | 376488  | 465480  | 374991  |
| 149578  | 112319  | 251923  | 180996  | 185328  | NA      | 188183  | 86690   | 139711  | 262047  | 241019  | 148525  | 142517  | 103321  |

|         |         |         |         |         |         |         |         |         |         |         |         |         |         |
|---------|---------|---------|---------|---------|---------|---------|---------|---------|---------|---------|---------|---------|---------|
| 76838   | 66284   | 120839  | 60117   | 83749   | 110405  | 66886   | 86016   | 84167   | 64627   | 141723  | 71086   | 146160  | 147986  |
| 481054  | 457023  | 481051  | 429923  | 408881  | 459492  | 467140  | 456437  | 480763  | 419861  | 428599  | 446333  | 428584  | 431618  |
| 295714  | 289531  | 285230  | 261171  | 258244  | 279484  | 299186  | 272812  | 304265  | 268659  | 273335  | 283373  | 263720  | 259967  |
| 705390  | 707948  | 734386  | 681497  | 612653  | 814240  | 640958  | 694709  | 747852  | 770311  | 648412  | 680835  | 634486  | 669307  |
| 95865   | 254368  | 74501   | 83061   | 240698  | 129184  | 98255   | 102952  | 86280   | 87580   | 100090  | 63978   | 65374   | 205485  |
| 205510  | 216400  | 205028  | 207270  | 189491  | 253628  | 201300  | 209205  | 226748  | 218279  | 201609  | 209481  | 188619  | 201140  |
| 153074  | 178462  | 405375  | 273227  | 244994  | 383129  | 459561  | 394564  | 211682  | 343680  | 339132  | 384038  | 256615  | 382182  |
| 208714  | 133507  | 158962  | 211927  | 399884  | 191587  | 173387  | 235015  | 163977  | 187335  | 153206  | 83985   | 171243  | 180789  |
| 2678051 | 3158651 | 2614951 | 2406079 | 2330504 | 2968167 | 2690881 | 2644848 | 2877669 | 3017600 | 2499489 | 2811753 | 2254399 | 2588454 |
| 178103  | NA      | 111432  | NA      | 158751  | 157592  | 131420  | 140474  | 101884  | 109600  | 149476  | 131070  | 130106  | 94553   |
| 181513  | NA      | 157208  | NA      | 144495  | 189308  | 180870  | 179284  | 164977  | 160772  | 163059  | 187624  | 159053  | 149725  |
| 119787  | 129626  | 199135  | 244805  | 353454  | 237228  | 228641  | 242425  | 214889  | 256448  | 192462  | 219131  | 206561  | 226563  |
| 179207  | 130969  | 144108  | 148607  | 142851  | 130700  | 176072  | 154689  | 174304  | 142728  | 159042  | 143022  | 121473  | 164637  |
| 253733  | 320120  | 230177  | 197164  | 190777  | 211258  | 261984  | 213887  | 224728  | 191843  | 237085  | 227049  | 223767  | 255119  |
| 521214  | 645053  | 454705  | 387211  | 379088  | 428909  | 506261  | 440407  | 447868  | 390963  | 450734  | 450543  | 444829  | 494229  |
| 385063  | 509441  | 362873  | 305087  | 310114  | 336530  | 399163  | 334756  | 331684  | 305004  | 373101  | 350833  | 338384  | 405150  |
| NA      | 82310   | 69416   | 102348  | 207525  | NA      | 176338  | 178892  | 72153   | 176830  | 178777  | 76072   | 108105  | 181383  |

|         |         |         |         |         |         |         |         |         |         |         |         |         |         |
|---------|---------|---------|---------|---------|---------|---------|---------|---------|---------|---------|---------|---------|---------|
| 163149  | 67755   | NA      | 143813  | 169710  | NA      | NA      | 59371   | 72728   | 122840  | NA      | 134106  | 168965  | NA      |
| 448912  | 482475  | 453172  | 434489  | 488422  | 367834  | 417825  | 382265  | 432743  | 461025  | 381771  | 449999  | 470678  | 454517  |
| 280307  | 301161  | 275800  | 276166  | 287598  | 227977  | 255626  | 239389  | 273138  | 280665  | 243557  | 278959  | 300317  | 267410  |
| 696109  | 684689  | 672576  | 644935  | 685406  | 766390  | 635434  | 598810  | 648286  | 706073  | 580932  | 692110  | 727335  | 673675  |
| 92999   | 110039  | NA      | 165623  | 129902  | 107678  | 134665  | 181882  | 61965   | 188378  | 88267   | 80385   | 117996  | 120805  |
| 220848  | 211645  | 207194  | 188028  | 198604  | 231158  | 194313  | 169832  | 210671  | 205857  | 163481  | 207023  | 216761  | 199134  |
| 259723  | 383725  | 443035  | 735030  | 273298  | 140165  | 209097  | 609545  | 124353  | 350233  | 439315  | 297056  | 377023  | 393405  |
| 205897  | 247236  | 204897  | 215828  | 113811  | 174498  | 283946  | 139960  | 132381  | 284213  | 177954  | NA      | 143853  | 193168  |
| 2642423 | 2795786 | 2629477 | 2577582 | 2599491 | 3083808 | 2570462 | 2439423 | 2488031 | 2726753 | 2360095 | 2654527 | 2697635 | 2589176 |
| 133820  | 117927  | 97481   | 153902  | 129798  | 77360   | 96208   | 126560  | 156656  | 108922  | 138848  | 83204   | 102807  | 127742  |
| 168041  | 168029  | 147192  | 181005  | 176796  | 140081  | 152313  | 147238  | 168112  | 155100  | 147438  | 135311  | 149611  | 169381  |
| 220565  | 187292  | 252916  | 225978  | 260343  | 220941  | 198952  | 172929  | 194962  | 170343  | 205718  | 221909  | 319864  | 181325  |
| 151055  | 177239  | 167810  | 168862  | 160102  | 104310  | 163072  | 150291  | 120765  | 192280  | 146279  | 165033  | 180264  | 147020  |
| 243986  | 245759  | 256502  | 237745  | 225321  | 182045  | 257895  | 269117  | 221888  | 227591  | 263448  | 228461  | 213595  | 237460  |
| 474691  | 479239  | 504991  | 469535  | 455169  | 378787  | 484568  | 511389  | 449827  | 470074  | 507431  | 459638  | 442068  | 469363  |
| 376255  | 386495  | 393638  | 357766  | 363609  | 280857  | 386408  | 399349  | 343947  | 364297  | 393060  | 350691  | 335632  | 367359  |
| 94198   | 258673  | 69602   | 101861  | 270799  | 145259  | 141797  | 111315  | 133776  | 85568   | 263392  | 89081   | 66207   | 93812   |

|     |          |         |         |         |         |         |        |         |         |        |         |         |         |
|-----|----------|---------|---------|---------|---------|---------|--------|---------|---------|--------|---------|---------|---------|
| 169 | 330.7534 | 150276  | 152286  | 141512  | 132796  | 146873  | NA     | 155026  | 152902  | 140820 | 137998  | 149084  | 133926  |
| 170 | 330.9499 | 207374  | 179151  | 204924  | 199126  | 189473  | 159923 | 203744  | 218344  | 313245 | 278076  | 233620  | 216383  |
| 171 | 332.1117 | 121762  | 100751  | 90703   | 145153  | 87919   | NA     | 120519  | 100486  | 80177  | 135726  | 74195   | 113866  |
| 172 | 332.9217 | 160589  | 142083  | 145935  | 157784  | 132970  | 182529 | 198944  | 163000  | 125251 | 125852  | 111781  | 142224  |
| 173 | 332.9469 | 198188  | 166427  | 182504  | 181657  | 169218  | 157630 | 203445  | 202404  | 296271 | 253546  | 220196  | 194879  |
| 174 | 334.7914 | 125781  | 138227  | 127314  | 127259  | 122011  | 101530 | 117504  | 130831  | 122266 | 125618  | 128510  | 117776  |
| 176 | 335.0494 | 2120492 | 2858434 | 2438667 | 3141103 | 2639920 | NA     | 1691674 | 1919929 | 831331 | 1528976 | 2838831 | 2540951 |
| 177 | 336.7883 | 202672  | 214773  | 214088  | 194806  | 213470  | 169161 | 199801  | 211451  | 197009 | 204450  | 196671  | 191183  |
| 179 | 338.7851 | 125279  | 123376  | 117173  | 119710  | 129976  | 102825 | 120328  | 124445  | 114012 | 133080  | 124688  | 119513  |
| 181 | 343.0912 | 304550  | 189211  | 292758  | 197609  | 195607  | 126788 | 433040  | 356218  | 863726 | 478335  | 276352  | 237699  |
| 182 | 344.8201 | 148278  | 147824  | 159071  | 151090  | 166499  | NA     | 133857  | 145874  | 130150 | 142224  | 142097  | 148155  |
| 183 | 345.0879 | 111175  | NA      | 83464   | 59196   | NA      | NA     | 129977  | 104493  | 264139 | 141818  | 76518   | 70081   |
| 184 | 346.817  | 189392  | 205610  | 194799  | 211333  | 207798  | 133930 | 164884  | 185354  | 162889 | 184717  | 192858  | 181952  |
| 185 | 348.1021 | 153168  | 101793  | 173159  | 253452  | 164574  | 165038 | NA      | 76319   | NA     | NA      | NA      | 53692   |
| 186 | 348.1021 | 594417  | 619119  | 612196  | 530706  | 548692  | 348209 | 672518  | 645072  | 565627 | 584741  | 594673  | 641313  |
| 188 | 354.8491 | 206629  | 218569  | 220661  | 210076  | 230649  | 159304 | 205020  | 199050  | 168483 | 173849  | 194041  | 180705  |
| 189 | 354.9993 | 227441  | 222260  | 227178  | 232855  | 238749  | 223445 | 185003  | 201548  | 176969 | 185594  | 224445  | 188754  |
| 190 | 356.8459 | 199725  | 221817  | 222893  | 208531  | 224211  | 155793 | 193370  | 204685  | 165394 | 169146  | 191193  | 179544  |

|         |         |         |         |         |         |         |         |         |         |         |         |        |        |
|---------|---------|---------|---------|---------|---------|---------|---------|---------|---------|---------|---------|--------|--------|
| 152169  | 158270  | 128234  | 148192  | 143774  | 130105  | 159333  | 162945  | 147473  | 145423  | 145006  | 143315  | 146600 | 123568 |
| 188817  | 201764  | 263778  | 178791  | 281285  | 305333  | 236406  | 188602  | 189873  | 308840  | 277561  | 253111  | 262616 | 283702 |
| 92582   | 295612  | 119759  | 104463  | 92303   | 283312  | 96778   | 67284   | NA      | 238255  | 153932  | 159646  | 218027 | 75871  |
| 123371  | 141730  | 136228  | 130092  | 153123  | 181120  | 144073  | 142996  | 136990  | 174139  | 149750  | 194925  | 122601 | 136829 |
| 196068  | 192329  | 261665  | 163898  | 264716  | 283198  | 222467  | 201435  | 188245  | 314395  | 265626  | 231620  | 258842 | 271457 |
| 131809  | 132925  | 109035  | 145324  | 128455  | 116192  | 132744  | 131536  | 142600  | 114652  | 128311  | 98586   | 130433 | 114902 |
| 3524759 | 2079350 | 1830875 | 2376162 | 1534407 | 1404948 | 2972989 | 1845496 | 2917138 | 1799317 | 1575625 | 1217918 | 826491 | NA     |
| 218937  | 213155  | 190054  | 223553  | 190546  | 187562  | 212508  | 212830  | 236365  | 182982  | 212308  | 168920  | 221608 | 185481 |
| 134944  | 129220  | 118530  | 133709  | 119198  | 114293  | 134112  | 125880  | 150826  | 113320  | 130968  | 105492  | 135845 | 118082 |
| 177850  | 277118  | 365467  | 212745  | 675729  | 518701  | 331529  | 274334  | 203744  | 381946  | 352414  | 314468  | 402924 | 556846 |
| 160557  | 159674  | 146852  | 147414  | 135157  | 142061  | 134094  | 153631  | 162902  | 134838  | 143506  | NA      | 137916 | 132392 |
| NA      | 81350   | 109766  | 63104   | 191278  | 158129  | 98805   | 81180   | NA      | 126066  | 107239  | 90423   | 124309 | 161637 |
| 203744  | 199403  | 185119  | 196366  | 173885  | 177981  | 189207  | 194634  | 212949  | 183244  | 200336  | NA      | 173952 | 169431 |
| 202779  | 60393   | 96573   | NA      | NA      | 109180  | 71908   | NA      | 109057  | 117010  | 141820  | 294787  | 186975 | 134773 |
| 547930  | 570849  | 616131  | 500260  | 635356  | 726572  | 641906  | 739782  | 625874  | 802442  | 617585  | 535905  | 414958 | 595395 |
| 206572  | 203744  | 222449  | 203774  | 186918  | 219659  | 187575  | 233437  | 221923  | 200009  | 204238  | 186157  | 180397 | 190204 |
| 215966  | 216140  | 237160  | 222613  | 205308  | 218596  | 194718  | 214471  | 241196  | 201588  | 198861  | 229317  | 195978 | 198401 |
| 211432  | 204556  | 215349  | 196536  | 187292  | 203744  | 176153  | 217002  | 217501  | 191726  | 189421  | 165483  | 159486 | 183313 |



|         |         |         |         |         |         |         |         |         |         |         |         |         |         |
|---------|---------|---------|---------|---------|---------|---------|---------|---------|---------|---------|---------|---------|---------|
| NA      | 151468  | 141856  | 152052  | NA      | 139809  | 136563  | 156860  | 141703  | 154390  | 155870  | 156868  | 195340  | 160284  |
| 232005  | 206695  | 266539  | 277696  | 131128  | 224160  | 242513  | 247572  | 312798  | 202315  | 191098  | 190271  | 209520  | 177428  |
| 188640  | 83379   | 168993  | 78382   | 78135   | 165515  | 63242   | 71491   | 138141  | 94602   | 127056  | 208678  | 103406  | 147003  |
| 197966  | 139555  | 138236  | 147734  | 209698  | 205412  | 151152  | 177020  | 214033  | 160430  | 157611  | 152203  | 121999  | 158319  |
| 240646  | 212976  | 257544  | 271076  | 131100  | 203768  | 250142  | 234123  | 281642  | 182637  | 182841  | 185509  | 197822  | 176856  |
| 104215  | 118279  | 114500  | 118712  | 104667  | 118969  | 109041  | 131150  | 125028  | 129138  | 133251  | 132025  | 154727  | 136827  |
| 2733427 | 2426536 | 2120290 | 1545114 | 1652226 | 1633062 | 2121204 | 1335900 | 1670526 | 1614313 | 3203550 | 2920297 | 3125889 | 2511762 |
| 179289  | 198404  | 190436  | 194324  | 164068  | 190717  | 196292  | 208082  | 201265  | 204527  | 218725  | 209235  | 255280  | 217781  |
| 108372  | 125422  | 120448  | 121014  | NA      | 109375  | 119549  | 132805  | 118606  | 121060  | 134979  | 124848  | 154756  | 128637  |
| 526022  | 197928  | 507418  | 413846  | 343156  | 292411  | 371780  | 353302  | 476953  | 285125  | 250255  | 248432  | 542024  | 394631  |
| 118487  | 149914  | 145671  | 135588  | NA      | 146422  | 136170  | 144831  | 153313  | 159115  | 161931  | 149771  | 165329  | 149055  |
| 154254  | 61882   | 157651  | 126166  | 103044  | 83865   | 112811  | 114124  | 134215  | 81888   | 73005   | 78001   | 168126  | 118669  |
| 164724  | 187342  | 172967  | 163877  | NA      | 180246  | 174372  | 185434  | 196883  | 203679  | 216529  | 199859  | 216757  | 191488  |
| 283475  | 178067  | 172667  | 138894  | 92032   | 124111  | 168173  | NA      | 129416  | 86087   | 109479  | 182027  | 134839  | NA      |
| 619075  | 740539  | 693424  | 627924  | 514098  | 623373  | 620415  | 783813  | 723688  | 625174  | 717099  | 609656  | 415002  | 570829  |
| 202449  | 230942  | 204168  | 201276  | 170551  | 203720  | 205839  | 208624  | 212780  | 205693  | 214219  | 235843  | 221285  | 204521  |
| 202322  | 242417  | 185932  | 193395  | 215128  | 272957  | 225174  | 207522  | 212827  | 241985  | 220736  | 218025  | 231924  | 236022  |
| 200615  | 200604  | 201895  | 193593  | 163887  | 199341  | 200992  | 206606  | 212944  | 205464  | 226367  | 214797  | 203198  | 203903  |

|         |        |         |        |         |         |         |         |         |         |         |         |         |         |
|---------|--------|---------|--------|---------|---------|---------|---------|---------|---------|---------|---------|---------|---------|
| 165172  | 211034 | 141756  | 127598 | 121142  | 135053  | 161650  | 142214  | NA      | 131118  | 147617  | 148769  | 148872  | 159284  |
| 197351  | 243863 | 167288  | 154036 | 306544  | 144465  | 186020  | 195022  | 154268  | 124322  | 163548  | 179109  | 169240  | 176440  |
| 96281   | 105756 | NA      | 92306  | 140971  | 129767  | NA      | 140170  | 135566  | 96847   | 124853  | 156166  | 84768   | 87540   |
| 143738  | 174122 | 140298  | 162756 | 137951  | 196928  | 170432  | 167229  | 175258  | 200246  | 137595  | 177349  | 132384  | 142435  |
| 193461  | 230176 | 170592  | 160905 | 284246  | 130665  | 195041  | 170291  | 150453  | 116521  | 164030  | 172151  | 161753  | 161492  |
| 143801  | 171916 | 124612  | 106154 | 110720  | NA      | 137425  | 123645  | 122774  | NA      | 112543  | 116381  | 119476  | 132545  |
| 2222913 | NA     | 1730402 | NA     | 1379224 | 1421001 | 2008095 | 3059343 | 2858322 | 2144955 | 2225836 | 1585810 | 1317003 | 1131174 |
| 240272  | 293379 | 206938  | 173829 | 173372  | 173228  | 228138  | 189039  | 210103  | 153807  | 182869  | 200971  | 192744  | 213515  |
| 138285  | 180299 | 127939  | 111317 | 107535  | 108053  | 142440  | 123519  | 120874  | 98915   | 111170  | 122450  | 120236  | 133843  |
| 193701  | 187504 | 166704  | 190576 | 587360  | 269153  | 179812  | 243714  | 188919  | 206929  | 253746  | 141053  | 178768  | 362145  |
| 161698  | 173921 | 141734  | 139216 | 124395  | NA      | 164815  | 137584  | 136137  | NA      | 138849  | 147115  | 145257  | 157956  |
| NA      | NA     | NA      | NA     | 162821  | 80356   | NA      | 71738   | NA      | NA      | 72500   | NA      | NA      | 106467  |
| 204281  | 234568 | 187077  | 177355 | 161534  | NA      | 208986  | 180633  | 168877  | 140803  | 177907  | 194025  | 191397  | 199446  |
| 80960   | NA     | 245861  | 207212 | 97814   | 129162  | 116754  | 173778  | 173916  | 165270  | 207123  | 193804  | 172309  | 182114  |
| 694793  | 527270 | 579183  | 584267 | 590509  | 517261  | 597434  | 656084  | 597178  | 550472  | 609080  | 622834  | 556454  | 589632  |
| 240470  | 222074 | 227341  | 216629 | 190402  | 188477  | 221171  | 203744  | 228728  | 187349  | 206537  | 241711  | 205773  | 217429  |
| 273697  | 171546 | 241882  | 234315 | 228495  | 259833  | 273029  | 259977  | 227400  | 258567  | 245695  | 263057  | 232485  | 234748  |
| 238158  | 211821 | 224390  | 189025 | 185003  | 178417  | 211424  | 204960  | 218891  | 174180  | 196707  | 209443  | 204847  | 212851  |

|         |         |         |         |         |         |         |         |         |         |         |         |         |         |
|---------|---------|---------|---------|---------|---------|---------|---------|---------|---------|---------|---------|---------|---------|
| 151603  | 151785  | 162997  | 146869  | 149413  | NA      | 160844  | 164804  | 152853  | 147218  | 161572  | 147714  | 139930  | 149668  |
| 187804  | 192128  | 185510  | 155000  | 183567  | 101805  | 182020  | 174627  | 163529  | 190333  | 199837  | 146449  | 153867  | 162179  |
| 115848  | 127392  | NA      | 75905   | 96467   | 90709   | 116171  | 74442   | 79774   | 93484   | 93462   | NA      | 119842  | 86787   |
| 158471  | 163894  | 154412  | 140675  | 134348  | 195609  | 147400  | 132772  | 142298  | 171837  | 118016  | 152834  | 164633  | 150384  |
| 177297  | 173517  | 170505  | 148493  | 157481  | 97738   | 178380  | 170096  | 157248  | 176561  | 184957  | 143646  | 151573  | 159765  |
| 135716  | 137556  | 125881  | 112851  | 127775  | NA      | 142172  | 144062  | 114488  | 127278  | 136171  | 124596  | 112158  | 124655  |
| 2145578 | 1173281 | 1178586 | 2935114 | 2481545 | 2086193 | 1406869 | 3397699 | 3221991 | 2441108 | 1993630 | 1675696 | 1528890 | 1568766 |
| 218574  | 225846  | 217732  | 193228  | 210281  | 157269  | 208060  | 232442  | 191806  | 201542  | 232839  | 197216  | 191602  | 200336  |
| 142069  | 139224  | 130980  | 114614  | 129504  | NA      | 133989  | 140283  | 119792  | 128540  | 135503  | 125800  | 121413  | 118121  |
| 178554  | 210356  | 106200  | 354294  | 320979  | 237742  | 207332  | 263758  | 149210  | 351662  | 141450  | 170343  | 267816  | 229544  |
| 145302  | 168259  | 154949  | 141816  | 157512  | NA      | 142651  | 157466  | 144544  | 148198  | 170930  | 138979  | 139313  | 138940  |
| NA      | 61940   | NA      | 105517  | 90811   | NA      | NA      | 81906   | NA      | 107151  | NA      | NA      | 76921   | 66778   |
| 209265  | 213879  | 206326  | 181981  | 203376  | NA      | 188411  | 203744  | 173905  | 193114  | 203287  | 178231  | 178219  | 182295  |
| NA      | 73217   | 118409  | 200913  | 86573   | 204531  | NA      | 103662  | 234176  | NA      | 96261   | 152599  | 341923  | 91577   |
| 599341  | 627217  | 591313  | 535687  | 654115  | 393948  | 528908  | 567422  | 548292  | 640606  | 530421  | 570188  | 519504  | 522961  |
| 218509  | 241689  | 226451  | 216467  | 218554  | 151854  | 202068  | 204045  | 228204  | 216413  | 203744  | 212395  | 225101  | 207918  |
| 246042  | 250649  | 224757  | 256484  | 240941  | 209227  | 215216  | 240020  | 234878  | 232030  | 250114  | 240229  | 238598  | 252145  |
| 225362  | 236855  | 217952  | 214026  | 215796  | 142141  | 193363  | 195112  | 202977  | 216963  | 197010  | 209850  | 214675  | 208597  |

|     |          |         |         |         |         |         |         |         |         |         |         |         |         |
|-----|----------|---------|---------|---------|---------|---------|---------|---------|---------|---------|---------|---------|---------|
| 192 | 357.9489 | 130454  | 118653  | 119202  | 101240  | 96572   | 192514  | 156280  | 119806  | 86299   | 105403  | 76624   | 101103  |
| 193 | 359.0481 | 447969  | 480041  | 297752  | 537485  | 769061  | 239047  | 271602  | 450273  | 491723  | 638266  | 895576  | 575889  |
| 194 | 364.8776 | 297429  | 298415  | 293862  | 284051  | 305147  | 269458  | 314756  | 304130  | 226755  | 227574  | 269085  | 247522  |
| 195 | 366.8746 | 179754  | 178199  | 173774  | 179667  | 189543  | 160457  | 189358  | 185417  | 140265  | 137378  | 163367  | 141485  |
| 196 | 370.9944 | 98834   | 117409  | 99571   | 67391   | 112737  | 74332   | 79581   | 82100   | NA      | 79196   | 89873   | 65048   |
| 197 | 374.9065 | 461992  | 465746  | 432626  | 433921  | 464337  | 459835  | 502840  | 457912  | 347922  | 358333  | 377273  | 363003  |
| 198 | 376.9035 | 134186  | 142928  | 118575  | 129762  | 133674  | 134259  | 144754  | 134049  | NA      | 103207  | 116561  | 104457  |
| 199 | 384.7183 | 355104  | 368198  | 346145  | 335858  | 357616  | 295253  | 356524  | 366469  | 339899  | 362513  | 358815  | 318328  |
| 200 | 384.9352 | 1878151 | 1897091 | 1849460 | 1800339 | 1803095 | 1947278 | 1991270 | 1818377 | 1545913 | 1547945 | 1543342 | 1526301 |
| 201 | 386.7153 | 351467  | 376630  | 339199  | 322575  | 359152  | 292006  | 351309  | 361427  | 346406  | 353601  | 378811  | 315036  |
| 202 | 388.7124 | 172737  | 178119  | 170641  | 156910  | 174027  | 138479  | 171621  | 175666  | 165213  | 171770  | 182384  | 146595  |
| 203 | 391.2123 | 256045  | 293672  | 273950  | 275056  | 271894  | 179438  | 258876  | 274680  | 223469  | 215434  | 248152  | 237366  |
| 204 | 394.0104 | 153951  | 144155  | 148243  | 140138  | 155037  | 90499   | 171198  | 134830  | 123553  | 136135  | 157720  | 136421  |
| 205 | 394.1076 | 196455  | 190548  | 190392  | 174271  | 182764  | 100971  | 223311  | 216924  | 189076  | 202475  | 203592  | 203674  |
| 206 | 394.7468 | 125686  | 125801  | 118604  | 117675  | 124760  | NA      | 112162  | 122736  | 114805  | 125944  | 124824  | 112284  |
| 207 | 395.0962 | 2768376 | 1359399 | 1778198 | 2690588 | 1457516 | 1645606 | 3987651 | 3112023 | 5978859 | 4902573 | 3195677 | 2548484 |
| 208 | 397.0929 | 820640  | 386532  | 503223  | 798154  | 423919  | 496338  | 1138811 | 881143  | 1784479 | 1456013 | 942820  | 750150  |

|         |         |         |         |         |         |         |         |         |         |         |         |         |         |
|---------|---------|---------|---------|---------|---------|---------|---------|---------|---------|---------|---------|---------|---------|
| 87973   | 106600  | 149825  | 121033  | 114668  | 134135  | 118274  | 129964  | 116861  | 156017  | 98470   | 105055  | 116286  | NA      |
| 396870  | 839864  | 335649  | 652456  | 372691  | 423866  | 488344  | 691135  | 625368  | 335244  | 793838  | 394608  | 403754  | NA      |
| 281340  | 280421  | 289715  | 257419  | 272656  | 293252  | 241278  | 317181  | 310816  | 310154  | 271235  | 303862  | 260185  | 276170  |
| 174977  | 162420  | 185822  | 157608  | 166334  | 189731  | 148006  | 180940  | 177969  | 183946  | 167001  | 180758  | 152486  | 167644  |
| 82781   | 78519   | 134702  | 99602   | 114304  | 78673   | 54649   | 92006   | 123442  | NA      | 100461  | 100225  | 97911   | 101328  |
| 392127  | 419539  | 455214  | 403505  | 396637  | 491582  | 407545  | 472462  | 469626  | 463646  | 419411  | 501293  | 375577  | 401692  |
| 112683  | 124502  | 135057  | NA      | 119388  | 135654  | 112948  | 138222  | 120894  | 128603  | 122019  | 147702  | 102339  | 123839  |
| 374348  | 389764  | 311469  | 379003  | 357346  | 314005  | 384948  | 390621  | 395829  | 328404  | 380973  | 327655  | 369036  | 285403  |
| 1708519 | 1806193 | 1657598 | 1734804 | 1774911 | 1882209 | 1604989 | 1953031 | 1869667 | 1948227 | 1794358 | 2001588 | 1666900 | 1628234 |
| 357936  | 401234  | 298370  | 378127  | 346305  | 312699  | 398231  | 378969  | 380434  | 329211  | 374867  | 323418  | 380699  | 284283  |
| 182614  | 184261  | 136620  | 171671  | 165621  | 157332  | 189594  | 180045  | 179890  | 151267  | 172959  | 156988  | 179482  | 143832  |
| 269879  | 239592  | 246660  | 210833  | 263276  | 251917  | 239118  | 256957  | 272209  | 268929  | 240951  | 228724  | 207646  | 233806  |
| 142835  | 133950  | 190342  | 164008  | 159784  | 135059  | 130271  | 164582  | 146945  | 150568  | 145729  | 169668  | 154836  | 148131  |
| 182774  | 202035  | 192570  | 173453  | 219949  | 234017  | 191539  | 212099  | 197458  | 235552  | 211569  | 173286  | 137949  | 214077  |
| 127313  | 125663  | 112452  | 138683  | 117144  | 110564  | 125002  | 130129  | 144585  | 118716  | 124933  | NA      | 125902  | 107737  |
| 1541034 | 2599017 | 4149314 | 1714323 | 6522619 | 5476470 | 3465798 | 2621843 | 1843229 | 6447994 | 4660046 | 5833543 | 4154879 | 5409211 |
| 444061  | 732246  | 1285961 | 505849  | 1889758 | 1615266 | 1088306 | 773103  | 564399  | 1979418 | 1349984 | 1719968 | 1304553 | 1736112 |

|         |         |         |         |         |         |         |         |         |         |         |         |         |         |
|---------|---------|---------|---------|---------|---------|---------|---------|---------|---------|---------|---------|---------|---------|
| 147986  | 166976  | 109175  | 143809  | 168697  | 134778  | 101172  | 149350  | 120340  | 139153  | 126371  | 147330  | 120731  | 132482  |
| 409439  | 317302  | 496683  | 346863  | 303818  | 354954  | 534181  | 307274  | 400508  | 300922  | 552800  | 310271  | 710890  | 652225  |
| 319013  | 331150  | 294663  | 295926  | 304462  | 298027  | 290080  | 300152  | 309739  | 297078  | 293892  | 319404  | 293883  | 276766  |
| 194605  | 200504  | 176016  | 180480  | 181479  | 187657  | 170947  | 179340  | 188430  | 182493  | 177106  | 190712  | 179386  | 169738  |
| 94246   | 111054  | 93029   | 77825   | 74060   | 112941  | NA      | 84085   | 77213   | 119052  | 119086  | 103650  | 123831  | 90831   |
| 505001  | 504878  | 453040  | 437716  | 537890  | 459881  | 444837  | 486629  | 473925  | 458215  | 478446  | 484177  | 490406  | 450524  |
| 145306  | 140154  | 131742  | 123963  | 162702  | 139352  | 131686  | 131255  | 138710  | 129740  | 134110  | 142676  | 134226  | 129003  |
| 304522  | 356456  | 339409  | 369851  | 318888  | 321502  | 342578  | 358774  | 340959  | 400703  | 391996  | 386485  | 510621  | 379755  |
| 1944141 | 1903124 | 1857539 | 1873489 | 2093475 | 1778830 | 1705921 | 1965425 | 1909503 | 1884597 | 1942264 | 2079522 | 2085489 | 1808013 |
| 305602  | 341837  | 331884  | 377574  | 299731  | 341985  | 328875  | 339545  | 342077  | 362407  | 371731  | 374244  | 480676  | 378653  |
| 147780  | 161175  | 160720  | 185161  | 148002  | 159488  | 163065  | 168824  | 162269  | 185185  | 190735  | 178181  | 226236  | 172437  |
| 270618  | 279978  | 264315  | 238939  | 190660  | 279460  | 285050  | 277266  | 281321  | 262053  | 295168  | 261458  | 229330  | 271729  |
| 151503  | 161440  | 144654  | 144911  | 120778  | 144550  | 158208  | 150737  | 142180  | 172785  | 175847  | 159455  | 179885  | 145840  |
| 195578  | 219173  | 220397  | 203005  | 178737  | 243138  | 203744  | 235917  | 252343  | 200592  | 224257  | 201192  | 142687  | 207240  |
| 107580  | 115900  | 119854  | 114379  | NA      | 113098  | 108932  | 121568  | 118757  | 128043  | 128512  | 130938  | 155752  | 128438  |
| 5189511 | 2154903 | 5031333 | 5895298 | 2221723 | 3402935 | 3903915 | 4255649 | 5965419 | 1907505 | 1689706 | 2418250 | 1433439 | 1705399 |
| 1486077 | 620541  | 1476626 | 1821499 | 658845  | 981348  | 1151799 | 1242840 | 1750098 | 562262  | 478415  | 715032  | 409546  | 475378  |

|         |         |         |         |         |         |         |         |         |         |         |         |         |         |
|---------|---------|---------|---------|---------|---------|---------|---------|---------|---------|---------|---------|---------|---------|
| 140077  | 147409  | 119806  | NA      | 106666  | 156591  | 133618  | 124923  | 185078  | 219051  | 121035  | 183565  | 119448  | 123844  |
| 430585  | 284732  | 495040  | NA      | 364852  | 405551  | 467629  | 513430  | 457007  | 162889  | 350780  | 160056  | 317478  | 320432  |
| 327744  | 326539  | 330730  | 303031  | 298479  | 353514  | 305913  | 322085  | 356185  | 308997  | 305508  | 334112  | 319786  | 322151  |
| 195491  | 193674  | 201815  | 191198  | 185189  | 211466  | 194246  | 192280  | 216044  | 207702  | 177069  | 200920  | 197434  | 173114  |
| 119667  | 76544   | 95554   | NA      | 85801   | 140373  | 84660   | 115310  | NA      | 117128  | 122022  | 134048  | 107759  | 75893   |
| 515889  | 529384  | 518594  | 473306  | 442404  | 597023  | 461317  | 519581  | 539838  | 586062  | 468940  | 501862  | 422828  | 492964  |
| 149526  | 147177  | 151936  | 141490  | 140814  | 177780  | 133822  | 145831  | 161541  | 159892  | 130325  | 145738  | 128912  | 147253  |
| 404339  | 518367  | 369299  | 296077  | 295791  | 299207  | 399879  | 337488  | 337597  | 280188  | 333785  | 340208  | 358133  | 397825  |
| 1980540 | 2268757 | 1981453 | 1797042 | 1762262 | 2246849 | 1967224 | 1919357 | 2195581 | 2192510 | 1821536 | 2134453 | 1737058 | 1936997 |
| 421329  | 527717  | 357222  | 283476  | 297761  | 294615  | 391379  | 315190  | 342022  | 266649  | 340577  | 330467  | 336504  | 400457  |
| 196104  | 255058  | 170853  | 140408  | 147746  | NA      | 190928  | 156957  | 159749  | NA      | 167966  | 161515  | 154453  | 188945  |
| 309318  | 199842  | 263582  | 270076  | 244248  | 204754  | 267560  | 272789  | 269305  | 238048  | 286324  | 273953  | 255190  | 258190  |
| 198676  | 126139  | 174393  | 152051  | 158399  | 191749  | 163694  | 166096  | 155152  | 172121  | 168147  | 177289  | 164477  | 146373  |
| 203209  | 163589  | 202468  | 171224  | 224449  | 172039  | 203744  | 200604  | 197671  | 174473  | 205697  | 196984  | 205235  | 208878  |
| 145923  | 185426  | 123416  | 114115  | 109905  | NA      | 131228  | 114443  | 123817  | NA      | 106037  | 121651  | 119533  | 131636  |
| 1732496 | 2079755 | 1765397 | 1644506 | 6641303 | 1363174 | 1512637 | 2155151 | 1168799 | 1296565 | 2326149 | 1376215 | 1609318 | 2527249 |
| 496107  | 603886  | 523632  | 499971  | 1991690 | 388009  | 432185  | 628341  | 359179  | 396905  | 715398  | 420194  | 481139  | 745348  |

|         |         |         |         |         |         |         |         |         |         |         |         |         |         |
|---------|---------|---------|---------|---------|---------|---------|---------|---------|---------|---------|---------|---------|---------|
| 140612  | 119973  | 120703  | 128374  | 124042  | 236715  | 121342  | 141746  | 173720  | 125832  | 110878  | 134747  | 145278  | 150502  |
| 417856  | 347031  | 395166  | 301793  | 417848  | 196770  | 528080  | 361078  | 205760  | 484337  | 608397  | 319816  | 432715  | 267097  |
| 324264  | 340808  | 314358  | 301407  | 317063  | 304113  | 303704  | 276287  | 305725  | 303277  | 277187  | 324440  | 346441  | 301290  |
| 195253  | 204973  | 193823  | 192025  | 199473  | 164547  | 177336  | 158765  | 183181  | 190797  | 157656  | 183300  | 213456  | 192868  |
| 120797  | 140179  | 70710   | 101941  | 89269   | 88288   | 119693  | 103338  | 114847  | 78386   | 124587  | 72996   | 85249   | 107702  |
| 487030  | 479983  | 503848  | 444115  | 464872  | 590962  | 463785  | 431940  | 464125  | 503110  | 419679  | 504968  | 520490  | 488745  |
| 138200  | 139950  | 141214  | 120337  | 149231  | 170446  | 131121  | 112245  | 138390  | 149489  | 125334  | 147176  | 145438  | 140798  |
| 376653  | 383459  | 379920  | 348526  | 360023  | 260863  | 387328  | 407542  | 344523  | 362470  | 405231  | 347013  | 336108  | 368326  |
| 2008118 | 2070010 | 1861288 | 1933167 | 1970945 | 2311377 | 1830090 | 1793193 | 1873926 | 2068162 | 1807260 | 2074479 | 2041498 | 1952644 |
| 377392  | 366309  | 401740  | 358542  | 357048  | 267185  | 393239  | 419144  | 346762  | 368939  | 402812  | 358061  | 315776  | 353259  |
| 174638  | 182039  | 182065  | 164769  | 176067  | NA      | 181718  | 193703  | 154834  | 173566  | 190818  | 161189  | 152704  | 171414  |
| 258813  | 285819  | 277093  | 283604  | 269108  | 185106  | 237497  | 262982  | 256526  | 265969  | 265686  | 255434  | 260683  | 233602  |
| 153702  | 159554  | 147172  | 175093  | 165469  | 158568  | 159214  | 154005  | 170137  | 131919  | 153887  | 137419  | 147125  | 165946  |
| 200279  | 213751  | 192603  | 181444  | 235004  | 137887  | 186212  | 196642  | 177639  | 221058  | 185419  | 194856  | 165843  | 184106  |
| 140791  | 135951  | 123946  | 113335  | 121652  | NA      | 133338  | 140901  | 122755  | 132264  | 137221  | 129619  | 112535  | 115004  |
| 1164040 | 1235246 | 914777  | 1244979 | 1561583 | 1247304 | 1470372 | 1864416 | 1398425 | 2299333 | 1220049 | 1051893 | 1340924 | 1748331 |
| 334910  | 367790  | 262220  | 365801  | 472132  | 369570  | 429786  | 546592  | 434602  | 673032  | 380229  | 303623  | 386137  | 505584  |



|     |          |        |        |        |        |        |        |        |        |        |        |        |        |
|-----|----------|--------|--------|--------|--------|--------|--------|--------|--------|--------|--------|--------|--------|
| 209 | 400.9092 | 151300 | 135284 | 140669 | 148430 | 115117 | 170325 | 186342 | 147449 | 116800 | 123903 | 106102 | 127964 |
| 210 | 404.776  | 116203 | 126981 | 113198 | 114619 | 120304 | NA     | NA     | 106788 | 106620 | 111845 | 107242 | 112969 |
| 211 | 406.1045 | 112222 | 78377  | 82501  | 80141  | 95818  | NA     | 73050  | 66255  | 105978 | 115032 | 95722  | 140532 |
| 212 | 407.1724 | 178555 | 119976 | 159521 | 131146 | 222173 | NA     | 177737 | 94870  | 139062 | 166454 | 228266 | 164243 |
| 213 | 411.9596 | 91124  | 84089  | NA     | 85161  | 105063 | NA     | 67759  | 88355  | 96031  | 121697 | 119666 | 91905  |
| 214 | 412.1147 | 94003  | 112820 | 101877 | 77933  | 79254  | NA     | 79151  | 122633 | NA     | 61024  | 112821 | 109743 |
| 215 | 414.8046 | 130355 | 133040 | 126146 | 131707 | 138404 | NA     | NA     | 127504 | 111345 | 106967 | 119662 | 110410 |
| 216 | 422.8366 | 140587 | 143283 | 143795 | 143245 | 140790 | 123569 | 144668 | 141707 | 111061 | 109526 | 125502 | 112750 |
| 217 | 424.834  | 134346 | 132528 | 141188 | 126237 | 130589 | NA     | 135550 | 140593 | 99743  | 104174 | 127160 | 111716 |
| 218 | 432.8652 | 196472 | 201942 | 185545 | 188510 | 202713 | 181825 | 208786 | 197137 | 144690 | 144349 | 175457 | 154633 |
| 219 | 434.862  | 126915 | 119026 | 121208 | 119965 | 133933 | 129679 | 139082 | 127901 | 95532  | 97195  | 110162 | 99985  |
| 220 | 434.9748 | 168531 | 213647 | 193287 | 203500 | 183640 | NA     | 143454 | 157769 | 78672  | 128756 | 187070 | 182850 |
| 221 | 442.677  | 210196 | 214004 | 201378 | 191179 | 201103 | 169596 | 212895 | 210901 | 203405 | 209263 | 211509 | 189858 |
| 222 | 442.894  | 333296 | 313788 | 313831 | 316966 | 351676 | 337233 | 350019 | 327833 | 266221 | 265179 | 284859 | 268171 |
| 223 | 444.6739 | 245076 | 252514 | 242898 | 229036 | 239379 | 194968 | 249964 | 245464 | 230277 | 243335 | 251729 | 221996 |
| 224 | 446.671  | 155502 | 159475 | 146893 | 137794 | 149207 | NA     | NA     | 149906 | 141434 | 151043 | 154677 | 137562 |
| 225 | 448.3067 | 434971 | 832339 | NA     | 468201 | 835962 | 80845  | NA     | NA     | 730004 | 234119 | 601277 | 128244 |
| 226 | 448.3067 | 237778 | 426163 | NA     | 628744 | 102081 | NA     | NA     | NA     | 174143 | NA     | 203665 | NA     |

|        |        |        |        |        |        |        |        |        |        |        |        |        |        |
|--------|--------|--------|--------|--------|--------|--------|--------|--------|--------|--------|--------|--------|--------|
| 120818 | 134316 | 120495 | 118056 | 134162 | 167599 | 133423 | 129709 | 119844 | 164478 | 132491 | 188774 | 123726 | 145947 |
| 116633 | 120894 | 106223 | 119955 | 105458 | 104101 | 115184 | 123470 | 126728 | 106276 | 111040 | NA     | 104550 | 93059  |
| 107683 | 100609 | 182101 | 103044 | 137299 | 84762  | 90398  | 84781  | 120257 | 111624 | NA     | 97656  | 60056  | 115659 |
| 164325 | 114789 | 436361 | 276492 | 260520 | 99866  | 105032 | 181978 | 129960 | 151351 | 173336 | 135709 | 161498 | 232784 |
| 56234  | 130147 | 68569  | 112203 | 77579  | 93945  | 85715  | 128011 | 102662 | 74651  | 127042 | 70601  | 91257  | NA     |
| 107993 | 92823  | 74233  | 82096  | 71128  | 75156  | 91845  | 82712  | 88696  | NA     | 84721  | 97565  | NA     | NA     |
| 128366 | 128105 | 131315 | 130377 | 114909 | 129726 | 121949 | 139951 | 147814 | 123737 | 130725 | NA     | 109636 | 114484 |
| 125061 | 141272 | 141162 | 133455 | 129165 | 149177 | 118084 | 141111 | 143648 | 138823 | 135872 | 131656 | 124805 | 122366 |
| 131373 | 129762 | 129394 | 129005 | 120301 | 136655 | 114923 | 140613 | 139884 | 132734 | 129408 | NA     | 116909 | 123990 |
| 189441 | 180534 | 205757 | 181076 | 174911 | 204640 | 158555 | 207142 | 200441 | 190393 | 181907 | 209342 | 163631 | 179700 |
| 109827 | 110903 | 130409 | 111327 | 109071 | 126826 | 108099 | 137535 | 125944 | 125701 | 112975 | NA     | 109399 | 117623 |
| 208502 | 165875 | 172084 | 170427 | 132987 | 133469 | 203235 | 155835 | 206694 | 160598 | 131893 | 97011  | 83463  | NA     |
| 209855 | 233873 | 192216 | 215266 | 204016 | 188269 | 229623 | 226934 | 229437 | 198223 | 222060 | 190386 | 219416 | 182047 |
| 300722 | 293329 | 304823 | 297368 | 294740 | 342827 | 290268 | 328354 | 319473 | 342368 | 305914 | 374700 | 272706 | 304486 |
| 252767 | 277676 | 208209 | 254891 | 235384 | 212586 | 271965 | 273002 | 271131 | 213289 | 262380 | 225097 | 252615 | 208208 |
| 149323 | 165600 | 136043 | 154245 | 148238 | 129917 | 169804 | 162172 | 162803 | 135766 | 154232 | NA     | 161148 | 121420 |
| 67598  | 239037 | 981875 | NA     | 268350 | 196352 | 159067 | 465554 | 646129 | NA     | 161786 | 156956 | 266907 | 268929 |
| NA     | 218265 | 493598 | NA     | 136378 | 131521 | 81423  | 397578 | 183948 | NA     | NA     | NA     | NA     | NA     |

|        |        |        |        |        |        |        |        |        |        |        |        |        |        |
|--------|--------|--------|--------|--------|--------|--------|--------|--------|--------|--------|--------|--------|--------|
| 190317 | 147147 | 139028 | 143421 | 191213 | 197820 | 141888 | 161551 | 182914 | 154912 | 151115 | 144801 | 117681 | 152100 |
| NA     | 115416 | 105492 | 108618 | NA     | 107781 | 102607 | 104218 | 111347 | 116021 | 119945 | 114969 | 134837 | 115132 |
| 81245  | 107436 | 67460  | 101461 | NA     | 95007  | 236673 | 81678  | 72550  | 92870  | 75532  | 80615  | 176654 | 124280 |
| 129151 | 213955 | 137297 | 124618 | NA     | 132271 | 232234 | 140344 | 126497 | 249408 | 233746 | 192469 | 249490 | 146330 |
| 86915  | 82329  | 91639  | 80931  | 70476  | 85528  | 88029  | 76675  | 82110  | 67654  | 97884  | 67132  | 125255 | 124174 |
| 128309 | 115434 | 125912 | 79741  | 77384  | 126736 | 71033  | NA     | 83002  | 105384 | 99262  | 102463 | 76204  | 90308  |
| NA     | 124727 | 127636 | 122485 | NA     | 121368 | 123157 | 123568 | 125792 | 124263 | 142942 | 133264 | 138443 | 122880 |
| 143983 | 150129 | 147064 | 136198 | 129077 | 144499 | 138659 | 152420 | 144199 | 142826 | 141480 | 142566 | 149920 | 139715 |
| 132378 | 139939 | 133082 | 131536 | 119844 | 137538 | 121956 | 138257 | 138990 | 131706 | 139144 | 152781 | 146612 | 134868 |
| 197471 | 212152 | 188790 | 190698 | 221149 | 200059 | 189825 | 204908 | 203744 | 204892 | 203744 | 213998 | 196317 | 191182 |
| 128837 | 142090 | 131681 | 115712 | 147109 | 126778 | 130158 | 128524 | 124706 | 127252 | 133152 | 132427 | 125894 | 117345 |
| 203744 | 202323 | 169934 | 140381 | 151017 | 148364 | 156437 | 124378 | 139685 | 142032 | 224769 | 222414 | 205000 | 203585 |
| 186415 | 209301 | 197303 | 213812 | 189153 | 193303 | 194585 | 212164 | 204693 | 224457 | 222011 | 224038 | 297618 | 220669 |
| 351156 | 363228 | 322690 | 328722 | 394514 | 336700 | 307571 | 333463 | 333797 | 337763 | 348063 | 371315 | 351108 | 319250 |
| 216263 | 236770 | 234190 | 259975 | 214812 | 235399 | 229867 | 241198 | 227738 | 266069 | 268306 | 263763 | 335157 | 257350 |
| NA     | 158972 | 143702 | 149339 | NA     | 139475 | 142355 | 146052 | 145547 | 159008 | 161181 | 159278 | 203190 | 154295 |
| 436560 | 418372 | 386068 | 173918 | 68128  | 196552 | 276803 | 71916  | 63936  | 493226 | 284231 | 666654 | 382312 | 449264 |
| 141126 | 115203 | 108153 | 266011 | NA     | 80415  | NA     | NA     | NA     | 254287 | 161951 | 96988  | 169904 | 206132 |

|        |        |        |        |        |        |        |         |        |        |        |        |        |        |
|--------|--------|--------|--------|--------|--------|--------|---------|--------|--------|--------|--------|--------|--------|
| 127197 | 165673 | 149254 | 155215 | 139364 | 191120 | 147400 | 169490  | 168100 | 193588 | 128016 | 163654 | 129417 | 138966 |
| 127049 | 151419 | 111309 | 98878  | NA     | NA     | 117988 | 102858  | NA     | NA     | NA     | NA     | 107456 | 118805 |
| 170045 | NA     | 77605  | NA     | 141121 | 115742 | 99963  | 116067  | NA     | NA     | 103733 | 97233  | 89316  | NA     |
| 315021 | 74837  | 199650 | 159448 | 234472 | 253512 | 141915 | 190296  | 110835 | 148794 | 227954 | 236879 | 190503 | 133176 |
| 85395  | NA     | 86991  | NA     | 80812  | 95227  | 88266  | 89468   | 101337 | NA     | 63370  | NA     | 61427  | 74217  |
| 94554  | 70638  | 73088  | 108610 | 106730 | 117663 | NA     | 107554  | 96744  | 96604  | 90443  | 89872  | 108093 | NA     |
| 143708 | 162766 | 133577 | 126165 | 109485 | NA     | 132561 | 125163  | NA     | NA     | 124063 | 137175 | 114496 | 132756 |
| 167358 | 160749 | 147951 | 146564 | 128590 | NA     | 148925 | 141516  | 167958 | 152571 | 142644 | 158620 | 140665 | 152284 |
| 148200 | 166350 | 146387 | 136556 | 120652 | NA     | 141984 | 134430  | 142627 | 132404 | 134127 | 141249 | 143692 | 137774 |
| 222604 | 219569 | 220125 | 211222 | 197302 | 226815 | 193783 | 209591  | 226599 | 235971 | 203908 | 218475 | 203181 | 213031 |
| 139171 | 142499 | 135210 | 138922 | 125101 | 150729 | 132163 | 138972  | 152750 | 139950 | 129160 | 132522 | 120089 | 136357 |
| 173523 | NA     | 143681 | NA     | 122231 | 137073 | 166631 | 221054  | 253527 | 211543 | 193345 | 152408 | 121838 | 104417 |
| 237418 | 303993 | 218768 | 179988 | 177137 | NA     | 232444 | 188938  | 194533 | 170953 | 205393 | 197067 | 226523 | 225316 |
| 364992 | 383505 | 358411 | 325588 | 342458 | 442279 | 330386 | 358772  | 373399 | 398187 | 334784 | 360468 | 340366 | 347269 |
| 273162 | 365069 | 249303 | 204647 | 200032 | 212140 | 284555 | 228447  | 252149 | 190749 | 247837 | 229503 | 229215 | 271182 |
| 169743 | 213728 | 161097 | 131824 | 121087 | NA     | 163086 | 133974  | 141041 | NA     | 145462 | NA     | 143614 | 160934 |
| 257980 | 115207 | 307936 | 781074 | 529699 | 639134 | 390999 | 2041669 | NA     | 332653 | 246795 | 477742 | 577683 | 200793 |
| 88697  | NA     | 69643  | 738881 | 69408  | 241694 | 77341  | 592273  | NA     | 155749 | 94909  | 171921 | 131599 | 128501 |

|         |        |        |        |        |        |        |        |        |        |        |        |        |        |
|---------|--------|--------|--------|--------|--------|--------|--------|--------|--------|--------|--------|--------|--------|
| 137294  | 170774 | 147272 | 133531 | 140789 | 199724 | 139256 | 120178 | 139589 | 163033 | 109836 | 141053 | 149253 | 135871 |
| 120982  | 134150 | 115333 | 102216 | 124264 | NA     | NA     | 123539 | 106343 | 113616 | 122110 | NA     | NA     | 107500 |
| 89313   | 85474  | NA     | 142843 | 112709 | NA     | NA     | 113140 | 141862 | NA     | 101579 | NA     | NA     | 85129  |
| 157807  | 161020 | 120135 | 297189 | 215316 | 114154 | 176335 | 187779 | 267049 | 79252  | 215720 | 100514 | 141614 | 165460 |
| 82685   | 81776  | 91069  | NA     | 90536  | NA     | 110589 | 66367  | NA     | 97520  | 111059 | 64035  | 102402 | NA     |
| 86084   | NA     | NA     | 82156  | 106717 | 90549  | 82652  | 90233  | 110208 | 107674 | NA     | NA     | 72622  | NA     |
| 133806  | 157098 | 140101 | 126690 | 135733 | NA     | 136492 | 126833 | 128079 | 139097 | 140818 | 126662 | 126736 | 124186 |
| 152217  | 161534 | 148967 | 147902 | 153118 | NA     | 139902 | 134547 | 143321 | 147935 | 132016 | 136373 | 159921 | 143087 |
| 147328  | 161442 | 140279 | 143512 | 150042 | NA     | 134253 | 131135 | 131140 | 145171 | 122030 | 131001 | 151624 | 143382 |
| 202312  | 206643 | 219155 | 195300 | 212950 | 215546 | 202561 | 177881 | 190738 | 220000 | 179841 | 206123 | 221678 | 215564 |
| 134293  | 140484 | 140384 | 130626 | 129975 | 143403 | 125136 | 122675 | 127707 | 136020 | 114386 | 130923 | 153670 | 136401 |
| 182500  | 104619 | 108550 | 208774 | 197446 | 199769 | 121767 | 248078 | 243603 | 189759 | 164380 | 142066 | 139514 | 145670 |
| 221423  | 213590 | 233344 | 202420 | 204112 | NA     | 239408 | 232025 | 207942 | 220895 | 222656 | 205710 | 196081 | 212545 |
| 332403  | 361347 | 331161 | 334734 | 363131 | 415835 | 342472 | 311237 | 341189 | 356162 | 323429 | 373288 | 367847 | 358586 |
| 254612  | 257258 | 282133 | 246527 | 246131 | NA     | 272322 | 280742 | 237925 | 240958 | 266537 | 257122 | 218524 | 258051 |
| 155870  | 154368 | 162339 | NA     | 155685 | NA     | 166438 | 176431 | 147020 | 146138 | 165975 | 154907 | 140164 | 147584 |
| 1493495 | 177509 | 135995 | 178328 | 530180 | 858264 | 313600 | 340188 | 438554 | 341553 | 726829 | 692774 | 432143 | 554269 |
| 1014415 | 70054  | NA     | 86938  | 448557 | 386828 | NA     | 76478  | 153554 | 326263 | 353574 | 254353 | 234538 | 253388 |

|     |          |         |         |         |         |         |         |         |         |         |         |         |         |
|-----|----------|---------|---------|---------|---------|---------|---------|---------|---------|---------|---------|---------|---------|
| 228 | 452.9227 | 1464414 | 1455996 | 1369217 | 1442812 | 1394376 | 1461591 | 1552013 | 1375570 | 1191221 | 1214351 | 1254618 | 1155658 |
| 229 | 453.0551 | 1727993 | 1392631 | 1636985 | 1810005 | 1392183 | 1209904 | 2196060 | 1999714 | 2147370 | 2209974 | 2044702 | 1770124 |
| 230 | 455.052  | 1080038 | 852175  | 1024450 | 1099622 | 864648  | 772196  | 1383083 | 1244256 | 1333545 | 1401151 | 1236873 | 1114157 |
| 231 | 457.049  | 161754  | 129703  | 153157  | 172441  | 126682  | 117373  | 194185  | 190411  | 189576  | 210571  | 201128  | 150472  |
| 232 | 468.8964 | 150159  | 131251  | 134046  | 134896  | 118612  | 167776  | 181813  | 154534  | 113686  | 118277  | 99504   | 130672  |
| 233 | 474.0732 | 114843  | 94517   | 95905   | 113005  | 128800  | 76115   | NA      | 73085   | 94495   | 85096   | 119390  | 96533   |
| 234 | 476.2782 | 217058  | 143573  | 203744  | 307397  | 212664  | 107786  | 89201   | 203744  | 366999  | 264447  | 131936  | 120854  |
| 236 | 479.972  | 91018   | 108773  | 92411   | 88738   | 82418   | 162605  | 86526   | 76873   | NA      | 58794   | 75554   | 87460   |
| 239 | 486.9164 | 113979  | 108838  | 92207   | 124304  | 86829   | 111935  | 111687  | 95066   | 97936   | 96418   | 88477   | 80650   |
| 240 | 490.8243 | 116069  | 108728  | 106970  | 115933  | 123471  | NA      | 120096  | 115826  | NA      | NA      | 103085  | NA      |
| 241 | 492.8215 | 117589  | 118162  | 112146  | 115628  | 109876  | NA      | NA      | 117452  | NA      | NA      | 101008  | NA      |
| 242 | 500.2783 | 183722  | 174987  | 230883  | 346830  | 228271  | 142287  | 77188   | 230774  | 363864  | 203744  | 177277  | 123281  |
| 243 | 500.6359 | 167835  | 174539  | 154334  | 146851  | 152552  | 138391  | 167300  | 167096  | 156375  | 165416  | 176760  | 136599  |
| 244 | 500.8531 | 172284  | 174688  | 149842  | 159323  | 161620  | 178560  | 200018  | 167541  | 142068  | 134735  | 143765  | 137814  |
| 245 | 502.6331 | 214282  | 220250  | 196349  | 186435  | 192939  | 177542  | 207848  | 209941  | 204663  | 218652  | 235447  | 181974  |
| 246 | 503.0782 | 463260  | 725509  | 521648  | 865337  | 625893  | NA      | 277313  | 367136  | 111806  | 288872  | 768578  | 653746  |
| 247 | 504.6301 | 161944  | 166021  | 157698  | 144128  | 151023  | NA      | NA      | 161801  | 155086  | 157294  | 165880  | 135551  |

|         |         |         |         |         |         |         |         |         |         |         |         |         |         |
|---------|---------|---------|---------|---------|---------|---------|---------|---------|---------|---------|---------|---------|---------|
| 1283816 | 1392900 | 1352475 | 1364945 | 1335927 | 1424310 | 1279767 | 1574819 | 1446116 | 1530320 | 1360360 | 1552428 | 1323955 | 1332903 |
| 1462569 | 1856584 | 2276586 | 1537006 | 2217247 | 2219124 | 2052735 | 1948593 | 1729187 | 2221647 | 2228857 | 2134547 | 2295840 | 2181314 |
| 904652  | 1125076 | 1451047 | 934386  | 1383487 | 1396130 | 1273039 | 1237926 | 1101190 | 1394125 | 1382978 | 1314529 | 1412785 | 1347403 |
| 136176  | 175846  | 212504  | 136451  | 205990  | 209634  | 186350  | 185089  | 151436  | 195722  | 198633  | 211941  | 207047  | 216964  |
| 118812  | 129496  | 117810  | 120210  | 142911  | 164693  | 130173  | 134484  | 135204  | 162296  | 142182  | 179833  | 121866  | 119304  |
| 103630  | 92070   | 205619  | 110373  | 117576  | 91074   | 86538   | 81334   | 115367  | 76725   | 76292   | 86267   | 87648   | 101390  |
| 165450  | 111181  | 323947  | 176692  | 210620  | 192803  | 215325  | 167626  | 204414  | 203968  | 140495  | 96501   | 687612  | 194029  |
| 94770   | 72981   | 87276   | 84350   | 69353   | 67457   | 106127  | 79467   | 98805   | 91452   | 59521   | NA      | NA      | NA      |
| 81665   | 120983  | 85299   | 123620  | 97862   | 102302  | 107706  | 133059  | 99952   | 115221  | 111916  | 122587  | 89736   | 92813   |
| 101599  | 104154  | 119866  | 100965  | 94911   | 119547  | 92528   | 116707  | 116492  | 114290  | 100603  | NA      | NA      | 112601  |
| 101328  | 102692  | 117070  | 100109  | 101985  | 123834  | NA      | 118542  | 118088  | NA      | 109619  | NA      | NA      | 108392  |
| 236026  | 127403  | 225042  | 221142  | 151522  | 211905  | 290046  | 239146  | 303522  | 203520  | 153728  | 89938   | 256629  | 143639  |
| 155986  | 170417  | 145336  | 181437  | 162005  | 144920  | 195552  | 160720  | 186498  | 149087  | 171285  | NA      | 176316  | 129782  |
| 155135  | 143179  | 173344  | 157652  | 156195  | 172292  | 141751  | 166608  | 180864  | 181942  | 162653  | 197460  | 145604  | 151701  |
| 198403  | 234742  | 190851  | 236218  | 209222  | 186913  | 234274  | 214812  | 239041  | 197566  | 218704  | 190691  | 236540  | 171770  |
| 1103265 | 465401  | 374478  | 566473  | 272575  | 213827  | 810524  | 338919  | 732149  | 329059  | 292073  | 175389  | 97443   | NA      |
| 149376  | 175418  | 133028  | 167476  | 152407  | 140476  | 173329  | 168039  | 174627  | 143638  | 164451  | NA      | 163253  | 134660  |

|         |         |         |         |         |         |         |         |         |         |         |         |         |         |
|---------|---------|---------|---------|---------|---------|---------|---------|---------|---------|---------|---------|---------|---------|
| 1508047 | 1513827 | 1434252 | 1442684 | 1614821 | 1472296 | 1290357 | 1501216 | 1507097 | 1432519 | 1481640 | 1596630 | 1656524 | 1387323 |
| 2289646 | 1848546 | 2281011 | 2226101 | 1588214 | 2023885 | 2167820 | 2179832 | 2377950 | 1719664 | 1631971 | 1823825 | 1358410 | 1536207 |
| 1422865 | 1166623 | 1469975 | 1367878 | 978808  | 1265456 | 1337001 | 1369784 | 1441918 | 1041332 | 1030048 | 1155146 | 854554  | 965729  |
| 201080  | 165675  | 220716  | 205331  | 144928  | 189355  | 197830  | 204764  | 214274  | 156902  | 155004  | 162947  | 122912  | 137443  |
| 183291  | 156792  | 137222  | 152800  | 194377  | 198920  | 142562  | 166415  | 183752  | 152782  | 150247  | 135707  | 124517  | 155617  |
| 74267   | 135981  | 65778   | 69643   | NA      | 165055  | 136326  | 82115   | 81925   | 114163  | 87628   | 77489   | 138888  | 107503  |
| 216188  | 261260  | 210982  | 85621   | NA      | 100572  | 239831  | 144995  | 292463  | 153855  | 124877  | 133098  | 198816  | 176063  |
| 107988  | 119446  | 80044   | 74180   | 84553   | 74141   | 79663   | 76234   | 74985   | 73935   | 112294  | 118610  | 104928  | 99898   |
| 112098  | 123106  | 99893   | 117687  | 108254  | 111683  | 71950   | 121714  | 121918  | 101030  | 109055  | 125924  | 197709  | 100722  |
| 122707  | 125097  | 113762  | 114923  | NA      | 113124  | 106745  | 114471  | 120270  | 119437  | 103923  | 127691  | 111796  | 108904  |
| 115373  | 128812  | 113612  | 110045  | NA      | 112468  | 107497  | 115449  | 118670  | 116249  | 118848  | 128774  | 117428  | 114422  |
| 235634  | 381820  | 160844  | 90629   | 97708   | 113271  | 272807  | 145098  | 370641  | 127358  | 151944  | 104529  | 109408  | 124571  |
| NA      | 168468  | 153177  | 164782  | 138648  | 151619  | 146532  | 148563  | 148582  | 170844  | 173246  | 171741  | 245217  | 170510  |
| 186171  | 193170  | 163462  | 172748  | 201448  | 175249  | 169443  | 162959  | 159431  | 171432  | 173374  | 188719  | 181251  | 166049  |
| 175080  | 212834  | 213462  | 209459  | 183494  | 194733  | 189987  | 201426  | 202232  | 216637  | 229111  | 220141  | 314956  | 231521  |
| 606985  | 534001  | 459052  | 245407  | 262075  | 266655  | 458616  | 188654  | 307899  | 268737  | 856309  | 719338  | 853022  | 597912  |
| NA      | 153765  | 148581  | 158842  | 136741  | 147561  | 140013  | 149717  | 150597  | 151339  | 168523  | 164591  | 214772  | 169740  |



|         |         |         |         |         |         |         |         |         |         |         |         |         |         |
|---------|---------|---------|---------|---------|---------|---------|---------|---------|---------|---------|---------|---------|---------|
| 1542507 | 1998423 | 1489230 | 1473594 | 1374831 | 1700454 | 1506054 | 1460175 | 1679912 | 1830154 | 1399412 | 1754456 | 1392777 | 1516926 |
| 1722048 | 1649049 | 1564281 | 1491000 | 2193294 | 1233751 | 1523971 | 1706323 | 1359933 | 1263433 | 1820258 | 1397434 | 1428424 | 1798056 |
| 1048710 | 1054354 | 1009272 | 973241  | 1351647 | 785595  | 932718  | 1055202 | 860802  | 796980  | 1112775 | 881949  | 945866  | 1068237 |
| 153104  | 151896  | 139013  | 142478  | 213518  | 115782  | 154176  | 158068  | 120350  | 122971  | 167811  | 115650  | 134354  | 163807  |
| 138176  | 178975  | 139879  | 148943  | 138882  | 174707  | 139995  | 165171  | 173802  | 195367  | 124368  | 158915  | 127951  | 137147  |
| 144472  | 70122   | 120521  | 135038  | 140618  | 112285  | 140219  | 142952  | 76624   | 115488  | 131533  | 162478  | 96600   | 106404  |
| 162626  | 133758  | 221916  | 441206  | 360628  | 199795  | 264986  | 417908  | 115388  | 164778  | 192836  | 298863  | 441049  | 96502   |
| 96530   | 100866  | 70589   | NA      | 57190   | 75312   | 87184   | 103600  | 133576  | 128680  | 95670   | 99453   | 67738   | NA      |
| 105811  | 241847  | 109009  | 93709   | 118345  | 118641  | 114326  | 101964  | 131048  | 150281  | 95480   | 148732  | 96309   | 137989  |
| 130755  | NA      | 126703  | 116014  | 118590  | 127565  | NA      | 117733  | 142853  | 125522  | 112804  | 137740  | 119804  | 118257  |
| 134677  | NA      | 130374  | 111252  | 121273  | 132913  | 117251  | 120876  | 132547  | 124321  | 117682  | 140942  | 117639  | 119227  |
| 118331  | 79611   | 154722  | 267494  | 220548  | NA      | 179344  | 181033  | 85986   | 122838  | 183653  | 225726  | 215879  | 97531   |
| 192637  | 277646  | 165838  | 135442  | 132497  | NA      | 179745  | 158391  | 154409  | NA      | 156428  | 150031  | 160834  | 182465  |
| 204438  | 209888  | 191930  | 163550  | 168867  | 223890  | 165850  | 181530  | 199066  | 201259  | 173487  | 198023  | 174446  | 179628  |
| 244657  | 350326  | 210380  | 171506  | 179162  | NA      | 238619  | 195785  | 199576  | NA      | 203580  | 204182  | 216677  | 228684  |
| 451365  | NA      | 322885  | NA      | 218105  | 201449  | 395681  | 773524  | 650604  | 387722  | 519623  | 257590  | 225992  | 156421  |
| 179957  | 248662  | 158620  | 132300  | 130092  | NA      | 171916  | 140724  | 151128  | NA      | 148925  | NA      | 155872  | 170452  |

|         |         |         |         |         |         |         |         |         |         |         |         |         |         |
|---------|---------|---------|---------|---------|---------|---------|---------|---------|---------|---------|---------|---------|---------|
| 1514697 | 1619096 | 1496853 | 1459880 | 1540827 | 1804506 | 1468636 | 1397767 | 1506028 | 1610247 | 1371907 | 1575784 | 1603806 | 1521859 |
| 1242757 | 1311764 | 1186643 | 1246458 | 1375785 | 1129204 | 1402117 | 1615928 | 1376004 | 1742482 | 1372451 | 1189377 | 1364290 | 1511198 |
| 767801  | 808116  | 754929  | 762033  | 844331  | 705759  | 874728  | 1039064 | 886939  | 1113380 | 860876  | 780159  | 863697  | 960253  |
| 111625  | 121947  | 109889  | 113422  | 127522  | 105529  | 142018  | 143523  | 128049  | 159905  | 133892  | 115720  | 117186  | 145603  |
| 148041  | 158896  | 144158  | 134021  | 128472  | 192368  | 138119  | 122025  | 144229  | 160160  | 111032  | 131694  | 160989  | 140802  |
| 127398  | 110336  | 85725   | 139308  | 107712  | NA      | 81592   | 152197  | 120727  | 93743   | 139671  | 94960   | 103940  | 111765  |
| 232984  | 117100  | 144020  | 251994  | 200905  | 146432  | 195432  | 387405  | 186861  | 204501  | 221110  | 242273  | 397540  | 203744  |
| 94500   | NA      | NA      | 108674  | 100617  | 120518  | 64854   | 126193  | 142742  | 92764   | 81131   | 79555   | 73054   | 80230   |
| 118318  | 135251  | 113480  | 100312  | 130937  | 131557  | 113741  | 116838  | 131041  | 141741  | 114404  | 119337  | 128051  | 103312  |
| 119918  | NA      | 117811  | 118648  | 127717  | NA      | NA      | 112138  | 121493  | 116307  | 107747  | 111367  | 129298  | 122001  |
| 118040  | NA      | 115650  | 122045  | 122165  | NA      | NA      | NA      | 121745  | 116420  | 115395  | 124411  | 130999  | 134013  |
| 87557   | 75764   | 124839  | 220982  | 162602  | 131949  | 94011   | 304025  | 112801  | 110355  | 200158  | 113218  | 207135  | 193715  |
| 173316  | 159846  | 176021  | NA      | 166056  | NA      | 189717  | 182993  | 159423  | 158186  | 189391  | 169822  | 150434  | 160084  |
| 184056  | 187971  | 182859  | 171702  | 178227  | 188797  | 170324  | 166326  | 188878  | 184610  | 163050  | 190259  | 197279  | 186001  |
| 225679  | 209702  | 231366  | 200837  | 213610  | NA      | 248718  | 246844  | 209736  | 212175  | 228492  | 211330  | 194856  | 209093  |
| 423413  | 144659  | 163481  | 704049  | 578703  | 365822  | 230151  | 970863  | 850808  | 520923  | 417492  | 272073  | 253929  | 247363  |
| 165341  | 173640  | 172003  | NA      | 161792  | NA      | 181425  | 175420  | 149738  | 158117  | 176112  | 152560  | 140319  | 154091  |

|     |          |         |         |         |         |         |         |         |         |         |         |         |         |
|-----|----------|---------|---------|---------|---------|---------|---------|---------|---------|---------|---------|---------|---------|
| 248 | 510.8817 | 303301  | 306462  | 272481  | 284312  | 319111  | 309810  | 335462  | 281138  | 249487  | 238333  | 245518  | 254593  |
| 249 | 511.0138 | 259557  | 241017  | 267125  | 234846  | 243365  | 179253  | 271923  | 290884  | 315903  | 309267  | 294608  | 264706  |
| 250 | 513.0109 | 250906  | 252299  | 271799  | 230372  | 239844  | 171652  | 262884  | 289972  | 301362  | 289112  | 285320  | 250751  |
| 251 | 515.0076 | 82094   | 77030   | 86184   | 71326   | 75558   | NA      | 86267   | 92656   | 83013   | 85003   | 87436   | 85208   |
| 252 | 520.9101 | 1489064 | 1472915 | 1404048 | 1452720 | 1407734 | 1515839 | 1586545 | 1349253 | 1244091 | 1249913 | 1278701 | 1210080 |
| 253 | 524.2781 | 110626  | 93161   | 142837  | 121454  | 79497   | NA      | NA      | 114326  | 163900  | 123734  | 67960   | NA      |
| 255 | 536.884  | 157516  | 140741  | 131400  | 148616  | 117260  | 193257  | 202729  | 158650  | 125402  | 137407  | 111067  | 138610  |
| 262 | 554.9039 | 372886  | 369062  | 355360  | 351426  | 344990  | 338978  | 403446  | 359211  | 296784  | 298657  | 354447  | 301122  |
| 263 | 555.4055 | 73354   | 76280   | 65550   | 71137   | 67376   | 75087   | 75362   | 68819   | 62657   | 58156   | 64895   | 57467   |
| 264 | 558.5948 | 146895  | 143960  | 134624  | 134027  | 124490  | NA      | NA      | 141607  | 132750  | 134606  | 155072  | 116244  |
| 265 | 560.5914 | 221610  | 229760  | 207864  | 198626  | 200098  | 175897  | 210401  | 215019  | 204492  | 213538  | 248788  | 175289  |
| 266 | 562.5887 | 188912  | 195786  | 169735  | 167282  | 170003  | 142906  | 178801  | 193160  | 171967  | 198473  | 202199  | 157569  |
| 267 | 562.8911 | 100348  | 89495   | 78587   | 100569  | 79677   | 118131  | 134600  | 94160   | 89358   | 85113   | 64588   | 78717   |
| 268 | 564.3308 | 153104  | 88336   | 179735  | 266280  | 216236  | 85423   | 178450  | 184376  | 243810  | 154778  | 77112   | 132197  |
| 269 | 564.3307 | 2037938 | 1092933 | 2459911 | 3215976 | 2831552 | 1004175 | 2251808 | 2589312 | 3311828 | 2200067 | 1095060 | 1836473 |
| 274 | 578.8692 | 253806  | 257412  | 241385  | 237964  | 255567  | 246519  | 272456  | 252373  | 206569  | 208226  | 228600  | 205351  |
| 275 | 588.3307 | 616423  | 579695  | 835347  | 1227019 | 963802  | 474927  | 568256  | 889359  | 985092  | 584117  | 480108  | 757738  |
| 276 | 588.898  | 1425872 | 1444413 | 1280828 | 1427124 | 1259836 | 1350800 | 1512842 | 1364439 | 1169649 | 1208967 | 1265459 | 1099324 |

|         |         |         |         |         |         |         |         |         |         |         |         |         |         |
|---------|---------|---------|---------|---------|---------|---------|---------|---------|---------|---------|---------|---------|---------|
| 256806  | 263671  | 288104  | 277326  | 254250  | 305537  | 253868  | 311840  | 290923  | 304718  | 279053  | 340161  | 255532  | 271752  |
| 259949  | 286772  | 266775  | 262649  | 289239  | 265816  | 311262  | 278488  | 287148  | 270236  | 299638  | 250133  | 322961  | 261681  |
| 245612  | 270496  | 260034  | 260129  | 281519  | 255695  | 284129  | 277902  | 277156  | 270522  | 305550  | 230128  | 295695  | 249463  |
| 78019   | 88246   | 71910   | 74734   | 80606   | 84747   | 88223   | 85905   | 83874   | NA      | 89953   | NA      | 90275   | NA      |
| 1312741 | 1440279 | 1341071 | 1405626 | 1412354 | 1485826 | 1343316 | 1605240 | 1496219 | 1528627 | 1411206 | 1625459 | 1340926 | 1262668 |
| 118286  | 79977   | 84789   | 84134   | 63563   | 127748  | 173557  | 136663  | 139063  | 86016   | 93697   | NA      | 84864   | 60624   |
| 119028  | 134914  | 126611  | 126900  | 149730  | 179326  | 135791  | 143177  | 135690  | 180093  | 138488  | 188736  | 134820  | 132227  |
| 338422  | 353704  | 325182  | 354557  | 350912  | 367765  | 319586  | 435711  | 363506  | 394293  | 339677  | 382580  | 342061  | 337305  |
| 64981   | 61844   | 64510   | 65343   | 68325   | 72049   | 60138   | 73040   | 70090   | 71175   | 74411   | 85138   | 73319   | 57380   |
| 128691  | 162250  | 118088  | 154027  | 139134  | NA      | 155250  | 142390  | 145490  | 126506  | 154446  | NA      | 144865  | 122351  |
| 209796  | 239834  | 183365  | 241700  | 230293  | 189052  | 252337  | 222794  | 239020  | 197040  | 234266  | 193691  | 241516  | 177909  |
| 165933  | 189910  | 160465  | 213939  | 179669  | 156950  | 204372  | 185489  | 182837  | 163323  | 209080  | NA      | 202047  | 147531  |
| 77577   | 92368   | 85448   | 78302   | 95841   | 108500  | 91775   | 85724   | 83688   | 120164  | 88975   | 122901  | 83593   | 85962   |
| 103624  | 101011  | 209271  | 149186  | 105210  | 154776  | 160831  | 130462  | 101544  | 210053  | 67146   | NA      | 255350  | 79889   |
| 1567442 | 1412164 | 2675575 | 1971184 | 1484204 | 2296814 | 2295116 | 1824119 | 1365982 | 2699287 | 998373  | 713779  | 3558209 | 1129480 |
| 209058  | 227367  | 235725  | 235014  | 215007  | 271468  | 218633  | 268374  | 237052  | 263324  | 243504  | 276650  | 224572  | 237718  |
| 682512  | 482876  | 573148  | 821041  | 385171  | 686084  | 915849  | 1084980 | 696777  | 812518  | 403770  | 253367  | 506770  | 335845  |
| 1263987 | 1268036 | 1262101 | 1320048 | 1375150 | 1423663 | 1277528 | 1575250 | 1431455 | 1463171 | 1345829 | 1547042 | 1300945 | 1217941 |

|         |         |         |         |         |         |         |         |         |         |         |         |         |         |
|---------|---------|---------|---------|---------|---------|---------|---------|---------|---------|---------|---------|---------|---------|
| 314408  | 347127  | 305936  | 295460  | 353608  | 304895  | 279034  | 311181  | 289353  | 286100  | 295820  | 349039  | 326625  | 285223  |
| 267001  | 290462  | 268031  | 280804  | 187500  | 237199  | 302769  | 294522  | 312466  | 293533  | 292913  | 227985  | 290561  | 284996  |
| 261077  | 277729  | 254657  | 260356  | 191676  | 233560  | 277788  | 296504  | 289208  | 292206  | 280618  | 222964  | 274083  | 272031  |
| 71529   | 79429   | 86715   | 80500   | NA      | 82808   | 83493   | 89034   | 100709  | 88654   | 93106   | 66533   | 88940   | 83428   |
| 1492491 | 1495834 | 1458555 | 1498117 | 1643063 | 1457257 | 1276061 | 1516719 | 1482072 | 1462237 | 1538177 | 1655739 | 1704447 | 1439336 |
| 94773   | 147595  | 66086   | 90115   | NA      | 89444   | 155979  | NA      | 131651  | 78314   | 69423   | 64837   | NA      | NA      |
| 195292  | 156900  | 143961  | 146271  | 201480  | 206423  | 144881  | 166559  | 192396  | 146150  | 158861  | 154233  | 133504  | 163312  |
| 358105  | 392028  | 380340  | 372433  | 391233  | 360703  | 310376  | 409258  | 381785  | 369493  | 383614  | 427096  | 409787  | 348983  |
| 78673   | 76180   | 69843   | 77277   | 70932   | 66862   | 57929   | 72260   | 59501   | 74325   | 68779   | 87932   | 84396   | 69697   |
| NA      | 125635  | 128832  | 144690  | NA      | 128527  | 122847  | 129576  | 129379  | 146423  | 154004  | 142473  | 203196  | 146547  |
| 179526  | 201245  | 212324  | 225958  | 187369  | 204697  | 196101  | 199224  | 198866  | 236836  | 242542  | 225533  | 313978  | 224066  |
| 154438  | 185987  | 178625  | 198732  | 153705  | 159525  | 174174  | 180256  | 171931  | 195076  | 205057  | 186918  | 282312  | 197257  |
| 131275  | 109309  | 95843   | 105881  | 125039  | 120250  | 87277   | 105902  | 113330  | 106262  | 100099  | 95957   | 89071   | 102274  |
| 103836  | 154628  | 125335  | 66233   | NA      | 92217   | 132695  | 102072  | 176059  | 162669  | 98605   | 157109  | 157611  | 127564  |
| 1609410 | 1923017 | 1744308 | 1026626 | 539723  | 1355725 | 1817372 | 1284319 | 2392448 | 2255944 | 1330765 | 2055595 | 2287740 | 1872280 |
| 256787  | 264105  | 257996  | 244323  | 311623  | 286214  | 209925  | 254829  | 260095  | 225810  | 265904  | 288940  | 275336  | 225036  |
| 611765  | 1139561 | 479720  | 364292  | 285487  | 417249  | 803399  | 494519  | 1262860 | 430617  | 487794  | 514517  | 529275  | 522882  |
| 1464964 | 1455702 | 1465242 | 1431186 | 1578825 | 1352140 | 1254590 | 1447119 | 1416999 | 1402411 | 1406580 | 1486732 | 1683291 | 1390641 |

|         |         |         |         |         |         |         |         |         |         |         |         |         |         |
|---------|---------|---------|---------|---------|---------|---------|---------|---------|---------|---------|---------|---------|---------|
| 321587  | 372397  | 319305  | 304252  | 309220  | 405629  | 310339  | 310005  | 348818  | 365355  | 292017  | 337573  | 287211  | 303932  |
| 315155  | 337113  | 257705  | 223241  | 265244  | 190962  | 284471  | 266220  | 220697  | 183646  | 235986  | 239707  | 229819  | 251631  |
| 283950  | 318413  | 261284  | 230710  | 268972  | 167141  | 271164  | 246679  | 223630  | 177856  | 228783  | 232727  | 231708  | 258456  |
| 90077   | 106714  | 87634   | 69078   | 88052   | NA      | 89618   | 76998   | 67891   | NA      | 76684   | 66351   | 72729   | 75719   |
| 1612704 | 2043534 | 1543308 | 1372254 | 1349006 | 1791483 | 1489148 | 1424873 | 1770258 | 1876769 | 1394583 | 1774316 | 1402655 | 1537281 |
| 105414  | 97892   | 82006   | NA      | 146106  | NA      | 191783  | 166174  | 101599  | NA      | 108713  | 84024   | 85816   | NA      |
| 145595  | 215295  | 141556  | 150460  | 138135  | 203744  | 162596  | 161859  | 164425  | 209394  | 126105  | 168982  | 114407  | 145319  |
| 422638  | 459345  | 408548  | 362921  | 362853  | 441830  | 398048  | 354406  | 447015  | 457540  | 364452  | 454567  | 352867  | 411478  |
| 87536   | 87125   | 78194   | 68852   | 68310   | 89632   | 77132   | 72682   | 89892   | 89186   | 74203   | 76807   | 63987   | 68552   |
| 160812  | 238578  | 139216  | 114675  | 122756  | NA      | 158269  | NA      | NA      | NA      | 137574  | NA      | 138764  | 147693  |
| 257142  | 363577  | 221176  | 176287  | 185239  | NA      | 234712  | 189867  | 201713  | NA      | 212307  | 207276  | 213309  | 248075  |
| 217677  | 313394  | 194203  | 151673  | 156444  | NA      | 209687  | 161070  | 177985  | NA      | 172333  | 176439  | 180606  | 204116  |
| 90568   | 125995  | 91655   | 102602  | 87567   | 135971  | 93427   | 112711  | 114925  | 120418  | 82960   | 120164  | 85192   | 102552  |
| 143186  | 74385   | 121542  | 215472  | 193881  | 129681  | 142700  | 262878  | 132710  | 113924  | 128451  | 203307  | 259850  | 69800   |
| 1845443 | 1049681 | 1766233 | 2736978 | 2635667 | 1831726 | 1933125 | 3535875 | 1771809 | 1511650 | 1873272 | 2860724 | 3351803 | 1037015 |
| 257042  | 317922  | 275455  | 254729  | 267821  | 316694  | 267960  | 250547  | 290193  | 300919  | 217154  | 274977  | 248490  | 254459  |
| 429424  | 217482  | 512661  | 746988  | 480246  | 192529  | 525586  | 573464  | 390913  | 443025  | 641616  | 769513  | 607822  | 394173  |
| 1550869 | 1997167 | 1429216 | 1422590 | 1371250 | 1758407 | 1517522 | 1418767 | 1682523 | 1625829 | 1422164 | 1696028 | 1308397 | 1559453 |

|         |         |         |         |         |         |         |         |         |         |         |         |         |         |
|---------|---------|---------|---------|---------|---------|---------|---------|---------|---------|---------|---------|---------|---------|
| 321160  | 326546  | 324177  | 283234  | 327505  | 422889  | 329272  | 291629  | 322737  | 348283  | 292283  | 325137  | 347046  | 332387  |
| 225752  | 238185  | 253460  | 203108  | 219754  | 159408  | 263931  | 280092  | 225848  | 267446  | 287490  | 230671  | 228811  | 248865  |
| 219917  | 247104  | 251395  | 199994  | 218919  | 154639  | 249079  | 267138  | 220585  | 243004  | 278409  | 212352  | 225217  | 232991  |
| 66987   | 76762   | 79445   | 66459   | 73073   | NA      | 72096   | 79024   | 68138   | NA      | 81676   | 64621   | 75542   | 71585   |
| 1557309 | 1631243 | 1566302 | 1507662 | 1503417 | 1885419 | 1554801 | 1468107 | 1510467 | 1709544 | 1462990 | 1595017 | 1692440 | 1435534 |
| NA      | NA      | 107744  | 115392  | 63395   | NA      | NA      | 204643  | NA      | NA      | 83989   | NA      | NA      | NA      |
| 153658  | 167303  | 155032  | 131969  | 132088  | 203744  | 151562  | 125480  | 153119  | 184772  | 105424  | 149068  | 173440  | 133766  |
| 382289  | 445794  | 395457  | 371805  | 381476  | 468890  | 367300  | 383991  | 397516  | 406762  | 358479  | 410574  | 421005  | 377271  |
| 82576   | 76512   | 77723   | 73404   | 77134   | 88031   | 89379   | 78105   | 84619   | 81291   | 73261   | 83561   | 76674   | 72116   |
| 156035  | 146125  | 152902  | NA      | 148575  | NA      | 158466  | 160660  | NA      | 135464  | 166357  | 139558  | 127235  | 147352  |
| 231114  | 236267  | 233507  | 205143  | 228895  | NA      | 252335  | 249270  | 205455  | 217636  | 252802  | 217456  | 194892  | 214643  |
| 195435  | 198565  | 192531  | 186395  | 185741  | NA      | 204071  | 224288  | 177521  | 198086  | 214801  | 178840  | 167421  | 182804  |
| 101870  | 113813  | 97705   | 87041   | 86048   | 126637  | 103172  | 85416   | 97789   | 118865  | 75218   | 94229   | 116030  | 95683   |
| 136832  | 131541  | 129218  | 161558  | 138360  | 109368  | 147748  | 249123  | 229261  | 124183  | 156263  | 142707  | 297560  | 234786  |
| 1783921 | 1838952 | 1622519 | 2195756 | 2071698 | 1394745 | 1834045 | 3139806 | 2915098 | 1833841 | 2077423 | 2062807 | 4079655 | 3232270 |
| 268577  | 268910  | 262057  | 254371  | 274640  | 339896  | 278585  | 249328  | 246891  | 301995  | 239180  | 291738  | 269721  | 264066  |
| 224976  | 345004  | 559578  | 722994  | 534974  | 364721  | 332969  | 862995  | 566193  | 335263  | 762544  | 393870  | 656247  | 907850  |
| 1534731 | 1438356 | 1532795 | 1489537 | 1497891 | 1726443 | 1529961 | 1368081 | 1449185 | 1573007 | 1433310 | 1563335 | 1601597 | 1493532 |

|     |          |         |         |         |         |         |         |         |         |         |         |         |        |
|-----|----------|---------|---------|---------|---------|---------|---------|---------|---------|---------|---------|---------|--------|
| 277 | 589.3992 | 81720   | 82358   | 75373   | 88044   | 71076   | 73036   | 86201   | 86026   | 66190   | 61290   | 74548   | 60118  |
| 279 | 595.7529 | 122861  | 162743  | 101103  | 121851  | 67937   | 307487  | 77413   | 81963   | 64481   | 103497  | 86141   | 125874 |
| 280 | 596.8847 | 117447  | 111309  | 110986  | 117301  | 88026   | 130001  | 148597  | 120086  | 89060   | 106311  | 91913   | 89500  |
| 281 | 601.7769 | 181594  | 218103  | 162048  | NA      | NA      | 232770  | 115158  | 234810  | 167168  | 349900  | 229483  | 168246 |
| 282 | 602.2785 | 111554  | 125450  | 96887   | NA      | NA      | 142361  | 67634   | 139905  | 99827   | 208288  | 143501  | 106039 |
| 283 | 604.8725 | 154238  | 138071  | 124397  | 140683  | 111810  | 172018  | 203615  | 162259  | 126783  | 136941  | 105038  | 137853 |
| 286 | 612.331  | 123720  | 81127   | 225731  | 170755  | 129309  | 81635   | 68434   | 159034  | 201928  | 148222  | 73585   | 86018  |
| 287 | 617.7372 | 940179  | 296618  | 1060517 | 663168  | 1206658 | 1019633 | 655436  | 346672  | 1556852 | 1163927 | 75499   | 374439 |
| 288 | 618.2387 | 622915  | 193337  | 706012  | 442185  | 784363  | 674037  | 415738  | 229980  | 1024123 | 759865  | NA      | 249492 |
| 289 | 622.8916 | 386815  | 374499  | 388467  | 386360  | 372857  | 367317  | 406817  | 369504  | 329460  | 304098  | 350052  | 305251 |
| 290 | 623.394  | 85753   | 79504   | 73644   | 74126   | 83364   | 79505   | 96536   | 75891   | 76985   | 66780   | 73661   | 70921  |
| 292 | 630.8791 | 122740  | 122233  | 108073  | 130341  | 88617   | 138181  | 162099  | 113836  | 92041   | 106050  | 87083   | 104461 |
| 293 | 632.3184 | 126168  | 75164   | 147849  | 163908  | 154603  | 71012   | 136943  | 151723  | 153616  | 127596  | 73056   | 112460 |
| 296 | 646.857  | 199115  | 200803  | NA      | 177160  | NA      | 191975  | NA      | 194115  | 159564  | 158254  | 169999  | 162274 |
| 297 | 653.2667 | 525656  | 1126937 | 754661  | 664282  | 409462  | 1321212 | 275081  | 674705  | 398147  | 512273  | 367188  | 529574 |
| 298 | 653.7681 | 346397  | 740903  | 501954  | 421698  | 271818  | 854889  | 176808  | 438261  | 251840  | 332363  | 233309  | 360356 |
| 299 | 656.8857 | 1130546 | 1154565 | 1025360 | 1098741 | 1079231 | 1086176 | 1199184 | 1055105 | 926253  | 962326  | 1017674 | 839162 |



|         |         |        |         |         |         |         |         |         |         |         |         |         |         |
|---------|---------|--------|---------|---------|---------|---------|---------|---------|---------|---------|---------|---------|---------|
| 74465   | 81395   | 65876  | 78736   | 72562   | 72068   | 70671   | 90528   | 87506   | 75435   | 71193   | 81696   | 76099   | 69000   |
| 130889  | 68858   | 79123  | 62319   | 74742   | 90472   | 165528  | 215556  | 106328  | 140350  | 117545  | 82620   | 107333  | 82016   |
| 83575   | 115326  | 96353  | 95634   | 115909  | 126205  | 104039  | 117826  | 100465  | 135566  | 123313  | 140878  | 93647   | 109126  |
| 314478  | 164686  | 265086 | 108053  | 164480  | 213431  | 196313  | 116226  | 126421  | 210936  | 126425  | 194946  | 215909  | 288016  |
| 193701  | 105327  | 159507 | 62953   | 97734   | 121497  | 115291  | 73563   | 74890   | 124642  | 80953   | 115820  | 132606  | 181228  |
| 115578  | 142654  | 123571 | 125561  | 154563  | 162373  | 140801  | 124506  | 128669  | 159546  | 135671  | 189268  | 116314  | 138431  |
| 110120  | 115808  | 108603 | 82045   | 82150   | 177939  | 229418  | 100245  | 141553  | 121135  | 92215   | NA      | 75731   | NA      |
| 1144138 | NA      | 915270 | 882434  | 551272  | 156114  | 2129946 | 1009880 | 544181  | 1114325 | 973780  | 1033054 | 1284205 | 1116420 |
| 747505  | NA      | 638375 | 571249  | 356951  | 97333   | 1396645 | 683338  | 358611  | 752688  | 629017  | 683559  | 841969  | 705821  |
| 352013  | 357551  | 350098 | 376979  | 375059  | 360639  | 329540  | 419772  | 376251  | 407857  | 353731  | 421351  | 371536  | 333647  |
| 82588   | 83323   | 81758  | 80624   | 85812   | 87319   | 72929   | 85468   | 93082   | 97936   | 76361   | 93636   | 79812   | 73591   |
| 96482   | 106675  | 98276  | 101791  | 113396  | 134652  | 105268  | 110839  | 104959  | 134799  | 109504  | 141670  | 108585  | 109738  |
| 98903   | 92773   | 157699 | 117468  | 93828   | 134848  | 123825  | 122167  | 87864   | 161911  | 73418   | NA      | 181460  | 82409   |
| 153016  | 184743  | 186742 | NA      | 173302  | 195487  | 181168  | 209254  | NA      | 190179  | 179990  | 229827  | 178017  | 191011  |
| 651336  | 332953  | 221301 | 332088  | 425508  | 651713  | 1309263 | 1053338 | 511494  | 815514  | 611008  | 418916  | 394901  | 521638  |
| 412955  | 218041  | 145012 | 229756  | 274443  | 424599  | 846548  | 697937  | 348218  | 537767  | 391577  | 271087  | 253222  | 327792  |
| 1007899 | 1037543 | 999881 | 1056825 | 1079757 | 1098476 | 1026769 | 1270480 | 1122639 | 1179066 | 1058591 | 1243326 | 1057174 | 992309  |

|         |         |         |         |         |         |         |         |         |         |         |         |         |         |
|---------|---------|---------|---------|---------|---------|---------|---------|---------|---------|---------|---------|---------|---------|
| 80823   | 74795   | 79979   | 80261   | 91035   | 80358   | 72253   | 82368   | 78276   | 81011   | 81111   | 91747   | 90449   | 75222   |
| 181692  | 217643  | 95198   | 223169  | 89584   | NA      | 68212   | 153642  | 81679   | 309913  | 196067  | 136459  | 122479  | 129390  |
| 142578  | 112514  | 111098  | 110342  | 141215  | 140831  | 110825  | 128696  | 155134  | 112788  | 115484  | 106096  | 104824  | 114871  |
| 265662  | 153769  | 274769  | 125745  | 127707  | 248379  | 243227  | 147536  | 243082  | 182817  | 257683  | 119350  | NA      | NA      |
| 158365  | 94944   | 154530  | 71963   | 73155   | 154723  | 141376  | 91855   | 151571  | 105609  | 155358  | 70684   | NA      | NA      |
| 199423  | 154039  | 135699  | 153873  | 202063  | 191920  | 135877  | 173482  | 194893  | 148483  | 155735  | 145949  | 134671  | 154902  |
| 81744   | 128701  | 69599   | 98427   | NA      | 90779   | 184910  | NA      | 119551  | 100738  | 72048   | 109546  | 80614   | NA      |
| 185841  | 1091037 | 298661  | 1369235 | 448796  | 1417924 | 1176502 | 1417372 | 1510609 | 1144315 | 1092470 | 483017  | 831999  | 825094  |
| 118014  | 741806  | 192193  | 905231  | 300260  | 919040  | 781056  | 935249  | 972013  | 729230  | 719029  | 324022  | 534344  | 533375  |
| 389393  | 406246  | 399905  | 386623  | 421814  | 347965  | 357174  | 375017  | 361100  | 372184  | 385343  | 443318  | 447694  | 368474  |
| 89407   | 83596   | 75997   | 87173   | 94181   | 75477   | 79274   | 91041   | 86965   | 81216   | 92632   | 90902   | 86221   | 79890   |
| 158138  | 113043  | 114371  | 130707  | 150632  | 148540  | 109249  | 134297  | 143730  | 120155  | 118113  | 128247  | 115371  | 130446  |
| 110776  | 115346  | 115237  | 70078   | NA      | 90884   | 102903  | 85331   | 138431  | 134248  | 81372   | 128675  | 134405  | 119889  |
| 196864  | 204929  | 204987  | NA      | 229019  | 210876  | NA      | 202729  | 196027  | 182144  | 203373  | 211778  | 235983  | 184545  |
| 671930  | 1245879 | 696087  | 462495  | 407675  | 238028  | 392496  | 832452  | 627818  | 927077  | 825077  | 444596  | 334380  | 429570  |
| 438115  | 831006  | 458343  | 290933  | 263794  | 151497  | 254108  | 535872  | 406851  | 593862  | 529059  | 299952  | 216137  | 273790  |
| 1131034 | 1167122 | 1145898 | 1150378 | 1250122 | 1025494 | 983974  | 1124517 | 1106638 | 1116500 | 1185112 | 1189303 | 1312561 | 1089319 |

|         |         |         |         |         |         |         |         |         |         |         |         |         |         |
|---------|---------|---------|---------|---------|---------|---------|---------|---------|---------|---------|---------|---------|---------|
| 99454   | 98343   | 83308   | 88676   | 77503   | 91826   | 90337   | 83151   | 98985   | 96115   | 79759   | 85913   | 76293   | 85545   |
| 71907   | NA      | NA      | 188800  | 59792   | NA      | NA      | 163436  | 99742   | 101414  | 216383  | 167231  | 75587   | 78938   |
| 107645  | 144892  | 112508  | 104525  | 104272  | 140374  | 113547  | 132479  | 135155  | 161219  | 105523  | 129578  | 106664  | 102082  |
| 126825  | 115615  | NA      | 137304  | NA      | NA      | NA      | NA      | 122486  | 79929   | 131767  | 152164  | 214153  | 69056   |
| 71943   | 67163   | NA      | 81114   | NA      | NA      | NA      | NA      | 71158   | NA      | 75307   | 95119   | 124552  | NA      |
| 132332  | 193669  | 141728  | 147897  | 144620  | 196252  | 158220  | 168591  | 161641  | 188449  | 127296  | 187148  | 131709  | 147133  |
| 157359  | 136493  | 88502   | 74477   | 125141  | 107842  | 194311  | 246205  | 171936  | 70594   | 162049  | 116671  | 110255  | NA      |
| 1116054 | 660074  | 1540037 | 1019635 | 301623  | 569870  | 887214  | 811583  | 813649  | 1066301 | 1465734 | 1444988 | 1521316 | 888849  |
| 751548  | 430751  | 1003115 | 644592  | 187039  | 369628  | 579353  | 529311  | 549869  | 669970  | 952928  | 957006  | 961746  | 591020  |
| 432124  | 485671  | 403276  | 340680  | 340078  | 456630  | 408604  | 398760  | 458528  | 441259  | 392364  | 453305  | 377112  | 435830  |
| 93299   | 95235   | 86294   | 74671   | 71619   | 103841  | 88444   | 81508   | 98059   | 103901  | 83890   | 97005   | 73297   | 80541   |
| 115034  | 142790  | 123870  | 112933  | 112251  | 142562  | 125638  | 131215  | 138544  | 169296  | 98718   | 141124  | 108041  | 118329  |
| 116185  | 107042  | 112638  | 160333  | 157667  | 125763  | 117965  | 198348  | 115738  | 102585  | 120488  | 172713  | 187694  | 74515   |
| 208465  | 236695  | 206047  | 202880  | 197765  | 238826  | 204592  | 191612  | 244032  | 235589  | NA      | 202171  | NA      | 211202  |
| 414184  | 328031  | 79706   | 580175  | 286434  | 272042  | 143109  | 854911  | 536017  | 500561  | 928368  | 943674  | 497497  | 323327  |
| 271677  | 210264  | NA      | 387064  | 184792  | 172829  | 93321   | 564144  | 357263  | 328965  | 600089  | 629324  | 305639  | 207238  |
| 1238481 | 1518021 | 1213576 | 1079192 | 1040758 | 1368780 | 1159081 | 1144144 | 1298531 | 1294961 | 1155972 | 1324591 | 1103583 | 1224350 |

|         |         |         |         |         |         |         |         |         |         |         |         |         |         |
|---------|---------|---------|---------|---------|---------|---------|---------|---------|---------|---------|---------|---------|---------|
| 76702   | 82815   | 89363   | 75646   | 96016   | 103568  | 82289   | 83448   | 83995   | 88888   | 80890   | 91572   | 95505   | 90901   |
| 89122   | 95580   | 65418   | NA      | 80953   | 122975  | 111539  | 65950   | 154683  | NA      | 95244   | NA      | 183324  | 121564  |
| 111408  | 152151  | 117617  | 114291  | 109113  | 134009  | 121412  | 103667  | 104369  | 132886  | 85732   | 114841  | 129063  | 118149  |
| 105416  | NA      | NA      | NA      | NA      | 154157  | 119032  | 182148  | 131880  | NA      | NA      | NA      | NA      | 117829  |
| 62401   | NA      | NA      | NA      | NA      | 90400   | 66161   | 106454  | 78024   | NA      | NA      | NA      | NA      | 73343   |
| 150167  | 161444  | 151604  | 127113  | 142165  | 197179  | 141719  | 124318  | 142331  | 174140  | 113899  | 143396  | 167133  | 137807  |
| NA      | 83349   | 136173  | 166982  | 70744   | 76173   | 62654   | 184809  | 82596   | NA      | 106623  | NA      | 123932  | 129420  |
| 1206207 | 1264969 | 793911  | 625184  | 628134  | 801472  | 1128171 | 931053  | 769010  | 970176  | 1079186 | 1117421 | 1097766 | 1214184 |
| 763358  | 810322  | 516918  | 398927  | 399119  | 532789  | 718317  | 597756  | 521255  | 641156  | 691095  | 747070  | 729181  | 791333  |
| 431866  | 429016  | 428937  | 393120  | 413357  | 458124  | 415884  | 391077  | 406447  | 434541  | 370961  | 455351  | 456912  | 408768  |
| 91196   | 83781   | 96847   | 90506   | 99265   | 104214  | 85638   | 88194   | 85606   | 96975   | 91059   | 105085  | 100271  | 89719   |
| 123695  | 128625  | 115688  | 111748  | 119050  | 159206  | 122353  | 107054  | 124047  | 160795  | 92768   | 121830  | 130420  | 120824  |
| 119706  | 126801  | 106066  | 148636  | 132813  | 100337  | 118109  | 162864  | 171252  | 119903  | 123419  | 139860  | 222353  | 176122  |
| 200039  | NA      | 202597  | 207561  | 215696  | 267379  | 209180  | 204037  | NA      | 224246  | NA      | 213600  | 212447  | NA      |
| 338214  | 276894  | 225708  | 200789  | 204911  | 581620  | 345125  | 460040  | 464222  | 278498  | 475450  | 237258  | 377594  | 540554  |
| 210697  | 181856  | 144039  | 132998  | 125323  | 368100  | 227198  | 304703  | 313207  | 181104  | 308131  | 153983  | 245697  | 340700  |
| 1247204 | 1260269 | 1191412 | 1139545 | 1145222 | 1443667 | 1181018 | 1148784 | 1162671 | 1199172 | 1098486 | 1278192 | 1303841 | 1147503 |

|     |          |         |         |         |         |        |         |        |         |        |         |         |         |
|-----|----------|---------|---------|---------|---------|--------|---------|--------|---------|--------|---------|---------|---------|
| 300 | 657.3872 | 83988   | 87171   | 85911   | 74032   | 91375  | 77729   | 88717  | 79627   | 70119  | 67419   | 66415   | 68898   |
| 301 | 660.1683 | 194389  | 68283   | NA      | 61228   | 89504  | 116444  | 65265  | NA      | 154669 | 321955  | 381531  | 685116  |
| 302 | 661.2536 | 306246  | NA      | 168667  | 99249   | 501655 | 765368  | 338378 | 88576   | 383461 | 202921  | NA      | 129502  |
| 303 | 661.7553 | 223299  | NA      | 114670  | 62054   | 335961 | 513013  | 225838 | NA      | 257055 | 143478  | NA      | 80963   |
| 304 | 664.8724 | 120655  | 114234  | 104229  | 115557  | 93706  | 114159  | 157423 | 120584  | 87912  | 101182  | 82359   | 109883  |
| 305 | 671.1072 | 218274  | 321119  | 204649  | 414551  | 270816 | 352793  | 91118  | 142782  | NA     | 104214  | 373209  | 288653  |
| 306 | 672.86   | 141909  | 124828  | 118031  | 125633  | 105227 | 149618  | 184560 | 145921  | 120835 | 109216  | 99994   | 120873  |
| 307 | 673.8036 | 156936  | 115207  | 73105   | NA      | NA     | 208734  | 136162 | 156864  | 114674 | 300195  | 186578  | 161995  |
| 308 | 674.3051 | 114723  | 75270   | NA      | NA      | NA     | 140022  | 91222  | 105050  | 76838  | 204898  | 130603  | 109728  |
| 309 | 690.8793 | 338241  | 345994  | 308829  | 304830  | 326572 | 319920  | 346468 | 325027  | 295031 | 284528  | 297051  | 279037  |
| 310 | 691.3808 | 81078   | 82281   | 82234   | 66356   | 70375  | 74293   | 87813  | 74843   | 65123  | 66414   | 75861   | 66679   |
| 311 | 696.7721 | 1528806 | 3619330 | 1872301 | 2379750 | 397544 | 4260150 | 694998 | 3661570 | 989187 | 2998658 | 3633300 | 2934668 |
| 312 | 697.261  | 120232  | NA      | 190867  | 152765  | 121922 | NA      | 63516  | 124957  | 127788 | NA      | NA      | NA      |
| 313 | 697.2751 | 983012  | 2415693 | 1284436 | 1693666 | 244025 | 2550445 | 445332 | 2420763 | 542895 | 1893490 | 2468936 | 1932934 |
| 314 | 697.7626 | 105307  | 74361   | 138761  | 126380  | 91982  | 141817  | NA     | 115836  | 102396 | 81946   | NA      | NA      |
| 315 | 698.8666 | 120607  | 107610  | 106892  | 110372  | 86500  | 124580  | 147441 | 131060  | 101891 | 103327  | 99776   | 90484   |
| 316 | 707.7625 | 154869  | 243323  | 168196  | 200377  | NA     | 288745  | 71460  | 276496  | 93264  | 222381  | 279734  | 228251  |
| 317 | 708.2653 | 120277  | 162238  | 113857  | 133302  | NA     | 169847  | NA     | 173359  | NA     | 141268  | 172253  | 149779  |

|         |         |         |        |         |         |         |         |         |         |         |         |         |         |
|---------|---------|---------|--------|---------|---------|---------|---------|---------|---------|---------|---------|---------|---------|
| 77944   | 76049   | 69508   | 76912  | 73330   | 82702   | 81196   | 87596   | 73515   | 81739   | 75953   | 93112   | 77570   | 80128   |
| 82920   | 225988  | 120321  | 72984  | 100133  | 346172  | 62208   | 57614   | 71547   | 88450   | NA      | 77497   | 180794  | 159753  |
| 293573  | NA      | 586292  | 354415 | 84447   | NA      | 575053  | 305373  | 69959   | 131432  | 439636  | 341008  | 563762  | 574356  |
| 198772  | NA      | 411788  | 234392 | NA      | NA      | 382132  | 200953  | NA      | 90880   | 299626  | 234515  | 381987  | 396886  |
| 107554  | 110034  | 92271   | 95891  | 111585  | 137631  | 106679  | 115398  | 108185  | 138093  | 114280  | 147223  | 101863  | 100506  |
| 563127  | 186653  | 134364  | 241119 | 91054   | NA      | 375302  | 127498  | 321151  | 108680  | 104076  | NA      | NA      | NA      |
| 97259   | 125706  | 110120  | 111947 | 139213  | 161134  | 130974  | 128308  | 129612  | 163800  | 130876  | 169909  | 109357  | 132677  |
| 372159  | 139372  | 301740  | 118794 | 106642  | 114930  | 131463  | 109681  | 91035   | 132220  | 90492   | 167717  | 336993  | 237252  |
| 251621  | 90933   | 201886  | 82821  | 72031   | 79041   | 87843   | 74584   | 59123   | 87833   | 60388   | 107758  | 226839  | 164394  |
| 297957  | 331048  | 298413  | 323641 | 328746  | 330036  | 291479  | 386304  | 324233  | 333349  | 320211  | 361118  | 333256  | 291415  |
| 77337   | 74116   | 71396   | 74838  | 80926   | 80044   | 67611   | 90346   | 73620   | 83597   | 74430   | 84566   | 71246   | 72224   |
| 2974279 | 3313137 | 1825453 | 726197 | 2375513 | 3606232 | 2559627 | 1235836 | 1915531 | 2882290 | 1473059 | 1428627 | 1185222 | 2223858 |
| 175717  | NA      | 181901  | 76444  | NA      | 167141  | NA      | 119476  | 115661  | 213640  | NA      | 84613   | NA      | 151508  |
| 1958504 | 2163220 | 1200311 | 407293 | 1545525 | 2541624 | 1511164 | 717234  | 1264081 | 1982611 | 897330  | 866145  | 662253  | 1519629 |
| 148642  | NA      | 148810  | 74529  | NA      | 139632  | 144214  | 103065  | 100080  | 179012  | 59262   | 80208   | 78556   | 125780  |
| 85979   | 109408  | 90511   | 104329 | 124729  | 134212  | 117169  | 122456  | 108950  | 131270  | 110616  | 141990  | 108276  | 101245  |
| 244374  | 237848  | 167537  | 70462  | 203565  | 275448  | 210604  | 101848  | 162127  | 237472  | 129685  | 136583  | 103467  | 186985  |
| 159764  | 152281  | 112641  | NA     | 124465  | 184763  | 114699  | 62082   | 98718   | 160683  | 81981   | 81909   | NA      | 118572  |

|         |         |         |         |         |         |         |        |         |         |         |         |        |         |
|---------|---------|---------|---------|---------|---------|---------|--------|---------|---------|---------|---------|--------|---------|
| 81430   | 82073   | 80284   | 83577   | 87719   | 74509   | 68794   | 92765  | 76569   | 78729   | 83622   | 90536   | 96365  | 79336   |
| 99872   | 92525   | 216807  | 245515  | 111817  | 911195  | 441688  | 211710 | 789974  | NA      | 105472  | 86470   | NA     | 61355   |
| 89779   | 417663  | NA      | 388713  | NA      | 626856  | 411978  | 544325 | 398375  | 377103  | 449892  | 257901  | 237635 | 167795  |
| NA      | 282687  | NA      | 275173  | NA      | 428633  | 287157  | 365626 | 266829  | 257379  | 302946  | 180684  | 154835 | 111180  |
| 143471  | 115007  | 115082  | 122920  | 149698  | 146454  | 118579  | 136765 | 140756  | 120239  | 126285  | 115724  | 104390 | 125650  |
| 250702  | 208203  | 173055  | 79145   | 80883   | 84491   | 181850  | NA     | 108592  | 84729   | 383507  | 312086  | 389478 | 246718  |
| 176258  | 138531  | 133727  | 142135  | 185108  | 171559  | 122644  | 157610 | 176342  | 145369  | 136009  | 140211  | 113093 | 142367  |
| 450415  | 115923  | 150422  | 141351  | 123553  | 188755  | 169029  | 90277  | 179212  | 186024  | 191086  | 154907  | NA     | NA      |
| 303963  | 73973   | 101349  | 90246   | 84506   | 127860  | 116540  | NA     | 117571  | 128981  | 138926  | 100150  | NA     | NA      |
| 347838  | 351330  | 355755  | 343590  | 376682  | 290571  | 315849  | 346479 | 319216  | 346464  | 363167  | 383876  | 382745 | 328075  |
| 79949   | 89460   | 77797   | 85731   | 89020   | 69206   | 71670   | 74519  | 67814   | 79567   | 83525   | 92851   | 89184  | 73795   |
| 3779633 | 1270986 | 3461275 | 1305349 | 1802027 | 1032283 | 2250346 | 781472 | 1399035 | 1848064 | 1400023 | 1264087 | 278793 | 1022728 |
| 152363  | 178070  | 148409  | 86197   | 76379   | 136525  | 139024  | 115156 | 211544  | 145198  | 109451  | 115634  | 88267  | NA      |
| 2576778 | 840331  | 2280299 | 788073  | 1277741 | 665755  | 1501063 | 469044 | 948077  | 1109935 | 847347  | 877524  | 123410 | 591991  |
| 125944  | 143763  | 126820  | 71008   | NA      | 97516   | 110460  | 95964  | 161032  | 128242  | 96436   | 94565   | 81655  | NA      |
| 145639  | 121345  | 105741  | 120443  | 157216  | 134824  | 121217  | 128933 | 140684  | 114536  | 114001  | 120182  | 100764 | 127263  |
| 285457  | 125690  | 265420  | 118797  | 179442  | 105954  | 194638  | 76785  | 137966  | 173143  | 130631  | 117710  | NA     | 96777   |
| 193606  | 83828   | 172172  | 70286   | 116215  | 64868   | 129103  | NA     | 87757   | 93829   | 75605   | 85196   | NA     | NA      |

|        |         |        |        |        |        |         |        |         |        |         |         |        |        |
|--------|---------|--------|--------|--------|--------|---------|--------|---------|--------|---------|---------|--------|--------|
| 91948  | 99116   | 89364  | 75607  | 79419  | 104204 | 94503   | 84379  | 99152   | 97607  | 83598   | 81643   | 84902  | 94283  |
| 65826  | NA      | NA     | 93477  | 233656 | NA     | 228208  | 114511 | 91489   | 150294 | NA      | NA      | 222628 | NA     |
| 303539 | 194585  | 237071 | 354353 | 71482  | 203222 | 133982  | 202020 | 236025  | 267275 | 310158  | 368751  | 411944 | 241871 |
| 205073 | 123276  | 158372 | 242267 | NA     | 139301 | 89309   | 135846 | 162253  | 176846 | 209344  | 254507  | 276058 | 154524 |
| 115592 | 135695  | 110897 | 129182 | 106017 | 153181 | 124974  | 123002 | 132210  | 171905 | 110903  | 145413  | 116411 | 118336 |
| 162367 | 186039  | 114535 | NA     | 69723  | NA     | 138831  | 349033 | 261391  | 134165 | 204751  | 80625   | NA     | NA     |
| 130749 | 165168  | 139921 | 132279 | 124935 | 175656 | 143996  | 161577 | 161628  | 169874 | 116782  | 159511  | 125195 | 127845 |
| 92865  | 61871   | NA     | 134065 | NA     | NA     | NA      | NA     | 84691   | NA     | 90394   | 96445   | 164175 | NA     |
| NA     | NA      | NA     | 91948  | NA     | NA     | NA      | NA     | NA      | NA     | NA      | 60352   | 114513 | NA     |
| 363753 | 419751  | 379766 | 315145 | 320872 | 406867 | 361947  | 348713 | 406626  | 412876 | 326225  | 398031  | 312100 | 355362 |
| 80928  | 89504   | 91557  | 74030  | 75308  | 102453 | 79447   | 78034  | 101051  | 101578 | 87537   | 82449   | 70503  | 92514  |
| 954196 | 1098131 | 378794 | 535078 | 773630 | 277689 | 1875378 | 451956 | 1037516 | 447700 | 1490376 | 1181631 | 817882 | 894636 |
| 114850 | NA      | 118695 | 159185 | 68628  | 75101  | 85696   | 97779  | 137940  | 107979 | 116995  | 188024  | 122050 | NA     |
| 565290 | 645389  | 218726 | 328048 | 545500 | 174190 | 1215455 | 288160 | 661211  | 281354 | 987038  | 755811  | 514779 | 540392 |
| 96194  | NA      | 94173  | 128250 | 54093  | NA     | 82259   | 81432  | 104592  | 79618  | 90233   | 148617  | 102701 | NA     |
| 116064 | 157789  | 125080 | 120240 | 120322 | 150333 | 129714  | 132510 | 147125  | 149391 | 106379  | 136099  | 103745 | 119643 |
| 91018  | 114457  | NA     | NA     | 81769  | NA     | 178701  | NA     | 106271  | NA     | 139833  | 117259  | 82674  | 91396  |
| NA     | 67777   | NA     | NA     | NA     | NA     | 109402  | NA     | NA      | NA     | 85283   | 75586   | NA     | NA     |



|        |        |        |        |        |         |        |        |        |        |        |        |         |        |
|--------|--------|--------|--------|--------|---------|--------|--------|--------|--------|--------|--------|---------|--------|
| 90867  | 85984  | 92008  | 84171  | 84125  | 107663  | 93249  | 76436  | 81834  | 93171  | 85852  | 105035 | 92860   | 86072  |
| NA     | 102603 | NA     | 59647  | 118065 | 199643  | 158710 | 210854 | 279568 | 84126  | 162063 | NA     | NA      | NA     |
| 503103 | 455059 | 115645 | 178685 | 138980 | 244251  | 397843 | 309327 | 294231 | 262560 | 265293 | 324729 | 163213  | 303361 |
| 340006 | 311454 | 73497  | 120935 | 96433  | 168951  | 270840 | 197029 | 204514 | 174690 | 170984 | 214090 | 110156  | 205615 |
| 116692 | 139017 | 120191 | 127477 | 99400  | 149711  | 125242 | 104390 | 121539 | 143757 | 90042  | 124379 | 123530  | 115352 |
| 160141 | NA     | NA     | 317366 | 223797 | 128720  | NA     | 471408 | 389448 | 203752 | 172894 | 90312  | 80063   | 79912  |
| 138683 | 165579 | 139388 | 116064 | 121369 | 176270  | 142521 | 118426 | 134670 | 153010 | 101025 | 130451 | 156727  | 132338 |
| 77900  | NA     | NA     | NA     | NA     | 143175  | 103525 | 89893  | 114953 | NA     | NA     | NA     | NA      | 104405 |
| NA     | NA     | NA     | NA     | NA     | 96594   | 66308  | 59701  | 75352  | NA     | NA     | NA     | NA      | 73775  |
| 371810 | 368990 | 368897 | 354869 | 345453 | 439941  | 392055 | 355420 | 359978 | 335531 | 309598 | 352734 | 392526  | 340934 |
| 92816  | 91646  | 85848  | 91109  | 87225  | 97097   | 90124  | 81701  | 81108  | 88121  | 81792  | 87209  | 94805   | 75562  |
| 639336 | 292287 | 547831 | 440840 | 619021 | 1258603 | 394676 | 736930 | 977700 | 477786 | 500175 | 523837 | 1104237 | 967692 |
| 100942 | 136806 | 80664  | 71116  | 66404  | 153408  | 78903  | 76170  | 135466 | 75678  | 73957  | 97715  | 132374  | 104773 |
| 355070 | 146718 | 320141 | 274146 | 391511 | 831170  | 203417 | 401895 | 635460 | 254969 | 277374 | 300575 | 712686  | 574424 |
| 88369  | 104524 | NA     | NA     | NA     | 116745  | 73760  | 76940  | 101893 | NA     | 70834  | 81588  | 105894  | 95919  |
| 136940 | 134146 | 118364 | 102227 | 101299 | 136929  | 129847 | 106958 | 115070 | 135579 | 89066  | 126948 | 147804  | 115300 |
| 62351  | NA     | NA     | NA     | 64891  | 124211  | NA     | 71520  | 99155  | NA     | NA     | NA     | 104666  | 95462  |
| NA     | NA     | NA     | NA     | NA     | 82656   | NA      | NA     |

|     |          |        |        |        |        |        |         |        |         |        |         |        |         |
|-----|----------|--------|--------|--------|--------|--------|---------|--------|---------|--------|---------|--------|---------|
| 318 | 724.8733 | 912557 | 915069 | 897285 | 889524 | 876845 | 896184  | 992904 | 872000  | 779197 | 756606  | 807685 | 709293  |
| 319 | 725.3755 | 80664  | 80203  | 76908  | 75241  | 79936  | 75096   | 79859  | 74968   | 73057  | 64371   | 69329  | 59090   |
| 320 | 728.7686 | 259509 | 393673 | 299594 | 222815 | 252069 | 1525231 | 118850 | 347123  | 287043 | 214635  | 203822 | 571416  |
| 321 | 729.27   | 186928 | 266106 | 202698 | 149413 | 173181 | 1053953 | 81072  | 241099  | 202777 | 146526  | 140339 | 401183  |
| 322 | 731.3175 | 636225 | 962013 | 559933 | 213685 | 243352 | 1069079 | 535230 | 1391192 | 617168 | 1544996 | 748011 | 833814  |
| 323 | 731.8189 | 467190 | 709861 | 416953 | 153203 | 171773 | 771446  | 378828 | 988958  | 443475 | 1113967 | 531057 | 592999  |
| 324 | 732.8601 | 115569 | 97652  | 102258 | 102244 | 87255  | 108714  | 152604 | 114982  | 105647 | 94450   | 80912  | 98286   |
| 325 | 740.8477 | 129697 | 112779 | 111285 | 112678 | 90501  | 161046  | 168981 | 135114  | 107216 | 114004  | 78153  | 111413  |
| 326 | 758.867  | 276579 | 264642 | 280973 | 276209 | 285209 | 258037  | 261978 | 263070  | 223686 | 228097  | 259895 | 216315  |
| 327 | 759.3683 | 74017  | 66834  | 67999  | 70010  | 74071  | 70400   | 79987  | 65805   | 62229  | 54692   | 59104  | 57697   |
| 328 | 766.8537 | 110375 | 90961  | 98428  | 90814  | 75630  | 113128  | 140306 | 112787  | 87981  | 100986  | 87976  | 90921   |
| 329 | 771.3005 | 193056 | 155828 | 207106 | 171378 | 279856 | 346217  | 107727 | 366132  | 191201 | 210368  | 201314 | 273356  |
| 330 | 771.802  | 147474 | 118074 | 155568 | 125454 | 203888 | 251939  | 78704  | 273736  | 137721 | 148118  | 154038 | 203814  |
| 331 | 792.8609 | 711979 | 699300 | 709195 | 639804 | 665608 | 684097  | 790132 | 674686  | 605088 | 581550  | 605986 | 600005  |
| 332 | 793.3622 | 72183  | 67586  | 66001  | 59256  | 68080  | NA      | 81352  | 65375   | 58547  | 54363   | 64097  | 64366   |
| 333 | 800.848  | 103137 | 88876  | 92081  | 92584  | 76608  | 106575  | 123962 | 109080  | 88422  | 84423   | 73017  | 85281   |
| 334 | 806.8192 | 426218 | 482550 | 384498 | 140877 | 234922 | 1621706 | 399521 | 1059596 | 467547 | 843650  | 579447 | 1019711 |

|         |        |        |        |        |        |        |        |        |        |        |        |         |         |
|---------|--------|--------|--------|--------|--------|--------|--------|--------|--------|--------|--------|---------|---------|
| 818021  | 876049 | 817869 | 860661 | 902254 | 886474 | 812561 | 980560 | 880475 | 946216 | 858663 | 995355 | 872771  | 772298  |
| 71533   | 86172  | 69883  | 73325  | 75317  | 76861  | 67078  | 84249  | 75433  | 81832  | 79848  | 83540  | 79166   | 66933   |
| 179092  | 194029 | 57353  | 319234 | 308361 | 187130 | 524306 | 299284 | 120981 | 251347 | 546919 | 235432 | 211592  | 214362  |
| 119972  | 136802 | NA     | 213675 | 209541 | 132091 | 362841 | 206968 | 82053  | 172563 | 382939 | 156393 | 141750  | 142242  |
| 1662263 | 718745 | 772738 | 478480 | 701105 | 881244 | 941550 | 647312 | 497028 | 846276 | 540502 | 782118 | 1055416 | 1356011 |
| 1257083 | 516671 | 554647 | 348299 | 501663 | 632737 | 672033 | 475390 | 355960 | 630926 | 376327 | 552521 | 787394  | 963000  |
| 78756   | 106338 | 88879  | 101484 | 107806 | 125342 | 112537 | 112247 | 110222 | 130533 | 122276 | 132785 | 91624   | 98132   |
| 93741   | 115192 | 94009  | 107435 | 122802 | 151639 | 114178 | 107302 | 110920 | 147840 | 117818 | 161635 | 112202  | 103064  |
| 254204  | 270073 | 224676 | 272295 | 266280 | 262422 | 236444 | 323617 | 286842 | 276291 | 259653 | 304968 | 279678  | 242595  |
| 59596   | 72163  | 67342  | 78030  | 75688  | 73111  | 62801  | 78401  | 76100  | 79055  | 68852  | 75560  | 68015   | 69913   |
| 84056   | 106359 | 88992  | 95179  | 100642 | 120221 | 97721  | 113911 | 94183  | 114924 | 104594 | 133840 | 91156   | 87309   |
| 205428  | 175403 | 121501 | 179128 | 261824 | 307909 | 239432 | 127107 | 92301  | 270743 | 433958 | 213314 | 179658  | 331652  |
| 148037  | 129917 | 93166  | 131774 | 202284 | 227385 | 174045 | 95299  | 70082  | 198995 | 323096 | 163914 | 141215  | 243609  |
| 622021  | 686655 | 629199 | 649465 | 674172 | 685195 | 630285 | 774075 | 739238 | 707514 | 695143 | 780011 | 680884  | 608914  |
| 62565   | 67989  | 62954  | 60861  | 64460  | 66434  | 60609  | 85468  | 75757  | 67154  | 66526  | 72756  | 70939   | NA      |
| 80510   | 96330  | 88200  | 88580  | 101884 | 112194 | 100447 | 92349  | 92660  | 114913 | 88664  | 129300 | 89837   | 91435   |
| 765841  | 537348 | 428085 | 438338 | 653833 | 495083 | 430527 | 336190 | 156023 | 527798 | 623417 | 643294 | 751348  | 1010055 |

|         |        |         |        |        |        |         |        |         |        |        |         |         |        |
|---------|--------|---------|--------|--------|--------|---------|--------|---------|--------|--------|---------|---------|--------|
| 904070  | 958327 | 934053  | 960997 | 940861 | 834478 | 810391  | 923144 | 887707  | 893308 | 907489 | 1007462 | 1058835 | 897083 |
| 77800   | 81404  | 83438   | 79820  | 82748  | 71634  | 69257   | 86656  | 76040   | 82379  | 78032  | 84175   | 89435   | 74879  |
| 106042  | 367446 | 204912  | 355807 | 197190 | 103652 | 175042  | 133710 | 155738  | 486007 | 211743 | 173262  | 260344  | 508504 |
| 68985   | 249728 | 144920  | 244211 | 139471 | 71346  | 125869  | 93049  | 109566  | 335913 | 145140 | 119739  | 191021  | 345567 |
| 1429320 | 698318 | 1201274 | 404337 | 564836 | 988377 | 1117180 | 550845 | 1459458 | 663791 | 944948 | 567248  | 92354   | 184320 |
| 1038451 | 515899 | 863247  | 284274 | 411443 | 754563 | 793675  | 402914 | 1075272 | 462116 | 674474 | 414414  | 66492   | 134988 |
| 145288  | 119863 | 111937  | 113639 | 151035 | 136346 | 107365  | 125748 | 133363  | 113259 | 116200 | 113218  | 96929   | 115287 |
| 166444  | 123142 | 114252  | 130809 | 186881 | 161793 | 129186  | 141248 | 165425  | 120055 | 125223 | 120388  | 111812  | 128137 |
| 275828  | 281477 | 278266  | 284906 | 323738 | 255785 | 246005  | 266522 | 260113  | 265616 | 278228 | 312179  | 325708  | 250553 |
| 78654   | 64206  | 71076   | 74655  | 85900  | 61919  | NA      | 72312  | 70121   | 63609  | 65635  | 76567   | 79772   | 75819  |
| 127115  | 112008 | 121727  | 117191 | 124423 | 128503 | 109926  | 106780 | 123732  | 112192 | 108915 | 115575  | 107487  | 112443 |
| 81995   | 138152 | 244789  | 184905 | 209482 | 351210 | 365381  | 97644  | 183943  | 192277 | 135834 | 124224  | 98623   | 266681 |
| 57627   | 99922  | 181778  | 141366 | 152314 | 250692 | 264796  | 72205  | 143689  | 141154 | 99412  | 90146   | 76007   | 201648 |
| 669853  | 719346 | 738505  | 720202 | 757257 | 657773 | 626437  | 721665 | 708716  | 716223 | 732163 | 806814  | 812912  | 719201 |
| 68721   | 76990  | 66499   | 69497  | 63655  | 63964  | 57979   | 71338  | 71091   | 66766  | 67129  | 88408   | 85250   | 66939  |
| 119880  | 104141 | 92316   | 110661 | 132549 | 122972 | 92141   | 110857 | 130407  | 103644 | 105795 | 102964  | 90625   | 101721 |
| 492850  | 424616 | 582994  | 483615 | 515941 | 934343 | 827959  | 177296 | 614878  | 572284 | 414047 | 456757  | 115286  | 268755 |

|        |         |        |        |        |         |        |        |         |         |        |         |         |        |
|--------|---------|--------|--------|--------|---------|--------|--------|---------|---------|--------|---------|---------|--------|
| 998735 | 1154907 | 967976 | 829472 | 860514 | 1084672 | 971052 | 835284 | 1088404 | 1052659 | 919167 | 1056878 | 910050  | 958426 |
| 88454  | 89078   | 87561  | 71942  | 73893  | 94852   | 87017  | 72101  | 89294   | 86560   | 89019  | 92246   | 82909   | 84886  |
| 155610 | 125936  | 436617 | 128399 | 110076 | 90830   | 665907 | 197983 | 67905   | 138191  | 487691 | 277496  | 140942  | 228762 |
| 112835 | 83934   | 300274 | 81880  | 73936  | NA      | 447397 | 135350 | NA      | 94516   | 323670 | 199419  | 88892   | 165417 |
| 436868 | 279056  | NA     | 426519 | 197709 | 242312  | NA     | 264383 | 513365  | 354645  | 493041 | 663761  | 1131780 | 242096 |
| 315700 | 202291  | NA     | 321999 | 138459 | 175796  | NA     | 180052 | 365098  | 258388  | 362666 | 486074  | 852815  | 160500 |
| 112067 | 140961  | 101094 | 112183 | 104649 | 143398  | 119223 | 115338 | 143225  | 143193  | 99218  | 138456  | 91921   | 115176 |
| 115436 | 170341  | 125216 | 130838 | 118670 | 167950  | 126592 | 150523 | 149486  | 149592  | 114552 | 146820  | 101469  | 125154 |
| 291301 | 342133  | 304479 | 247211 | 254433 | 333392  | 284438 | 266557 | 329758  | 324118  | 271746 | 329027  | 268366  | 311125 |
| 81899  | 101364  | 87636  | 62206  | 67550  | 83631   | 72285  | 65747  | 98881   | 78918   | 74642  | 80891   | 70554   | 78795  |
| 101829 | 127472  | 102378 | 100326 | 98795  | 117221  | 110841 | 117720 | 142979  | 136570  | 104079 | 131795  | 102234  | 113357 |
| 113968 | 78535   | 259131 | 78370  | 106341 | 90171   | 166303 | 94634  | 72213   | 106308  | 237632 | 201249  | 269676  | 201369 |
| 84675  | 56440   | 195314 | NA     | 79432  | NA      | 125312 | 72526  | NA      | 77804   | 174929 | 148437  | 197747  | 153251 |
| 758177 | 884706  | 738469 | 699814 | 665860 | 828543  | 719284 | 711580 | 793576  | 853996  | 704634 | 807003  | 691584  | 751070 |
| 76738  | 90593   | 83787  | 62584  | 64842  | 85708   | 79508  | NA     | 84197   | 80686   | NA     | 81229   | 74271   | 78424  |
| 105030 | 128575  | 98445  | 91655  | 93927  | 122902  | 96401  | 105164 | 116960  | 129889  | 92863  | 122699  | 91635   | 105720 |
| 223380 | 114541  | 182845 | 239958 | 120494 | 112847  | 224352 | 134220 | 124115  | 142724  | 390491 | 358220  | 610852  | 226388 |

|        |        |        |        |        |         |        |        |        |         |        |         |         |        |
|--------|--------|--------|--------|--------|---------|--------|--------|--------|---------|--------|---------|---------|--------|
| 975661 | 962120 | 979878 | 945725 | 937662 | 1077026 | 961726 | 960475 | 925341 | 1004371 | 904829 | 1068095 | 1006877 | 956863 |
| 86386  | 88566  | 93898  | 81697  | 86554  | 102784  | 90702  | 81485  | 83378  | 88618   | 78828  | 86170   | 83836   | 93676  |
| 154240 | 209395 | 129185 | 191921 | 156968 | 133997  | 208718 | 163522 | 128519 | 271313  | 357492 | 192080  | 250809  | 169487 |
| 113041 | 139632 | 88059  | 131274 | 111251 | 97522   | 144156 | 110832 | 92428  | 192576  | 251353 | 129989  | 174727  | 116828 |
| 346821 | 128678 | 75697  | 96504  | 107970 | 656076  | 389985 | 638240 | 445874 | 184789  | 184528 | 207121  | 130967  | 432198 |
| 249752 | 90390  | NA     | 70216  | 75159  | 464740  | 282089 | 455235 | 329421 | 136420  | 127933 | 150911  | 90809   | 316610 |
| 112254 | 132648 | 119326 | 106511 | 109267 | 153477  | 123369 | 100877 | 120007 | 135907  | 93073  | 124205  | 127414  | 116139 |
| 120747 | 133159 | 127373 | 115455 | 107913 | 154912  | 116138 | 112387 | 129755 | 148203  | 98117  | 123503  | 128529  | 121057 |
| 311083 | 312803 | 296650 | 289120 | 305805 | 339124  | 289480 | 301841 | 287969 | 308044  | 281060 | 304137  | 312548  | 285446 |
| 76366  | 80769  | 75538  | 87496  | 91378  | 82199   | 76675  | 84208  | 73825  | 72116   | 73637  | 84689   | 82064   | 78014  |
| 116650 | 113806 | 119637 | 105024 | 109841 | 139951  | 116032 | 110198 | 110673 | 129500  | 100749 | 123300  | 117224  | 108638 |
| 255332 | 149725 | NA     | 278046 | 134028 | 97329   | 200569 | 268519 | 97118  | 190205  | 109604 | 192180  | 147892  | 90871  |
| 187407 | 111951 | NA     | 208566 | 96229  | 70431   | 156538 | 198560 | 71261  | 138279  | 87717  | 147158  | 110947  | 62095  |
| 766237 | 825965 | 777968 | 767812 | 802510 | 849281  | 746928 | 718108 | 752738 | 780162  | 687643 | 802174  | 817558  | 749352 |
| 78499  | 80668  | 80363  | 71041  | 72078  | 77382   | 71474  | 76748  | 77177  | 86121   | 71520  | 86219   | 83074   | 76786  |
| 109366 | 112495 | 98351  | 101835 | 97093  | 133044  | 108166 | 94179  | 108892 | 117442  | 81547  | 116404  | 124906  | 94655  |
| 285917 | 120847 | 62357  | 133243 | 178819 | 279265  | 349414 | 241055 | 286269 | 225507  | 175592 | 288034  | 225835  | 167385 |

|     |          |        |        |        |        |        |         |        |        |        |        |        |        |
|-----|----------|--------|--------|--------|--------|--------|---------|--------|--------|--------|--------|--------|--------|
| 335 | 807.3204 | 335384 | 378025 | 286886 | 109543 | 175166 | 1283334 | 313536 | 814108 | 353262 | 658142 | 443138 | 767893 |
| 336 | 808.8349 | 116321 | 99631  | 107913 | 105823 | 87863  | 137462  | 146712 | 120803 | 91577  | 96401  | 90081  | 96592  |
| 337 | 826.8553 | 237068 | 229035 | 226343 | 234816 | 216132 | 204485  | 253262 | 217319 | 204373 | 199982 | 231961 | 191491 |
| 338 | 827.3571 | 69723  | 64024  | 68612  | 56622  | 63074  | NA      | 82153  | 63602  | 56879  | 54476  | 68984  | NA     |
| 339 | 834.8418 | 101864 | 78100  | 89803  | 88487  | 82295  | 97002   | 124574 | 107296 | 89995  | 89013  | 87899  | 80485  |
| 340 | 860.8478 | 546871 | 561642 | 562409 | 519102 | 543999 | 546278  | 592879 | 523899 | 454331 | 443329 | 480679 | 418213 |
| 341 | 862.3959 | 176564 | 204544 | 367987 | 256338 | 139201 | 207902  | NA     | 124998 | 224222 | 77044  | 128183 | 95327  |
| 342 | 868.835  | 95782  | 79097  | 88217  | 93256  | 74957  | 107386  | 115137 | 110007 | 80213  | 69107  | 76869  | 83206  |
| 343 | 876.8223 | 94937  | 83428  | 91374  | 85814  | 70938  | 107327  | 117961 | 97773  | 73163  | 78178  | 64405  | 84979  |
| 344 | 894.8421 | 193709 | 203744 | 191915 | 199723 | 192169 | 186395  | 198357 | 185543 | 161592 | 156388 | 189172 | 148835 |
| 345 | 902.8287 | 90703  | 79707  | 82256  | 88524  | 82355  | 99783   | 106283 | 92088  | 68450  | 83359  | NA     | 74952  |
| 346 | 928.8357 | 371166 | 364742 | 387290 | 343405 | 394900 | 337771  | 380273 | 358488 | 299525 | 279692 | 342467 | 304900 |
| 347 | 936.8229 | 84532  | 81706  | 67939  | 76357  | 66321  | 81302   | 99746  | 84392  | 63520  | 71751  | NA     | 73853  |
| 348 | 942.3451 | 230917 | 244630 | 382508 | 335630 | 227463 | NA      | NA     | 156701 | 159587 | 165607 | 134875 | 140911 |
| 349 | 962.8297 | 158978 | 163304 | 176268 | 175332 | 163157 | 133271  | 176674 | 144754 | 133416 | 118751 | 144183 | 125694 |
| 350 | 970.8162 | 81252  | 73764  | NA     | 74548  | NA     | 83611   | 87955  | 83636  | 72947  | 69603  | NA     | 62036  |
| 351 | 996.8234 | 235849 | 238419 | 246386 | 210726 | 245694 | 227013  | 239462 | 206359 | 204084 | 184280 | 227845 | 188916 |

|        |        |        |        |        |        |        |        |        |        |        |        |        |        |
|--------|--------|--------|--------|--------|--------|--------|--------|--------|--------|--------|--------|--------|--------|
| 605592 | 399381 | 348595 | 343089 | 509852 | 386996 | 340574 | 246963 | 118995 | 406594 | 471631 | 500306 | 594531 | 767397 |
| 83591  | 98426  | 88979  | 91704  | 115051 | 130578 | 108425 | 95955  | 102169 | 125787 | 107286 | 142164 | 102855 | 99062  |
| 201676 | 227793 | 219193 | 233611 | 222365 | 237788 | 209590 | 250903 | 236744 | 241636 | 218099 | 249323 | 226821 | 191936 |
| 66354  | 54907  | 56676  | 60839  | NA     | 67221  | 58564  | 75567  | NA     | 64894  | 63357  | 72114  | 69950  | NA     |
| 78865  | 89819  | 81574  | 93163  | 106110 | 107504 | 91376  | 90865  | 90177  | 118738 | 95681  | 121414 | 93982  | 97463  |
| 498237 | 503556 | 515194 | 520058 | 518776 | 534054 | 505415 | 566488 | 606723 | 552155 | 522551 | 579874 | 519008 | 458745 |
| 126844 | 99562  | 124468 | 204318 | 98511  | 193759 | 470141 | 157839 | 264161 | 268332 | 172913 | 114526 | 71765  | 127427 |
| 80166  | 92205  | 71595  | 79407  | 106824 | 97379  | 83470  | 107183 | 94683  | 109530 | 87593  | 119681 | 82850  | 87281  |
| 72830  | 78975  | 76878  | 77585  | 88545  | 108290 | 89563  | 82031  | 87234  | 112195 | 93423  | 111304 | 80934  | 77465  |
| 177713 | 192960 | 177204 | 188728 | 181545 | 180772 | 169301 | 214301 | 204206 | 209656 | 175503 | 203708 | 185001 | 167262 |
| 70427  | 93187  | 73765  | 70403  | 76805  | 99480  | 82894  | 83291  | 85006  | 96020  | 87213  | 104513 | 74716  | 78749  |
| 351349 | 359264 | 355578 | 341076 | 353511 | 359785 | 331420 | 424954 | 397017 | 368484 | 356953 | 383741 | 368116 | 338564 |
| NA     | 73686  | 68467  | 70255  | 81022  | 92622  | 75496  | 80834  | 74888  | 93190  | 80592  | 93620  | 75656  | 72150  |
| 179182 | NA     | 164041 | 194408 | 154032 | 187711 | 112462 | 134530 | 278100 | 97907  | 210629 | 130234 | 94127  | 246850 |
| 127070 | 148143 | 135635 | 132424 | 145620 | 140588 | 152710 | 190285 | 168068 | 159805 | 153531 | 155266 | 157037 | 134127 |
| 68773  | 71700  | 62288  | 70695  | 72183  | 94116  | 77379  | 79929  | 75020  | 84897  | 76232  | 93407  | 74200  | 66488  |
| 216424 | 215942 | 221006 | 224997 | 221455 | 218308 | 202612 | 254410 | 245525 | 231451 | 221843 | 251403 | 221462 | 222702 |



|        |        |        |        |        |        |        |        |        |        |        |        |        |        |
|--------|--------|--------|--------|--------|--------|--------|--------|--------|--------|--------|--------|--------|--------|
| 391417 | 340496 | 463577 | 378462 | 409567 | 709380 | 647884 | 140605 | 469147 | 447324 | 326505 | 369244 | 93815  | 208552 |
| 145560 | 114551 | 99366  | 114752 | 154506 | 149206 | 102603 | 131073 | 147525 | 112694 | 118606 | 99632  | 89681  | 104561 |
| 229224 | 240401 | 237857 | 269345 | 267408 | 209942 | 202470 | 242423 | 230747 | 225502 | 255018 | 273978 | 262261 | 210353 |
| 68951  | 68370  | 68031  | 78328  | 77212  | NA     | NA     | 61024  | NA     | 69485  | 64361  | 79448  | 84511  | 65253  |
| 110157 | 107372 | 90606  | 107747 | 131081 | 96495  | 88942  | 112311 | 132066 | 113759 | 115135 | 106126 | 92801  | 101238 |
| 553362 | 542447 | 551989 | 556204 | 614258 | 491445 | 509627 | 558344 | 526980 | 521604 | 562957 | 584364 | 605084 | 507468 |
| 108870 | 245353 | 154609 | 154198 | 87464  | NA     | 116493 | 251683 | 100705 | 219213 | 195862 | 84580  | 131851 | 162799 |
| 116288 | 89681  | 91933  | 102046 | 119556 | 100318 | 103119 | 97778  | 129729 | 87851  | 96054  | 97923  | 88782  | 89751  |
| 122339 | 106556 | 85043  | 94079  | 127190 | 120279 | 84935  | 106175 | 122197 | 88969  | 96381  | 85369  | 70080  | 97085  |
| 185890 | 189697 | 205407 | 193506 | 206511 | 172783 | 158782 | 191576 | 172065 | 179983 | 189184 | 217030 | 240027 | 182988 |
| 110019 | 91955  | 87359  | 101043 | 110668 | 91108  | 75968  | 99576  | 110858 | 102077 | 81122  | 86508  | 91270  | 97374  |
| 366562 | 361728 | 394259 | 391546 | 390547 | 364201 | 344488 | 377425 | 329091 | 376085 | 383879 | 411833 | 400630 | 337356 |
| 96110  | 83521  | 84702  | 91053  | 104931 | 104379 | 74684  | 95901  | 99444  | 68154  | 82643  | 89131  | 67160  | 99276  |
| 119341 | 237245 | 97312  | 184160 | 197333 | 161266 | 159428 | 235303 | 136851 | 63845  | 109321 | NA     | 190979 | 200676 |
| 149588 | 165281 | 173732 | 165000 | 168432 | 135536 | 139463 | 172480 | 144741 | 146055 | 153761 | 184960 | 191826 | 151835 |
| 85951  | 72074  | 77359  | 78773  | 102149 | 100786 | 68344  | 87664  | 97246  | 84810  | 81567  | 88864  | 77844  | 80378  |
| 234313 | 228049 | 248307 | 251714 | 272206 | 187953 | 211109 | 245998 | 209073 | 230709 | 245847 | 276192 | 270751 | 222984 |

|        |        |        |        |        |        |        |        |        |        |        |        |        |        |
|--------|--------|--------|--------|--------|--------|--------|--------|--------|--------|--------|--------|--------|--------|
| 180911 | 88800  | 143099 | 192794 | 91101  | 89046  | 172957 | 107094 | 94807  | 104757 | 306684 | 285196 | 449155 | 171935 |
| 96154  | 140115 | 105310 | 110622 | 100975 | 146133 | 123610 | 130651 | 130781 | 134456 | 97638  | 137641 | 105398 | 120037 |
| 270767 | 283787 | 268402 | 205206 | 215986 | 289020 | 245859 | 233864 | 282709 | 271241 | 241658 | 287624 | 229067 | 271701 |
| 75965  | 85493  | 76826  | NA     | NA     | 81245  | 69259  | 62690  | 68873  | 77453  | 63120  | 86471  | 61219  | 73695  |
| 88856  | 121255 | 98261  | 107855 | 98429  | 137137 | 116464 | 95621  | 106791 | 126626 | 85947  | 122533 | 90788  | 105556 |
| 606542 | 615724 | 612078 | 540513 | 494039 | 652670 | 590748 | 540254 | 638526 | 604374 | 551853 | 613639 | 549146 | 606446 |
| 295876 | 249586 | NA     | 123474 | 179439 | 165786 | 117166 | 248480 | 220603 | 238009 | 252352 | 231606 | 72000  | 171808 |
| 90972  | 111452 | 87785  | 98816  | 78503  | 126072 | 94962  | 92277  | 118802 | 115464 | 91080  | 120844 | 87119  | 96894  |
| 79490  | 97694  | 90728  | 96090  | 89095  | 118377 | 94977  | 104183 | 108961 | 118668 | 85514  | 107974 | 83689  | 92643  |
| 205304 | 250822 | 222775 | 180709 | 183591 | 235885 | 198640 | 184245 | 229954 | 240175 | 204219 | 217899 | 177371 | 213589 |
| 81560  | 119387 | 84705  | 83306  | 83551  | 112501 | 90811  | 95252  | 115459 | 106886 | 81086  | 96432  | 76268  | 97750  |
| 412064 | 397997 | 421050 | 355435 | 334701 | 427903 | 405683 | 362747 | 412612 | 412071 | 410473 | 408369 | 381980 | 407708 |
| 78536  | 107614 | 84857  | 89250  | 74529  | 98685  | 95674  | 93002  | 95535  | 107006 | 75932  | 111022 | 67753  | 101390 |
| 83533  | 99336  | 223813 | 166971 | 328216 | 238099 | 388990 | 413122 | 152543 | 350187 | 251513 | 285771 | 170535 | 338448 |
| 170908 | 203221 | 162143 | 150524 | 142475 | 175757 | 158417 | 145132 | 172226 | 185566 | 157152 | 187760 | 164057 | 181689 |
| 69056  | 98430  | 72707  | 79677  | 79968  | 95813  | 96412  | 85857  | 89232  | 104025 | NA     | 93159  | 76363  | 90619  |
| 293671 | 282292 | 261451 | 231319 | 220711 | 282274 | 240815 | 223312 | 265915 | 291739 | 240081 | 269283 | 241603 | 242221 |

|        |        |        |        |        |        |        |        |        |        |        |        |        |        |
|--------|--------|--------|--------|--------|--------|--------|--------|--------|--------|--------|--------|--------|--------|
| 225181 | 95371  | NA     | 103069 | 145665 | 227632 | 270841 | 192702 | 230375 | 176023 | 135293 | 215827 | 178026 | 124668 |
| 108432 | 121399 | 121351 | 103013 | 96530  | 137813 | 112747 | 101650 | 118852 | 126860 | 84841  | 119063 | 115120 | 107405 |
| 267372 | 252976 | 261735 | 255874 | 255491 | 290059 | 239878 | 248501 | 243968 | 257988 | 252610 | 288892 | 276504 | 256671 |
| 72407  | 73337  | 74006  | 71239  | 75014  | 79927  | 71204  | 75151  | 67941  | 81175  | 74627  | 76828  | 75497  | 70123  |
| 97328  | 108082 | 108255 | 101408 | 94894  | 110896 | 99720  | 96868  | 95563  | 115054 | 92287  | 119276 | 109382 | 103447 |
| 596182 | 593358 | 608273 | 577743 | 579377 | 648677 | 593024 | 552276 | 545040 | 600485 | 536958 | 637292 | 610348 | 575851 |
| 122164 | 127826 | 154089 | 125671 | 109016 | 168965 | 88891  | 234955 | 126352 | 187291 | 272231 | 155551 | 188881 | 304390 |
| 82172  | 101064 | 99639  | 81769  | 87953  | 122864 | 92838  | 80115  | 94408  | 120191 | 74327  | 110812 | 112806 | 95199  |
| 82885  | 103412 | 95361  | 87652  | 78679  | 119419 | 86045  | 80494  | 87941  | 111094 | 68716  | 96474  | 94278  | 80857  |
| 212934 | 196772 | 221616 | 203912 | 201315 | 245988 | 209111 | 205773 | 205991 | 213473 | 191603 | 226829 | 204391 | 209274 |
| 93637  | 98852  | 106146 | 80504  | 81077  | 119884 | 94739  | 82908  | 92557  | 115318 | 73221  | 101153 | 99146  | 83153  |
| 399659 | 395421 | 390034 | 391328 | 394536 | 456333 | 385509 | 364033 | 361351 | 414486 | 365786 | 445775 | 414227 | 424372 |
| 87992  | 90914  | 88026  | 81043  | 75118  | 100369 | 85781  | 72198  | 88398  | 95110  | NA     | 94641  | 97131  | 83574  |
| 180111 | 276522 | 295722 | 530133 | 157531 | 109305 | 171705 | 709301 | 127688 | 288962 | 372210 | 178239 | 242719 | 330364 |
| 165436 | 175560 | 182522 | 151539 | 173328 | 211978 | 167891 | 155176 | 152953 | 168838 | 163296 | 199473 | 170598 | 153673 |
| 81181  | 87459  | 81951  | 78666  | 80216  | 102661 | 83017  | 84296  | 75832  | 91645  | NA     | 79838  | 80870  | NA     |
| 247962 | 252898 | 243545 | 256927 | 250543 | 280539 | 253791 | 239425 | 239371 | 277676 | 224074 | 290707 | 262878 | 266827 |

Table 4. Raw positively charged secondary metabolomic data as indicated by peak ID for control individuals and T2D patients.

| Peak.ID | mz_mean  | Intensity_mean | D120230  | D120231  | D120232  | D120233  | D120255  | D120259  | D120260  | D120261  | D120262  | D120263  |
|---------|----------|----------------|----------|----------|----------|----------|----------|----------|----------|----------|----------|----------|
| 1       | 100.077  | 882339         | NA       | 727342   | 213792   | 3191908  | 599250   | 322470   | NA       | 248195   | 630521   | 1302544  |
| 4       | 104.0719 | 1027223        | 650901   | 807689   | 884098   | 1082916  | 1179140  | 1065890  | 1649846  | 1673192  | 1191472  | 1829187  |
| 5       | 104.1083 | 2157845        | 2190758  | 1872554  | 2405211  | 3147358  | 1477156  | 2248112  | 1243607  | 1925832  | 1823301  | 2509181  |
| 6       | 105.0046 | 501214         | 457237   | 340399   | 767551   | 523663   | 378810   | 478444   | 611731   | 557293   | 483776   | 388250   |
| 7       | 106.9519 | 962548         | 855397   | 763450   | 870213   | 746582   | 1217294  | 984226   | 702728   | 832876   | 698847   | 983545   |
| 11      | 110.0214 | 183475         | 222101   | 152629   | 219022   | 177767   | 214608   | 166122   | 129944   | 166937   | 142767   | 143203   |
| 20      | 114.0675 | 5456107        | 5012979  | 4653268  | 4623148  | 6421136  | 4414488  | 6693177  | 5678068  | 3714549  | 4517002  | 8445377  |
| 21      | 116.0719 | 28718549       | 35181343 | 23470738 | 28222566 | 25588374 | 22623624 | 19270453 | 30194032 | 33239067 | 21775873 | 30214510 |
| 23      | 117.1036 | 438478         | NA       |
| 24      | 118.0875 | 3160711        | 2721542  | 2525549  | 3018931  | 2564696  | 3647373  | 1778497  | 4048376  | 3577879  | 1881138  | 3010078  |
| 25      | 118.0875 | 28822251       | 24335694 | 25205727 | 23980288 | 34528431 | 29043991 | 23944244 | 23723747 | 29010514 | 29143610 | 38590459 |
| 27      | 120.0668 | 641540         | 535133   | 431396   | 336272   | 382423   | 992719   | 563159   | 796945   | 868320   | 592076   | 478690   |
| 28      | 120.0821 | 2212289        | 1819418  | 1733480  | 2096824  | 2196397  | 1327611  | 1687790  | 1820524  | 1704928  | 2053726  | 2166804  |
| 29      | 121.0732 | 5741758        | 4314733  | 2886083  | 6648575  | 7758187  | 4357918  | 11221559 | 4393255  | 6242975  | 5958329  | 11920453 |
| 33      | 127.0402 | 191337         | 108775   | 128027   | 152337   | 96478    | 264822   | 156577   | 388528   | 249990   | 161796   | 155399   |

|    |          |          |          |          |          |          |          |          |          |          |          |          |
|----|----------|----------|----------|----------|----------|----------|----------|----------|----------|----------|----------|----------|
| 34 | 129.0672 | 938134   | 422453   | 1366212  | 1910760  | 630064   | 1671219  | 600953   | 487335   | 204212   | 834408   | 976046   |
| 35 | 130.0512 | 275190   | 176016   | 264212   | 193039   | 216529   | 378887   | 210182   | 343408   | 248827   | 204429   | 243752   |
| 36 | 130.0511 | 2025114  | 1621056  | 2378189  | 2053918  | 2531666  | 2014995  | 1832498  | 1498680  | 1461025  | 1588697  | 1947220  |
| 37 | 130.0876 | 1072690  | 1237286  | 856421   | 978283   | 1620754  | 1223542  | 527780   | 303790   | 691256   | 591003   | 1096788  |
| 40 | 131.5346 | 108514   | 110847   | 81476    | 99756    | 118141   | 101017   | 118766   | 55966    | 66065    | NA       | 121318   |
| 43 | 132.0045 | 815035   | 800886   | 719640   | 846933   | 835303   | 859248   | 762567   | 567466   | 569486   | 709616   | 761289   |
| 45 | 132.0669 | 128086   | 114588   | 103464   | 155460   | 179721   | NA       | 165793   | 73196    | 68121    | 116703   | 173590   |
| 46 | 132.0781 | 4350700  | 9797157  | 1345822  | 1024289  | 6181832  | 2600098  | 8697493  | 1273371  | 4313971  | 2868190  | 5516165  |
| 47 | 132.1032 | 16129082 | 13280646 | 12816818 | 13699721 | 17719306 | 14222325 | 11484827 | 15690385 | 19499814 | 14290709 | 21369218 |
| 48 | 132.1032 | 25225486 | 22671650 | 23706533 | 22353937 | 26360170 | 20334080 | 18195015 | 23703272 | 27607846 | 23666270 | 32922762 |
| 49 | 132.9995 | 415157   | 358725   | 287823   | 652294   | 417063   | 321601   | 345276   | 509735   | 438509   | 415974   | 317020   |
| 50 | 133.0331 | 182319   | 164591   | 125176   | 136841   | 126209   | 183146   | 108202   | 142875   | 142095   | 139026   | 160718   |
| 51 | 133.0984 | 576155   | 650632   | 643359   | 559650   | 773574   | 510062   | 533860   | 419330   | 245873   | 435146   | 308941   |
| 52 | 134.0283 | 196011   | 168125   | 144849   | 234236   | 215545   | 206133   | 141203   | 113261   | 154229   | 160631   | 163963   |
| 53 | 136.0431 | 271928   | 204892   | 419617   | 339059   | 354811   | 220894   | 209659   | 211536   | 159216   | 215026   | 224952   |
| 54 | 136.0761 | 170983   | 169100   | 129695   | 108098   | 149561   | 110700   | 115891   | 131930   | 131372   | 137485   | 138772   |
| 55 | 136.9535 | 159922   | 153561   | 175418   | 140312   | 177332   | 116456   | 152907   | 173755   | 142024   | 106526   | 133081   |

|    |          |         |         |         |         |         |         |         |         |         |         |         |
|----|----------|---------|---------|---------|---------|---------|---------|---------|---------|---------|---------|---------|
| 56 | 136.9535 | 162893  | 155505  | 143441  | 196460  | 163357  | 127498  | NA      | 131545  | 111387  | 161644  | 178197  |
| 57 | 136.9538 | 94449   | 103192  | 90884   | 78717   | 64597   | 95901   | 84692   | 95035   | 94552   | 95206   | 117589  |
| 58 | 136.9536 | 81346   | 72886   | NA      | 84093   | 87243   | NA      | 72724   | 63758   | 61486   | 62315   | 69286   |
| 60 | 137.0461 | 2276089 | 1629072 | 1579756 | 2160317 | 2248092 | 1072367 | 2168249 | 1411161 | 2824681 | 1163277 | 4676453 |
| 62 | 138.9068 | 1216109 | 1237139 | 1145967 | 1275012 | 1311009 | 1234829 | 1061304 | 1079291 | 1310697 | 1492661 | 1384181 |
| 64 | 140.9038 | 777416  | 780407  | 746312  | 807012  | 827481  | 782430  | 697776  | 731814  | 770178  | 916487  | 904589  |
| 66 | 144.1023 | 2976021 | 4768868 | 1686121 | 7895241 | 7679647 | 2852004 | 2028557 | NA      | 619430  | 1222330 | 1133801 |
| 67 | 144.1388 | 178617  | 182151  | 153311  | 162782  | 174301  | 188664  | 185365  | 146350  | 166506  | 165227  | 178491  |
| 69 | 145.0499 | 1489543 | 936690  | 1029153 | 1227932 | 895822  | 2016486 | 1313181 | 3090451 | 2086794 | 1492704 | 1377743 |
| 70 | 146.118  | 277046  | 230533  | 227751  | 253488  | 368983  | 313779  | 373055  | 269344  | 154356  | 214362  | 345310  |
| 72 | 147.0768 | 3197842 | 2566383 | 3310453 | 2580142 | 2974102 | 4249989 | 2723369 | 4059286 | 3163418 | 2661239 | 2923434 |
| 73 | 147.1131 | 984748  | 1033882 | 811313  | 821786  | 875797  | 887036  | 907294  | 488255  | 884412  | 1065234 | 1165674 |
| 74 | 148.0607 | 684341  | 736055  | 775685  | 718287  | 796471  | 378257  | 233621  | 305014  | 521252  | 719823  | 1109724 |
| 75 | 148.0972 | 486216  | 609269  | 646610  | 667106  | 784811  | 378890  | 579333  | 251689  | 410809  | 451704  | 714193  |
| 76 | 148.9357 | 2222653 | 2296530 | 2306061 | 2356833 | 2456829 | 2091356 | 2104802 | 2026443 | 2126432 | 2092025 | 2230751 |
| 77 | 150.0587 | 4902919 | 4254017 | 3912795 | 4118530 | 4290105 | 4886522 | 3215675 | 4710888 | 4297196 | 4002719 | 4928214 |
| 78 | 150.9327 | 702870  | 714184  | 704328  | 737298  | 764426  | 634434  | 668971  | 651608  | 695047  | 672576  | 680723  |

|     |          |          |          |          |          |          |          |          |          |          |          |          |
|-----|----------|----------|----------|----------|----------|----------|----------|----------|----------|----------|----------|----------|
| 79  | 151.0092 | 304543   | 292737   | 211558   | 499153   | 322745   | 229089   | 275978   | 378758   | 338249   | 299488   | 237828   |
| 82  | 152.0544 | 214315   | 186722   | 160529   | 179457   | 183733   | 209191   | 137994   | 204145   | 180400   | 179797   | 218968   |
| 84  | 153.0412 | 249349   | 226547   | 244817   | 320391   | 275742   | 217141   | 175158   | 223845   | 295150   | 222286   | 364130   |
| 88  | 158.1545 | 208739   | 206701   | NA       | 109737   | 185362   | 197340   | 175796   | 150356   | 151494   | 133199   | 191100   |
| 89  | 158.9644 | 10044101 | 9737222  | 8916959  | 10023737 | 9933963  | 10268229 | 9540588  | 7859348  | 8125520  | 9036874  | 9446561  |
| 91  | 160.0431 | 126158   | 107756   | NA       | 93935    | NA       | 127776   | 110743   | 108500   | 121948   | 114638   | 143797   |
| 92  | 160.1337 | 427016   | 534249   | 513538   | 859062   | 552582   | 247362   | 914982   | 232513   | 668726   | 340694   | 496132   |
| 93  | 162.1129 | 3491532  | 4186007  | 3178590  | 2392416  | 3499450  | 3071899  | 4000941  | 3188785  | 3480997  | 3928249  | 5030994  |
| 94  | 163.0604 | 1086305  | 580779   | 671766   | 799453   | 545727   | 1522634  | 866056   | 2956111  | 1930090  | 1166387  | 974103   |
| 95  | 164.9486 | 107302   | 96601    | 89852    | 82235    | 108680   | NA       | NA       | 115819   | 83253    | 89030    | 127069   |
| 96  | 165.0551 | 303369   | 293993   | 226270   | 200909   | 283567   | 206961   | 201868   | 231868   | 241345   | 253079   | 250871   |
| 97  | 166.0867 | 28804591 | 27187509 | 27420392 | 28890975 | 32680891 | 17818670 | 23851297 | 25529678 | 22160710 | 31099548 | 29499256 |
| 100 | 169.036  | 5106878  | 5803744  | 5164575  | 6285099  | 6026909  | 4469623  | 4491802  | 2746297  | 3683356  | 5433895  | 5968039  |
| 103 | 174.9384 | 776324   | 668409   | 605648   | 712024   | 604323   | 959035   | 800552   | 574098   | 626743   | 528833   | 766771   |
| 104 | 175.1194 | 492347   | 332203   | 329238   | 313352   | 437528   | 425106   | 519831   | 295140   | 339017   | 316930   | 405878   |
| 105 | 176.0746 | 166723   | 76310    | 58050    | 105648   | 66608    | NA       | NA       | 102381   | 120708   | 57240    | 107240   |
| 106 | 176.1034 | 555526   | 287722   | 511205   | 202356   | 942110   | 603369   | 1054749  | 272057   | 231484   | 322288   | 246403   |

|     |          |         |          |         |         |          |         |         |         |         |         |         |
|-----|----------|---------|----------|---------|---------|----------|---------|---------|---------|---------|---------|---------|
| 107 | 177.0874 | 293283  | 260789   | 415558  | 110451  | 186481   | 137042  | 157479  | 313487  | 420343  | NA      | 178409  |
| 108 | 178.009  | 95835   | 90325    | 96179   | 101579  | 109484   | 82004   | 89373   | NA      | NA      | 84473   | 89878   |
| 109 | 180.0661 | 571651  | 543196   | 753208  | 104587  | 1301771  | 293937  | 486550  | 526248  | 405914  | NA      | 565350  |
| 111 | 181.0725 | 922606  | 757499   | 603145  | NA      | 2110795  | NA      | NA      | 574256  | 1383510 | NA      | 485160  |
| 113 | 182.0817 | 9920823 | 10816806 | 8568206 | 7218140 | 10386120 | 7247753 | 6991690 | 8696543 | 8224702 | 9548428 | 9073638 |
| 119 | 186.1131 | 214784  | 152392   | 118504  | 109294  | NA       | 141933  | NA      | 440686  | 198537  | 164842  | 223389  |
| 121 | 187.0583 | 455685  | 337363   | 492772  | 124999  | NA       | NA      | 349917  | NA      | NA      | 167096  | 375993  |
| 122 | 188.0712 | 1689372 | 1399649  | 1329835 | 1358177 | 1923088  | 1698348 | 1010026 | 1311029 | 1602789 | 1777116 | 1821458 |
| 124 | 189.1069 | 260987  | 296755   | 221526  | 189653  | 191756   | 297825  | 207045  | 227265  | 217372  | 238575  | 234859  |
| 125 | 192.0331 | 374861  | 544562   | 223507  | 881006  | 244279   | NA      | NA      | 195082  | 328115  | 510803  | 307193  |
| 127 | 195.0883 | 1645806 | 1658789  | 792460  | NA      | 3947995  | NA      | NA      | 614465  | 2004751 | 118036  | 373915  |
| 129 | 196.1008 | 159778  | 168684   | 106857  | 137609  | 216657   | 155646  | 234311  | 93383   | 114106  | 139676  | 133342  |
| 130 | 196.8656 | 586278  | 576559   | 483712  | 621992  | 598839   | NA      | 505950  | 512490  | 581596  | 686682  | 596127  |
| 131 | 198.8626 | 567432  | 602887   | 466562  | 593827  | 572529   | NA      | 509359  | 487551  | 579224  | 651000  | 622264  |
| 133 | 203.0531 | 4763843 | 3992698  | 3786600 | 4122801 | 3418964  | 5699314 | 4582030 | 6792435 | 7819246 | 5625859 | 6089326 |
| 134 | 203.1397 | 264893  | 116771   | 325230  | NA      | 179578   | 145757  | NA      | 275933  | 162313  | NA      | NA      |
| 135 | 204.1236 | 3415987 | 3612644  | 3248994 | 4552579 | 3926597  | 1517158 | 4000484 | 3960335 | 2652850 | 4592820 | 6449369 |



|     |          |          |          |          |          |          |          |          |          |          |          |          |
|-----|----------|----------|----------|----------|----------|----------|----------|----------|----------|----------|----------|----------|
| 138 | 205.0977 | 17391330 | 14728449 | 15243989 | 14793171 | 21112869 | 18488970 | 11949913 | 12995357 | 16065421 | 18552709 | 18484853 |
| 139 | 206.8944 | 717836   | 766998   | 763314   | 726748   | 881522   | 620939   | 645057   | 668621   | 732549   | 758523   | 792502   |
| 141 | 207.9671 | 271540   | 233364   | 271593   | 339414   | 278316   | 272872   | 145545   | 198288   | 166776   | 233082   | 234857   |
| 142 | 208.8914 | 449040   | 467434   | 484227   | 422302   | 533396   | 393365   | 407110   | 420050   | 441946   | 477439   | 504898   |
| 144 | 209.0927 | 578994   | 876917   | 467288   | 687312   | 1207311  | 367860   | 522538   | 324113   | 369249   | 655492   | 469754   |
| 145 | 210.0622 | 276788   | 288826   | 268831   | 355805   | 397808   | 197838   | 216395   | 227025   | 278922   | 332588   | 323991   |
| 147 | 214.0895 | 119135   | NA       | 114271   | 117584   | 131285   | 109208   | 148917   | 80527    | 93272    | 102940   | 88767    |
| 148 | 214.09   | 116261   | 103659   | 97569    | 76394    | 92548    | 121288   | 113376   | 82909    | 91487    | 104713   | 112300   |
| 150 | 216.9232 | 2210460  | 2073742  | 2206400  | 2454406  | 2471991  | 2116130  | 2004174  | 1819343  | 1976290  | 2202664  | 2104934  |
| 151 | 218.1392 | 308419   | 433943   | 372821   | 176242   | 269886   | 237117   | 307672   | 132533   | 335292   | 376595   | 596250   |
| 152 | 218.9202 | 679983   | 657339   | 654007   | 723029   | 768446   | 673194   | 644077   | 587206   | 603739   | 639504   | 679439   |
| 153 | 219.0269 | 117436   | 76447    | 67213    | 89379    | NA       | 151777   | 112603   | 183594   | 207432   | 99590    | 142141   |
| 155 | 225.1967 | 122229   | 108610   | 90892    | 103637   | 121420   | 126579   | 110600   | 97700    | 99212    | 100667   | 115429   |
| 157 | 226.9519 | 7421658  | 7275647  | 6488597  | 7417680  | 7132092  | 7594744  | 6935030  | 6027135  | 5860788  | 6172007  | 7091875  |
| 159 | 227.1257 | 615113   | 497514   | 634296   | 651053   | 765998   | 515589   | 697270   | 686316   | 424663   | 541794   | 743644   |
| 162 | 229.9753 | 145879   | 127339   | 145151   | 114444   | 152829   | 153344   | 138922   | 121347   | 128932   | 126241   | 152474   |
| 163 | 231.1347 | 752613   | 1035703  | 515889   | 593780   | 376614   | 353862   | 184559   | 1112846  | 1119240  | 411017   | 748770   |

|     |          |        |        |        |        |        |        |         |         |         |         |         |
|-----|----------|--------|--------|--------|--------|--------|--------|---------|---------|---------|---------|---------|
| 164 | 235.1658 | 160350 | NA     | 109180 | NA     | 179940 | 125896 | 99668   | 132573  | 219627  | 176174  | 273346  |
| 165 | 235.962  | 120954 | 102870 | 109974 | 146956 | 114254 | 124380 | NA      | 73131   | 65284   | 95625   | 102160  |
| 166 | 236.072  | 752353 | 731892 | 608457 | 631463 | 689042 | 768498 | 692632  | 634396  | 683484  | 631661  | 722884  |
| 167 | 236.0723 | 100888 | 108930 | 75809  | 99670  | 87053  | 118062 | 89875   | 83804   | 100019  | 96552   | 95440   |
| 168 | 241.1035 | 589684 | 270493 | 227096 | 602027 | 446637 | 636396 | 819912  | 1505192 | 1206626 | 666557  | 852849  |
| 169 | 242.9258 | 631974 | 558995 | 508839 | 613497 | 478023 | 769802 | 614924  | 466522  | 525262  | 418324  | 655005  |
| 170 | 245.0775 | 193606 | 205681 | 148873 | 342306 | 289116 | NA     | 194968  | 109496  | NA      | 171038  | 222689  |
| 171 | 245.0775 | 198515 | 110187 | 276558 | 282959 | 274235 | 217926 | 170749  | 170730  | 162019  | 156258  | 199141  |
| 172 | 245.1867 | 178288 | NA     | NA     | NA     | NA     | NA     | NA      | NA      | NA      | NA      | NA      |
| 173 | 248.6155 | 187870 | 171886 | 115112 | 95680  | 166332 | NA     | 147669  | NA      | 101007  | 150929  | 177605  |
| 174 | 252.1084 | 925261 | 752430 | 649042 | 611717 | 414047 | 718358 | 516462  | 2939756 | 2165168 | 1173201 | 1486235 |
| 175 | 259.0932 | 504531 | 366992 | 691493 | 612667 | 780515 | 443894 | 405944  | 248398  | 227583  | 362193  | 352870  |
| 176 | 261.0118 | 364941 | 462197 | 366869 | 359930 | 413878 | 325573 | 388140  | 301058  | 344302  | 412755  | 406268  |
| 177 | 263.0088 | 99820  | 120098 | 96898  | 95712  | 104402 | 90466  | 103690  | NA      | 93197   | 109870  | 109585  |
| 178 | 265.119  | 574562 | 852359 | 244420 | 766525 | 306189 | 511985 | 1770751 | 349493  | 195320  | 276983  | 465504  |
| 179 | 269.139  | 254795 | 203076 | 163830 | 171564 | 487678 | NA     | 516727  | NA      | NA      | 162179  | 150695  |
| 181 | 274.1224 | 130987 | 117890 | NA     | 141637 | 140321 | 128296 | 193334  | 103128  | 127468  | 146137  | 194676  |

|     |          |         |         |         |         |         |         |         |         |         |         |         |
|-----|----------|---------|---------|---------|---------|---------|---------|---------|---------|---------|---------|---------|
| 182 | 274.2747 | 791802  | 710787  | 664848  | 727200  | 798158  | 917144  | 734032  | 613857  | 617101  | 701649  | 789240  |
| 183 | 274.8817 | 570793  | 566352  | 567989  | 592486  | 624737  | NA      | 536931  | 505105  | 550862  | 537672  | 524966  |
| 184 | 276.1199 | 329822  | 249920  | 394931  | 213185  | 361034  | 318480  | 273734  | 271724  | 190003  | 191417  | 282179  |
| 185 | 279.1711 | 299454  | 252466  | 321488  | 255286  | 240456  | NA      | NA      | 134457  | 115999  | 115401  | 119581  |
| 186 | 279.9884 | 231540  | 184751  | 210361  | 302368  | 209251  | 224067  | 92630   | 164687  | 148457  | 210737  | 232578  |
| 187 | 280.1399 | 500634  | 227397  | 170893  | 215169  | 201557  | 558426  | 252265  | 1842389 | 805116  | 442573  | 629057  |
| 188 | 281.114  | 340565  | 250267  | 342789  | 381219  | 378942  | NA      | NA      | 205423  | 124382  | 100489  | NA      |
| 189 | 282.1191 | 226530  | 126023  | 110326  | NA      | NA      | 407654  | 230226  | 820934  | 494522  | 194981  | 147268  |
| 191 | 284.9106 | 1116702 | 1144912 | 1119064 | 1186614 | 1289931 | 1114367 | 1106548 | 857403  | 868922  | 1089180 | 1115086 |
| 192 | 286.9076 | 325274  | 316521  | 336850  | 341716  | 350190  | 334865  | 299221  | 264442  | 254046  | 310217  | 295324  |
| 193 | 287.6516 | 387156  | 691095  | 789238  | 468883  | 359866  | 149784  | 531233  | 308760  | 416314  | 842708  | 327139  |
| 194 | 288.6339 | 227931  | 151526  | 258113  | 299620  | 283068  | 281582  | 253090  | 218938  | 162590  | 136704  | 201752  |
| 195 | 294.1555 | 233316  | 100965  | 85675   | 115699  | NA      | 227331  | 124349  | 1009094 | 430964  | 181651  | 268582  |
| 196 | 294.9395 | 4038710 | 4027896 | 3653095 | 3899350 | 4119612 | 3957507 | 3756774 | 3168118 | 3074486 | 3398943 | 3526430 |
| 197 | 302.3061 | 146142  | 139115  | 121083  | 132667  | 142011  | 169728  | 134121  | 109161  | 128856  | 130140  | 142454  |
| 198 | 309.1301 | 1481358 | 934829  | 1139072 | 794859  | 806821  | 1960658 | 1506977 | 5238657 | 2896331 | 1296897 | 1592617 |
| 199 | 310.9132 | 371953  | 322953  | 280921  | 369645  | 291524  | 442373  | 375872  | 278722  | 304153  | 251809  | 365647  |

|     |          |         |         |         |         |         |         |         |         |         |         |         |
|-----|----------|---------|---------|---------|---------|---------|---------|---------|---------|---------|---------|---------|
| 200 | 313.1555 | 2515894 | 1767995 | 4553393 | 2014873 | 3291137 | 870778  | 1406951 | 1911865 | 1811770 | 888818  | 1641000 |
| 203 | 325.1137 | 510751  | 134519  | 202794  | 329607  | 134954  | 687023  | 297299  | 1847872 | 1110857 | 433605  | 375265  |
| 205 | 331.1696 | 173639  | 164480  | 124332  | 124577  | 164508  | 210321  | 146186  | 151744  | 182018  | 181253  | 213503  |
| 207 | 337.0648 | 1627334 | 1989669 | 1906739 | 2428953 | 2137443 | 1330572 | 1360711 | 620151  | 1107504 | 2031008 | 2033956 |
| 208 | 343.1243 | 313006  | NA      | NA      | 124681  | NA      | 280144  | 117132  | 979591  | 504142  | 179477  | 135503  |
| 209 | 345.1854 | 105623  | NA      | NA      | 78799   | 97619   | 97630   | NA      | 71516   | 112032  | 77646   | 111856  |
| 210 | 345.1854 | 132626  | 124758  | 100436  | 120089  | 131372  | 120979  | 100506  | 109140  | 136114  | 120650  | 143704  |
| 211 | 347.2223 | 447906  | 591999  | 418324  | 462430  | 494761  | 495835  | 471708  | 364831  | 364071  | 438750  | 437239  |
| 212 | 350.118  | 1688518 | 1344718 | 1940142 | 3362381 | 1898906 | 418324  | 978732  | 296054  | 431431  | 621036  | 774721  |
| 213 | 350.1178 | 175151  | 142552  | 134129  | NA      | 140672  | 253106  | 220178  | 120487  | 210209  | 210914  | 199687  |
| 214 | 350.1178 | 2609476 | 2453540 | 2379981 | 2255335 | 2387301 | 3042786 | 2548884 | 2469166 | 2608147 | 2755032 | 3076631 |
| 215 | 352.8982 | 694735  | 749328  | 659901  | 629047  | 764349  | 752385  | 710174  | 515837  | 549391  | 608004  | 667925  |
| 217 | 361.0636 | 383204  | 379637  | 251124  | 432974  | 580144  | 247191  | 359032  | 417321  | 464919  | 662727  | 496202  |
| 218 | 362.927  | 2590139 | 2562189 | 2313440 | 2748633 | 2579492 | 2655208 | 2461297 | 2057130 | 2014058 | 2267677 | 2380984 |
| 219 | 368.1288 | 461233  | 525119  | 400228  | 347628  | 447019  | 744461  | 604537  | 339233  | 330290  | 431338  | 458928  |
| 220 | 368.1287 | 1364288 | 1669261 | 1454688 | 1129077 | 1450526 | 1578605 | 1566305 | 1619334 | 1296953 | 1342817 | 1598843 |
| 221 | 378.9009 | 249894  | 211407  | 205590  | 236659  | 197377  | 308014  | 246791  | 190364  | 207157  | 168935  | 245843  |

|     |          |         |         |         |         |         |         |         |         |         |         |         |
|-----|----------|---------|---------|---------|---------|---------|---------|---------|---------|---------|---------|---------|
| 222 | 380.2572 | 180550  | 160450  | 259565  | 307362  | 274981  | 122465  | 152775  | 244956  | 143095  | 146632  | 154418  |
| 223 | 382.1443 | 263354  | 235590  | 176776  | 245913  | 150669  | NA      | NA      | 440344  | 298241  | 152473  | 205568  |
| 224 | 383.1171 | 583161  | 355948  | 313805  | 441128  | 300531  | 777267  | 551130  | 1343748 | 1305801 | 687830  | 697717  |
| 225 | 409.1884 | 331521  | 252360  | 233040  | 220545  | 440366  | 333870  | 140927  | 242255  | 306283  | 425865  | 334977  |
| 226 | 418.1947 | 478065  | 296514  | 788691  | 1103284 | 634641  | NA      | NA      | 295285  | NA      | 179037  | NA      |
| 227 | 420.8858 | 433969  | 414390  | 424257  | 418966  | 419589  | 482275  | 409909  | 317555  | 319115  | NA      | NA      |
| 228 | 430.9148 | 1710577 | 1682013 | 1542856 | 1781431 | 1725370 | 1735073 | 1548877 | 1323700 | 1310630 | 1459761 | 1570316 |
| 229 | 441.076  | 125678  | 129337  | 111002  | 130946  | 134532  | 138060  | 166289  | 64935   | 129790  | 158130  | 187638  |
| 230 | 446.8886 | 160167  | 140577  | 126398  | 155660  | 115214  | 179302  | 158412  | 115798  | 124601  | 115164  | 153017  |
| 231 | 450.3228 | 410556  | 670853  | NA      | 418324  | 698666  | NA      | NA      | 638363  | 228573  | 515035  | 125734  |
| 232 | 453.2473 | 244065  | 292588  | 220273  | NA      | NA      | NA      | 210287  | 170014  | 364308  | 664432  | 268601  |
| 233 | 464.9085 | 177786  | 173349  | 162373  | 166396  | 152985  | 178626  | 157029  | 141984  | 131055  | 154347  | 162304  |
| 234 | 478.2947 | 329526  | 228262  | 280511  | 479823  | 346567  | NA      | 300228  | 523152  | 377737  | 173123  | 197716  |
| 237 | 498.9024 | 1437398 | 1366567 | 1287480 | 1504470 | 1390517 | 1472025 | 1261095 | 1110228 | 1086529 | 1216285 | 1273586 |
| 238 | 502.2947 | 282077  | 256132  | 298903  | 502197  | 376471  | NA      | 317491  | 528382  | 291973  | 237809  | 211182  |
| 239 | 505.0942 | 295889  | 372752  | 349413  | 523898  | 427840  | 190964  | 213406  | NA      | 167367  | 396205  | 401176  |
| 240 | 510.7611 | 669515  | 1063645 | 857094  | 352988  | 219695  | 372012  | 1081104 | 521987  | 1468158 | 1500849 | 704449  |

|     |          |         |         |         |         |         |         |         |         |         |         |          |
|-----|----------|---------|---------|---------|---------|---------|---------|---------|---------|---------|---------|----------|
| 241 | 511.2624 | 383039  | 589093  | 457747  | 181355  | 109235  | 183793  | 606021  | 276037  | 819195  | 821907  | 396427   |
| 243 | 520.3421 | 261779  | 136671  | 279210  | 385137  | 308157  | 269657  | 255336  | 397721  | 266129  | NA      | 260229   |
| 244 | 520.3417 | 4421212 | 2463710 | 4851193 | 7185192 | 5916897 | 4698175 | 5558660 | 7749050 | 5094901 | 2210704 | 4542890  |
| 250 | 532.8963 | 379245  | 393989  | 345046  | 357426  | 362066  | 372781  | 356034  | 307612  | 294536  | 340613  | 340906   |
| 251 | 539.2721 | 207666  | 186638  | 115236  | NA      | NA      | 152368  | 164424  | 165911  | 334217  | 323290  | 224011   |
| 252 | 544.3416 | 1321377 | 1185921 | 1764051 | 2747089 | 2061603 | 1135063 | 1812362 | 2245357 | 1501293 | 971527  | 1879059  |
| 255 | 566.8901 | 1359218 | 1368165 | 1282471 | 1380366 | 1315309 | 1330102 | 1150881 | 1023906 | 1045206 | 1247707 | 1292648  |
| 256 | 568.3416 | 242516  | 158667  | 391734  | 342426  | 263857  | NA      | 304865  | 430731  | 309090  | 129795  | 215790   |
| 257 | 600.884  | 412061  | 418324  | 399326  | 423144  | 411161  | 393851  | 330527  | 319948  | 314435  | 372949  | 369004   |
| 258 | 603.7935 | 1229843 | 1574158 | 1273650 | 380597  | 402113  | 926545  | 1782274 | 1240637 | 3328856 | 1953345 | 1524404  |
| 259 | 604.2947 | 767044  | 954483  | 783819  | 236670  | 240288  | 572866  | 1074622 | 762392  | 1965008 | 1202471 | 921738   |
| 260 | 616.1788 | 1960657 | 443930  | 263327  | 398993  | 623029  | 366768  | 263495  | 1437460 | 4352730 | 5130580 | 14351129 |
| 261 | 619.7539 | 796373  | 279604  | 801981  | 554900  | 1012984 | 518321  | 274735  | 1245745 | 951235  | NA      | 368781   |
| 262 | 620.2552 | 517644  | 168768  | 503282  | 343843  | 643866  | 319618  | 158166  | 799218  | 615646  | NA      | 235756   |
| 263 | 632.3043 | 233586  | 132503  | NA      | NA      | NA      | 181572  | 161242  | 171193  | 509353  | 269026  | 250406   |
| 264 | 634.8778 | 1226082 | 1186099 | 1193907 | 1221766 | 1289732 | 1230272 | 1070445 | 940458  | 913845  | 1054045 | 1134449  |
| 265 | 655.2834 | 406071  | 875280  | 509145  | 463894  | 306275  | 190717  | 416647  | 284628  | 401377  | 265627  | 470381   |

|     |          |         |         |         |         |         |         |         |         |         |         |         |
|-----|----------|---------|---------|---------|---------|---------|---------|---------|---------|---------|---------|---------|
| 266 | 655.7847 | 274623  | 566475  | 328158  | 287788  | 179740  | 119314  | 256121  | 180156  | 246601  | 161601  | 306245  |
| 267 | 668.8715 | 332111  | 334729  | 296948  | 322589  | 359418  | 327710  | 291179  | 265656  | 260107  | 290911  | 297371  |
| 268 | 675.8204 | 490722  | 386691  | 229018  | 98113   | NA      | 486994  | 478813  | 395062  | 1187419 | 703964  | 716784  |
| 269 | 676.3216 | 384825  | 258007  | 148739  | NA      | NA      | 334250  | 332788  | 274757  | 806699  | 480410  | 493775  |
| 270 | 698.7887 | 1323824 | 3296567 | 1365472 | 2033272 | 349336  | 593932  | 2949083 | 859657  | 2438936 | 3267818 | 3031734 |
| 271 | 699.2891 | 950503  | 2305110 | 992515  | 1416725 | 246482  | 430875  | 2095489 | 617937  | 1778317 | 2298870 | 2193503 |
| 272 | 702.8653 | 1094674 | 1121738 | 1008669 | 1104716 | 1097420 | 1134975 | 996902  | 826316  | 824767  | 975622  | 1015029 |
| 274 | 725.7467 | 158606  | 223207  | 133333  | 167817  | NA      | NA      | 235401  | NA      | 161355  | 210830  | 206697  |
| 275 | 733.3338 | 1962804 | 3159188 | 1537880 | 574441  | 683265  | 1405889 | 4163946 | 1813727 | 5500296 | 2287403 | 2988581 |
| 276 | 733.8349 | 1462779 | 2354857 | 1182821 | 425880  | 504080  | 1038703 | 3172796 | 1370776 | 4102462 | 1748773 | 2226031 |
| 277 | 736.859  | 259685  | 257976  | 233656  | 264611  | 259305  | 254484  | 214427  | 201171  | 190557  | 221579  | 217209  |
| 278 | 737.6218 | 135234  | 73731   | 252332  | 126777  | 217043  | NA      | 114076  | 60699   | NA      | 76682   | NA      |
| 279 | 737.7329 | 132724  | NA      | 266885  | 119246  | 219356  | NA      | 102554  | NA      | NA      | 67524   | NA      |
| 280 | 749.3855 | 190173  | 149824  | 249337  | 145338  | NA      | NA      | NA      | 208086  | NA      | 152887  | NA      |
| 282 | 768.8528 | 204591  | 271425  | 113093  | 106590  | NA      | NA      | 173387  | 216223  | 335436  | 178761  | 148299  |
| 283 | 770.8529 | 852645  | 857260  | 790518  | 842005  | 840628  | 884095  | 786994  | 676096  | 642081  | 758646  | 795672  |
| 284 | 773.3172 | 330781  | 273315  | 320950  | 288792  | 505379  | 170072  | 561494  | 318656  | 356271  | 328366  | 553861  |

|     |          |        |        |        |        |        |        |         |        |         |        |         |
|-----|----------|--------|--------|--------|--------|--------|--------|---------|--------|---------|--------|---------|
| 285 | 773.8185 | 253450 | 196669 | 239786 | 201909 | 387201 | 119850 | 418324  | 243205 | 269242  | 248304 | 418324  |
| 286 | 804.8466 | 201514 | 186306 | 191459 | 196168 | 200930 | 189296 | 174291  | 150231 | 141010  | 176046 | 170939  |
| 287 | 808.8358 | 700286 | 823484 | 564656 | 223211 | 414922 | 618482 | 1547417 | 696296 | 1438333 | 899584 | 1993505 |
| 288 | 809.337  | 542856 | 646909 | 426748 | 169598 | 310985 | 493806 | 1201997 | 550518 | 1119667 | 693912 | 1567668 |
| 289 | 829.6987 | 134639 | 102354 | 247514 | 129499 | 194645 | NA     | 105982  | 61234  | 164081  | 84375  | NA      |
| 290 | 829.8234 | 125083 | 75485  | 243012 | 121452 | 173479 | 68216  | 102705  | NA     | NA      | 81318  | NA      |
| 291 | 838.8404 | 729414 | 746394 | 678236 | 714984 | 713408 | 764615 | 666777  | 551783 | 554474  | 612906 | 680446  |
| 292 | 864.4126 | 351064 | 407548 | 686224 | 488477 | 275465 | NA     | 210855  | 439931 | 160603  | 249891 | 191618  |
| 293 | 872.8343 | 179349 | 172306 | 165659 | 186149 | 172092 | 166188 | 164999  | 135795 | 125836  | NA     | NA      |
| 294 | 906.828  | 452818 | 446808 | 412480 | 433205 | 438576 | 490100 | 428351  | 343634 | 331522  | 396228 | 406076  |
| 295 | 974.8157 | 315411 | 342103 | 283791 | 333946 | 311760 | 327192 | 286576  | 230765 | 236832  | 255769 | 276567  |



| D120264  | D120265  | D120266  | D120267  | D120268  | D120344  | D120345  | D120346  | D120347  | D120348  | D120349  | D120359  | D120377  |
|----------|----------|----------|----------|----------|----------|----------|----------|----------|----------|----------|----------|----------|
| 933116   | NA       | 330696   | NA       | 320211   | 830774   | 228173   | 777616   | 1890031  | 302542   | 226201   | 412250   | 1900936  |
| 1419529  | 1775358  | 1498355  | 1399032  | 1001770  | 1204218  | 948026   | 1262607  | 817413   | 1844717  | 1187036  | 739662   | 254860   |
| 2632550  | 2598171  | 1455680  | 2503634  | 1694889  | 2223773  | 1958889  | 1675302  | 2387841  | 1526482  | 2112234  | 1453096  | 1357645  |
| 465009   | 581918   | 463483   | 639936   | 384361   | 365116   | 702844   | 398934   | 601298   | 478128   | 457049   | 340779   | 477566   |
| 760057   | 883102   | 702009   | 799625   | 814607   | 1133861  | 802179   | 806309   | 905165   | 966776   | 940141   | 1133364  | 659195   |
| 188420   | 173199   | 148345   | 205634   | 147527   | 148119   | 153220   | 166003   | 194052   | 162759   | 173999   | 184470   | 160331   |
| 5256407  | 7730628  | 3382388  | 5305528  | 5252349  | 4151773  | 8187802  | 4359632  | 4829175  | 3044307  | 4977755  | 3337678  | 3167605  |
| 24888543 | 58596340 | 31556240 | 21289583 | 37603211 | 29637744 | 20280097 | 35599160 | 35208625 | 21134547 | 30259989 | 27647822 | 30792330 |
| NA       |
| 2700908  | 5428265  | 2964071  | 3107045  | 2661577  | 5743453  | 1981977  | 2292173  | 1968485  | 7110906  | 5217117  | 4336734  | 6496129  |
| 29510875 | 29464889 | 33412419 | 34968715 | 31769011 | 28324830 | 24486890 | 30407633 | 33477149 | 29428840 | 23396077 | 26531246 | 18112077 |
| 491272   | 800523   | 726736   | 590131   | 822408   | 532851   | 456065   | 550410   | 976832   | 429929   | 536130   | 518639   | 618834   |
| 1929766  | 1808582  | 2736539  | 2283456  | 2097373  | 2015731  | 1707818  | 1832671  | 2237973  | 1683911  | 1820083  | 1972581  | 1735611  |
| 4159937  | 9125433  | 3831933  | 7771969  | 6655948  | 5647344  | 11353903 | 4612100  | 3920872  | 2838816  | 4987695  | 4389759  | 3217816  |
| 115714   | 147824   | 237661   | 129712   | 280235   | 314306   | 158313   | 168429   | 152807   | 414264   | 311111   | 399558   | 267164   |

|          |          |          |          |          |          |          |          |          |          |          |          |          |
|----------|----------|----------|----------|----------|----------|----------|----------|----------|----------|----------|----------|----------|
| 1754034  | 1880968  | 489354   | 509691   | 891284   | 697776   | 1616306  | 228192   | 528100   | 484235   | 290536   | 256676   | 170686   |
| 215317   | 293462   | 261012   | 232270   | 267216   | 348400   | 174367   | 289280   | 305238   | 342682   | 255266   | 309606   | 249924   |
| 2018302  | 2512550  | 1964676  | 2123824  | 1481465  | 1572345  | 1252459  | 1980752  | 2336293  | 1436283  | 1083368  | 843133   | 736635   |
| 882249   | 762168   | 1110263  | 812014   | 1209074  | 686644   | 615627   | 458899   | 2446886  | 1204708  | 1115358  | 861563   | 414491   |
| 117904   | 92342    | 80423    | 77414    | 112757   | 88951    | 95035    | 102441   | 119706   | 87519    | 125650   | 113064   | NA       |
| 782717   | 776570   | 702900   | 772617   | 645440   | 959463   | 598911   | 774405   | 837284   | 818202   | 743821   | 846276   | 625184   |
| 167025   | 140294   | 80919    | 114263   | NA       | 91396    | 139207   | 105379   | 139452   | 91814    | 106999   | NA       | NA       |
| 3802297  | 1531020  | 2094352  | 3666305  | 1775732  | 1419391  | 1907663  | 4568182  | 6078200  | 4286568  | 4012408  | 6690791  | 3058439  |
| 18244259 | 15507289 | 22529361 | 16070182 | 21192469 | 17309852 | 13313663 | 15101529 | 15796145 | 17648643 | 11959008 | 16515309 | 11796841 |
| 26293384 | 25264881 | 31018852 | 27511895 | 26297582 | 25176427 | 21461463 | 22931316 | 26510704 | 27085974 | 17666662 | 24985763 | 17135774 |
| 361260   | 469752   | 359463   | 524962   | 348744   | 315440   | 555047   | 336441   | 476074   | 376549   | 372459   | 280098   | 391292   |
| 155694   | 208697   | 253404   | 191306   | 219930   | 196927   | NA       | 125163   | 254749   | 135135   | NA       | 131822   | 128993   |
| 415567   | 598583   | 663417   | 648635   | 442239   | 366964   | 318379   | 393857   | 770210   | 500847   | 246011   | 271303   | 220857   |
| 156360   | 233718   | 207153   | 264311   | 163137   | 170806   | 167923   | 231695   | 217273   | 148195   | 192296   | 174996   | 161904   |
| 241207   | 344228   | 333266   | 354422   | 118804   | 419661   | 205793   | 273257   | 361411   | 386827   | 219567   | 205852   | 327525   |
| 147530   | 122368   | 278195   | 170109   | 184016   | 151667   | 85615    | 160987   | 250940   | 103189   | 165833   | 165634   | 142060   |
| 159146   | 156454   | 97759    | 176312   | 115531   | 145716   | 152084   | 117614   | 151911   | 208169   | 177386   | 220558   | 132712   |

|         |          |         |         |         |         |         |         |         |         |          |         |         |
|---------|----------|---------|---------|---------|---------|---------|---------|---------|---------|----------|---------|---------|
| 148174  | 139448   | 137646  | 193277  | NA      | 176907  | NA      | 164931  | 181371  | 119830  | 210078   | NA      | 138714  |
| 92294   | 100480   | 88121   | 86162   | 88948   | 93399   | 73886   | NA      | 81808   | NA      | 94585    | NA      | 79837   |
| 81103   | 74563    | 67561   | 98946   | 90879   | 81358   | NA      | 81508   | 88082   | 60331   | 69104    | NA      | 101537  |
| 1937867 | 1350246  | 939691  | 1648883 | 2093465 | 1939027 | 1400521 | 1295078 | 1362620 | 1186521 | 1376320  | 1276262 | 1162822 |
| 1208523 | 1546835  | 864887  | 1394284 | 1324995 | 1159613 | 1405637 | 1178656 | 1327787 | 1075268 | 1275310  | 927948  | 1190680 |
| 767025  | 997813   | 569012  | 857743  | 816984  | 698436  | 898321  | 782986  | 898174  | 685465  | 807416   | 567025  | 774113  |
| 1648750 | 16352235 | 120493  | 908820  | NA      | 1799968 | 1926930 | 172528  | NA      | 4325390 | 10728688 | 1296178 | 1500242 |
| 160257  | 179251   | 148609  | 176188  | 156054  | 177036  | 153635  | 175651  | 184702  | 172610  | 176980   | 181785  | 157576  |
| 1013015 | 1289085  | 1833777 | 1083093 | 2478643 | 2693356 | 1432330 | 1357153 | 1136145 | 3149435 | 2594867  | 2963022 | 2245648 |
| 371451  | 236784   | 151114  | 289947  | 209971  | 198304  | 333188  | 138235  | 133714  | 219580  | 144367   | 136545  | 106752  |
| 2975727 | 3417132  | 3267713 | 3075809 | 3367366 | 3964629 | 2273093 | 3308919 | 3490335 | 4001948 | 3173906  | 3498976 | 3311035 |
| 1157903 | 1144467  | 1160186 | 1069883 | 901440  | 929929  | 742672  | 957116  | 1195286 | 895845  | 795403   | 664401  | 281190  |
| 709314  | 578524   | 556659  | 611693  | 422929  | 447305  | 464014  | 728503  | 799731  | 420796  | 462125   | 855838  | 200586  |
| 525687  | 746081   | 456220  | 500675  | 296744  | 439717  | 403693  | 439148  | 678006  | 485385  | 343401   | 388211  | 340407  |
| 2484975 | 2339713  | 2046103 | 2440237 | 1861334 | 2280505 | 1776866 | 2519704 | 2458329 | 2261632 | 2361007  | 1674775 | 2045800 |
| 5034117 | 5918458  | 6738588 | 6055162 | 6408291 | 5589922 | 3159902 | 3934043 | 7255173 | 3864146 | 3728121  | 4071801 | 4057769 |
| 778075  | 746404   | 644633  | 790496  | 599937  | 695334  | 553357  | 770712  | 798225  | 699288  | 746625   | 516748  | 649474  |

|          |          |          |          |          |          |          |          |          |          |          |          |          |
|----------|----------|----------|----------|----------|----------|----------|----------|----------|----------|----------|----------|----------|
| 278938   | 339652   | 266658   | 390487   | 246566   | 215535   | 419445   | 258528   | 357537   | 268906   | 282106   | 200477   | 300202   |
| 232071   | 270892   | 305462   | 249355   | 275946   | 236944   | 138513   | 166607   | 327112   | 169068   | 169308   | 173001   | 184931   |
| 237168   | 187097   | 122681   | 306920   | 268131   | 213118   | 157101   | 231915   | 270844   | 181299   | 240322   | 207832   | 178093   |
| 203678   | 226589   | 170217   | 229613   | 183348   | 222508   | 180657   | 223009   | 191449   | 211666   | 237306   | 218829   | 212391   |
| 9057240  | 10012676 | 8187821  | 9294456  | 8298152  | 10588263 | 8277715  | 9925755  | 10511528 | 9789724  | 9741716  | 10325536 | 8248425  |
| 103676   | 123266   | 106780   | 102673   | 126196   | 133756   | 112150   | 132031   | 117850   | 135253   | 121273   | NA       | NA       |
| 363824   | 365300   | 393983   | 339128   | 447942   | 261956   | 451485   | 1037321  | 535166   | 404376   | 760204   | 599522   | 349457   |
| 3640270  | 4063702  | 2298435  | 4565433  | 3522894  | 2834365  | 3954688  | 3271826  | 3702873  | 2681382  | 5503577  | 4101007  | 1722059  |
| 638027   | 793259   | 1409380  | 697203   | 2365239  | 2278317  | 1143809  | 1026419  | 712132   | 2587369  | 2177174  | 2468640  | 1855073  |
| 74544    | 111129   | 61963    | 113887   | 65738    | 66191    | 88982    | NA       | 100780   | 119973   | 103086   | 159389   | 79776    |
| 249712   | 210575   | 496695   | 297470   | 322216   | 271249   | 142628   | 305679   | 443102   | 195729   | 295290   | 293681   | 236538   |
| 27392870 | 26585946 | 35277287 | 29580086 | 27300992 | 24364743 | 22005784 | 24588615 | 29657129 | 22416759 | 23578306 | 24288136 | 23667840 |
| 6553731  | 5460434  | 4164708  | 5546440  | 3822801  | 4386984  | 5283457  | 4755907  | 6115522  | 4861157  | 4348480  | 4085173  | 2861898  |
| 607144   | 740719   | 542566   | 632435   | 615073   | 853278   | 637662   | 630346   | 706774   | 834795   | 732626   | 902835   | 560716   |
| 435235   | 278615   | 579880   | 354038   | 364943   | 587946   | 597345   | 455668   | 311012   | 392745   | 549399   | 430207   | 358584   |
| 70861    | 65600    | 104169   | NA       | 67002    | 208599   | 104107   | 122556   | 119128   | 265781   | 364527   | 325951   | 212412   |
| 518083   | 222622   | 912807   | 865798   | 694555   | 157372   | 836972   | 755810   | 339363   | 564213   | 735857   | 282533   | 677335   |

|         |         |          |          |          |         |         |          |          |         |          |         |         |
|---------|---------|----------|----------|----------|---------|---------|----------|----------|---------|----------|---------|---------|
| 369661  | NA      | 240246   | 264763   | 223039   | NA      | 368007  | 330610   | 259232   | 287097  | 419506   | 399045  | 436140  |
| 86570   | NA      | 64458    | 89444    | 76811    | 109861  | NA      | 92939    | 106771   | 93249   | 96838    | 91910   | NA      |
| 331895  | 740412  | 1225864  | 522580   | 541443   | 285616  | 301818  | 293980   | 396772   | 262277  | NA       | 175834  | NA      |
| 963445  | 1182381 | 2565141  | 959143   | 487331   | 246949  | 312495  | 2476235  | 2025996  | 122571  | 299177   | 721705  | NA      |
| 9580416 | 7779298 | 16006247 | 10365494 | 10970678 | 9319536 | 5815161 | 10507992 | 13914822 | 7893699 | 10189981 | 9417932 | 8446322 |
| 221888  | 341596  | 243026   | 262211   | 213406   | 192217  | 175355  | 298122   | 242375   | 372964  | 187732   | 156533  | NA      |
| 536887  | 284120  | 63402    | 633967   | NA       | NA      | NA      | NA       | 387333   | NA      | 193509   | 150760  | NA      |
| 1472456 | 1319661 | 2252737  | 2268014  | 1853006  | 1134316 | 1224832 | 1756024  | 1506211  | 1522326 | 1820064  | 1476797 | 1502968 |
| 221669  | 223536  | 167209   | 231690   | 233779   | 239878  | 202845  | 275997   | 287323   | 232536  | 304984   | 327012  | 244599  |
| 174082  | 306699  | 137747   | 365837   | 190183   | 493078  | 228803  | 597375   | 400189   | 173629  | 888764   | 366526  | 330177  |
| 851524  | 3206265 | 8329752  | 621181   | 354442   | 314748  | 572368  | 4143794  | 4542487  | NA      | 1349182  | 681033  | NA      |
| 114151  | 163223  | 159475   | 152505   | 101373   | 370109  | 183858  | 164574   | 140838   | 163044  | 181632   | 133175  | 200918  |
| 576839  | 745609  | 403801   | 654698   | 600952   | NA      | 650835  | 540456   | 585754   | 499071  | 611310   | NA      | 572572  |
| 565704  | 724195  | 378372   | 624035   | 566716   | NA      | 625548  | 527117   | 584570   | 485489  | 574428   | NA      | 535947  |
| 3683936 | 5420999 | 4330361  | 4882473  | 6760588  | 6095583 | 6055460 | 4900886  | 4619142  | 5628677 | 8240182  | 6259129 | 6915896 |
| 177613  | NA      | 385373   | 253711   | NA       | NA      | 236719  | 173611   | 191303   | 179430  | 219888   | 187825  | 351211  |
| 5395161 | 4516339 | 2137090  | 3035260  | 2477722  | 4183197 | 4403455 | 4086060  | 5178394  | 4588711 | 4271521  | 3166358 | 1333897 |

|          |          |          |          |          |          |          |          |          |          |          |          |          |
|----------|----------|----------|----------|----------|----------|----------|----------|----------|----------|----------|----------|----------|
| 16111514 | 14316463 | 23593424 | 23483546 | 20154831 | 12774342 | 11634626 | 18448748 | 15479669 | 15948007 | 18799812 | 15681875 | 16483994 |
| 798347   | 760624   | 651778   | 785672   | 651015   | 696307   | 656026   | 732448   | 850055   | 628202   | 754505   | 506281   | 697432   |
| 274641   | 239956   | 258296   | 241449   | 173950   | 346712   | 167606   | 260618   | 297018   | 267810   | 263990   | 256641   | 185207   |
| 493756   | 493035   | 410761   | 509065   | 406718   | 434502   | 378892   | 433970   | 546876   | 390189   | 482466   | NA       | 445654   |
| 735245   | 768128   | 507499   | 592763   | 627304   | 300237   | 417206   | 446061   | 759622   | 389939   | 761790   | 479581   | 220241   |
| 342442   | 357891   | 203809   | 296553   | 198563   | 258072   | 241316   | 291276   | 360489   | 247908   | 324681   | 201943   | 252811   |
| 71822    | 105821   | 86950    | NA       | 101083   | 88803    | 99828    | 122026   | NA       | 157097   | 81672    | 128270   | 79266    |
| 112600   | 106397   | 67771    | 112396   | 105820   | 107334   | 111173   | 123512   | 113437   | 105284   | 129524   | 130495   | NA       |
| 2352381  | 2387050  | 2015949  | 2262405  | 1948244  | 2124943  | 1831640  | 2394859  | 2379818  | 2371920  | 2244628  | 1694943  | 1933741  |
| 354257   | 387242   | 283684   | 323939   | 418324   | 270458   | 339684   | 342748   | 430625   | NA       | 254080   | 305364   | NA       |
| 671906   | 735317   | 607782   | 733885   | 617834   | 686516   | 567576   | 747855   | 721477   | 723696   | 708543   | 482948   | 615924   |
| 62561    | 108365   | 84559    | 89149    | 170845   | 150438   | 137667   | 88328    | 88219    | 139794   | 172494   | 136668   | 168536   |
| 112917   | 118936   | 99491    | 126270   | 106514   | 133763   | 97048    | 120576   | 115033   | 127119   | 133334   | 132113   | 108064   |
| 6482859  | 7392489  | 5927593  | 7312709  | 5874035  | 8189849  | 5823473  | 7402872  | 7503568  | 7097781  | 7423198  | 7838185  | 6406518  |
| 681983   | 646045   | 455950   | 606138   | 552840   | 511775   | 764074   | 627391   | 743496   | 408133   | 535680   | 288867   | 400226   |
| 130071   | 189173   | 129959   | 171254   | 119434   | 117784   | 112283   | 145486   | 150117   | NA       | 102301   | NA       | NA       |
| 431433   | 3027005  | 1037162  | 290427   | 1435273  | 641766   | 317346   | 1184711  | 1125815  | 264645   | 802709   | 551284   | 1101179  |

|        |         |        |        |         |         |         |        |        |        |         |         |         |
|--------|---------|--------|--------|---------|---------|---------|--------|--------|--------|---------|---------|---------|
| 117730 | 154915  | 183278 | 255214 | 235273  | 115897  | 123246  | 180183 | 173953 | 123672 | 105928  | 121993  | NA      |
| 121008 | 102885  | 111989 | 99552  | 74875   | 147772  | 70479   | 118181 | 129218 | 114932 | 113722  | 113665  | 77541   |
| 579006 | 770347  | 596173 | 730679 | 644305  | 653490  | 669615  | 751419 | 784766 | 732776 | 786913  | 764326  | 685569  |
| 97242  | 95458   | 91760  | 115005 | 84396   | 104002  | 85508   | 115400 | 110948 | 97768  | 115528  | 108545  | 106740  |
| 309074 | 688349  | 568997 | 463914 | 1341317 | 1301143 | 1131124 | 445116 | 327101 | 961000 | 991090  | 1120475 | 716281  |
| 496756 | 561173  | 469687 | 517340 | 512184  | 747825  | 528986  | 520296 | 577888 | 637437 | 597126  | 684474  | 448005  |
| 220783 | 244367  | 92345  | 152787 | 112584  | 120092  | 185944  | 141829 | 301250 | NA     | 161588  | NA      | NA      |
| 312041 | 190829  | NA     | 340678 | 124514  | 197677  | 202474  | 197671 | 186640 | 168866 | 160749  | 152812  | 144180  |
| NA     | NA      | NA     | NA     | NA      | NA      | 126745  | 125681 | 111611 | NA     | 178403  | 187473  | NA      |
| 207838 | 227183  | 126299 | 211114 | NA      | NA      | NA      | 177497 | 231203 | NA     | NA      | NA      | NA      |
| 277795 | 1361699 | 718145 | 708628 | 1614096 | 1572910 | 1030132 | 884765 | 525282 | 415867 | 3767936 | 1453273 | 2414521 |
| 525115 | 607566  | 539664 | 489569 | 257555  | 312088  | 187518  | 447428 | 646714 | 292446 | 138870  | NA      | NA      |
| 386197 | 430310  | 288732 | 432680 | 296841  | 332536  | 327321  | 390789 | 437983 | 314256 | 354634  | 249786  | 294196  |
| 103400 | 115279  | 83355  | 119087 | NA      | 77698   | 87959   | 103398 | 111672 | NA     | NA      | NA      | 79845   |
| 536393 | 1019003 | 768575 | 507966 | 191098  | 896285  | 1144435 | 501908 | 170417 | 663097 | 122934  | 248036  | NA      |
| 169544 | 301169  | 114524 | 171401 | 133981  | NA      | 243159  | 344727 | 362608 | 123349 | NA      | NA      | NA      |
| NA     | 158622  | 80689  | 164945 | 122266  | 119797  | 182979  | 124261 | 118829 | 79108  | 128477  | 134894  | 105306  |

|         |         |         |         |         |         |         |         |         |         |         |         |         |
|---------|---------|---------|---------|---------|---------|---------|---------|---------|---------|---------|---------|---------|
| 806224  | 796859  | 656048  | 811590  | 646451  | 823611  | 669897  | 817114  | 789926  | 777783  | 798262  | 784513  | 703756  |
| 671518  | 623705  | 549913  | 625071  | NA      | 545326  | 490529  | 605532  | 587207  | 598306  | 596952  | 332750  | 515973  |
| 284597  | 388564  | 286067  | 387678  | 204728  | 287567  | 133252  | 343150  | 344435  | 188556  | 191737  | 205969  | 207379  |
| 90477   | NA      | 167377  | 167731  | NA      | 204987  | NA      | NA      | 344532  | 91364   | 165717  | NA      | NA      |
| 198912  | 206099  | 217863  | 189711  | 116122  | 314616  | 138629  | 245971  | 240137  | 204759  | 232755  | 200291  | 150270  |
| 176902  | 393651  | 646018  | 381714  | 1457506 | 724781  | 408981  | 506975  | 396602  | 872627  | 1130258 | 1080317 | 674732  |
| 154227  | NA      | 157554  | 301849  | NA      | 130427  | 164895  | 175093  | 325736  | 124005  | 208816  | 156482  | 166073  |
| 102380  | 174253  | 293081  | 150242  | 646334  | 282227  | 221669  | 126898  | 167113  | 164413  | 219263  | 133461  | 230251  |
| 1108409 | 1153741 | 1049013 | 1030779 | 986670  | 1148064 | 881953  | 1113265 | 1237227 | 1140381 | 1091834 | 930142  | 863613  |
| 328136  | 316413  | 283447  | NA      | 274352  | 339232  | 261518  | NA      | 344781  | 333306  | NA      | NA      | NA      |
| 481942  | 653133  | 642522  | 249853  | 458407  | 1108480 | 436568  | 152331  | 652478  | 520246  | 349594  | 339223  | 147308  |
| 199272  | 172714  | 246028  | 181512  | 167339  | 255948  | 172611  | 202506  | 184052  | 294320  | 134877  | NA      | 164426  |
| 87425   | 160240  | 329176  | 150607  | 600330  | 331663  | 221566  | 204969  | 116272  | 440339  | 300095  | 498221  | 361181  |
| 3521134 | 3951468 | 3204527 | 3931971 | 3362929 | 4231332 | 3364445 | 4121670 | 4207676 | 4060890 | 4042957 | 4243928 | 3480813 |
| 129349  | 131516  | 117454  | 126382  | 126718  | 154659  | 115855  | 148547  | 148256  | 151752  | 131570  | 137260  | 135097  |
| 671080  | 1383588 | 1208516 | 1245148 | 3133075 | 2100723 | 1697499 | 1297753 | 849496  | 1764597 | 2591726 | 1741864 | 2437649 |
| 284410  | 338364  | 281824  | 292411  | 324708  | 417883  | 316358  | 287683  | 330244  | 407927  | 349003  | 429431  | 278846  |



|         |         |         |         |         |         |         |         |         |         |         |         |         |
|---------|---------|---------|---------|---------|---------|---------|---------|---------|---------|---------|---------|---------|
| 2860740 | 342901  | 1850734 | 2284113 | 1479779 | 1287638 | 1583492 | 2480798 | 2959363 | 1261317 | 3350401 | 1708008 | 1333508 |
| 162958  | 279439  | 643874  | 220997  | 963437  | 1038948 | 532486  | 379995  | 302073  | 1337447 | 1077851 | 1437398 | 979278  |
| 146196  | 180291  | 164175  | 212758  | 148755  | 170320  | 173964  | 192237  | 240773  | 187578  | 170931  | 181113  | 117499  |
| 2601623 | 1727429 | 1255982 | 1718783 | 1076254 | 1141527 | 1952325 | 1436128 | 2249830 | 1467670 | 1221738 | 1032386 | 657514  |
| NA      | 114087  | 274355  | NA      | 477126  | 471842  | 235323  | 137705  | 116878  | 627826  | 506902  | 652190  | 418324  |
| 93971   | 87529   | 124507  | 95067   | 109539  | 104767  | 71019   | 93147   | 100872  | 109966  | NA      | 107086  | 74448   |
| 122415  | 114067  | 141845  | 138319  | 118973  | 147616  | 115870  | 139007  | 153554  | 151573  | 105369  | 147730  | 110679  |
| 451223  | 416309  | 418872  | 418324  | 458828  | 418324  | 435322  | 412401  | 557214  | 486152  | 406947  | 362029  | 436215  |
| 2400900 | 792832  | 1020951 | 578806  | 551200  | 1256969 | 850086  | 418324  | 1294997 | 1345495 | 1858622 | 3712324 | 2184461 |
| 137120  | 137082  | 187091  | 147484  | 183085  | 235323  | 121048  | 283580  | 171120  | 145527  | NA      | NA      | NA      |
| 2377163 | 2818165 | 2319365 | 2441879 | 2784010 | 3094711 | 2346930 | 2921071 | 2772263 | 3094153 | 2792102 | 2193504 | 1791723 |
| 716944  | 644913  | 678540  | 619945  | 560256  | 809992  | 513767  | 715360  | 753435  | 695410  | 642267  | 659215  | 562496  |
| 309131  | 731364  | 249808  | 586381  | 286061  | 380728  | 326718  | 573398  | 509730  | 301879  | 658514  | 353681  | 359361  |
| 2313066 | 2609726 | 2142174 | 2440905 | 2123184 | 2812934 | 2044665 | 2588455 | 2576832 | 2673385 | 2557501 | 2753179 | 2182089 |
| 403609  | 418430  | 534675  | 426474  | 449078  | 469828  | 317829  | 700913  | 687105  | 556845  | 325117  | 304493  | 132309  |
| 1273394 | 1308217 | 1075626 | 1236388 | 1491113 | 1261345 | 1298291 | 1308780 | 1311159 | 1303292 | 1573469 | 1113767 | 1127036 |
| 186089  | 227402  | 174188  | 214249  | 212085  | 306648  | 190598  | 194043  | 209067  | 247228  | 232173  | 297799  | 182657  |

|         |         |         |         |         |         |         |         |         |         |         |         |         |
|---------|---------|---------|---------|---------|---------|---------|---------|---------|---------|---------|---------|---------|
| 192198  | NA      | 110283  | 186012  | 177835  | 142113  | 203804  | 119308  | 168634  | 263062  | 125299  | NA      | 114818  |
| 198328  | 165748  | NA      | 153570  | 236472  | 149220  | 318250  | NA      | NA      | 171503  | 436777  | 352047  | 644174  |
| 295850  | 556882  | 609552  | 409468  | 1058907 | 983295  | 842183  | 551806  | 455196  | 908793  | 1284454 | 987142  | 1150500 |
| 277718  | 211982  | 663441  | 540480  | 431511  | 171889  | 159913  | 333205  | 268342  | 280991  | 358851  | 252313  | 302426  |
| NA      | NA      | 152405  | 295749  | 111097  | 347924  | 639123  | NA      | 604213  | 337861  | 226805  | NA      | NA      |
| 418324  | 395772  | 396109  | 381434  | 334473  | 481772  | NA      | 438543  | 429339  | 428468  | 415296  | 424488  | 341543  |
| 1507754 | 1733564 | 1491868 | 1607659 | 1360521 | 1899099 | 1391587 | 1739214 | 1764543 | 1730519 | 1655943 | 1803461 | 1418936 |
| 122471  | 182302  | 108211  | 151436  | 103497  | 135745  | 170929  | 148992  | 136871  | 99130   | 123835  | 96442   | 124474  |
| NA      | 153110  | 118896  | 128005  | 130681  | 181160  | 126592  | 129920  | 131097  | 176246  | 148674  | 184646  | 118145  |
| NA      | 215053  | 673613  | NA      | 196427  | 149545  | 121337  | 379965  | 497467  | NA      | 141123  | NA      | 217509  |
| 417687  | 418071  | 579277  | 126883  | 199229  | 341734  | 189492  | NA      | 262854  | 239448  | 151164  | 221180  | 156243  |
| 154131  | 162187  | 144473  | 180153  | 163621  | 183737  | 140815  | 156843  | 200950  | 142853  | 174947  | 154546  | 146591  |
| 225895  | 184164  | 385879  | 286317  | 300666  | 289221  | 308912  | 225296  | 294068  | 279459  | 198983  | NA      | 997637  |
| 1321286 | 1451784 | 1243138 | 1328673 | 1185369 | 1543665 | 1170537 | 1469106 | 1423548 | 1449743 | 1386150 | 1518224 | 1204297 |
| 324438  | 197419  | 284722  | 350948  | 199289  | 313324  | 416446  | 369011  | 436552  | 280414  | 219992  | NA      | 343216  |
| 597156  | 278819  | 189658  | 305670  | 157949  | NA      | 384485  | 217942  | 418324  | 226946  | 174667  | 127068  | NA      |
| 1505350 | 822865  | 1218655 | 352110  | 709740  | 1532853 | 719112  | 419299  | 706349  | 1065148 | 576569  | 716141  | 574546  |

|         |         |         |         |         |         |         |         |         |         |         |         |         |
|---------|---------|---------|---------|---------|---------|---------|---------|---------|---------|---------|---------|---------|
| 829912  | 418218  | 656670  | 186392  | 400856  | 787781  | 378425  | 211572  | 372113  | 562611  | 319575  | 382059  | 312025  |
| NA      | 167903  | 266729  | 261090  | NA      | 202322  | 236493  | 196016  | NA      | 267252  | NA      | NA      | 377855  |
| 3204338 | 3361798 | 5353960 | 4647593 | 2802178 | 4728106 | 4527702 | 4289366 | 3065652 | 5375717 | 2386549 | 1272758 | 7635652 |
| 336758  | 356511  | 313778  | 378009  | 301772  | 393022  | 309538  | 394995  | 388054  | 357231  | 408496  | 362590  | 326581  |
| 416664  | 230269  | 450256  | 159322  | 139970  | 150956  | 102906  | 114325  | 143353  | 168342  | 124263  | 220855  | 287776  |
| 1397342 | 1078796 | 997073  | 1968851 | 757737  | 1429564 | 1918536 | 2257959 | 1426824 | 1650534 | 897460  | 428841  | 1133136 |
| 1256034 | 1335766 | 1167568 | 1223902 | 1116643 | 1394538 | 1106891 | 1294482 | 1455886 | 1346503 | 1305144 | 1421833 | 1134254 |
| 197390  | 259722  | 171432  | 175098  | 124907  | 333704  | 467051  | 177392  | 241866  | 218382  | 179955  | NA      | 138734  |
| 389171  | 379065  | 342051  | 399558  | 339717  | 459689  | 287797  | 422818  | 408906  | 399184  | 417146  | 408722  | 349018  |
| 3185073 | 1461917 | 1977095 | 813044  | 1150534 | 1771858 | 1397518 | 1040986 | 997201  | 1604839 | 963108  | 1534109 | 1597828 |
| 1916485 | 898439  | 1274594 | 495386  | 694559  | 1061831 | 846104  | 642776  | 615817  | 1013012 | 595696  | 920324  | 973576  |
| 619537  | 2212549 | 721273  | 505904  | 689692  | 4118992 | 370348  | 329417  | 407078  | 540391  | 172515  | 517792  | 1873229 |
| 1041426 | NA      | 623948  | 823699  | 423428  | 116791  | 1629667 | 857701  | 479733  | 836163  | 866260  | 768986  | 1040919 |
| 662880  | NA      | 417777  | 520328  | 265798  | NA      | 1051170 | 556103  | 307769  | 550068  | 551649  | 486703  | 668314  |
| 567281  | 220939  | 367136  | 170453  | 132425  | 161262  | 152701  | 111494  | NA      | 145118  | NA      | 194634  | 388748  |
| 1122678 | 1183879 | 992637  | 1143128 | 995612  | 1302833 | 996796  | 1206329 | 1288148 | 1209018 | 1165375 | 1229486 | 977722  |
| 502056  | 264269  | 134914  | 259786  | 307701  | 458810  | 939627  | 791497  | 398328  | 595183  | 467527  | 280495  | 311420  |

|         |         |         |         |         |         |         |         |         |         |         |         |         |
|---------|---------|---------|---------|---------|---------|---------|---------|---------|---------|---------|---------|---------|
| 313226  | 151834  | NA      | 163864  | 191384  | 282181  | 614417  | 502594  | 227493  | 375357  | 290615  | 173209  | 196334  |
| 295628  | 307659  | 282947  | 289315  | 274497  | 348863  | 242976  | 356876  | 351666  | 316493  | 346201  | 344215  | 284295  |
| 1514448 | 500830  | 905450  | 446134  | 353416  | 426618  | 426757  | 367352  | 316043  | 439563  | 346261  | 569117  | 1261179 |
| 1077823 | 342154  | 624545  | 294796  | 245101  | 291218  | 292166  | 245637  | 206218  | 296075  | 227469  | 391304  | 876320  |
| 2445375 | 2960960 | 1250233 | 660672  | 1992640 | 3284813 | 2023180 | 987191  | 1782719 | 2518157 | 1405648 | 1250161 | 922672  |
| 1768710 | 2106987 | 925220  | 486665  | 1407530 | 2372756 | 1470471 | 717092  | 1277410 | 1832960 | 1019090 | 899127  | 676461  |
| 1037851 | 1063354 | 887358  | 1037745 | 900768  | 1196345 | 856834  | 1078469 | 1126126 | 1059821 | 1061177 | 1098254 | 878936  |
| 179412  | 214577  | 103673  | NA      | 162257  | 228926  | 151978  | 99919   | 163578  | 190361  | 127163  | 120494  | 84925   |
| 5860054 | 2536848 | 1970086 | 1422768 | 1960275 | 2470882 | 2467086 | 1997781 | 1270341 | 2290017 | 1604291 | 2184880 | 3522977 |
| 4445053 | 1877322 | 1425475 | 1070381 | 1455061 | 1866725 | 1869692 | 1480541 | 922196  | 1664167 | 1197694 | 1646344 | 2624764 |
| 243774  | 224752  | 213939  | 240260  | 204117  | 293884  | 194276  | 268877  | 263076  | 235027  | 252810  | 250900  | 211241  |
| 211725  | 63309   | 85914   | 106650  | NA      | 83079   | NA      | 137878  | 188568  | 94055   | 96922   | 86314   | NA      |
| 203126  | NA      | 95846   | 101240  | 62192   | 98551   | NA      | 121915  | 140518  | 90107   | 96052   | 75493   | NA      |
| 102284  | NA      | 130802  | 196265  | NA      | NA      | 354196  | 131408  | 254225  | 164966  | 134950  | NA      | NA      |
| 185600  | 127259  | 344372  | NA      | 195858  | 191785  | 185441  | NA      | 216800  | 239229  | 118103  | 135231  | 221929  |
| 803005  | 840396  | 698347  | 804511  | 703186  | 952620  | 658659  | 848680  | 888823  | 812962  | 811362  | 879509  | 682854  |
| 366061  | 316368  | 170006  | 324112  | 457279  | 542864  | 388045  | 201595  | 149077  | 477926  | 812515  | 377916  | 300006  |

|         |        |        |        |        |        |         |        |        |        |         |        |         |
|---------|--------|--------|--------|--------|--------|---------|--------|--------|--------|---------|--------|---------|
| 271394  | 221798 | 112456 | 250655 | 342458 | 396410 | 286120  | 141342 | 105994 | 342127 | 623286  | 275509 | 224344  |
| 196976  | 200716 | 158930 | 175059 | 162117 | 235528 | NA      | 208511 | 203479 | 197015 | 189143  | 200317 | 165503  |
| 1286109 | 886701 | 542612 | 750602 | 977223 | 861931 | 617895  | 528298 | 229316 | 815433 | 1180182 | 993059 | 1074546 |
| 1003415 | 677026 | 410425 | 579716 | 760075 | 674342 | 469554  | 421831 | 172564 | 630328 | 928929  | 763974 | 849115  |
| 192390  | NA     | 104212 | 110050 | 80760  | 102533 | 85577   | 132299 | 144526 | 103116 | 90566   | 79377  | NA      |
| 192279  | 66430  | 88573  | 116516 | 70987  | 85187  | 60283   | 115112 | 155661 | 94462  | 99106   | 84639  | NA      |
| 681179  | 703985 | 592923 | 667851 | 586573 | 786694 | 578052  | 748632 | 785387 | 680558 | 695436  | 747598 | 600568  |
| 253536  | 210414 | 190370 | 446889 | 182263 | 384890 | 1008571 | 307473 | 499492 | 496926 | 372102  | 216705 | 127828  |
| 157515  | 165206 | 147827 | 166779 | NA     | 173451 | NA      | 193094 | 191297 | 177100 | 172594  | 181087 | 145452  |
| 396796  | 423191 | 398394 | 415928 | 372401 | 505635 | 365506  | 486449 | 481760 | 467315 | 422022  | 469978 | 381263  |
| 297312  | 295479 | 265526 | 287688 | 257570 | 364170 | 236012  | 348525 | 310602 | 289887 | 289504  | 328328 | 253174  |

| D120378  | D120379  | D120394  | D120395  | D120401  | D120402  | D120403  | D120404  | D120405  | D120406  | D120443  | D120444  | D120445  | D120446  | D120447  |
|----------|----------|----------|----------|----------|----------|----------|----------|----------|----------|----------|----------|----------|----------|----------|
| 1918478  | 189009   | 2581218  | 1136770  | NA       | 494400   | 782033   | NA       | 2065087  | 354942   | 1184063  | NA       | 425509   | 167523   | NA       |
| 709869   | 625071   | 619861   | 1082107  | 1515795  | 676641   | 801726   | 2202208  | 620755   | 886616   | 1111364  | 1233672  | 930145   | 638599   | 1219486  |
| 1689682  | 2019686  | 2076605  | 1840361  | 1944210  | 2710461  | 2824863  | 1452656  | 1554062  | 1713598  | 1632647  | 2102027  | 1767271  | 1030938  | 2716948  |
| 283144   | 272467   | 446606   | 341609   | 456978   | 259057   | 371723   | 419762   | 411002   | 572810   | 397935   | 658246   | 554958   | 387912   | 514889   |
| 913461   | 1050139  | 1004762  | 850135   | 955632   | 1451952  | 1134460  | 838559   | 1047232  | 1230003  | 969660   | 923002   | 879123   | 680544   | 1050428  |
| 157386   | 153082   | 142691   | 206670   | 137001   | 222147   | 171280   | 165371   | 175236   | 161630   | 177851   | 147109   | 157971   | 175397   | 192719   |
| 2790846  | 4195372  | 4066949  | 4748495  | 4263915  | 5723683  | 5290053  | 5115276  | 4585652  | 4227432  | 5728746  | 5797379  | 4714271  | 6022305  | 8297584  |
| 29645937 | 24914525 | 24814138 | 39033283 | 20672674 | 24782933 | 19884372 | 32124397 | 15183379 | 23013975 | 25206490 | 30856720 | 26897780 | 25611886 | 35149931 |
| NA       | 685694   | 537450   | 476389   | 133693   | 486633   |
| 3480799  | 4132625  | 2174125  | 4769821  | 2878679  | 2818124  | 3444131  | 1985883  | 2912603  | 4600810  | 2694493  | 2835012  | 5541871  | 2273302  | 4218983  |
| 31933245 | 23411277 | 34022672 | 28042502 | 31938700 | 29510178 | 28053877 | 38605343 | 24692132 | 26023191 | 26790604 | 26524991 | 29567436 | 22985564 | 32651400 |
| 974580   | 440791   | 463648   | 637767   | 478623   | 648844   | 663770   | 676805   | 465000   | 723450   | 858555   | 625664   | 622672   | 488682   | 791411   |
| 1887843  | 1581173  | 2605209  | 1491967  | 1654468  | 1741822  | 2467841  | 2062591  | 1928912  | 1671135  | 2041709  | 1781841  | 1716690  | 4539904  | 2344162  |
| 2907130  | 4144847  | 4506762  | 3590696  | 4103411  | 3306191  | 4428515  | 5347934  | 3630221  | 3768569  | 3973441  | 4634873  | 2791350  | 3380698  | 6499749  |
| 325279   | 295508   | 171660   | 345335   | 363900   | 260980   | 182869   | 214119   | 309375   | 323271   | 146932   | 122677   | 191026   | NA       | 137323   |

|          |          |          |          |          |          |          |          |          |          |          |          |          |          |          |
|----------|----------|----------|----------|----------|----------|----------|----------|----------|----------|----------|----------|----------|----------|----------|
| 230060   | 1230445  | 510863   | 297013   | 144963   | 1013598  | 957568   | 1415358  | 189368   | 310353   | 1228011  | 1540952  | 1598144  | 3048722  | 2960619  |
| 344387   | 306252   | 263906   | 288835   | 256077   | 278061   | 248152   | 300511   | 285634   | 337350   | 296738   | 243350   | 308355   | 574061   | 307790   |
| 1519527  | 1275347  | 1905576  | 1390630  | 1277946  | 1945313  | 2053017  | 1964403  | 1647770  | 1607893  | 2174314  | 2138812  | 1765384  | 1882822  | 3084854  |
| 783078   | 1359983  | 2092776  | 581154   | 777014   | 390496   | 884856   | 797511   | 533622   | 1304677  | 1084627  | 1265765  | 1446483  | 847766   | 1177856  |
| 75714    | 101320   | NA       | 130375   | NA       | NA       | NA       | 75706    | 135033   | 87545    | 134548   | 95713    | 108336   | NA       | 115047   |
| 823855   | 736566   | 874874   | 832386   | 813281   | 1086955  | 811846   | 713654   | 829575   | 873525   | 863291   | 777746   | 920194   | 634408   | 778655   |
| 93371    | 142200   | 128660   | 112628   | 117946   | 161785   | 144697   | 125358   | NA       | 109825   | 86481    | 78026    | NA       | NA       | 118480   |
| 8912167  | 1977730  | 5556944  | 5628355  | 4688806  | 4118973  | 4011035  | 2500280  | 3844066  | 7471831  | 5900105  | 2146175  | 4847055  | 1793550  | 3066852  |
| 19553870 | 13415989 | 18203994 | 14189198 | 15228404 | 13841570 | 14383118 | 28542801 | 12910352 | 12664226 | 15112506 | 12909690 | 15882157 | 15136178 | 15026933 |
| 28892183 | 19593585 | 29061484 | 20031666 | 24398157 | 24228903 | 21510436 | 39128593 | 23219007 | 21352828 | 26439632 | 21477823 | 25166156 | 22803393 | 30832479 |
| 216595   | 237837   | 410350   | 265136   | 368085   | 210602   | 296730   | 311172   | 330180   | 445386   | 323863   | 545297   | 464026   | 505030   | 441085   |
| 223067   | 160277   | 200075   | 124475   | 115596   | 180057   | 184736   | 200214   | 131768   | 167433   | 201723   | 176788   | 175818   | 437062   | 181493   |
| 474906   | 392699   | 578231   | 392267   | 427521   | 441509   | 749457   | 645291   | 241758   | 349117   | 534185   | 537251   | 411807   | 254247   | 749195   |
| 282582   | 203818   | 228542   | 191918   | 219438   | 217707   | 198075   | 153230   | 194766   | 208437   | 160188   | 157918   | 249585   | 159178   | 190655   |
| 199955   | 667366   | 237758   | 199300   | 168162   | 208876   | 222341   | 201141   | 230172   | 200618   | 256936   | 295740   | 254237   | 178933   | 341630   |
| 193413   | 149035   | 213390   | 137546   | 136517   | 128235   | 162369   | 151364   | 114076   | 119492   | 174431   | 189465   | 182772   | 596456   | 161245   |
| 191855   | 186225   | 163574   | 149473   | 227874   | 209629   | 123972   | 157466   | 144711   | NA       | 144113   | 179675   | 161874   | 156378   | 195558   |

|         |         |         |         |         |         |         |         |         |         |         |         |         |         |         |
|---------|---------|---------|---------|---------|---------|---------|---------|---------|---------|---------|---------|---------|---------|---------|
| 173582  | 100419  | 115570  | 169295  | 136224  | 191017  | 151344  | 116254  | 105798  | 163050  | NA      | NA      | 143427  | 99752   | 202056  |
| 105488  | NA      | 87088   | 93488   | 94566   | NA      | 87600   | NA      | 85881   | 83985   | 107754  | 76824   | 94600   | 59142   | 101315  |
| 71440   | NA      | 68866   | NA      | 76186   | 98738   | 63961   | 74566   | NA      | NA      | 85229   | NA      | 74795   | NA      | 90933   |
| 2025059 | 1374097 | 1048848 | 1465289 | 2929984 | 2438598 | 4935874 | 2200630 | 2039250 | 2598340 | 1303372 | 1266776 | 1224153 | 1419624 | 1799966 |
| 1171737 | 897907  | 1375721 | 1144882 | 1171031 | 1202825 | 973981  | 1060628 | 1231899 | 1229094 | 1323256 | 1321146 | 1024079 | 1497203 | 1429185 |
| 744377  | 530667  | 847778  | 724951  | 772208  | 772186  | 603887  | 686554  | 752434  | 755863  | 825740  | 853001  | 652322  | 1005084 | 952299  |
| 5393364 | 2991348 | 415272  | 699015  | 296620  | 1563305 | 638373  | 236813  | 2218422 | 5355851 | 621718  | 152977  | 1305517 | 1636793 | 4199347 |
| 179117  | 173925  | 175556  | 186804  | 187545  | 233915  | 160715  | 164656  | 186003  | 190177  | 184540  | 186867  | 171884  | 82305   | 192491  |
| 2526369 | 2151676 | 1317627 | 2449644 | 3023362 | 1815620 | 1502467 | 1776885 | 2400678 | 2712818 | 1201261 | 966786  | 1494795 | 486394  | 1079476 |
| NA      | 244687  | 237318  | 246692  | 205925  | 278345  | 379527  | 208497  | 230674  | 262196  | 376112  | 425464  | 340413  | 362753  | 429575  |
| 3918007 | 3816594 | 3089258 | 3508967 | 3204108 | 3563288 | 2931017 | 3545120 | 3518263 | 3773960 | 3636877 | 2887417 | 3393943 | 2547741 | 3855817 |
| 1139476 | 817419  | 1218200 | 603647  | 637403  | 1270167 | 1163607 | 974177  | 805327  | 923262  | 1217523 | 1214542 | 930191  | 588637  | 1324422 |
| 928842  | 348764  | 551030  | 481819  | 927677  | 803901  | 431233  | 541682  | 400081  | 426397  | 405939  | 481012  | 525592  | 563241  | 669486  |
| 363000  | 475060  | 727474  | 416507  | 591899  | 526290  | 560454  | 642189  | 531885  | 338351  | 408027  | 382510  | 405675  | 266835  | 608717  |
| 1988856 | 1821728 | 2337900 | 2294003 | 2113250 | 1765861 | 2136055 | 2256732 | 2353382 | 2382040 | 2443153 | 2220440 | 2365487 | 2100622 | 2479073 |
| 6197087 | 4713984 | 5539443 | 4056551 | 3876299 | 5573580 | 4781417 | 5868385 | 3890930 | 4975975 | 5678195 | 5275410 | 4956117 | 4609217 | 5579266 |
| 647409  | 560964  | 713964  | 727824  | 712449  | 536218  | 663753  | 728486  | 739899  | 746995  | 748643  | 693643  | 719180  | 680248  | 789173  |



|          |          |          |          |          |          |          |          |          |          |          |          |          |          |          |
|----------|----------|----------|----------|----------|----------|----------|----------|----------|----------|----------|----------|----------|----------|----------|
| 171082   | 172220   | 257566   | 198079   | 277945   | 168806   | 236930   | 253222   | 244538   | 357876   | 244588   | 407092   | 332036   | 245441   | 326153   |
| 262144   | 199265   | 246827   | 174740   | 161594   | 241111   | 225364   | 251801   | 161123   | 220920   | 243480   | 218267   | 227434   | 199075   | 260480   |
| 250142   | 164109   | 184084   | 277742   | 332127   | 369814   | 244527   | 233580   | 208409   | 273741   | 166988   | 188061   | 133595   | 252589   | 277658   |
| 252337   | 214451   | 162034   | 220510   | 249122   | 297267   | 227912   | 183977   | 182792   | 238532   | 186813   | 219643   | 247873   | 173575   | 272131   |
| 9851648  | 9087113  | 10821835 | 10472087 | 10218844 | 13533096 | 9637945  | 8944330  | 10143265 | 10405412 | 10639503 | 9658749  | 10998356 | 9519216  | 10013728 |
| 130180   | 107848   | 129311   | 120554   | 130247   | NA       | 118569   | 113071   | 128217   | 135299   | 112240   | 115868   | 119702   | 147469   | 137726   |
| 220358   | 469899   | 624073   | 561386   | 469753   | 337881   | 739822   | 235917   | 360227   | 274712   | 392837   | 396498   | 325464   | 166042   | 358864   |
| 3046357  | 3246011  | 3504734  | 4599326  | 4406365  | 3294112  | 3500148  | 2529036  | 2840636  | 3774561  | 4120742  | 3374546  | 3130006  | 3787251  | 5159210  |
| 2161084  | 1662997  | 801492   | 1912161  | 2829129  | 1155686  | 1163744  | 1476372  | 1914445  | 2521411  | 812815   | 550030   | 942324   | 257029   | 733265   |
| 148701   | 107682   | 94184    | NA       | 165220   | 133759   | 82530    | 93426    | NA       | NA       | 94683    | 112095   | 93628    | NA       | 129101   |
| 345733   | 255919   | 384495   | 233220   | 240348   | 227393   | 281956   | 298880   | 195190   | 210729   | 308496   | 328931   | 361742   | 968692   | 280822   |
| 26954044 | 21603014 | 32610096 | 22990834 | 22930583 | 25475528 | 32717248 | 30829768 | 25829618 | 23623722 | 31359701 | 25430920 | 23929244 | 26178109 | 29220884 |
| 4466680  | 5146946  | 5841888  | 5645629  | 4537167  | 5665672  | 4263282  | 5023897  | 4060480  | 4808166  | 4324866  | 6142614  | 5793774  | 6048214  | 5513299  |
| 760254   | 874230   | 810808   | 741096   | 780606   | 1232170  | 929621   | 687414   | 815901   | 1006157  | 818404   | 717833   | 706104   | 487110   | 838754   |
| 563710   | 627262   | 741421   | 257879   | 355608   | 516060   | 432333   | 416891   | 324474   | 414412   | 694244   | 672354   | 543328   | 404443   | 531707   |
| 157183   | 391405   | 231254   | 326727   | 160680   | 186895   | 306963   | 281553   | 77671    | 182954   | NA       | NA       | NA       | NA       | NA       |
| 415140   | 670642   | 488172   | 133319   | 681045   | 418324   | 631726   | 557858   | 449080   | 528008   | 732084   | 532139   | 347749   | 633776   | 893594   |

|          |         |          |         |         |         |         |          |         |         |          |          |          |          |         |
|----------|---------|----------|---------|---------|---------|---------|----------|---------|---------|----------|----------|----------|----------|---------|
| 346256   | NA      | 406559   | 143495  | 313022  | NA      | NA      | 287274   | 353371  | 269097  | 381685   | 359823   | 141513   | 302004   | 312002  |
| 102879   | 78972   | 82780    | 100192  | 101399  | 137862  | 98142   | 87779    | 82320   | 102126  | 83683    | 87652    | 91130    | NA       | 85610   |
| NA       | 586786  | 141498   | 1729747 | 720065  | 345618  | 763593  | 186590   | 426249  | 595481  | NA       | 409286   | 494696   | 272770   | 285987  |
| 332371   | 243223  | 98569    | 2180862 | 1128346 | 268803  | 1493558 | NA       | 283613  | 293098  | 765604   | 508190   | 1082759  | 433910   | 800834  |
| 11660330 | 8526616 | 11935207 | 8423462 | 8122171 | 8577251 | 9835907 | 10959319 | 7452297 | 7747316 | 10921271 | 11453830 | 11313892 | 12335583 | 9381311 |
| 189951   | 108973  | 160368   | 345789  | 201872  | 231580  | 144324  | 472272   | NA      | 189477  | 153964   | 166121   | 504711   | 104448   | 245923  |
| NA       | NA      | 827460   | NA      | NA      | NA      | NA      | NA       | NA      | NA      | 298673   | 693738   | 661232   | 614004   | 463655  |
| 1928340  | 1315669 | 1824977  | 1431169 | 1215677 | 938183  | 1235694 | 1643627  | 1517866 | 1239546 | 2052850  | 1743437  | 1807657  | 4292130  | 1702155 |
| 258279   | 234756  | 232971   | 273272  | 311773  | 321757  | 245797  | 238944   | 313026  | 281037  | 294055   | 273830   | 278385   | 259640   | 306476  |
| NA       | 125406  | 239250   | 288477  | 211249  | 152115  | NA      | NA       | NA      | 259062  | 196848   | 280175   | 619635   | 337484   | 220015  |
| 156836   | 394512  | NA       | 2505334 | 2151412 | 244503  | 2557153 | NA       | 148619  | 212377  | 1783283  | 572570   | 2213473  | 392766   | 579462  |
| 104400   | 173786  | 164608   | 135108  | 153345  | 113252  | 133531  | 148991   | 167271  | 171880  | 159371   | 171140   | 193397   | NA       | 167088  |
| 528377   | NA      | 637430   | NA      | 561895  | NA      | NA      | 469457   | 553945  | 564289  | 605125   | 625790   | NA       | 745879   | 666775  |
| 504980   | NA      | 632874   | NA      | 559533  | NA      | NA      | 460214   | 557304  | 548937  | 592769   | 596753   | NA       | 728189   | 621844  |
| 5551276  | 4793608 | 4059436  | 5679082 | 6891776 | 4673877 | 4426842 | 5273857  | 6411094 | 5965038 | 4668865  | 4023516  | 4346838  | 4348574  | 5270808 |
| 213569   | NA      | 189696   | NA      | 235891  | NA      | NA      | 176970   | 436339  | NA      | 387893   | 411304   | 135908   | 292598   | 259922  |
| 2601732  | 4192322 | 3950439  | 4070727 | 5251785 | 4226979 | 3933453 | 6150555  | 2752237 | 3664444 | 2896510  | 2692608  | 2508311  | 1814472  | 4490385 |

|          |          |          |          |          |          |          |          |          |          |          |          |          |          |          |
|----------|----------|----------|----------|----------|----------|----------|----------|----------|----------|----------|----------|----------|----------|----------|
| 21042266 | 13269126 | 19144755 | 15423076 | 14132536 | 11278114 | 13481890 | 18375233 | 16819597 | 14749612 | 22252766 | 19119566 | 18919692 | 18119520 | 17449302 |
| 597281   | 505538   | 762621   | 718817   | 660084   | NA       | 640253   | 709099   | 697278   | 673226   | 804102   | 738167   | 724649   | 835998   | 833464   |
| 281443   | 263224   | 314197   | 297605   | 261773   | 394105   | 302483   | 221701   | 266301   | 322421   | 199041   | 228642   | 339753   | 111383   | 254398   |
| 354869   | NA       | 447270   | 416485   | 398013   | NA       | 395262   | 426538   | 471464   | 416972   | 496741   | 450943   | 453565   | 533170   | 539137   |
| 608706   | 1123158  | 716496   | 351863   | 422759   | 313092   | 1020541  | 441852   | 407248   | 485574   | 543907   | 898698   | 438588   | 493268   | 775002   |
| 245359   | 273905   | 292863   | 298384   | 233228   | 287986   | 224159   | 290786   | 210315   | 291310   | 213203   | 335179   | 264181   | 288076   | 360903   |
| 124316   | NA       | 145874   | 126446   | 119156   | 166334   | 101275   | 130458   | 125195   | NA       | 141038   | NA       | 91928    | 136863   | NA       |
| 85418    | 127804   | 148263   | 136942   | 133960   | 111519   | 98095    | 87536    | 121418   | 135429   | 111123   | 154384   | 120226   | 129615   | 124430   |
| 2174585  | 1772276  | 2663131  | 2145535  | 2376750  | 1948200  | 2031160  | 2079884  | 2299854  | 2390062  | 2279667  | 2281129  | 2217961  | 2414940  | 2284118  |
| 213459   | 222542   | 368965   | 365851   | 358044   | 344092   | 474835   | 268799   | 141882   | 354718   | 218502   | 334311   | 334514   | 298296   | 344304   |
| 647761   | 532020   | 792409   | 634738   | 678808   | 558170   | 608212   | 627746   | 710402   | 719559   | 663379   | 651244   | 676244   | 731627   | 655770   |
| 137683   | 131021   | 85184    | 115026   | 156032   | 105334   | 128624   | 126089   | 152024   | 172436   | 94388    | 78354    | 78044    | 81862    | 115138   |
| 126595   | 107895   | 109456   | 120199   | 130169   | 169229   | 114496   | 110320   | 117288   | 114192   | 109743   | 109462   | 132738   | NA       | 131781   |
| 7133836  | 6598722  | 8060011  | 7429989  | 7577146  | 9621689  | 6993927  | 6514207  | 7745472  | 7546427  | 7504871  | 6686906  | 8030955  | 7591553  | 7554334  |
| 431429   | 514569   | 541853   | 535133   | 546535   | 901352   | 600036   | 614428   | 708899   | 591282   | 659340   | 673750   | 550480   | 373283   | 749890   |
| 89046    | NA       | 118969   | 92437    | 104358   | 153547   | 131367   | 117637   | 119152   | 100410   | 180014   | 150205   | 132910   | 123640   | 236987   |
| 646286   | 558481   | 418324   | 1334830  | 229947   | 289813   | 268468   | 1061782  | NA       | 328726   | 452850   | 753777   | 497608   | 375387   | 962571   |

|         |         |         |         |         |         |        |        |        |         |        |        |        |         |         |
|---------|---------|---------|---------|---------|---------|--------|--------|--------|---------|--------|--------|--------|---------|---------|
| 87709   | NA      | 160141  | 117153  | 160648  | NA      | 96793  | 266091 | NA     | 99856   | 121043 | 120303 | 115996 | 137277  | 189538  |
| 129011  | 120864  | 132941  | 131530  | 119054  | 169979  | 141633 | 97122  | 114681 | 131507  | 76392  | 91098  | 144218 | NA      | 101434  |
| 662926  | 642072  | 832028  | 782966  | 852153  | 978451  | 605889 | 629028 | 803471 | 650930  | 791832 | 764703 | 796420 | 1049882 | 873958  |
| 86701   | 97105   | 103057  | 85743   | 108979  | 133602  | 78997  | 93656  | 125754 | 83128   | 100884 | 106973 | 89683  | 70249   | 117576  |
| 594633  | 847072  | 443584  | 741855  | 1088260 | 317754  | 522907 | 751525 | 600967 | 780611  | 296664 | 311470 | 350375 | 443120  | 479647  |
| 611170  | 702676  | 667595  | 600994  | 639487  | 1015488 | 740413 | 554906 | 649561 | 775812  | 633902 | 581081 | 594642 | 510344  | 656655  |
| 185169  | 223413  | 171481  | 156194  | 162579  | NA      | 272731 | 144211 | NA     | 156461  | 122592 | 147277 | NA     | 141349  | 174596  |
| 138615  | 155106  | 244716  | 139098  | 321791  | 272389  | 236086 | 175303 | 237029 | 233080  | 183865 | 158283 | 132378 | 86496   | 228756  |
| NA      | NA      | 259439  | NA      | 119409  | NA      | NA     | 159899 | NA     | NA      | 195005 | 256910 | 129384 | 132896  | 272841  |
| NA      | NA      | 182930  | NA      | NA      | 169688  | 159165 | 133997 | NA     | NA      | 234100 | 236213 | 147747 | 105240  | 306701  |
| 2260374 | 1318474 | 410020  | 2000058 | 1843841 | 1127716 | 355015 | 654054 | 741166 | 1219767 | 644087 | 476563 | 418324 | 2124152 | 1182354 |
| 323883  | 245546  | 406878  | 261012  | 163625  | 341537  | 522927 | 507051 | 301123 | 337205  | 572801 | 495896 | 372400 | 416458  | 780837  |
| 353111  | 243343  | 418554  | 305244  | 322207  | 289512  | 299374 | 337986 | 368437 | 387516  | 439628 | 438617 | 360595 | 400356  | 433766  |
| NA      | NA      | 106021  | NA      | NA      | NA      | 81311  | 86741  | 99481  | 67951   | 109048 | 120437 | 97924  | 108484  | 119980  |
| 185014  | 565085  | 1121080 | NA      | 775276  | 344071  | 591506 | 425525 | 551895 | 216263  | 144992 | 247244 | 388870 | 163695  | 204213  |
| NA      | 218372  | NA      | 189641  | 261844  | 296726  | 236853 | 184669 | 189635 | NA      | 227517 | 259808 | 255329 | 209362  | 162312  |
| 70405   | 113661  | 139236  | 98378   | 114380  | 101180  | 93933  | 103290 | 104976 | 84265   | 114576 | 132065 | 87348  | 169625  | 168471  |

|         |         |         |         |         |         |         |         |         |         |         |         |         |         |         |
|---------|---------|---------|---------|---------|---------|---------|---------|---------|---------|---------|---------|---------|---------|---------|
| 783535  | 784972  | 845200  | 767296  | 766496  | 1046518 | 773846  | 726854  | 853941  | 817172  | 805126  | 774913  | 758246  | 461955  | 876115  |
| NA      | 418324  | 583671  | 534568  | 537018  | NA      | 501539  | 564935  | 557882  | 564973  | 573742  | NA      | 525789  | 581055  | 598786  |
| 246026  | 348001  | 280254  | 244160  | 118287  | 326358  | 259498  | 342010  | 326371  | 327075  | 360699  | 379816  | 344924  | 420199  | 664361  |
| 168660  | NA      | NA      | NA      | 270983  | 177223  | 209711  | 139171  | 208239  | 123399  | 103509  | 110092  | NA      | 259781  | 419933  |
| 246385  | 207780  | 250226  | 233322  | 210644  | 311057  | 236969  | 173349  | 219663  | 294712  | 135625  | 164164  | 285070  | 214778  | 202589  |
| 992156  | 748678  | 311301  | 793724  | 2034909 | 546893  | 302969  | 525198  | 596933  | 666710  | 218259  | 242055  | 258029  | 909931  | 416721  |
| 198040  | NA      | 237324  | NA      | 273282  | 229554  | 266411  | 184078  | 425255  | 201406  | 112346  | 191374  | NA      | 354919  | 396039  |
| 447584  | 178380  | 107433  | 341450  | 274624  | 226168  | 200462  | 224053  | 185255  | 315610  | 233697  | 144458  | 119667  | 395513  | 289659  |
| 1119803 | 934994  | 1357458 | 1127218 | 1133635 | 1131015 | 1090795 | 993942  | 1041558 | 1200028 | 1152025 | 1193626 | 1289541 | 1109478 | 1143013 |
| 319346  | 282226  | 412679  | 326841  | 316015  | NA      | 316690  | 285311  | NA      | 315343  | 321667  | 334966  | 353178  | 320624  | 328234  |
| 509847  | 283744  | 188165  | 461829  | 277741  | 570518  | 366363  | 526628  | 332993  | 306677  | 312714  | 359196  | 217753  | NA      | 273064  |
| 165055  | 183578  | 219943  | 232105  | 138448  | NA      | 172512  | 184095  | 185807  | 248136  | 282443  | 158940  | 248505  | 175224  | 198748  |
| 482479  | 257149  | 134727  | 260521  | 654384  | 198375  | 120075  | 316787  | 255999  | 214758  | 115218  | 78513   | 125740  | 489815  | 184997  |
| 4030819 | 3724219 | 4396918 | 4187772 | 4061103 | 5649774 | 3835062 | 3572013 | 4240281 | 4073267 | 4030457 | 3719735 | 4622431 | 3825090 | 3779328 |
| 139128  | 150913  | 167135  | 133008  | 148472  | 170367  | 138892  | 123366  | 150956  | 157958  | 144092  | 144532  | 158724  | 103053  | NA      |
| 2554938 | 2020357 | 829862  | 2464752 | 2287927 | 1857404 | 1114551 | 1547556 | 1756246 | 2293405 | 1167793 | 1042961 | 958700  | 2987384 | 2539823 |
| 348513  | 392779  | 382977  | 367126  | 384166  | 574661  | 469132  | 329453  | 411506  | 473873  | 362512  | 336999  | 359061  | 251309  | 381305  |

|         |         |         |         |         |         |         |         |         |         |         |         |         |         |         |
|---------|---------|---------|---------|---------|---------|---------|---------|---------|---------|---------|---------|---------|---------|---------|
| 2701041 | 805640  | 2586000 | 1239244 | 2259551 | 2578207 | 1157960 | 1510920 | 3284518 | 1196024 | 1517264 | 1586955 | 624701  | 3022763 | 3144747 |
| 1297327 | 931191  | 332500  | 936808  | 1402698 | 465146  | 431177  | 623418  | 876782  | 1102866 | 215333  | 215223  | 442873  | 322642  | 256235  |
| 163301  | 143503  | 208523  | 178759  | 216343  | 178510  | 142366  | 186915  | 170515  | 140240  | 188812  | 176511  | 180124  | 116022  | 205118  |
| 1261488 | 1820147 | 1994006 | 1785612 | 1202704 | 1564444 | 1172620 | 1716665 | 1103255 | 1389223 | 1195979 | 2132313 | 2095788 | 1968447 | 1897563 |
| 645101  | 394754  | 122177  | 371206  | 686195  | 162826  | 193585  | 247553  | 375215  | 511641  | 88394   | NA      | 155288  | 173372  | 104246  |
| 105211  | 87958   | 128880  | 89604   | 86399   | NA      | 79880   | 129221  | NA      | NA      | 94214   | 81228   | 103064  | 58543   | 84447   |
| 125232  | 107040  | 148902  | 109487  | 119982  | 137867  | 95538   | 150966  | 135699  | 111729  | 137856  | 128679  | 159184  | 94674   | 160326  |
| 415417  | 375333  | 542487  | 433211  | 413935  | 347704  | 379130  | 447302  | 507188  | 470543  | 488582  | 465040  | 511524  | 437519  | 474946  |
| 1978569 | 2946941 | 2361115 | 2246196 | 1952930 | 1427598 | 1711237 | 2183731 | 530058  | 1732822 | 1092583 | 1301722 | 2324555 | 1434765 | 348748  |
| 209412  | NA      | 165424  | 134976  | 158832  | 163825  | 182528  | 146548  | 213553  | 162457  | 204014  | 192155  | 165533  | NA      | 311585  |
| 2807187 | 2252470 | 2936770 | 2887642 | 3070647 | 2667389 | 2771802 | 2678748 | 2993803 | 3130441 | 2534958 | 2780689 | 2783324 | 1634548 | 2933565 |
| 630531  | 651416  | 818752  | 737282  | 700429  | 797843  | 648041  | 615258  | 691142  | 708666  | 693225  | 680423  | 798420  | 694818  | 671312  |
| 288452  | 283389  | 332935  | 447659  | 335182  | 323379  | 274636  | 453052  | 336334  | 380804  | 261557  | 398762  | 261332  | 541128  | 584575  |
| 2501206 | 2345179 | 2835218 | 2623244 | 2576204 | 3450277 | 2432440 | 2203512 | 2681636 | 2758268 | 2624514 | 2326746 | 2951397 | 2451516 | 2551807 |
| 485298  | 378219  | 530468  | 295067  | 433735  | 389953  | 377507  | 272429  | 796704  | 415075  | 631938  | 539970  | 512075  | 211639  | 591284  |
| 1285318 | 1405634 | 1321014 | 1454503 | 1280373 | 1409908 | 1149101 | 1170015 | 1668952 | 1342353 | 1500293 | 1452596 | 1367439 | 1563995 | 1819434 |
| 239403  | 311807  | 265211  | 205280  | 246288  | 417269  | 287186  | 225618  | 284247  | 339484  | 264490  | 220020  | 253029  | 163352  | 265816  |

|         |         |         |         |         |         |         |         |         |         |         |         |         |         |         |
|---------|---------|---------|---------|---------|---------|---------|---------|---------|---------|---------|---------|---------|---------|---------|
| 172200  | NA      | 139732  | 144899  | NA      | NA      | NA      | 162132  | 157132  | 188105  | 179053  | 123858  | NA      | 107658  | 227119  |
| 188466  | 140673  | NA      | 502216  | 270834  | 419489  | 163504  | 249511  | 139515  | 258702  | NA      | 112800  | 125038  | 641208  | 170050  |
| 903642  | 712253  | 400155  | 883047  | 1200722 | 508851  | 516772  | 698086  | 936442  | 955869  | 430473  | 337907  | 476765  | 663812  | 504823  |
| 418324  | 183544  | 403478  | 263543  | 215346  | NA      | 213578  | 376769  | 274260  | 227354  | 464275  | 407209  | 340513  | 533088  | 273905  |
| NA      | NA      | 224259  | NA      | 241444  | NA      | NA      | NA      | 468182  | NA      | 222919  | 158662  | NA      | 456126  | 364435  |
| 418125  | 418179  | 509725  | 464169  | 450903  | 558596  | 439006  | 375097  | 428946  | 448921  | 444294  | 402668  | 499311  | NA      | 409578  |
| 1664644 | 1559953 | 1952136 | 1749171 | 1689635 | 2410525 | 1658220 | 1496703 | 1792905 | 1686882 | 1784744 | 1652940 | 1917580 | 1540195 | 1677625 |
| 105445  | 101367  | 119358  | 112332  | 114076  | 103819  | 128684  | 139292  | 141352  | 128583  | 129687  | 132420  | 131450  | 139999  | 153695  |
| 155874  | 177109  | 162126  | 155652  | 167012  | 263797  | 197155  | 143939  | 164404  | 208968  | 156038  | 136850  | 157925  | NA      | 157200  |
| 264938  | 303254  | 378978  | 315276  | NA      | NA      | 140155  | 225059  | NA      | NA      | 393852  | 220289  | 517150  | 290319  | 381415  |
| 302365  | 310325  | NA      | 347646  | 230483  | 262543  | 208910  | 305158  | 132472  | 158628  | 288065  | 264420  | 186995  | NA      | 112847  |
| 175812  | 165240  | 168934  | 168276  | 188343  | 206229  | 159725  | 143572  | 175329  | 172781  | 180514  | 165147  | 210709  | 237237  | 164981  |
| 300549  | 257339  | 399474  | 274589  | 127083  | NA      | 125669  | 326506  | 202366  | 416619  | 224318  | 172879  | 192428  | 189765  | 277251  |
| 1508147 | 1326666 | 1647657 | 1553616 | 1529381 | 1978399 | 1336050 | 1200809 | 1489525 | 1416249 | 1455454 | 1361240 | 1627190 | 1360212 | 1376581 |
| 216702  | 270773  | 577052  | 221627  | 135479  | NA      | 140039  | 383047  | 220188  | 592347  | 170919  | 196228  | 129336  | 107469  | 190940  |
| 184188  | 315401  | 363398  | 306248  | 165063  | 215952  | 162745  | 281402  | NA      | 213782  | 174537  | 439424  | 399046  | 322849  | 323200  |
| 1291471 | 810144  | 465513  | 1433605 | 564220  | 806026  | 756817  | 1197799 | 586678  | 766443  | 670998  | 909176  | 538690  | 98080   | 323122  |

|         |         |         |         |         |         |          |         |         |          |         |         |         |         |         |
|---------|---------|---------|---------|---------|---------|----------|---------|---------|----------|---------|---------|---------|---------|---------|
| 656464  | 438818  | 228959  | 746679  | 301938  | 412047  | 405854   | 649164  | 296675  | 398558   | 356856  | 481983  | 288473  | NA      | 169581  |
| NA      | 149216  | 219031  | 170802  | NA      | NA      | 120596   | 209429  | NA      | 263864   | 244835  | NA      | 216088  | NA      | 229740  |
| 2409339 | 2884916 | 4256618 | 3390060 | 1932691 | 1075490 | 2405927  | 3873225 | 2674913 | 5233464  | 4771103 | 2572261 | 4224615 | 3397573 | 4507878 |
| 382616  | 332244  | 416044  | 420149  | 413836  | 491425  | 339541   | 305715  | 379426  | 389118   | 418020  | 374175  | 434193  | 424548  | 388963  |
| 298535  | 363989  | NA      | 202181  | 212963  | 170746  | 216387   | 219858  | 133440  | 191955   | 255112  | 247277  | 165353  | NA      | NA      |
| 716127  | 1024200 | 2443897 | 878645  | 721332  | 549898  | 773945   | 1565928 | 983866  | 2816922  | 902113  | 1032970 | 1153722 | 751704  | 1270897 |
| 1393016 | 1243070 | 1520046 | 1455644 | 1416148 | 1793826 | 1271166  | 1175945 | 1392139 | 1433409  | 1448592 | 1297960 | 1540309 | 1351141 | 1293358 |
| NA      | 116864  | 243488  | 105439  | 170461  | NA      | 139925   | 347129  | NA      | 254657   | 182431  | 118914  | 198291  | 103322  | NA      |
| 409953  | 386826  | 433620  | 458843  | 451415  | 519048  | 341209   | 341514  | 409802  | 418324   | 438448  | 406393  | 523618  | 422112  | 389552  |
| 2617630 | 1949744 | 1114777 | 2321417 | 1026347 | 1130836 | 1770719  | 2058349 | 1123870 | 2096912  | 1408086 | 1956059 | 1085647 | 223245  | 490259  |
| 1688756 | 1219215 | 725179  | 1482889 | 636087  | 676987  | 1082820  | 1272700 | 688175  | 1319367  | 846021  | 1161049 | 681345  | 123111  | 287830  |
| 1368602 | 569705  | 574717  | 1952518 | 2617417 | 827871  | 18208393 | 6363622 | 2023385 | 16738229 | 244628  | 698894  | 560821  | 171217  | 383991  |
| 950352  | 143810  | 1030811 | 210394  | 1138911 | 409653  | 1005562  | 814222  | 1181710 | 1070629  | 944614  | 889152  | 391870  | 982743  | 719517  |
| 619456  | 84382   | 673931  | 137201  | 714026  | 261083  | 630471   | 524901  | 772917  | 672507   | 597398  | 556998  | 251315  | 624058  | 456353  |
| 324846  | 466773  | 124337  | 166567  | 145573  | NA      | 205679   | 209881  | 107944  | 235055   | 207976  | 213633  | 149809  | NA      | NA      |
| 1224377 | 1171055 | 1332002 | 1350846 | 1257606 | 1652221 | 1162988  | 1060379 | 1274376 | 1178226  | 1288454 | 1149842 | 1487054 | 1147873 | 1236222 |
| 415057  | 451966  | 939892  | 480375  | 383798  | 354209  | 151769   | 272042  | 616859  | 444827   | 652882  | 538794  | 350066  | 269430  | 335296  |



|         |         |         |         |         |         |         |         |         |         |         |         |         |         |         |
|---------|---------|---------|---------|---------|---------|---------|---------|---------|---------|---------|---------|---------|---------|---------|
| 265884  | 281702  | 612636  | 309839  | 235339  | 210468  | NA      | 162688  | 384632  | 287660  | 418628  | 337889  | 204302  | 166917  | 208271  |
| 302742  | 311961  | 367026  | 387281  | 353854  | 442623  | 280255  | 297604  | 369060  | 293080  | 336113  | 320080  | 401228  | 340039  | 349431  |
| 922098  | 1538650 | 398331  | 521514  | 460883  | 485637  | 590707  | 593137  | 307007  | 657407  | 695130  | 644748  | 529444  | NA      | 158236  |
| 637549  | 1057273 | 260238  | 352027  | 311942  | 327676  | 404983  | 405314  | 197131  | 451449  | 469998  | 448791  | 355666  | NA      | NA      |
| 1931454 | 2658671 | 1142210 | 3160191 | 1070137 | 1747596 | 778211  | 1874927 | 729233  | 1145397 | 1547812 | 1157937 | 1146601 | 229433  | 922166  |
| 1383539 | 1927838 | 841055  | 2295418 | 755391  | 1285557 | 544265  | 1368063 | 527575  | 819026  | 1102491 | 817124  | 824810  | 157066  | 663716  |
| 1076867 | 1069964 | 1167567 | 1195124 | 1111748 | 1417550 | 1009250 | 933274  | 1145664 | 1062177 | 1156649 | 1065354 | 1304899 | 1117736 | 1090527 |
| 156788  | 195192  | 106375  | 238104  | 115440  | 173667  | NA      | 162420  | NA      | 112023  | 150513  | 118645  | 109169  | NA      | NA      |
| 5240506 | 4316283 | 2233101 | 4051237 | 1199908 | 1763545 | 2708882 | 3304887 | 1823340 | 4689531 | 1893674 | 2766067 | 1693448 | 233550  | 545530  |
| 3806624 | 3207643 | 1631598 | 3041791 | 892832  | 1310460 | 2096733 | 2463536 | 1347349 | 3531882 | 1433498 | 2049820 | 1245124 | 172059  | 398784  |
| 255100  | 237512  | 254201  | 306784  | 276383  | 339233  | 220347  | 204963  | 272051  | 231609  | 285007  | 243559  | 347412  | 268379  | 241551  |
| 216267  | 76688   | 203530  | 157649  | 64482   | 98963   | 81172   | 153660  | 133245  | 165447  | 77049   | 126465  | 80457   | NA      | 196111  |
| 231924  | 81696   | 155446  | 135130  | NA      | 87346   | 77691   | 153441  | 133198  | 161226  | 74033   | 117106  | 70103   | NA      | 190674  |
| NA      | NA      | 149067  | NA      | 205830  | NA      | NA      | NA      | 202352  | NA      | 277975  | 148311  | NA      | 159171  | 155648  |
| 275416  | 343171  | 166266  | 227887  | 209530  | NA      | 180470  | 167482  | 201753  | 283600  | NA      | 198397  | 169551  | NA      | NA      |
| 838411  | 832428  | 916425  | 910614  | 919346  | 1121166 | 786497  | 723874  | 868762  | 823845  | 916516  | 798013  | 1045277 | 943838  | 849319  |
| 665308  | 103084  | 227981  | 449308  | 322946  | 390267  | 563969  | 586937  | 162387  | 316069  | 342384  | 205526  | 181230  | 153259  | 476440  |

|         |        |        |        |        |        |         |         |        |        |        |        |        |        |        |
|---------|--------|--------|--------|--------|--------|---------|---------|--------|--------|--------|--------|--------|--------|--------|
| 482189  | NA     | 165169 | 329280 | 231087 | 292259 | 388328  | 441971  | 120737 | 222029 | 247822 | 151077 | 130477 | 111036 | 365188 |
| 198319  | 169875 | 204734 | 211186 | 232646 | 278765 | 167843  | 164795  | 202669 | 184013 | 199531 | 180904 | 258152 | 195070 | 186632 |
| 1851076 | 604421 | 671597 | 901311 | 802050 | 916335 | 1489016 | 1230884 | 295147 | 982987 | 954771 | 637542 | 666830 | 152633 | 464731 |
| 1420080 | 473815 | 520874 | 697762 | 624882 | 723813 | 1178525 | 972986  | 228913 | 759514 | 736089 | 493113 | 530228 | 117986 | 347305 |
| 225771  | 88385  | 200590 | 134735 | 75672  | 116406 | 96161   | 161942  | 144597 | 156197 | 96346  | 121820 | 79037  | NA     | 176625 |
| 193394  | 79032  | 186027 | 130757 | NA     | 95328  | 86484   | 161550  | 111980 | 162194 | 83248  | 97074  | 79616  | NA     | 162336 |
| 690753  | 713933 | 754521 | 773553 | 800562 | 943008 | 674411  | 599788  | 761682 | 720158 | 765789 | 674275 | 895539 | 810756 | 720214 |
| 263744  | 163099 | 463098 | 282024 | 316853 | 189771 | NA      | 205866  | 512769 | 195385 | 423032 | 352169 | 170160 | 234772 | 337698 |
| 171897  | 155325 | 183045 | 189527 | 182688 | 246132 | 148343  | 140045  | 189105 | 161001 | 181099 | NA     | 238796 | 173734 | NA     |
| 416631  | 457884 | 482403 | 528734 | 469553 | 587217 | 396973  | 386444  | 475015 | 448331 | 453244 | 391894 | 561400 | 508997 | 445992 |
| 317574  | 299121 | 328698 | 322824 | 352207 | 406147 | 283655  | 262228  | 316951 | 341679 | 337308 | 334501 | 393833 | 352118 | 299509 |

| D120461  | D120462  | D120464  | D130276  | D130277  | D130280  | D130281  | D130282  | D130283  | D130284  | D130285  | D130286  | D130287  | D130288  | D130289  |
|----------|----------|----------|----------|----------|----------|----------|----------|----------|----------|----------|----------|----------|----------|----------|
| 2326127  | NA       | NA       | 483033   | 361456   | 425762   | NA       | 2039332  | NA       | 326562   | 349653   | 582491   | 788093   | 596311   | 1137215  |
| 859424   | 788040   | 890238   | 608293   | 1785400  | 734988   | 767454   | 855295   | 1170651  | 510323   | 1106181  | 553066   | 1119048  | 554704   | 559487   |
| 2097257  | 689898   | 2425352  | 2039118  | 2104853  | 2468484  | 2355956  | 2347704  | 2061292  | 2772422  | 2304901  | 2329589  | 2049905  | 2718749  | 2717418  |
| 477844   | 421300   | 542023   | 555798   | 445037   | 418324   | 709241   | 465154   | 426805   | 425750   | 628748   | 446998   | 414936   | 568129   | 411486   |
| 866979   | 794141   | 1005143  | 944696   | 896661   | 1224508  | 964560   | 961156   | 953557   | 1192255  | 867013   | 965209   | 881501   | 891967   | 861275   |
| 159872   | 152415   | 161966   | 214649   | 181326   | 213024   | 176522   | 195328   | 194243   | 209792   | 207558   | 167125   | 167159   | 194415   | 244361   |
| 5366974  | 4399712  | 5692320  | 3603133  | 4495277  | 5088449  | 4659994  | 4355515  | 3971970  | 3496317  | 5146835  | 3550382  | 3616428  | 5979595  | 4316541  |
| 20102277 | 11891606 | 22034133 | 31684745 | 36100907 | 26242327 | 18628778 | 32623727 | 17398713 | 27710505 | 33468831 | 43684027 | 24202684 | 27441082 | 31913002 |
| 625435   | 236336   | 657419   | 340045   | 440223   | 156482   | 396424   | 576546   | 404565   | 338933   | 331747   | 365245   | NA       | 205923   | 162238   |
| 2432502  | 2413022  | 1118932  | 2605201  | 4254433  | 3732709  | 1195120  | 3149712  | 3907424  | 3015445  | 3518222  | 4187322  | 2369075  | 2448247  | 3435655  |
| 41570709 | 15757535 | 25890404 | 30024633 | 35147791 | 35957816 | 29196143 | 32153335 | 23312607 | 23976442 | 35582859 | 29361155 | 28431684 | 21082748 | 26936628 |
| 545451   | 536132   | 1124418  | 781944   | 846306   | 617312   | 887198   | 534455   | 431605   | 600969   | 473123   | 728691   | 754949   | 854223   | 653174   |
| 2722490  | 3418258  | 2385742  | 2420540  | 2602060  | 2644133  | 2543358  | 2385023  | 1663046  | 2431789  | 2437569  | 2744722  | 1868070  | 2287701  | 2470478  |
| 6387381  | 1768123  | 5550642  | 4241211  | 5575416  | 4868373  | 4171734  | 4484418  | 2144234  | 3439972  | 4639094  | 2830853  | 4242727  | 6498123  | 4092348  |
| 126683   | 119591   | 164156   | 138749   | 305691   | 161880   | 125025   | 143788   | 142895   | 146692   | 180737   | 134330   | 119513   | 171727   | 131746   |

|          |          |          |          |          |          |          |          |          |          |          |          |          |          |          |
|----------|----------|----------|----------|----------|----------|----------|----------|----------|----------|----------|----------|----------|----------|----------|
| 384742   | 627157   | 725581   | 790752   | 471309   | 709319   | 641606   | 707886   | 711599   | 439411   | 389381   | 278741   | 449011   | 464820   | 860237   |
| 280585   | 626478   | 228544   | 334740   | 392302   | 279361   | 188274   | 276285   | 291436   | 238130   | 236495   | 270734   | 228296   | 218628   | 244308   |
| 2622576  | 1822872  | 1692708  | 2279453  | 1871694  | 2054295  | 1781927  | 2334981  | 2207899  | 2091625  | 1908477  | 1987345  | 1956832  | 1383471  | 2631299  |
| 921914   | 636223   | 1323273  | 641225   | NA       | 1336319  | 1425705  | 1259586  | 1097741  | 879775   | 898085   | 419155   | 962145   | 1026978  | 992976   |
| 155008   | NA       | 137007   | 90562    | NA       | 154834   | 151066   | NA       | 93273    | 124012   | 113528   | 91660    | 79499    | 122172   | 127379   |
| 907980   | 596574   | 1005854  | 807025   | 869311   | 1095710  | 817036   | 817787   | 899615   | 1004454  | 880100   | 883706   | 851923   | 880202   | 867292   |
| NA       | NA       | 104693   | NA       | 90356    | NA       | 85786    | 143897   | 106829   | NA       | 100599   | NA       | 76633    | 116690   | NA       |
| 3740163  | 2275418  | 8755448  | 8559174  | 10004128 | 4122496  | 6105700  | 4792084  | 5829406  | 4455126  | 6218505  | 6040180  | 8231841  | 2737584  | 3128846  |
| 23740035 | 7936252  | 14261093 | 21018556 | 21888561 | 23051798 | 14310283 | 18443105 | 10828699 | 13863530 | 19832641 | 15978307 | 15385773 | 11827615 | 16597764 |
| 34084903 | 14326551 | 24690141 | 29616987 | 34354816 | 31257512 | 24123443 | 27225954 | 19006475 | 23144560 | 29451743 | 24234338 | 23108026 | 20031329 | 25952553 |
| 439428   | 578356   | 423721   | 462505   | 338571   | 351922   | 565275   | 417706   | 336618   | 385651   | 466730   | 386486   | 327937   | 473738   | 368626   |
| 225909   | 276815   | 192434   | 223881   | 226803   | 213458   | 144210   | 131448   | 171229   | 118070   | 153040   | 176107   | 190311   | NA       | 163283   |
| 487317   | 243018   | 272473   | 580030   | 762654   | 945209   | 425683   | 842062   | 527065   | 798149   | 821590   | 605451   | 941269   | 365108   | 1123907  |
| 206768   | 160342   | NA       | 220930   | 179071   | 152952   | 142805   | 134509   | 149925   | 141181   | 239230   | 126451   | 321709   | 170930   | 207045   |
| 210057   | 138103   | 239714   | 380447   | 188408   | 312017   | 424575   | 474042   | 427305   | 156049   | 227704   | 156034   | 245311   | 241983   | 313804   |
| 214663   | 372599   | 111418   | 167154   | 191464   | 235322   | 107994   | 207144   | 124569   | 177065   | 225224   | 250929   | 166877   | 90001    | 183495   |
| 189832   | 84341    | 239913   | 127712   | 148336   | 168088   | 119079   | 171753   | 165604   | 161271   | 196043   | 134131   | 153092   | 106625   | 174270   |

|         |         |         |         |          |         |         |         |         |         |         |         |         |         |         |
|---------|---------|---------|---------|----------|---------|---------|---------|---------|---------|---------|---------|---------|---------|---------|
| NA      | NA      | 204640  | 169483  | 187205   | 196450  | 163274  | 197926  | 144784  | 210146  | 167357  | 118819  | 168706  | 219802  | 158841  |
| 96990   | 69828   | 92843   | 99342   | 109277   | 134455  | 79217   | 82485   | NA      | 102838  | 94451   | 121025  | 79098   | 79918   | NA      |
| 89206   | NA      | 97737   | 84621   | 79304    | 93546   | 79858   | 82268   | 74987   | NA      | 81724   | 83988   | 84581   | 79017   | 82966   |
| 1559179 | 1460986 | 1697964 | 1763124 | 1631984  | 1360987 | 2479770 | 1657696 | 1184822 | 1838944 | 1502718 | 1793143 | 1313023 | 2561086 | 2289431 |
| 1274303 | 1459635 | 1256610 | 1039729 | 1129692  | 973220  | 1540283 | 1021258 | 895773  | 887995  | 1100192 | 1052046 | 1177071 | 1409758 | 1230132 |
| 818363  | 914975  | 806859  | 673264  | 728789   | 612369  | 1013868 | 657314  | 578818  | 588389  | 684622  | 672102  | 757243  | 911399  | 749008  |
| 6202255 | 697895  | 1748925 | 630467  | 10079273 | 5873819 | 618138  | 1910563 | 4480846 | 1196284 | 2502292 | 648418  | 1846274 | 583965  | 750242  |
| 195280  | 89885   | 217046  | 179042  | 178109   | 230439  | 190793  | 167037  | 186431  | 175952  | 182088  | 179440  | 183297  | 201799  | 190311  |
| 1078502 | 860056  | 1202967 | 1069864 | 2751542  | 1164092 | 1002336 | 1200933 | 972585  | 1090408 | 1469637 | 1021094 | 1060208 | 1427484 | 963916  |
| 459175  | 190253  | 248110  | 238621  | 255214   | 389342  | 272912  | 284109  | 292371  | 227088  | 214598  | 186668  | 333043  | 233230  | 251827  |
| 3327223 | 2810749 | 3048707 | 3974521 | 4334441  | 3204945 | 2464726 | 2975314 | 3348846 | 3015753 | 3088756 | 3033774 | 3072342 | 2760198 | 2981089 |
| 1483353 | 762124  | 1085898 | 1154019 | 1386963  | 1171597 | 980918  | 1170099 | 1179448 | 853957  | 1161732 | 957171  | 1127674 | 518496  | 918732  |
| 376289  | 458113  | 531039  | 422681  | 913883   | 572241  | 756080  | 635022  | 387476  | 598798  | 809465  | 639923  | 418324  | 730468  | 856314  |
| 690224  | 297198  | 418324  | 452304  | 391146   | 577149  | 469137  | 652411  | 570847  | 346836  | 429205  | 291474  | 427510  | 357575  | 407133  |
| 2736541 | 2099112 | 2652292 | 2204114 | 2098407  | 1934675 | 2300241 | 2168272 | 2122447 | 1817887 | 2428986 | 2264502 | 2403519 | 2253155 | 2469892 |
| 6030258 | 3084045 | 5573954 | 6595907 | 6355552  | 6073724 | 4282621 | 4052578 | 4802272 | 3723404 | 4766624 | 4758685 | 5443259 | 4094070 | 4796512 |
| 866442  | 650349  | 849900  | 683116  | 662648   | 616277  | 692033  | 706448  | 642161  | 552851  | 788945  | 721791  | 758751  | 689651  | 770592  |

|          |          |          |          |          |          |          |          |          |          |          |          |          |          |          |
|----------|----------|----------|----------|----------|----------|----------|----------|----------|----------|----------|----------|----------|----------|----------|
| 301516   | 261834   | 327487   | 329772   | 272177   | 246921   | 439841   | 287177   | 245459   | 248365   | 376068   | 265669   | 265022   | 342518   | 257596   |
| 272595   | 130359   | 257319   | 288047   | 266451   | 264500   | 182959   | 188142   | 202439   | 160239   | 204171   | 209430   | 240286   | 170760   | 212836   |
| 160751   | 268174   | 219157   | 174126   | 251209   | 167757   | 314310   | 207612   | 153380   | 186045   | 214028   | 210109   | 189751   | 328752   | 248585   |
| 183981   | 174074   | 205130   | 198750   | 150102   | 291490   | NA       | 191263   | 203259   | 231903   | 251921   | 197934   | 244821   | 238522   | 240694   |
| 10883824 | 9417614  | 11587281 | 9551322  | 10221085 | 12193478 | 9990739  | 9219842  | 10732371 | 11848745 | 10737428 | 10689309 | 10120331 | 10750400 | 9987179  |
| 130211   | 195079   | NA       | NA       | 141552   | NA       | NA       | 111866   | 109325   | NA       | 121834   | 118427   | NA       | NA       | 124065   |
| 232090   | 174812   | 551163   | 417124   | 394561   | 494024   | 231471   | 363468   | 209777   | 335271   | 273055   | 284286   | 509183   | 285826   | 229247   |
| 3510586  | 3435206  | 3756612  | 3496499  | 4661194  | 4132295  | 3157266  | 3234343  | 2917719  | 2899437  | 3480113  | 2948144  | 3653557  | 3093338  | 3778691  |
| 635180   | 619930   | 728203   | 610992   | 2561278  | 555380   | 598111   | 721622   | 469668   | 545074   | 1019676  | 526219   | 645631   | 1054240  | 475084   |
| 115268   | NA       | 136064   | 90079    | 110208   | 127574   | 94486    | 111809   | 97366    | 123280   | 119973   | 103040   | 75464    | NA       | 148300   |
| 391018   | 611335   | 218770   | 282587   | 375699   | 415453   | 189738   | 354020   | 246385   | 309088   | 389932   | 453887   | 304425   | 167746   | 339045   |
| 33965104 | 18809841 | 34098455 | 32964899 | 35090958 | 33662418 | 31260760 | 29836993 | 23192217 | 31805140 | 34209820 | 36071882 | 26905326 | 29132749 | 32708644 |
| 5698969  | 5485338  | 5243380  | 3546017  | 4183911  | 4639037  | 5079464  | 6312145  | 5725179  | 5392129  | 5758062  | 4580257  | 4215584  | 3742492  | 5245711  |
| 697581   | 613325   | 795759   | 738383   | 759501   | 1014236  | 759505   | 734925   | 775240   | 968559   | 690016   | 808009   | 703566   | 754265   | 685510   |
| 581886   | 502473   | 636659   | 687676   | 429444   | 934554   | 587416   | 514105   | 492763   | 845536   | 572705   | 721031   | 470282   | 433825   | 445756   |
| NA       | 64624    | NA       | NA       |
| 542948   | 491107   | 457195   | 648971   | 139643   | 551309   | 446281   | 659292   | 462359   | 573561   | 457430   | 455986   | 643239   | 621303   | 551623   |

|          |         |         |          |          |          |         |          |         |          |          |          |          |         |          |
|----------|---------|---------|----------|----------|----------|---------|----------|---------|----------|----------|----------|----------|---------|----------|
| 281942   | 254394  | 324780  | 321946   | 154180   | 221454   | 272120  | 293015   | 216244  | 251769   | 424155   | 414057   | 275609   | 294225  | 250159   |
| 97111    | NA      | 115533  | 82781    | 107583   | 120385   | 90809   | 89894    | 97214   | 99615    | 103391   | 96805    | 121619   | 104377  | 96398    |
| NA       | 552436  | 133530  | 459128   | NA       | 295003   | 138181  | 240307   | NA      | 612972   | 250340   | 112283   | 195517   | 813187  | 371288   |
| 342099   | 598093  | 643455  | 1265116  | 299971   | 1224272  | 1249347 | 319731   | NA      | 2306063  | 347731   | 711350   | 397973   | 2425999 | 1370969  |
| 12760769 | 7691463 | 8172251 | 10289907 | 11045832 | 13609609 | 7253669 | 11597760 | 7954024 | 10239874 | 13614618 | 14660688 | 10540769 | 6332858 | 11194917 |
| NA       | NA      | 210800  | 111219   | 187309   | NA       | NA      | 115816   | 144047  | NA       | 178960   | 123261   | 173804   | NA      | NA       |
| 635101   | 611721  | 926241  | 426341   | NA       | 520527   | 673230  | 417552   | 485297  | 486370   | 180664   | 648719   | 479088   | 585584  | 987137   |
| 2074023  | 2506921 | 1819082 | 1532723  | 2123006  | 2273369  | 1392373 | 1581107  | 1293195 | 1611362  | 1989396  | 2008821  | 1574886  | 1541017 | 1684331  |
| 270807   | 313902  | 304959  | 248805   | 240206   | 282762   | 278650  | 242051   | 289989  | 268184   | 297091   | 284674   | 237922   | 315055  | 294950   |
| 199161   | 310821  | 309836  | 278953   | NA       | 117840   | 511541  | 129406   | NA      | 142784   | 367540   | NA       | 213230   | 226726  | 231318   |
| 203535   | 825963  | 2366525 | 1432023  | 592245   | 2766847  | 1741128 | 981277   | NA      | 3975281  | 1212567  | 1297106  | 285696   | 1791530 | 2266822  |
| 233554   | NA      | 160902  | 181060   | 96949    | 152755   | 148787  | 135115   | 146866  | 118651   | 181682   | 138034   | 112201   | 171116  | 170811   |
| 574827   | 638939  | 603222  | NA       | NA       | 425529   | 704169  | NA       | 410012  | NA       | 503267   | 474508   | 560515   | 690428  | 538792   |
| 560140   | 632962  | 552524  | NA       | NA       | 401260   | 709697  | NA       | NA      | 413617   | 480627   | 454786   | 556476   | 663705  | 519515   |
| 4285995  | 5754553 | 4011651 | 3460075  | 6308851  | 3556569  | 3840249 | 4017509  | 3115491 | 3006624  | 4544396  | 3488520  | 3344044  | 5485034 | 3782180  |
| 472518   | 240867  | 220055  | 437199   | NA       | 365046   | 168319  | 187803   | 269929  | 269330   | 258486   | 314644   | 285225   | 244270  | 339756   |
| 3995617  | 2172722 | 2699815 | 3330717  | 4365404  | 3331644  | 2970862 | 4624085  | 5970518 | 1904610  | 2905129  | 1864666  | 3316284  | 2079112 | 2488016  |

|          |          |          |          |          |          |          |          |          |          |          |          |          |          |          |
|----------|----------|----------|----------|----------|----------|----------|----------|----------|----------|----------|----------|----------|----------|----------|
| 23729083 | 11237742 | 20074748 | 16277376 | 21625654 | 25170344 | 15069781 | 16590423 | 13975066 | 17248168 | 23331415 | 20958939 | 18203015 | 16033774 | 17973327 |
| 913557   | 790954   | 810416   | 684978   | 638701   | 514601   | 748320   | 689035   | 597848   | 444246   | 774427   | 630387   | 743043   | 771223   | 784471   |
| 195862   | 69036    | 335695   | 316316   | 321385   | 408096   | 281317   | 355658   | 333562   | 418324   | 305367   | 332644   | 302972   | 289149   | 320930   |
| 563950   | 498906   | 508139   | 404473   | 381104   | 303720   | 464425   | 424214   | 362162   | 262216   | 461547   | 377609   | 433744   | 492044   | 472804   |
| 522016   | 236349   | 625480   | 474251   | 264633   | 578895   | 325941   | 504730   | 427431   | 605849   | 1004008  | 648252   | 571011   | 555648   | 538395   |
| 267608   | 239673   | 332509   | 243340   | 238926   | 280171   | 280197   | 323913   | 290247   | 224549   | 304520   | 192339   | 238137   | 204740   | 249595   |
| 170524   | 150191   | 130044   | 99246    | 139993   | 95044    | 125242   | 107585   | 176495   | 128524   | 109443   | 98105    | 142115   | 120449   | NA       |
| 139437   | 140713   | 78507    | 114034   | 109912   | 146784   | 119597   | 99039    | 144083   | 135317   | NA       | 159358   | NA       | 144338   | 124275   |
| 2584239  | 2229091  | 2460981  | 2207631  | 2161743  | 2061294  | 2365068  | 2034075  | 2094057  | 2180831  | 2276718  | 2453181  | 2448834  | 2444685  | 2310334  |
| 371108   | 170468   | 201082   | 457667   | 419081   | 324732   | 181511   | 225025   | 130327   | 250786   | 424169   | 280457   | 248221   | 197307   | 579398   |
| 762439   | 702770   | 772318   | 662281   | 651621   | 657051   | 717506   | 639351   | 659528   | 642125   | 725016   | 747198   | 774874   | 767564   | 727142   |
| 73152    | 162594   | 69469    | 71557    | 132565   | NA       | 77296    | 88454    | NA       | NA       | 82461    | NA       | 64344    | 110463   | NA       |
| 126966   | NA       | 151090   | 139759   | 125078   | 156770   | 104446   | 119229   | 133914   | 141079   | 136774   | 136313   | 135707   | 134631   | 125575   |
| 7873138  | 7339829  | 9135553  | 6853638  | 7394441  | 9472834  | 7193745  | 6995745  | 8036958  | 9054335  | 8041886  | 7917931  | 7545037  | 7990909  | 7711109  |
| 630775   | 357947   | 872168   | 459480   | 417569   | 554003   | 710544   | 494853   | 567657   | 421064   | 637995   | 417495   | 474423   | 694591   | 467536   |
| 167476   | 109553   | NA       | 142172   | 111426   | 139662   | 138390   | 139298   | 164434   | 181844   | 141135   | 137025   | 140605   | 119282   | 216622   |
| 218875   | NA       | 242375   | 720188   | 942495   | 359970   | NA       | 897204   | NA       | 433359   | 838218   | 1624705  | 420034   | 613024   | 797831   |



|        |         |        |        |         |        |        |        |        |        |        |        |        |         |        |
|--------|---------|--------|--------|---------|--------|--------|--------|--------|--------|--------|--------|--------|---------|--------|
| 265897 | NA      | NA     | 142702 | 86162   | 172322 | 130172 | 160188 | NA     | NA     | 179059 | 124032 | 122511 | NA      | 102433 |
| 81686  | NA      | 142563 | 144999 | 142678  | 177751 | 110721 | 151325 | 145157 | 184135 | 131115 | 145718 | 132771 | 132455  | 133882 |
| 825516 | 1038587 | 778193 | 729905 | 658661  | 911997 | 753457 | 652853 | 771281 | 942073 | 750452 | 826455 | 629154 | 783540  | 791733 |
| 116408 | 56731   | 103519 | 112246 | 83468   | 129013 | 106139 | 110418 | 114848 | 107213 | 101684 | 104193 | 87787  | 105977  | 121598 |
| 457259 | 454876  | 313499 | 311396 | 1327828 | 333251 | 226536 | 425597 | NA     | 226655 | 418324 | 249386 | 273339 | 580808  | 222422 |
| 545951 | 587547  | 716687 | 610023 | 585553  | 894778 | 609318 | 595524 | 653550 | 784578 | 579452 | 658075 | 540885 | 597145  | 570779 |
| NA     | 101455  | 169108 | 131171 | 174845  | NA     | NA     | 144374 | NA     | NA     | 131869 | NA     | 117720 | 174149  | 118623 |
| 151577 | 208634  | NA     | 208748 | 184368  | NA     | 174840 | 243784 | 195288 | 149443 | 122827 | 136498 | 173841 | 222316  | 178284 |
| 140850 | 110109  | 372039 | 177329 | NA      | 141737 | 147081 | 133363 | NA     | 169551 | 214153 | 229313 | 209350 | 193203  | 173921 |
| 311689 | 151750  | 169491 | 199117 | NA      | 146257 | 178399 | 166917 | 215041 | NA     | 202352 | 162421 | 224155 | NA      | 230235 |
| 214421 | 738406  | 444178 | 306927 | 1744878 | 613343 | 477389 | 428829 | 172362 | 389588 | 604222 | 233999 | 285402 | 1262952 | 396587 |
| 731631 | 413520  | 340567 | 636997 | 469999  | 479349 | 336020 | 674957 | 528288 | 437387 | 450071 | 471009 | 482257 | 187547  | 651030 |
| 489253 | 417074  | 389241 | 354527 | 430975  | 309888 | 393331 | 325552 | 326349 | 261841 | 352777 | 371408 | 385891 | 418324  | 431596 |
| 123774 | 102172  | 102915 | 95672  | 66247   | 79361  | 105052 | 90288  | 82074  | 68636  | 94090  | 101309 | 98020  | 107603  | 107448 |
| NA     | 191469  | 161133 | 771337 | NA      | NA     | 300994 | 362566 | NA     | 149797 | 381580 | 114138 | 212587 | 179878  | 393642 |
| 371308 | 124561  | 205639 | NA     | 184663  | 344111 | NA     | 192276 | 187481 | 135819 | 209213 | NA     | 284564 | 122568  | 129395 |
| 157653 | 123021  | 115873 | 112779 | 124574  | 137535 | 114915 | 114429 | NA     | 101539 | 109120 | 102372 | 94270  | 143820  | 129767 |

|         |         |         |         |         |         |         |         |         |         |         |         |         |         |         |
|---------|---------|---------|---------|---------|---------|---------|---------|---------|---------|---------|---------|---------|---------|---------|
| 867992  | 489328  | 937052  | 829032  | 825705  | 1061328 | 733636  | 776112  | 911249  | 882664  | 876083  | 819456  | 754092  | 813899  | 794711  |
| 693747  | 546877  | 598070  | 526656  | NA      | NA      | 585074  | 507480  | 514767  | NA      | 581474  | 550685  | 641015  | NA      | 623333  |
| 417017  | 317007  | 307493  | 401481  | 228792  | 329893  | 304858  | 389100  | 480395  | 498558  | 329478  | 274284  | 368201  | 319153  | 560958  |
| 143190  | 142760  | 276638  | 260005  | 488448  | 444535  | 544562  | 490065  | 227566  | 548676  | 307901  | 310289  | 145846  | 669276  | 376305  |
| 127529  | 111595  | 234299  | 293228  | 301538  | 345034  | 228914  | 316335  | 270036  | 334789  | 242710  | 293590  | 227678  | 228282  | 275155  |
| 317477  | 177353  | 172501  | 211565  | 1180360 | 583726  | 250062  | 315366  | 135240  | 258284  | 357311  | 147895  | 188798  | 423919  | 268362  |
| 236716  | 204072  | 230581  | 379027  | 510782  | 470440  | 332160  | 726744  | 335401  | 724725  | 373586  | 427593  | 412002  | 630133  | 434600  |
| 85537   | 146832  | 241687  | 115992  | 396792  | 187969  | 187606  | 130654  | NA      | 146596  | 146215  | 132693  | 152136  | 399054  | 148532  |
| 1276946 | 977667  | 1422574 | 1177702 | 1142245 | 1184381 | 1128910 | 1084576 | 1093169 | 1150901 | 1229606 | 1176718 | 1142076 | 1272705 | 1174879 |
| 358697  | 269881  | 370580  | 317071  | 317029  | 329666  | 353035  | 312688  | NA      | 329069  | 357075  | 327832  | NA      | 340747  | 347057  |
| 333509  | 306982  | NA      | 228941  | 372039  | 211355  | NA      | 195967  | 293768  | 236047  | 365549  | 472972  | 229582  | 427702  | 423380  |
| 247837  | 159028  | 250029  | 300270  | 295018  | 256799  | 244363  | 291843  | 237132  | 216986  | 225813  | 294829  | 296536  | 153032  | 240659  |
| 180261  | 91447   | NA      | 109483  | 544916  | 249086  | 102554  | 126436  | NA      | 111344  | 145519  | 76016   | 82712   | 189384  | 136255  |
| 4288006 | 3690663 | 4773888 | 3720206 | 4119275 | 5189534 | 4043211 | 3827643 | 4461028 | 4839995 | 4443129 | 4424696 | 4069294 | 4152225 | 4119701 |
| 170319  | 114044  | 148624  | 163132  | 155579  | 178755  | 151780  | 157239  | 172394  | 176805  | 154333  | 160018  | 145834  | 136013  | 145202  |
| 813733  | 1092625 | 767852  | 792864  | 2435573 | 1156091 | 765551  | 895125  | 692510  | 800630  | 1216516 | 605310  | 771378  | 1922094 | 886673  |
| 326077  | 300452  | 394669  | 341305  | 372267  | 501348  | 371756  | 401098  | 388167  | 471708  | 345940  | 381856  | 339499  | 357598  | 332385  |

|         |         |         |         |         |         |         |         |         |         |         |         |         |         |         |
|---------|---------|---------|---------|---------|---------|---------|---------|---------|---------|---------|---------|---------|---------|---------|
| 1493735 | 1503408 | 4508720 | 2409512 | 2756058 | 4160409 | 4556409 | 3619343 | 1861279 | 3533200 | 3713538 | 3899097 | 2740588 | 4207242 | 2723706 |
| 254847  | 660598  | 212102  | 225356  | 1455198 | 322514  | 164313  | 362383  | 241202  | 227933  | 297127  | 285719  | 155035  | 358449  | 174873  |
| 232706  | 78768   | 148683  | 204911  | 146882  | 231865  | 177829  | 195470  | 167248  | 178182  | 185777  | 220278  | 139232  | 156386  | 185800  |
| 1759446 | 1680492 | 1579460 | 851838  | 1074520 | 1249854 | 1468927 | 2115824 | 1898163 | 1674129 | 1927922 | 1335838 | 1145221 | 934815  | 1660750 |
| NA      | 361053  | NA      | NA      | 788670  | 111816  | NA      | 141090  | NA      | NA      | 116960  | 98991   | NA      | 136446  | NA      |
| 135203  | NA      | NA      | 131140  | 126139  | 137263  | NA      | 110771  | NA      | NA      | 125766  | 104188  | 81017   | NA      | 109342  |
| 169734  | 64520   | 117027  | 161205  | 147014  | 175923  | 133192  | 145856  | 118043  | 166192  | 142701  | 151223  | 105094  | 119099  | 156922  |
| 538225  | 404941  | 459356  | 495707  | 509073  | 343856  | 446662  | 453672  | 453264  | 401571  | 509148  | 456838  | 419407  | 416605  | 413329  |
| 1000418 | 600250  | 3412432 | 2732102 | 1295149 | 1733988 | 1330999 | 2104863 | 2060909 | 1744045 | 3068586 | 2764314 | 2581179 | 2385582 | 478942  |
| 251823  | 133348  | 135806  | 123710  | 184832  | 202803  | 117830  | 141220  | 135750  | 141387  | 128949  | 140040  | 163623  | 103447  | 299141  |
| 3116364 | 2139896 | 2863013 | 2567315 | 3317722 | 2351383 | 2484725 | 2522907 | 2323473 | 2326102 | 2953110 | 2620806 | 2600356 | 2796712 | 2796615 |
| 782596  | 583568  | 902957  | 719200  | 676127  | 782166  | 717984  | 702814  | 751202  | 790914  | 815207  | 765090  | 728671  | 724136  | 756418  |
| 365448  | 403057  | 452922  | 360148  | 322247  | 413126  | 402197  | 419054  | 345684  | 155762  | 350500  | 163417  | 305015  | 309515  | 381997  |
| 2645457 | 2397195 | 3069828 | 2446709 | 2748254 | 3325473 | 2711089 | 2417228 | 2887501 | 3129622 | 2637011 | 2951743 | 2593675 | 2586423 | 2556679 |
| 888769  | 342580  | 481886  | 475977  | 474702  | 585264  | 434345  | 505252  | 589214  | 530235  | 402265  | 509130  | 442715  | 387901  | 783499  |
| 1447745 | 1341627 | 1278966 | 1163570 | 1411376 | 1317830 | 1388129 | 1338214 | 1448784 | 1241377 | 1391542 | 1252777 | 1101024 | 1439312 | 1347946 |
| 227910  | 229393  | 255377  | 232367  | 231682  | 348440  | 263869  | 248600  | 246943  | 312553  | 224012  | 266672  | 228980  | 221214  | 239120  |

|         |         |         |         |         |         |         |         |         |         |         |         |         |         |         |
|---------|---------|---------|---------|---------|---------|---------|---------|---------|---------|---------|---------|---------|---------|---------|
| 138409  | NA      | 146234  | 203694  | 193993  | NA      | 271836  | 116567  | NA      | NA      | 147154  | 127946  | 173313  | NA      | 153243  |
| NA      | 260004  | 258070  | NA      | 279457  | 139279  | 209027  | 124894  | NA      | NA      | 329746  | NA      | 132229  | 370668  | NA      |
| 375623  | 1243475 | 335541  | 302983  | 964394  | 281059  | 334741  | 395967  | 247536  | 240798  | 467109  | 273502  | 274379  | 598587  | 266714  |
| 520051  | 231420  | 348262  | 294187  | 490748  | 497455  | 234906  | 316077  | 185867  | 276420  | 448895  | 444148  | 337929  | 269819  | 309678  |
| 447667  | 512526  | 526120  | 190267  | 577912  | 467335  | 676670  | 651145  | 332418  | 631835  | 416691  | 489287  | NA      | 706055  | 317313  |
| 503370  | 357337  | 558111  | 455082  | 445789  | NA      | 418324  | 428003  | 497922  | NA      | 503111  | 509870  | 458884  | 452348  | 442754  |
| 1808271 | 1526600 | 2054316 | 1642418 | 1772996 | 2183242 | 1706737 | 1560853 | 1909530 | 2137435 | 1833305 | 1930056 | 1697380 | 1726535 | 1677984 |
| 150432  | 187216  | 125208  | 106768  | 115263  | 96164   | 113089  | 113984  | 84114   | 75540   | 122228  | 88014   | 111050  | 154998  | 107385  |
| 143669  | 114782  | 177890  | 134651  | 157414  | 197693  | 156401  | 169835  | 178034  | 198584  | 153440  | 157589  | 143250  | 141814  | 131994  |
| 192235  | NA      | 257556  | 647016  | 451230  | 572760  | 301700  | 1390885 | NA      | 269411  | 215796  | 400779  | 590013  | 166976  | 1257832 |
| 201317  | 145808  | NA      | 161235  | NA      | NA      | NA      | NA      | 141620  | NA      | 142997  | 136546  | NA      | 158313  | 163036  |
| 199986  | 195235  | 206508  | 143897  | 169115  | 221284  | 182410  | 155566  | 196972  | 226044  | 209159  | 173184  | 186263  | 196974  | 177104  |
| 222138  | 191382  | 334865  | 580086  | 606361  | 319851  | 375227  | 542136  | 142995  | 237782  | 335242  | 430169  | 719474  | 142502  | 370228  |
| 1551463 | 1280910 | 1725348 | 1365225 | 1434677 | 1825175 | 1401039 | 1335904 | 1582786 | 1910939 | 1519341 | 1628647 | 1516640 | 1490764 | 1433588 |
| 174679  | 101217  | 221524  | 379820  | 330906  | NA      | 240838  | 241093  | NA      | 156532  | 309137  | 335222  | 344399  | 144870  | NA      |
| 313250  | 259817  | 222512  | NA      | 138708  | 160407  | 237921  | 436290  | 320594  | 242778  | 367250  | 194197  | 160746  | NA      | 271437  |
| 578185  | 444952  | NA      | 467573  | 370981  | 247360  | NA      | 213469  | 513532  | 296937  | 528680  | 598167  | 674366  | 355419  | 481748  |

|         |         |         |         |         |         |         |         |         |         |         |         |         |         |         |
|---------|---------|---------|---------|---------|---------|---------|---------|---------|---------|---------|---------|---------|---------|---------|
| 309006  | 249006  | NA      | 231507  | 181657  | NA      | NA      | NA      | 263929  | 137150  | 272960  | 317739  | 354386  | 187864  | 267704  |
| 218028  | 151677  | NA      | 344647  | 345571  | 201992  | 211256  | 400260  | 154022  | 162431  | 219362  | 319797  | 398227  | NA      | 215944  |
| 3867840 | 2723692 | 3796343 | 6459626 | 6147454 | 3998809 | 4014274 | 6821787 | 3175981 | 2851193 | 4630719 | 6155102 | 7942424 | 2313200 | 4130668 |
| 419635  | 342276  | 479565  | 346714  | 381150  | 473991  | 378385  | 353982  | 434542  | 465567  | 445992  | 437578  | 388806  | 411565  | 411045  |
| 162865  | NA      | NA      | 189351  | NA      | NA      | NA      | NA      | 109822  | NA      | 125985  | 125888  | 181445  | NA      | NA      |
| 896403  | 515075  | 1111518 | 1568498 | 1169207 | 434589  | 1091211 | 1174004 | 739885  | 836282  | 1483919 | 1580942 | 1363875 | 858815  | 470319  |
| 1477296 | 1191083 | 1640416 | 1280709 | 1466190 | 1804928 | 1370313 | 1293046 | 1471319 | 1715572 | 1401814 | 1484175 | 1371367 | 1450393 | 1385120 |
| 300897  | 259842  | 163043  | 124175  | 272042  | 195710  | 386298  | 443368  | 243556  | NA      | 328898  | 209706  | 236000  | 113639  | NA      |
| 475800  | 355939  | 572250  | 359828  | 437212  | 531229  | 413306  | 398750  | 449539  | 497580  | 432478  | 438278  | 446150  | 461513  | 434579  |
| 945498  | 683535  | NA      | 994629  | 432411  | 468322  | NA      | 418943  | 850777  | 559167  | 974221  | 1124576 | 1764358 | 499167  | 809495  |
| 604617  | 415276  | NA      | 640182  | 263596  | 279338  | NA      | 246138  | 541162  | 348173  | 607607  | 720527  | 1093355 | 295667  | 484907  |
| 347120  | 162207  | 188010  | 578907  | 2591818 | 370532  | 2117518 | 815340  | 503196  | 1167582 | 305824  | 290315  | 2262428 | 186102  | NA      |
| 826910  | 792228  | 1378984 | 956397  | 264419  | 519158  | 670482  | 612704  | 717204  | 900400  | 1224701 | 1226700 | 1169424 | 794455  | 1033539 |
| 537994  | 513242  | 882841  | 618496  | 163171  | 345624  | 424682  | 386829  | 469251  | 601062  | 793138  | 798105  | 759091  | 509782  | 651828  |
| NA      | NA      | NA      | 168839  | NA      | 129434  | 184624  | NA      | NA      |
| 1350362 | 1072230 | 1517526 | 1124318 | 1225988 | 1694331 | 1223804 | 1136228 | 1348377 | 1498960 | 1403953 | 1356069 | 1212597 | 1263441 | 1289252 |
| 306879  | 277859  | NA      | 449818  | 274610  | 211003  | NA      | 541105  | 359090  | 435925  | 796776  | 716373  | 366633  | 229168  | 228021  |

|         |         |         |         |         |         |         |         |         |         |         |         |         |         |         |
|---------|---------|---------|---------|---------|---------|---------|---------|---------|---------|---------|---------|---------|---------|---------|
| 189092  | 173509  | NA      | 286849  | 159788  | 127406  | NA      | 345637  | 228956  | 265474  | 541412  | 449831  | 231836  | 141896  | 139296  |
| 375606  | 260781  | 416221  | 309114  | 327181  | 447804  | 309937  | 291771  | 380685  | 420474  | 404864  | 385561  | 341817  | 386358  | 333219  |
| 320310  | 205500  | NA      | 483808  | 130021  | 147849  | NA      | 110702  | 269187  | 176230  | 319695  | 316086  | 644610  | 216183  | 274861  |
| 207264  | 131953  | NA      | 331051  | NA      | NA      | NA      | NA      | 176007  | NA      | 219801  | 204440  | 441176  | 137583  | 178601  |
| 777449  | 1002476 | 342965  | 475343  | 724287  | 268728  | 1529285 | 396235  | 800622  | 373943  | 1416961 | 985305  | 739396  | 795653  | 592719  |
| 554502  | 735473  | 241785  | 347377  | 509054  | 178306  | 1101304 | 284081  | 578879  | 266967  | 1022744 | 710584  | 512386  | 553649  | 410122  |
| 1223072 | 1000946 | 1346506 | 993211  | 1140724 | 1434389 | 1106040 | 1000847 | 1200482 | 1320712 | 1195783 | 1165923 | 1119834 | 1163239 | 1127367 |
| NA      | 110952  | NA      | NA      | NA      | NA      | 143835  | NA      | NA      | NA      | 142738  | 94811   | NA      | NA      | NA      |
| 1211874 | 734716  | NA      | 1299562 | 584980  | 661091  | NA      | 668239  | 1256919 | 902570  | 1429814 | 1936381 | 3686815 | 638885  | 901788  |
| 885026  | 552091  | NA      | 934194  | 443154  | 484450  | NA      | 490084  | 921462  | 647941  | 1043815 | 1445894 | 2796480 | 481703  | 670889  |
| 289881  | 227610  | 318562  | 238978  | 286298  | 328286  | 247682  | 234242  | 290079  | 272796  | 275410  | 283533  | 279836  | 287356  | 289652  |
| 107576  | NA      | 287248  | 224062  | 96644   | 149646  | 163800  | 150593  | 88723   | 89808   | 120870  | 126068  | 209480  | 101384  | 124859  |
| 101059  | NA      | 298615  | 199845  | 87624   | 134641  | 151298  | 137308  | NA      | 71149   | 133037  | 112794  | 207578  | 96953   | 122559  |
| 325888  | 214034  | 149931  | 132584  | 142907  | 167380  | 290505  | 161557  | 164303  | 214397  | 199564  | 146325  | NA      | 204729  | 111260  |
| 200622  | NA      | NA      | 199193  | NA      | NA      | NA      | NA      | 153764  | 138198  | NA      | 188283  | NA      | NA      | NA      |
| 955837  | 827567  | 1062328 | 769689  | 908754  | 1104866 | 820495  | 781624  | 965696  | 998026  | 916054  | 900766  | 858214  | 923044  | 898288  |
| 180234  | 124297  | 460932  | 149172  | 188097  | 151485  | 265307  | 150377  | 104786  | 182649  | 441294  | 341206  | 489348  | 353738  | 403798  |

|        |        |        |        |        |        |        |        |        |        |        |        |        |        |        |
|--------|--------|--------|--------|--------|--------|--------|--------|--------|--------|--------|--------|--------|--------|--------|
| 130366 | 96179  | 358015 | 104455 | 133723 | NA     | 195767 | 114103 | NA     | 129716 | 326253 | 233549 | 355127 | 266492 | 311460 |
| 223658 | 179310 | 269171 | 167718 | 203481 | 258469 | 195731 | 177228 | 233116 | 241681 | 217539 | 225373 | 208980 | 196502 | 201511 |
| 352420 | 175540 | 307730 | 390066 | 202676 | 175826 | 332823 | 181294 | 162013 | 235503 | 689791 | 529495 | 986347 | 344501 | 459515 |
| 257749 | 133212 | 230283 | 282538 | 157335 | 136531 | 256775 | 143725 | 125398 | 174371 | 555105 | 411349 | 753719 | 269820 | 358241 |
| 134276 | NA     | 302783 | 196592 | 104408 | 144890 | 143591 | 156145 | 108303 | 72551  | 125566 | 119864 | 187278 | 99172  | 132738 |
| 119091 | NA     | 258341 | 180975 | 100001 | 135599 | 166311 | 157794 | 76477  | 82402  | 117898 | 117391 | 184083 | 96829  | 116219 |
| 796963 | 740297 | 918560 | 661057 | 762992 | 986700 | 704303 | 681288 | 783423 | 884763 | 812498 | 829502 | 715878 | 794509 | 738690 |
| 598336 | 510734 | NA     | 257640 | 378906 | 353576 | 207748 | 437393 | 402029 | 462677 | 511236 | 489978 | 146866 | 381888 | 246413 |
| 203983 | NA     | 221133 | NA     | 165005 | 202137 | NA     | 154097 | 207637 | 191492 | 200145 | 215278 | 163070 | 180514 | 188689 |
| 505676 | 419577 | 554998 | 419527 | 450843 | 571111 | 423628 | 422652 | 516967 | 555845 | 495577 | 516852 | 440185 | 485152 | 484109 |
| 356542 | 295151 | 396942 | 289993 | 324602 | 425412 | 307865 | 280699 | 357259 | 366929 | 354298 | 362019 | 330177 | 347306 | 332424 |

| D130290  | D130291  | D130293  | D130294  | D130295  | D130296  | D130297  | D130298  | D130300  | D130301  | D130302  | D130303  | D130304  |
|----------|----------|----------|----------|----------|----------|----------|----------|----------|----------|----------|----------|----------|
| NA       | 1162615  | 368484   | NA       | NA       | 245874   | 1668506  | 461890   | NA       | NA       | NA       | NA       | NA       |
| 967871   | 453752   | 1715365  | 1521153  | 620270   | 1056352  | 739344   | 1497321  | 857327   | 891194   | 684851   | 696374   | 1080546  |
| 2247037  | 2433466  | 2366590  | 2141262  | 1642369  | 2159550  | 1412295  | 2272022  | 2375582  | 2108196  | 2176546  | 2813952  | 2112033  |
| 544799   | 832883   | 449187   | 463194   | 477466   | 598466   | 542941   | 661434   | 343791   | 697271   | 414924   | 571129   | 705959   |
| 917926   | 849346   | 914448   | 917262   | 1259526  | 959966   | 657738   | 873881   | 993389   | 746952   | 948797   | 1045866  | 914665   |
| 196680   | 165767   | 259441   | 228408   | 247237   | 222909   | 138833   | 206205   | 169603   | 241870   | 215286   | 234437   | 234085   |
| 4510635  | 4626282  | 6262070  | 6505725  | 4421650  | 8640870  | 6180664  | 5558487  | 5004007  | 5114731  | 3845495  | 4771720  | 4368360  |
| 33046706 | 17304391 | 32517866 | 28523045 | 22804988 | 30112082 | 22411551 | 30541783 | 23502455 | 36040215 | 27224792 | 35944148 | 27551358 |
| 453224   | 452787   | 276552   | 358081   | 672438   | 661945   | 828167   | 1318654  | 152254   | 721636   | 158945   | NA       | 346068   |
| 3513488  | 1105514  | 2361368  | 2770459  | 2785179  | 3477028  | 1670407  | 2205475  | 2183914  | 3173171  | 2288911  | 3250820  | 2547132  |
| 28572593 | 19800998 | 44312203 | 35396327 | 21046334 | 26188553 | 25207478 | 36053373 | 23329094 | 31047235 | 20551674 | 21778644 | 30797892 |
| 722065   | 684701   | 826300   | 501914   | 518065   | 698552   | 486347   | 577436   | 522698   | 695393   | 425347   | 461805   | 1114709  |
| 2367699  | 1799780  | 2638352  | 2431212  | 1461868  | 1996348  | 2323753  | 2289747  | 1887592  | 2696710  | 2128684  | 2410653  | 2500784  |
| 5553362  | 2572161  | 9141444  | 7668883  | 4640326  | 6119022  | 5197354  | 5441656  | 5213408  | 6440176  | 2966698  | 5319508  | 5871825  |
| 108163   | 106536   | 104980   | 111824   | 162488   | 116889   | 108427   | 143057   | 171706   | 107907   | 155385   | 129954   | 144766   |



|          |          |          |          |          |          |          |          |          |          |          |          |          |
|----------|----------|----------|----------|----------|----------|----------|----------|----------|----------|----------|----------|----------|
| 505990   | 619082   | 893964   | 1419862  | 1796814  | 2181380  | 1914833  | 1434158  | 465570   | 1121299  | 407298   | 1000053  | 215682   |
| 286868   | 177447   | 319919   | 285183   | 238170   | 232276   | 220502   | 261324   | 228730   | 218204   | 240602   | 248530   | 266654   |
| 2818321  | 2035118  | 2506283  | 2578190  | 1292737  | 2297786  | 1881668  | 2129650  | 2133056  | 2311652  | 2104438  | 1825273  | 2043108  |
| 3117762  | 1812196  | 1207075  | 1537410  | 1001324  | 2443720  | 1218576  | 1195145  | 1483728  | 759395   | 955973   | 655306   | 881203   |
| 154426   | 108082   | 97048    | 103469   | 157030   | 141470   | 83682    | 71550    | 129129   | 125713   | 134575   | 98023    | 117384   |
| 887497   | 818189   | 942366   | 1004219  | 1081032  | 879678   | 601764   | 811872   | 844021   | 725664   | 981448   | 988370   | 957949   |
| NA       | 151083   | 106932   | 127818   | NA       | NA       | 72745    | NA       | 104912   | NA       | NA       | 127074   | NA       |
| 4969254  | 3849494  | 6865042  | 4768173  | 1862254  | 2470765  | 3894516  | 5059536  | 5500970  | 2133601  | 3308538  | 3101178  | 6034475  |
| 13249218 | 9630607  | 22206657 | 17917252 | 9486394  | 10724792 | 13848714 | 22044617 | 12416561 | 19393160 | 9939590  | 12063732 | 16119847 |
| 24527229 | 18149848 | 34698192 | 31864177 | 17421549 | 20470842 | 23065868 | 32832705 | 20836901 | 28290521 | 17534990 | 19514960 | 26211729 |
| 467444   | 695000   | 345440   | 338367   | 374513   | 492813   | 436853   | 567900   | 287557   | 496284   | 332930   | 460853   | 566098   |
| 156394   | 122901   | 205998   | 149420   | NA       | 159242   | 126893   | 216828   | NA       | 163790   | NA       | 127673   | 185914   |
| 705536   | 468142   | 950774   | 814558   | 510147   | 651850   | 558331   | 588333   | 421225   | 934063   | 518435   | 572258   | 710402   |
| 148534   | NA       | 256696   | 344345   | 202667   | 225368   | 167189   | 247780   | 186305   | 157695   | 168487   | 254117   | 150800   |
| 691034   | 220273   | 212554   | 389153   | 229416   | 215365   | NA       | 313940   | 216606   | 270650   | 281911   | 204752   | 208798   |
| 209946   | 91788    | 166876   | 156698   | 108467   | 176179   | 140358   | 248086   | 127434   | 219944   | 103328   | 116719   | 174837   |
| 81877    | 134884   | 140874   | 224449   | 182846   | 182313   | 133725   | 176870   | 194773   | 162406   | 218965   | 220958   | 114459   |

|          |         |         |         |         |         |         |         |         |         |         |         |         |
|----------|---------|---------|---------|---------|---------|---------|---------|---------|---------|---------|---------|---------|
| NA       | 113110  | 217772  | 230826  | NA      | 147949  | NA      | 150251  | NA      | 197315  | 207019  | 215416  | NA      |
| 82918    | NA      | 117364  | 111596  | NA      | 112826  | 97346   | 97741   | 79031   | 120516  | NA      | 84774   | 99512   |
| 87603    | NA      | 104386  | 74592   | 106103  | NA      | 79738   | 68778   | NA      | 119737  | NA      | 72149   | 106292  |
| 2333893  | 2287139 | 2348151 | 1995460 | 1086367 | 1708031 | 1711739 | 1754716 | 2163549 | 2472681 | 1703922 | 2168759 | 1346124 |
| 1469269  | 1191229 | 1241906 | 1260842 | 973975  | 1626355 | 1170685 | 1157359 | 1106387 | 1495173 | 1295352 | 1305783 | 1363401 |
| 917305   | 775956  | 779918  | 816309  | NA      | 996301  | 712001  | 731578  | 707279  | 929901  | 811130  | 820804  | 892869  |
| 11481367 | 1280579 | 3311550 | 507060  | 6994016 | 5393476 | 833111  | 558867  | 1496725 | 487118  | NA      | 4754997 | 1704418 |
| 191082   | 179397  | 208579  | 206937  | 212139  | 187029  | 149858  | 182356  | 183298  | 187922  | 204248  | 206559  | 208610  |
| 907419   | 807138  | 916672  | 975520  | 1164976 | 1013374 | 836505  | 1015988 | 1297576 | 937910  | 1074431 | 1016752 | 1131581 |
| 178428   | 241177  | 377778  | 529189  | 429246  | 378730  | 443159  | 350333  | 260995  | 211953  | 189104  | 253044  | 165753  |
| 3368581  | 2179240 | 3726698 | 3263367 | 2875026 | 3147258 | 2588450 | 3054637 | 2789014 | 2901966 | 2986545 | 3023116 | 3215914 |
| 1223727  | 801735  | 1092385 | 1248634 | 1025431 | 969003  | 931584  | 1297285 | 759826  | 909462  | 686139  | 701736  | 1202880 |
| 761434   | 810738  | 1111710 | 1029187 | 366984  | 544975  | 1015029 | 693259  | 763193  | 695586  | 596311  | 692849  | 677347  |
| 597715   | 337546  | 459616  | 621393  | 414468  | 503927  | 382935  | 589312  | 523294  | 361484  | 283341  | 333685  | 359347  |
| 2133230  | 2363238 | 2731202 | 2692437 | 1320777 | 2211067 | 1989770 | 2228690 | 2198979 | 2638802 | 2541473 | 2376985 | 2376240 |
| 4511219  | 3455786 | 6456359 | 4547366 | 3449862 | 4677196 | 3642790 | 6005574 | 3616066 | 4363180 | 4157651 | 4017338 | 5255740 |
| 665440   | 754938  | 811714  | 874933  | 414439  | 710470  | 631191  | 685255  | 690590  | 874364  | 811517  | 727071  | 734383  |

|          |          |          |          |          |          |          |          |          |          |          |          |          |
|----------|----------|----------|----------|----------|----------|----------|----------|----------|----------|----------|----------|----------|
| 331443   | 506542   | 278249   | 278040   | 277469   | 355577   | 339697   | 391538   | 205940   | 417302   | 252388   | 343078   | 417674   |
| 192744   | 148456   | 274537   | 195084   | 150864   | 217447   | 165760   | 264841   | 152423   | 196931   | 172692   | 178398   | 234841   |
| 275375   | 280495   | 310320   | 202242   | 162404   | 236107   | 263574   | 216875   | 257283   | 279498   | 223434   | 255971   | 213882   |
| 167970   | 173440   | 243001   | 273135   | 272197   | 221404   | 186880   | 205594   | 226129   | 191598   | 270467   | 268925   | 230826   |
| 10409180 | 9711011  | 11200285 | 11833933 | 12856113 | 11043175 | 8278456  | 9750210  | 10336318 | 9750195  | 12001289 | 11733964 | 11420237 |
| 119668   | NA       | NA       | 153704   | NA       | 122780   | 106450   | 111635   | 122844   | 107878   | NA       | NA       | NA       |
| 478859   | 285064   | 234573   | 571653   | 229151   | 671436   | 265372   | 466717   | 392332   | 331422   | 483482   | 782493   | 290370   |
| 2956581  | 2666688  | 3999059  | 4343759  | 2916143  | 4042563  | 3308443  | 3263058  | 3889499  | 3378589  | 3156450  | 2621126  | 3087336  |
| 519575   | 408957   | 471071   | 581328   | 497826   | 567932   | 570148   | 535266   | 772475   | 546217   | 508335   | 505024   | 693111   |
| 69003    | 131559   | 119117   | 137124   | 100294   | 156171   | 98987    | 102471   | 80596    | 103141   | 147600   | 166481   | NA       |
| 347891   | 160707   | 289455   | 267384   | 191897   | 305825   | 272067   | 438683   | 234372   | 376183   | 203069   | 217818   | 305376   |
| 28903102 | 23764635 | 35219817 | 30773980 | 21755437 | 26650110 | 29288875 | 31244968 | 24229409 | 34763619 | 29348823 | 30721713 | 31538591 |
| 4228692  | 3758980  | 6904894  | 6279326  | 5792772  | 4426134  | 5459752  | 6340508  | 5645381  | 5063641  | 5223811  | 4900795  | 4527922  |
| 766802   | 646867   | 747648   | 746213   | 1000339  | 781639   | 543791   | 711672   | 837091   | 610710   | 841188   | 878851   | 793748   |
| 773769   | 293225   | 459751   | 351046   | 1169236  | 525265   | 429903   | 580402   | 509706   | 281391   | 324180   | 460816   | 621816   |
| NA       |
| 659000   | 289107   | 511292   | 438002   | 393241   | 1043713  | 459665   | 565513   | 467790   | 476138   | 298433   | 278192   | 663630   |

|          |         |          |         |         |          |         |          |         |          |         |         |          |
|----------|---------|----------|---------|---------|----------|---------|----------|---------|----------|---------|---------|----------|
| 276646   | 183107  | 251480   | 182141  | 270623  | 355789   | 452044  | 230429   | 203609  | 331776   | 288708  | 284699  | 522283   |
| 89180    | 94348   | 120416   | 129129  | 134160  | 101720   | NA      | 85690    | 87197   | NA       | 128236  | 115847  | 114066   |
| 2119999  | 723074  | 970701   | 305524  | 216965  | 387917   | NA      | 384592   | 473455  | 596350   | 566565  | 248529  | 103921   |
| 212207   | 1097099 | 1075316  | 796400  | 923414  | 361686   | 1068863 | 2902339  | 764462  | 1548136  | 496275  | 759289  | 238387   |
| 12319147 | 5481024 | 11301004 | 9401785 | 7218893 | 11261237 | 8796387 | 13164654 | 7678419 | 12996975 | 6989961 | 7568788 | 11196968 |
| 125836   | NA      | 188710   | 234354  | NA      | 174790   | 133741  | 342154   | 220969  | NA       | 189879  | NA      | 205214   |
| 208949   | 135677  | 469624   | 691786  | 465721  | 330727   | 361447  | 452150   | 480184  | 661069   | 704218  | 307948  | 505403   |
| 1660323  | 1250308 | 2558864  | 2275873 | 1441460 | 1785697  | 1559323 | 2228581  | 1046948 | 1951530  | 1345453 | 1745338 | 1909092  |
| 278379   | 274419  | 245390   | 272592  | 256362  | 289839   | 232548  | 226363   | 309823  | 282772   | 343488  | 270040  | 285019   |
| 124704   | 177302  | 201098   | 321526  | 187452  | 401863   | 217252  | NA       | 114259  | 296368   | 202784  | 591482  | 316181   |
| 355632   | 2018341 | 2357568  | 1704671 | 1749827 | 498020   | 1765687 | 5341392  | 2631287 | 3737540  | 463492  | 1416946 | 149258   |
| 274000   | 126177  | 138466   | 158932  | NA      | 189798   | 151773  | 160712   | 226025  | 161801   | 135716  | 140609  | 143542   |
| 652730   | 562742  | 563173   | 559630  | NA      | 752683   | 534764  | 538546   | 522944  | 698922   | 589725  | 615822  | NA       |
| 612374   | 542001  | 537110   | 549179  | NA      | 727383   | 489141  | 526588   | 497678  | 662985   | 582683  | 590980  | NA       |
| 3776069  | 3242122 | 3325325  | 3800288 | 2630241 | 4645106  | 4324597 | 3599894  | 4961517 | 4595579  | 3841988 | 3600831 | 4500551  |
| 360685   | 199306  | 161510   | 252637  | 249038  | 383885   | 270733  | 196648   | 213940  | 286095   | 326440  | 390679  | 523212   |
| 1677410  | 1834269 | 3061685  | 4178897 | 2246896 | 2059213  | 2111549 | 2948012  | 3508165 | 1830528  | 2405656 | 2580633 | 2053223  |

|          |          |          |          |          |          |          |          |          |          |          |          |          |
|----------|----------|----------|----------|----------|----------|----------|----------|----------|----------|----------|----------|----------|
| 17176223 | 13654443 | 28173763 | 23110660 | 15656572 | 19654619 | 15871942 | 22537868 | 10707447 | 21227213 | 15122599 | 18509859 | 19235622 |
| 747858   | 774684   | 808290   | 875005   | NA       | 766941   | 748765   | 655574   | 644343   | 889235   | 732018   | 708975   | 771446   |
| 252753   | 273519   | 316044   | 367259   | 362156   | 267445   | 165482   | 318545   | 245414   | 269080   | 335023   | 416621   | 353247   |
| 435865   | 503352   | 492662   | 540561   | NA       | 463768   | 462579   | 369147   | 415443   | 549738   | 456705   | 435575   | 468461   |
| 463451   | 310599   | 822686   | 682870   | 404177   | 504246   | 588023   | 669668   | 618025   | 596651   | 433527   | 526435   | 481537   |
| 226446   | 219702   | 328762   | 346191   | 250118   | 292729   | 254384   | 284307   | 297212   | 289635   | 285074   | 286258   | 227082   |
| 146692   | 100092   | NA       | 116870   | 116185   | 149430   | 92997    | 104268   | 129748   | 91245    | NA       | 130827   | NA       |
| 115558   | 109314   | 117019   | 123653   | 135383   | 128709   | 81674    | 138564   | 127415   | NA       | 125966   | 128980   | 121811   |
| 2232366  | 2202510  | 2433486  | 2530667  | 1416134  | 2493582  | 1768048  | 2397402  | 2121589  | 2447796  | 2586254  | 2569277  | 2313313  |
| 263717   | 144477   | 487835   | 556884   | 192211   | 253791   | 163653   | 363984   | 278759   | 232045   | 244012   | 215028   | 240218   |
| 756806   | 701812   | 745637   | 757933   | NA       | 765338   | 567236   | 723010   | 635456   | 690625   | 751488   | 794123   | 691713   |
| NA       | NA       | NA       | NA       | NA       | 78723    | 87104    | NA       | 98867    | 74400    | NA       | NA       | 84031    |
| 123951   | 117498   | 144992   | 141193   | 160981   | 130959   | 97121    | 109988   | 129025   | 114987   | 148654   | 145236   | 134906   |
| 7540197  | 7586841  | 8185275  | 8485870  | 9774566  | 8341170  | 6280474  | 7157392  | 7266079  | 7365542  | 8963038  | 8674755  | 8391779  |
| 532963   | 731083   | 666211   | 765825   | 523196   | 877042   | 638277   | 611343   | 502068   | 548027   | 563869   | 604587   | 535448   |
| 182813   | 150626   | 168630   | 169833   | NA       | 203080   | 154243   | 134107   | 160049   | 184497   | 148276   | 121496   | 160684   |
| 803442   | NA       | 802233   | 490977   | 243701   | 677961   | 422295   | 571900   | 368101   | 1061556  | 539145   | 982958   | 472805   |

|        |        |        |        |        |        |        |        |        |        |        |        |        |
|--------|--------|--------|--------|--------|--------|--------|--------|--------|--------|--------|--------|--------|
| 125389 | NA     | 278465 | 180774 | NA     | NA     | 151411 | 212407 | 88396  | 183953 | NA     | NA     | 116227 |
| 100529 | 115483 | 130806 | 163013 | 160720 | 114375 | 72157  | 132715 | 106168 | 117040 | 146770 | 193649 | 158186 |
| 757894 | 743306 | 776531 | 792026 | 890034 | 850992 | 702534 | 670133 | 780636 | 753518 | 842374 | 877060 | 868316 |
| 97682  | 93910  | 110737 | 117394 | 116968 | 103370 | 86764  | 107126 | 111420 | 111645 | 94650  | 110137 | 109647 |
| 303586 | NA     | 411823 | 473320 | 269272 | 345532 | 417159 | 409309 | 517713 | 352269 | 146645 | 350122 | 399649 |
| 687823 | 560954 | 617950 | 620982 | 844249 | 695267 | 430095 | 564878 | 651755 | 422885 | 665243 | 699065 | 637105 |
| NA     | NA     | 146621 | 129103 | NA     | 113071 | NA     | NA     | 130647 | 121817 | 134051 | 150021 | NA     |
| 155915 | 242051 | 293086 | 263602 | 102786 | 121079 | 168446 | 237140 | 190837 | 156994 | 207627 | 205992 | 134609 |
| 133345 | 105897 | 271719 | 267797 | 210759 | NA     | 160792 | 199389 | 162570 | 138382 | 136740 | 348323 | 196045 |
| 282555 | 185967 | 221025 | 321550 | NA     | 209017 | 162540 | 187388 | 135469 | 211093 | 164663 | NA     | 231943 |
| 399525 | 286023 | 849646 | 718982 | 404223 | 890478 | 577978 | 170104 | 828626 | 620569 | 407824 | 810895 | 577281 |
| 741545 | 479344 | 653148 | 721409 | NA     | 479961 | 390797 | 556587 | 489627 | 509833 | 476895 | 360480 | 356987 |
| 408078 | 358012 | 355607 | 433375 | 237708 | 399942 | 360166 | 385109 | 376362 | 492922 | 418324 | 399179 | 409478 |
| 107891 | 100416 | 97943  | 109555 | NA     | 106576 | 103117 | 97144  | 91306  | 131314 | 105248 | 97299  | 115733 |
| 582643 | 159777 | 318750 | 412851 | NA     | 246444 | 209648 | 427385 | 848100 | 411675 | 242239 | 317810 | 369460 |
| 305938 | NA     | 219289 | 351273 | 236165 | 313744 | 357459 | 535164 | 331554 | 236352 | NA     | 272425 | 169813 |
| 139620 | NA     | 170118 | 168708 | 127316 | 157906 | 127336 | 132247 | 152680 | 151636 | NA     | 135863 | 160860 |

|         |         |         |         |         |         |         |         |         |         |         |         |         |
|---------|---------|---------|---------|---------|---------|---------|---------|---------|---------|---------|---------|---------|
| 822215  | 778317  | 911272  | 893445  | 954587  | 894437  | 656852  | 760406  | 787259  | 829542  | 1037940 | 945950  | 818558  |
| NA      | 619881  | 634422  | 668600  | NA      | NA      | 503340  | 551785  | 519226  | 651494  | 604471  | NA      | 520110  |
| 496672  | 306139  | 506324  | 601317  | 296844  | 503660  | 284571  | 423578  | 351551  | 409068  | 356075  | 492807  | 352974  |
| 475761  | 543057  | 879716  | 319975  | 134847  | 276919  | 713861  | 158989  | 505457  | 594011  | 372729  | 630499  | 549384  |
| 196897  | 230405  | 273051  | 349552  | 287904  | 218867  | 138643  | 261372  | 209811  | 219175  | 281289  | 375861  | 274912  |
| 184631  | 110562  | 455948  | 413970  | 262079  | 190729  | 262699  | 290860  | 470935  | 154841  | NA      | 335339  | 309624  |
| 576305  | 465125  | 833008  | 230283  | 168777  | 449818  | 934239  | 215880  | 519504  | 632574  | 448765  | 499946  | 653872  |
| 144926  | 98523   | 322648  | 167663  | 134651  | 160192  | 147136  | 80744   | 241788  | 142099  | NA      | 112327  | 316232  |
| 1212439 | 1094227 | 1227920 | 1333335 | 871305  | 1246753 | 933365  | 1144800 | 1095082 | 1157853 | 1233169 | 1292890 | 1256069 |
| 329862  | 315255  | 359853  | 395144  | NA      | 365923  | 268085  | 331091  | NA      | 329529  | NA      | 365236  | 344602  |
| 149235  | NA      | 233094  | 208356  | 277160  | 226401  | 646181  | 245655  | NA      | 202442  | 282823  | 342217  | 364897  |
| 240828  | 196897  | 281816  | 275171  | 248456  | 236371  | 200237  | 312143  | 215950  | 215226  | 287922  | 415322  | 311218  |
| 90533   | NA      | 193490  | 183347  | 97632   | 82722   | 139823  | 145326  | 196012  | 90300   | NA      | 162774  | 126355  |
| 4321758 | 4004030 | 4536536 | 4651666 | 5415172 | 4527363 | 3168951 | 3960745 | 4049461 | 3933479 | 5038274 | 4853914 | 4367511 |
| 166140  | 148549  | 158012  | 150292  | 172028  | 153878  | 114063  | 165702  | 144364  | 131837  | 169969  | 166172  | 154663  |
| 970067  | 470795  | 1614800 | 1416699 | 941636  | 1217829 | 1253609 | 594053  | 1624121 | 790129  | 798410  | 1247924 | 1164124 |
| 371205  | 341518  | 357525  | 370626  | 502571  | 394672  | 231853  | 322819  | 356643  | 272067  | 399290  | 420034  | 393933  |

|         |         |         |         |         |         |         |         |         |         |         |         |         |
|---------|---------|---------|---------|---------|---------|---------|---------|---------|---------|---------|---------|---------|
| 3765212 | 4212908 | 8690915 | 2956188 | 1451851 | 2261945 | 6543678 | 1281636 | 3734443 | 5137656 | 3367997 | 4277533 | 4234279 |
| 128034  | 124573  | 120633  | 208467  | 165960  | 163303  | 220699  | 249340  | 406306  | 124328  | 209183  | 232945  | 255020  |
| 186792  | 134748  | 223786  | 188867  | 144962  | 180070  | 152717  | 215911  | 172133  | 197406  | 137911  | 154670  | 203341  |
| 1054700 | 927336  | 2459906 | 2133612 | 1679512 | 1250088 | 2157849 | 2444170 | 1861352 | 1722033 | 1519316 | 1392616 | 1201213 |
| NA      | NA      | NA      | NA      | NA      | NA      | 94729   | NA      | 151039  | NA      | NA      | 109309  | NA      |
| NA      | NA      | 120089  | 109104  | NA      | NA      | 80934   | 127335  | NA      | 120329  | NA      | NA      | 100018  |
| 134493  | 114606  | 150410  | 172584  | 112964  | 125931  | 118772  | 156505  | 120985  | 164660  | 94530   | 123827  | 161718  |
| 452728  | 439167  | 451857  | 474826  | 383558  | 442562  | 419492  | 447398  | 413269  | 510953  | 456286  | 445987  | 463197  |
| 882783  | 1337591 | 2788383 | 1170168 | 2721876 | 774907  | 1126394 | 3296579 | 322288  | 1325524 | 2221635 | 4482902 | 1196848 |
| 199647  | 117949  | NA      | 270055  | NA      | 188388  | 116264  | 109736  | 312341  | 150705  | 170457  | NA      | 151714  |
| 2750333 | 2487764 | 2606380 | 3268936 | 1772855 | 2731234 | 2152779 | 2537945 | 2866691 | 2641293 | 2798520 | 2414360 | 2602093 |
| 741599  | 698136  | 825159  | 825026  | 642026  | 779136  | 589689  | 699149  | 723348  | 707278  | 777909  | 792258  | 722620  |
| 382085  | 367522  | 245158  | 418324  | 193757  | 476652  | 260561  | 161724  | 448737  | 564149  | 338516  | 433041  | 229202  |
| 2788108 | 2537263 | 2856340 | 3041638 | 3548319 | 2894064 | 2080319 | 2628884 | 2694092 | 2448578 | 3094572 | 3052412 | 2704320 |
| 648398  | 587840  | 385799  | 549376  | 292761  | 462319  | 301655  | 405653  | 732418  | 387624  | 469860  | 385559  | 529669  |
| 1470674 | 1353075 | 1535496 | 1608484 | 960161  | 1694716 | 1215860 | 998966  | 1595893 | 1441291 | 1540342 | 1528675 | 1518639 |
| 249064  | 215927  | 244141  | 241152  | 359255  | 256927  | 168256  | 227347  | 275305  | 170479  | 290707  | 269813  | 237827  |



|         |         |         |         |         |         |         |         |         |         |         |         |         |
|---------|---------|---------|---------|---------|---------|---------|---------|---------|---------|---------|---------|---------|
| 179419  | 243884  | 158899  | 130296  | NA      | 193595  | 170873  | 201589  | NA      | 227435  | 171319  | 165415  | 173334  |
| NA      | NA      | 380765  | 166605  | 271583  | 205232  | 277611  | NA      | NA      | 195927  | 338996  | 235796  | 227292  |
| 270651  | 255005  | 244230  | 272165  | 199881  | 353889  | 443402  | 276770  | 507117  | 319654  | 276941  | 265615  | 385924  |
| 277802  | 193637  | 571806  | 480366  | 204199  | 350404  | 302356  | 534739  | NA      | 466997  | 163624  | 246999  | 300646  |
| 918746  | 899841  | 746629  | 326954  | NA      | 193903  | 540882  | 173827  | 592739  | 945368  | 638287  | 823945  | 745958  |
| 428828  | 440336  | 476631  | 553311  | 439882  | NA      | 334395  | 435469  | 454457  | 437633  | 553268  | 469916  | 466166  |
| 1772971 | 1669106 | 1869075 | 1989994 | 2420066 | 1899159 | 1369552 | 1696049 | 1743382 | 1592448 | 2124177 | 2043714 | 1779582 |
| 115704  | 97023   | 109904  | 119647  | NA      | 130567  | 130612  | 103390  | 121605  | 150307  | 115882  | 102200  | 143300  |
| 159038  | 127278  | 162842  | 156814  | 223250  | 155559  | NA      | 140489  | 172792  | NA      | 182549  | 169434  | 163839  |
| NA      | NA      | 153729  | 496442  | 706774  | 285023  | 269037  | 372383  | 247783  | 660757  | 646085  | 354749  | 509888  |
| NA      | NA      | NA      | NA      | 189516  | NA      | 177984  | 165378  | NA      | NA      | 119240  | 158428  | 219661  |
| 199000  | 175874  | 209843  | 251405  | 223831  | 187551  | 155011  | 158871  | 182739  | 196229  | 211294  | 213651  | 201367  |
| 153250  | 200883  | 410338  | 324993  | 218497  | 325769  | 557345  | 269411  | 282977  | 346872  | 421622  | 663710  | 332598  |
| 1532373 | 1392536 | 1592072 | 1676875 | 1980724 | 1598520 | 1157359 | 1402004 | 1492316 | 1310246 | 1874388 | 1767916 | 1564325 |
| NA      | 157945  | 328663  | 260004  | 187809  | 157694  | 401518  | 169470  | 153711  | 355685  | 185403  | 307691  | 295375  |
| NA      | 118847  | 502095  | 414770  | 257654  | 173407  | 440256  | 480732  | 340201  | 271564  | 234825  | 189924  | 158433  |
| NA      | NA      | 182662  | 258102  | 674985  | 392248  | 727075  | 507894  | 204486  | 176317  | 295901  | 293349  | 559358  |

|         |         |         |         |         |         |         |         |         |         |         |         |         |
|---------|---------|---------|---------|---------|---------|---------|---------|---------|---------|---------|---------|---------|
| NA      | NA      | NA      | 115547  | 342489  | 207645  | 378946  | 277494  | NA      | NA      | 155094  | 148258  | 301068  |
| 215586  | 182928  | 293960  | 277688  | 171782  | 230685  | 356170  | 323737  | 177136  | 281775  | 264927  | 480600  | 409454  |
| 3792960 | 2968632 | 5987316 | 5263439 | 3153346 | 4380758 | 6430855 | 6341120 | 3505799 | 5208877 | 4993840 | 9728533 | 7071880 |
| 396972  | 397620  | 433409  | 456775  | 486062  | 435459  | 310914  | 351210  | 369546  | 384309  | 479981  | 441894  | 423805  |
| NA      | NA      | NA      | NA      | 188361  | NA      | 117673  | 157555  | NA      | NA      | NA      | NA      | 181753  |
| 777085  | 1043605 | 1638858 | 1305252 | 772004  | 766042  | 1777990 | 1166321 | 653746  | 1937814 | 876797  | 1484358 | 2387579 |
| 1429477 | 1423597 | 1462044 | 1731512 | 1850716 | 1521486 | 1099752 | 1339490 | 1352640 | 1293138 | 1656995 | 1618997 | 1547072 |
| 157997  | 235670  | 323438  | 147474  | NA      | 133472  | 358843  | 163649  | NA      | 241250  | NA      | 234073  | 277422  |
| 456393  | 434901  | 453126  | 528145  | 555074  | 496344  | 345808  | 413135  | 437314  | 414537  | 528621  | 457641  | 464924  |
| 190558  | NA      | 233842  | 349846  | 1267466 | 936827  | 1146834 | 960535  | 381491  | 365683  | 559350  | 448214  | 1013917 |
| NA      | NA      | 135385  | 195978  | 807258  | 562046  | 713379  | 636334  | 218376  | 216566  | 351037  | 272081  | 598897  |
| 679087  | 172585  | 418324  | 1012728 | 1764514 | 1444344 | 1767363 | 3176478 | 495816  | 1504800 | 227096  | NA      | NA      |
| 1065409 | 636896  | 556452  | 571120  | 698686  | 1017465 | 683879  | 616401  | 800555  | 879286  | 939795  | 1044021 | 1002225 |
| 680089  | 402000  | 353879  | 365615  | 467090  | 654265  | 434840  | 401528  | 515867  | 559278  | 613415  | 694693  | 642895  |
| NA      | NA      | NA      | NA      | 169790  | NA      | NA      | 129838  | NA      | NA      | NA      | NA      | NA      |
| 1380043 | 1268791 | 1371142 | 1491547 | 1706637 | 1416809 | 1011481 | 1174417 | 1234700 | 1176940 | 1552880 | 1457032 | 1341177 |
| 186067  | 156973  | 136756  | 161293  | 455653  | 291801  | 294555  | 354984  | 182534  | 370012  | 157856  | 300986  | 418975  |

|         |         |         |         |         |         |         |         |         |         |         |         |         |
|---------|---------|---------|---------|---------|---------|---------|---------|---------|---------|---------|---------|---------|
| 123833  | NA      | NA      | NA      | 287110  | 175711  | 178166  | 227651  | NA      | 244543  | NA      | 191551  | 249798  |
| 353716  | 352888  | 383172  | 424065  | 454994  | 373817  | 281493  | 316192  | 317202  | 334112  | 411748  | 406894  | 367859  |
| NA      | NA      | NA      | NA      | 505976  | 377437  | 276435  | 400245  | 120796  | 113386  | 163658  | 155364  | 355284  |
| NA      | NA      | NA      | NA      | 345812  | 257307  | 178180  | 275220  | NA      | NA      | NA      | NA      | 233765  |
| 239521  | 427906  | 404638  | 632993  | 1126054 | 333587  | 575153  | 849760  | 391032  | 508811  | 482360  | 901191  | 896349  |
| 171068  | 306725  | 279887  | 447254  | 796856  | 234915  | 402687  | 610909  | 277541  | 368077  | 343590  | 655038  | 645332  |
| 1211368 | 1088368 | 1202772 | 1330694 | 1507274 | 1268102 | 880533  | 1042180 | 1140809 | 1048215 | 1379117 | 1281849 | 1224504 |
| NA      | NA      | NA      | NA      | 120786  | NA      | NA      | 83582   | NA      | NA      | NA      | NA      | NA      |
| 317885  | 177879  | 269457  | 281888  | 1883923 | 1225935 | 1726707 | 1117194 | 489494  | 514304  | 563574  | 331607  | 1149661 |
| 233430  | 125039  | 191681  | 206818  | 1385340 | 899201  | 1270256 | 817681  | 351726  | 376662  | 390552  | 234103  | 869247  |
| 274323  | 280580  | 287852  | 323510  | 339182  | 316116  | 203411  | 251560  | 260548  | 242863  | 301342  | 312622  | 295683  |
| 119281  | 164116  | 256848  | 195275  | 71553   | 90460   | NA      | 127996  | NA      | 108595  | 213784  | 220073  | 102676  |
| 102920  | 181424  | 245892  | 191240  | 71689   | 90861   | NA      | 86685   | 63870   | 129089  | 173459  | 177395  | 105769  |
| 191626  | 211240  | NA      | 138731  | 141367  | NA      | 138942  | 118889  | 186658  | 264452  | 228768  | 283216  | 387094  |
| NA      | NA      | NA      | NA      | NA      | NA      | 102039  | 150770  | NA      | NA      | NA      | NA      | 148212  |
| 896972  | 883283  | 935087  | 1044593 | 1143372 | 963464  | 677965  | 780699  | 876175  | 807211  | 1049107 | 980369  | 962086  |
| 225828  | NA      | 520341  | 244054  | 164572  | 349603  | 390103  | 179412  | 292441  | 181655  | 347956  | 247758  | 142719  |

|        |        |        |        |        |        |        |        |        |        |        |        |        |
|--------|--------|--------|--------|--------|--------|--------|--------|--------|--------|--------|--------|--------|
| 168825 | NA     | 378075 | 173238 | 114549 | 266726 | 294959 | 126326 | 214323 | 133598 | 244821 | 173315 | NA     |
| 223373 | 205473 | 235480 | 271184 | 273140 | 238429 | 151779 | 192043 | 209246 | 182725 | 248243 | 229505 | 270215 |
| 187727 | NA     | 218636 | 347763 | 460014 | 560139 | 337495 | 444898 | 327640 | 266359 | 459563 | 337110 | 262864 |
| 143443 | NA     | 166311 | 266095 | 347193 | 440047 | 254722 | 349499 | 249575 | 198738 | 343905 | 254337 | 200502 |
| 104010 | 158778 | 232328 | 195055 | 104808 | 92233  | 72164  | 132779 | NA     | 116695 | 180133 | 177724 | 100075 |
| 101039 | 161768 | 240761 | 189973 | 72051  | 80209  | 67341  | 127846 | NA     | 118234 | 176639 | 187502 | 105518 |
| 779934 | 752666 | 810726 | 931096 | 959718 | 835325 | 619284 | 689736 | 743634 | 669817 | 901282 | 822057 | 784752 |
| 233209 | 297208 | 253786 | 231344 | 369832 | 183386 | 404378 | 234144 | 398512 | 614448 | 321076 | 374243 | 707374 |
| 194259 | 177455 | 207708 | 199567 | 241594 | 208259 | 130855 | 166349 | 188811 | 184965 | 235755 | 220361 | 197351 |
| 491584 | 467591 | 516727 | 545381 | 639213 | 523273 | 355243 | 436503 | 473687 | 419349 | 564509 | 554556 | 476187 |
| 349529 | 324814 | 350344 | 402841 | 422216 | 339828 | 251890 | 288433 | 331572 | 300295 | 398980 | 357031 | 347902 |

Table S5. Annotated top 10% separated PoC and NeC secondary metabolites as indicated by peak ID for control individuals and T2D patients.

**PoC**

| Peak.ID | mz_mean  | Intensity_me | Detected | Adduct | Name                                             | Chem.Sum.Formula | Monoisotopic.Mass | RTdiff   |
|---------|----------|--------------|----------|--------|--------------------------------------------------|------------------|-------------------|----------|
| 4       | 104.0719 | 1027223      | [M+H]+   |        | 3-Aminoisobutyric acid                           | C4H9NO2          | 103.0633289       | -0.07296 |
| 5       | 104.1083 | 2157845      | [M]+     |        | Choline                                          | C5H14NO          | 104.107539        | -0.03055 |
| 20      | 114.0675 | 5456107      | [M+H]+   |        | Creatinine                                       | C4H7N3O          | 113.0589112       | -0.1028  |
| 21      | 116.0719 | 28718549     | [M+H]+   |        | Proline                                          | C5H9NO2          | 115.0633289       | -0.11049 |
| 24      | 118.0875 | 3160711      | [M+H]+   |        | Betaine                                          | C5H11NO2         | 117.0789789       | -0.07538 |
| 25      | 118.0875 | 28822251     | [M+H]+   |        | Valine                                           | C5H11NO2         | 117.0789789       | -0.07211 |
| 27      | 120.0668 | 641540       | [M+H]+   |        | Homoserine                                       | C4H9NO3          | 119.0582439       | -0.09145 |
| 27      | 120.0668 | 641540       | [M+H]+   |        | Allothreonine                                    | C4H9NO3          | 119.0582439       | -0.08745 |
| 27      | 120.0668 | 641540       | [M+H]+   |        | (S)-(+)-2-Amino-3-hydroxypropanoic acid (serine) | C4H9NO3          | 119.0582439       | -0.07345 |
| 37      | 130.0876 | 1072690      | [M+H]+   |        | Cycloleucine                                     | C6H11NO2         | 129.0789789       | 0.025011 |
| 46      | 132.0781 | 4350700      | [M+H]+   |        | Creatine                                         | C4H9N3O2         | 131.0694762       | -0.11692 |
| 47      | 132.1032 | 16129082     | [M+H]+   |        | L-Leucine                                        | C6H13NO2         | 131.0946289       | -0.11968 |
| 48      | 132.1032 | 25225486     | [M+H]+   |        | Norleucine                                       | C6H13NO2         | 131.0946289       | -0.11573 |
| 51      | 133.0984 | 576155       | [M+H]+   |        | L-Ornithine                                      | C5H12N2O2        | 132.089878        | -0.03606 |
| 53      | 136.0431 | 271928       | [M+H]+   |        | Homocysteine                                     | C4H9NO2S         | 135.0353996       | -0.16382 |
| 70      | 146.118  | 277046       | [M]+     |        | Acetylcholine                                    | C7H16NO2         | 146.118104        | -0.10756 |
| 72      | 147.0768 | 3197842      | [M+H]+   |        | L-Glutamine                                      | C5H10N2O3        | 146.0691426       | -0.08099 |
| 73      | 147.1131 | 984748       | [M+H]+   |        | Lysine                                           | C6H14N2O2        | 146.1055276       | -0.0427  |
| 74      | 148.0607 | 684341       | [M+H]+   |        | L-Glutamic acid                                  | C5H9NO4          | 147.0531589       | -0.08327 |
| 93      | 162.1129 | 3491532      | [M+H]+   |        | L-Carnitine                                      | C7H15NO3         | 161.105194        | -0.09606 |
| 104     | 175.1194 | 492347       | [M+H]+   |        | L-Arginine                                       | C6H14N4O2        | 174.111676        | -0.07692 |
| 106     | 176.1034 | 555526       | [M+H]+   |        | L-Citrulline                                     | C6H13N3O3        | 175.0956913       | -0.09617 |
| 197     | 302.3061 | 146142       | [M+H]+   |        | Dihydrosphingosine                               | C18H39NO2        | 301.2980794       | 0.379193 |
| 231     | 450.3228 | 410556       | [M+H]+   |        | Glycodeoxycholic acid                            | C26H43NO5        | 449.314124        | 0.258357 |

**NeC**

| Peak.ID | mz_mean  | Intensity_me | Detected     | Adduct | Name                            | Formula    | Monoisotopic.Mass | RTdiff   |
|---------|----------|--------------|--------------|--------|---------------------------------|------------|-------------------|----------|
| 33      | 133.0131 | 108548       | [M-H]-       |        | L-(-)-Malic acid                | C4H6O5     | 134.0215251       | -0.10766 |
| 45      | 145.0607 | 217457       | [M-H]-       |        | L-Glutamine                     | C5H10N2O3  | 146.0691426       | -0.06436 |
| 46      | 146.0447 | 135377       | [M-H]-       |        | L-Glutamic acid                 | C5H9NO4    | 147.0531589       | -0.07353 |
| 69      | 175.0601 | 167793       | [M-H]-       |        | D,L-threo-3-Isopropylmalic acid | C7H12O5    | 176.0684752       | -0.47405 |
| 96      | 209.0659 | 735455       | [M+HCOOH-H]- |        | Fucose                          | C6H12O5    | 164.0684752       | -0.13374 |
| 107     | 225.0608 | 774985       | [M+HCOOH-H]- |        | Galactose                       | C6H12O6    | 180.0633903       | -0.10857 |
| 107     | 225.0608 | 774985       | [M+HCOOH-H]- |        | Mannose                         | C6H12O6    | 180.0633903       | -0.09757 |
| 124     | 249.0876 | 290161       | [M+HCOOH-H]- |        | L-Tryptophan                    | C11H12N2O2 | 204.0898776       | -0.40915 |

| FC       |          |          |          |          |          |          |          |          |          |          |          |          |          |
|----------|----------|----------|----------|----------|----------|----------|----------|----------|----------|----------|----------|----------|----------|
| D120443  | D120461  | D120462  | D120464  | D130276  | D130277  | D130280  | D130281  | D130282  | D130283  | D130284  | D130285  | D130286  | D130287  |
| 1092769  | 810314   | 881525   | 789806   | 613453   | 1782096  | 596436   | 741830   | 888996   | 1146540  | 464486   | 1056566  | 536915   | 1138226  |
| 315227   | 557241   | 989189   | 1016873  | 962085   | 1067255  | 1078940  | 746450   | 944650   | 968870   | 848253   | 952553   | 992467   | 1403720  |
| 708864   | 938138   | 546373   | 886097   | 594449   | 521029   | 772061   | 923586   | 1825246  | 1504946  | 1388834  | 1049982  | 454256   | 736287   |
| 24784752 | 18953566 | 13302311 | 19548364 | 31953536 | 36034096 | 21295402 | 18006800 | 33909184 | 17040360 | 25221538 | 31967660 | 42408324 | 24617456 |
| 493226   | 557980   | 715207   | 507936   | 781074   | 529699   | 639134   | 790999   | 2041669  | 477742   | 532653   | 646795   | 477742   | 577683   |
| 361859   | 198625   | 95527    | 198775   | 403885   | 146649   | 148849   | 787210   | 90738    | 145949   | 156649   | 131714   | 161714   | 99714    |
| 554750   | 1128864  | 964928   | 1698965  | 958453   | 1025822  | 1113413  | 1304179  | 855829   | 884272   | 1025822  | 327779   | 1388407  | 782729   |
| 554750   | 1128864  | 964928   | 1698965  | 958453   | 1025822  | 1113413  | 1304179  | 855829   | 884272   | 1025822  | 327779   | 1388407  | 782729   |
| 554750   | 1128864  | 964928   | 1698965  | 958453   | 1025822  | 1113413  | 1304179  | 855829   | 884272   | 1025822  | 327779   | 1388407  | 782729   |
| 514628   | 971250   | 1079341  | 869233   | 711698   | 1173989  | 646665   | NA       | 1084410  | 1378104  | 1309217  | 1075131  | 800753   | 857803   |
| 3707239  | 2054795  | 2810343  | 3526438  | 2545351  | 7767707  | 8631784  | 9985614  | 3345367  | 5901843  | 4980904  | 5709340  | 4054965  | 5939588  |
| 12450817 | 17340882 | 13770091 | 22383450 | 8877732  | 12652235 | 21196862 | 21848052 | 18706318 | 13832491 | 19169810 | 10605665 | 12618303 | 18943092 |
| 22392542 | 26124888 | 28253672 | 32137178 | 16026114 | 21904736 | 29868236 | 34291236 | 25365178 | 23318010 | 28298726 | 18615008 | 21065708 | 28130750 |
| 233153   | 291280   | 686533   | 459470   | 271847   | 241734   | 584951   | 761243   | 767028   | 411470   | 875241   | 516209   | 726459   | 784739   |
| 221979   | 204996   | 313056   | 198054   | 154486   | 212671   | 383674   | 188059   | 253199   | 410399   | 492720   | 418504   | 142033   | 217491   |
| 222463   | 415591   | 393646   | 432936   | 212823   | 220120   | 240645   | 254742   | 315947   | 263800   | 295304   | 286349   | 206691   | 204973   |
| 3393033  | 2918840  | 3533319  | 3137094  | 3144189  | 2704769  | 4008238  | 4326419  | 2600783  | 2382434  | 3092549  | 3279871  | 2744877  | 2950217  |
| 776662   | 674377   | 1213648  | 1398589  | 852535   | 963393   | 1163809  | 1384396  | 950740   | 948167   | 1216204  | 1155155  | 777254   | 1109625  |
| 385840   | 645282   | 613491   | 354787   | 512459   | 471130   | 426267   | 912192   | 464368   | 730836   | 660043   | 379495   | 545014   | 773158   |
| 586084   | 752063   | 860871   | 548588   | 627011   | 946381   | 1426608  | 918577   | 3653793  | 688577   | 785414   | 1755939  | 2280653  | 1354323  |
| 312925   | 463353   | 487235   | 548635   | 562082   | 564835   | 693510   | 428649   | 758382   | 567803   | 534362   | 482614   | 769590   | 547018   |
| 433095   | 726091   | 818854   | 511922   | 549367   | 405617   | 654476   | 139385   | 447382   | 431381   | 685270   | 452836   | 522044   | 436913   |
| 145583   | 118064   | NA       | 160586   | 127573   | 131857   | 164516   | 155291   | 145058   | 146712   | 163435   | 168843   | 160924   | 147411   |
| NA       | 332606   | 349514   | 181250   | NA       | 228500   | 652505   | 450395   | 464789   | 291627   | 1445689  | NA       | 245212   | 206117   |

| D120443 | D120461 | D120462 | D120464 | D130276 | D130277 | D130280 | D130281 | D130282 | D130283 | D130284 | D130285 | D130286 | D130287 |
|---------|---------|---------|---------|---------|---------|---------|---------|---------|---------|---------|---------|---------|---------|
| NA      | NA      | 63975   | 59516   | 141885  | 242679  | NA      | 88820   | 91747   | NA      | NA      | 63758   | NA      | NA      |
| 240876  | 246223  | 524407  | 189937  | 337715  | 183061  | 238731  | 208107  | 253039  | 288085  | 230508  | 190986  | 274768  | 233711  |
| NA      | 67028   | 83921   | 84468   | 81817   | 74266   | 100947  | 155322  | 107456  | 97147   | 113194  | 116744  | 125809  | 77479   |
| 153065  | 182008  | 92250   | 134521  | 142924  | 263409  | 176592  | 194400  | 170696  | 127122  | 82304   | 179422  | 113698  | 144085  |
| 2649411 | 2293501 | 2699279 | 992700  | 2627302 | 246559  | 1029058 | 1155217 | 1273819 | 1826945 | 2744597 | 1360420 | 1065040 | 2409675 |
| 6182895 | 4981978 | 3436888 | 4090693 | 3021468 | 5339881 | 4859904 | 8395540 | 3975807 | 5367388 | 5395173 | 6101834 | 2736568 | 4340567 |
| 6182895 | 4981978 | 3436888 | 4090693 | 3021468 | 5339881 | 4859904 | 8395540 | 3975807 | 5367388 | 5395173 | 6101834 | 2736568 | 4340567 |
| 604512  | 436656  | 444357  | 377242  | 317658  | 667309  | 427620  | 476172  | 407929  | 293352  | 313485  | 468159  | 229323  | 340990  |

| D130288  | D130289  | D130290  | D130291  | D130300  | D130301  | D130302  | D130303  | D130304  |
|----------|----------|----------|----------|----------|----------|----------|----------|----------|
| 525569   | 528603   | 910207   | 461606   | 845987   | 865945   | 587599   | 628491   | 949746   |
| 991275   | 1078377  | 1052507  | 910708   | 1003263  | 1024534  | 1080412  | 911338   | 921857   |
| 521383   | 354977   | 460012   | 445715   | 546794   | 777883   | 468502   | 508812   | 749504   |
| 25999770 | 30151402 | 31077844 | 17603896 | 23191578 | 35019144 | 23358742 | 32440276 | 24216278 |
| 1200793  | 1493495  | 1177509  | 1135995  | 341553   | 726829   | 692774   | 432143   | 554269   |
| 96100    | 156649   | 129279   | 787211   | 113613   | 96106    | 149041   | 198775   | 403885   |
| 1203573  | 1874528  | 419899   | 243943   | 1070275  | 1291065  | 1170830  | 534972   | 991071   |
| 1203573  | 1874528  | 419899   | 243943   | 1070275  | 1291065  | 1170830  | 534972   | 991071   |
| 1203573  | 1874528  | 419899   | 243943   | 1070275  | 1291065  | 1170830  | 534972   | 991071   |
| 406914   | 978634   | 973037   | 938164   | 1461499  | 1205198  | 1464102  | 737880   | 820220   |
| 5863789  | 8372914  | 2593795  | 2956133  | 4670889  | 5102093  | 5428206  | 2073153  | 2838710  |
| 15511693 | 15649446 | 11206383 | 15681566 | 16609461 | 22230040 | 12252322 | 18843724 | 8528121  |
| 23526624 | 23504038 | 18979206 | 24519970 | 27664058 | 33108870 | 20561282 | 27489010 | 15044938 |
| 587770   | 957400   | 345931   | 1061867  | 669634   | 593282   | 415653   | 907600   | 444815   |
| 151477   | 249515   | 229273   | 296482   | NA       | 316581   | 213741   | 262982   | 241878   |
| 181217   | 338750   | 220980   | 237926   | 531503   | 353280   | 257543   | 205948   | 162250   |
| 2945179  | 3124994  | 2615222  | 2816533  | 3104458  | 3080330  | 2752122  | 2819749  | 2562441  |
| 929219   | 1146999  | 491263   | 868018   | 1117296  | 1308197  | 749775   | 883696   | 588704   |
| 621235   | 425493   | 692101   | 809045   | 1217376  | 699090   | 753098   | 675879   | 511632   |
| 1038300  | 691275   | 2705686  | 2166769  | 2412550  | 2238683  | 2231885  | 1845244  | 787289   |
| 699975   | 478341   | 411039   | 421150   | 515604   | 585284   | 502964   | 273419   | 278145   |
| 442670   | 654262   | 588670   | 521173   | 551299   | 570270   | 461602   | 462648   | 256054   |
| 155345   | 148333   | 128869   | 137187   | 136801   | 167096   | 142454   | 128102   | 145833   |
| 389075   | 600124   | 158206   | 1188400  | 322670   | 375515   | 244505   | 642037   | 554338   |

| D130288 | D130289 | D130290 | D130291 | D130300 | D130301 | D130302 | D130303 | D130304 |
|---------|---------|---------|---------|---------|---------|---------|---------|---------|
| 61394   | 69667   | 65923   | 78734   | 69371   | 87483   | 63556   | 83767   | NA      |
| 170387  | 240666  | 308086  | 175257  | 199850  | 185511  | 202488  | 257337  | 219287  |
| 78756   | 147974  | 150079  | 173928  | 102111  | 100973  | 108826  | 139447  | 106225  |
| 131714  | 93590   | 114846  | 96720   | 124233  | 181219  | 119378  | 114913  | 181652  |
| 2319656 | 1246007 | 1304161 | 1124648 | 2155026 | 3083271 | 1963875 | 2933927 | 2238803 |
| 3386645 | 3401352 | 5196939 | 3573403 | 5186707 | 3630174 | 4895889 | 4465380 | 3296407 |
| 3386645 | 3401352 | 5196939 | 3573403 | 5186707 | 3630174 | 4895889 | 4465380 | 3296407 |
| 888650  | 440258  | 386559  | 322595  | 659511  | 501623  | 385597  | 322616  | 522555  |

MC

| D120444  | D120445  | D120446  | D120447  | D130293  | D130294  | D130295  | D130296  | D130297  | D130298  |
|----------|----------|----------|----------|----------|----------|----------|----------|----------|----------|
| 1270893  | 930145   | 731616   | 1117489  | 1516221  | 1391286  | 524410   | 947111   | 886733   | 1509915  |
| 676982   | 881162   | 995955   | 494795   | 853357   | 821108   | 810252   | 892236   | 984934   | 908578   |
| 641081   | 969767   | 344257   | 933962   | 912449   | 185610   | 405494   | 578331   | 869472   | 875996   |
| 31787700 | 26897780 | 29342460 | 32210016 | 28742730 | 26087918 | 19280576 | 26998092 | 26879302 | 30798678 |
| 584231   | 666654   | 782312   | 1149264  | 678328   | 530180   | 858264   | 513600   | 540188   | 438554   |
| 504882   | 86915    | 149041   | 155288   | 425755   | 446768   | 399399   | 434288   | 324281   | 396795   |
| 1483149  | 1363399  | 1191610  | 915693   | 902306   | 1215007  | 981744   | 659876   | 871179   | 853880   |
| 1483149  | 1363399  | 1191610  | 915693   | 902306   | 1215007  | 981744   | 659876   | 871179   | 853880   |
| 1483149  | 1363399  | 1191610  | 915693   | 902306   | 1215007  | 981744   | 659876   | 871179   | 853880   |
| 1287442  | 1066480  | 1303954  | 1446483  | 2932011  | 1843562  | 1066941  | 1406155  | 846574   | 2191007  |
| 7373129  | 5801389  | 2210927  | 4847055  | 4673195  | 3916121  | 6068050  | 4361095  | 1574451  | 2215255  |
| 12496933 | 14859654 | 13299189 | 15882157 | 12459854 | 9797294  | 19628592 | 16387584 | 8020313  | 9615706  |
| 21070760 | 25997262 | 22125832 | 25166156 | 23065942 | 18463986 | 30669932 | 29143804 | 14729124 | 18353884 |
| 344505   | 525247   | 553460   | 411807   | 663501   | 476245   | 840395   | 745016   | 431306   | 584440   |
| 197968   | 252637   | 304663   | 254237   | 649863   | 224086   | 187878   | 355929   | 193961   | 193093   |
| 258732   | 369819   | 438301   | 340413   | 167798   | 245351   | 333920   | 484010   | 362908   | 339564   |
| 3724107  | 3576027  | 2974533  | 3393943  | 3167887  | 2216958  | 3294050  | 2984760  | 2430703  | 2821790  |
| 911066   | 1197152  | 1251186  | 930191   | 1150820  | 815611   | 965565   | 1142033  | 866955   | 868795   |
| 420764   | 399147   | 495525   | 525592   | 716069   | 824770   | 982647   | 941321   | 310268   | 488617   |
| 929760   | 2312802  | 1293299  | 974860   | 705395   | 2674890  | 2706527  | 881122   | 420889   | 509200   |
| 408938   | 682628   | 692640   | 543328   | 727669   | 298300   | 406377   | 321076   | 988536   | 470946   |
| 521033   | 719835   | 548194   | 347749   | 619738   | 294111   | 451934   | 400608   | 332467   | 935779   |
| 155871   | 141681   | 148893   | 158724   | 156242   | 151120   | 139668   | 137461   | 145442   | 137965   |
| NA       | 387262   | 226935   | 517150   | NA       | NA       | 135882   | 454059   | 597545   | 255548   |

| D120444 | D120445 | D120446 | D120447 | D130293 | D130294 | D130295 | D130296 | D130297 | D130298 |
|---------|---------|---------|---------|---------|---------|---------|---------|---------|---------|
| NA      | 75397   | 95440   | 93342   | 76361   | 77609   | NA      | 78692   | 63968   | NA      |
| 258443  | 276478  | 327908  | 315054  | 283962  | 238092  | 259694  | 252768  | 221996  | 231607  |
| 99848   | 76627   | 102084  | 96050   | 211262  | 185253  | 74506   | 78871   | 177867  | 126234  |
| 142742  | 202728  | 246699  | 170408  | 176875  | 198135  | 84231   | 123092  | 185837  | 167669  |
| 1920547 | 1541871 | 1604426 | 1866110 | 2087227 | 1533934 | 2354742 | 1117457 | 2003403 | 2224026 |
| 5886241 | 4590749 | 4144910 | 4346838 | 3551098 | 3298237 | 2939274 | 3475842 | 2223749 | 4164740 |
| 5886241 | 4590749 | 4144910 | 4346838 | 3551098 | 3298237 | 2939274 | 3475842 | 2223749 | 4164740 |
| 490863  | 461996  | 876768  | 753194  | 345930  | 308415  | 356485  | 709905  | 706430  | 290394  |



| FP       |          |          |          |          |          |          |          |          |          |          |          |          |          |          |          |
|----------|----------|----------|----------|----------|----------|----------|----------|----------|----------|----------|----------|----------|----------|----------|----------|
| D120230  | D120231  | D120232  | D120233  | D120254  | D120259  | D120260  | D120261  | D120262  | D120266  | D120267  | D120268  | D120346  | D120347  | D120348  | D120349  |
| 656846   | 904234   | 952019   | 1088593  | 372446   | 1130530  | 2039231  | 2004964  | 1321114  | 1866792  | 1415470  | 1132919  | 1277221  | 793472   | 1929074  | 1181363  |
| 2445246  | 1152170  | 1322269  | 1900518  | 1050559  | 2656754  | 1889314  | 1392818  | 3819839  | 1093274  | 1276337  | 2284693  | 2696118  | 1695946  | 1372862  | 1102869  |
| 588297   | 634903   | 666372   | 749948   | 263667   | 612617   | 829611   | 750014   | 511633   | 291543   | 777199   | 840599   | 792066   | 683319   | 1313194  | 928604   |
| 35502692 | 26276236 | 30390782 | 25722522 | NA       | 20439098 | 37320224 | 39829940 | 24145262 | 39315744 | 21539720 | 42526136 | 36011212 | 34177424 | 22101002 | 30115378 |
| 232339   | 234119   | 468201   | 234119   | 80845    | 234119   | 330004   | 234119   | 101277   | 281875   | 131000   | 268350   | 465554   | 246129   | 130224   | 161786   |
| 597406   | 468327   | 134260   | 497355   | 94054    | 268606   | 262476   | 124235   | 1210787  | 486972   | 112959   | 341817   | 472326   | 278633   | 139299   | 113455   |
| 742041   | 858813   | 243963   | 130366   | 150524   | 823871   | 421689   | 72976    | 346608   | 83006    | 358934   | 139966   | 162241   | 360407   | 421689   | 386103   |
| 742041   | 858813   | 243963   | 130366   | 150524   | 823871   | 421689   | 72976    | 346608   | 83006    | 358934   | 139966   | 162241   | 360407   | 421689   | 386103   |
| 742041   | 858813   | 243963   | 130366   | 150524   | 823871   | 421689   | 72976    | 346608   | 83006    | 358934   | 139966   | 162241   | 360407   | 421689   | 386103   |
| 1248587  | 958790   | 1053440  | 1629251  | 632483   | 1650566  | 1146378  | 559787   | 375488   | 952148   | 754631   | 1383271  | 687348   | 728931   | 464211   | 2375221  |
| 9886645  | 1506691  | 1102981  | 6214241  | 2160904  | 2133808  | 2436120  | 9224947  | 1573904  | 4103546  | 1515879  | 2609342  | 1420847  | 2258763  | 4621058  | 5900180  |
| 13401952 | 14348835 | 14752211 | 17812200 | 22237168 | 8165691  | 13325381 | 12181317 | 19393524 | 19689716 | 15353930 | 28069206 | 17327604 | 15764001 | 15276326 | 15333503 |
| 22878734 | 26540216 | 24071292 | 26498364 | 38171108 | 12078564 | 19051692 | 19298440 | 29297558 | 28376558 | 25015024 | 38646216 | 25202246 | 25411378 | 23196740 | 25734250 |
| 656575   | 720261   | 602645   | 777629   | 1614327  | 433349   | 477894   | 566236   | 518297   | 448492   | 592663   | 826548   | 367340   | 376976   | 398416   | 747652   |
| 206763   | 469774   | 365107   | 356671   | 295660   | 81567    | 206963   | 222374   | 261461   | 260317   | 340824   | 415214   | 420091   | 243668   | 276420   | 350826   |
| 232639   | 254975   | 272962   | 370917   | 420912   | 355446   | 293990   | 395679   | 332913   | 400880   | 234442   | 188272   | 198507   | 394510   | 139835   | 129798   |
| 2589825  | 3706157  | 2778363  | 2989694  | 2454995  | 1811680  | 3981959  | 2888526  | 5017331  | 3211488  | 3383338  | 4071226  | 3968695  | 2691449  | 3347219  | 3388109  |
| 1043326  | 908291   | 884920   | 880388   | 1107145  | 719303   | 831094   | 962316   | 603490   | 1249641  | 1133149  | 1445469  | 930883   | 879358   | 968194   | 1160278  |
| 742778   | 868404   | 773470   | 800647   | 3282049  | 228906   | 354402   | 247789   | 377001   | 765512   | 572803   | 693538   | 447764   | 549414   | 736935   | 776308   |
| 1846302  | 294467   | 671935   | 598884   | 693473   | 646051   | 616175   | 2556538  | 450686   | 578141   | 750056   | 459994   | 496115   | 973941   | 510852   | 656695   |
| 335237   | 368592   | 337425   | 439822   | 268438   | 819877   | 398296   | 551356   | 364797   | 469718   | 275860   | 722469   | 588549   | 707285   | 460942   | 301903   |
| 290350   | 572310   | 217902   | 947049   | 1454868  | 1590679  | 565317   | 1118714  | 336266   | 559130   | 220420   | 1137261  | 157533   | 991014   | 764558   | 329424   |
| 140386   | 135556   | 142859   | 142756   | 149296   | 164463   | 159024   | 142255   | 134925   | 139597   | 130215   | 146335   | 154818   | 137178   | 150266   | 143914   |
| 676981   | NA       | 450462   | 702329   | 224636   | NA       | NA       | NA       | 789025   | NA       | 212926   | 839251   | 149698   | 143669   | 384363   | 482897   |

| D120230 | D120231 | D120232 | D120233 | D120254 | D120259 | D120260 | D120261 | D120262 | D120266 | D120267 | D120268 | D120346 | D120347 | D120348 | D120349 |
|---------|---------|---------|---------|---------|---------|---------|---------|---------|---------|---------|---------|---------|---------|---------|---------|
| 67431   | 62081   | 190533  | 119849  | 77941   | NA      | 126062  | 98868   | 85231   | 88186   | 72322   | 54164   | 104346  | 102891  | NA      | 102572  |
| 234333  | 228465  | 169070  | 216571  | 181072  | 237120  | 131030  | 143781  | 140042  | 181939  | 234088  | 152912  | 203159  | 264896  | 133621  | 119152  |
| 131210  | 146399  | 109106  | 137666  | NA      | NA      | NA      | NA      | 79518   | 61872   | 79617   | NA      | 95994   | 138787  | NA      | NA      |
| 130895  | 123822  | 202945  | 155422  | 65867   | 100256  | 185386  | 262043  | 219923  | 196563  | 203744  | 211082  | 161731  | 139910  | 204297  | 202267  |
| 2746401 | 2827432 | 3250862 | 2578142 | 3244323 | 1886353 | 5003846 | 4287326 | 2085821 | 3692920 | 3143550 | 3010024 | 2318704 | 1910831 | 7436078 | 5192185 |
| 4029168 | 4239219 | 4439538 | 4829961 | 4041079 | 6437217 | 3559079 | 3489428 | 6297175 | 2886122 | 3712031 | 4175809 | 3051323 | 7169949 | 4957613 | 4483855 |
| 4029168 | 4239219 | 4439538 | 4829961 | 4041079 | 6437217 | 3559079 | 3489428 | 6297175 | 2886122 | 3712031 | 4175809 | 3051323 | 7169949 | 4957613 | 4483855 |
| 700514  | 833783  | 821533  | 746663  | 1391016 | 823649  | 2464791 | 2053617 | 941057  | 576447  | 627320  | 1974557 | 674467  | 473651  | 1060778 | 1814417 |

| D120359  | D120377  | D120378  | D120379  | D120394  | D120395  | D120401  | D120402  | D120405  | D120406  |
|----------|----------|----------|----------|----------|----------|----------|----------|----------|----------|
| 722856   | 307562   | 733125   | 693572   | 608877   | 1081660  | 1450107  | 515887   | 598660   | 874904   |
| 3293455  | 2582466  | 2895699  | 2710024  | 2609137  | 2387477  | 1294278  | 2448631  | 1623597  | 1997922  |
| 770517   | 1001324  | 1395930  | 681991   | 903136   | 703109   | 966835   | 793435   | 817408   | 829278   |
| 27019636 | 37159860 | 30617188 | 27644900 | 24374414 | 39017144 | 19776814 | 18895088 | 14642937 | 22709964 |
| 156956   | 266907   | 268929   | 436560   | 118372   | 186068   | 173918   | 68128    | 71916    | 63936    |
| 656536   | 504480   | 637372   | 504829   | 666236   | 438015   | 120012   | 371053   | 209192   | 278348   |
| 421689   | 74258    | 171422   | 74258    | 399479   | 171422   | 171422   | 152176   | 84771    | 92241    |
| 421689   | 74258    | 171422   | 74258    | 399479   | 171422   | 171422   | 152176   | 84771    | 92241    |
| 421689   | 74258    | 171422   | 74258    | 399479   | 171422   | 171422   | 152176   | 84771    | 92241    |
| 1259798  | 1110028  | 841987   | 500203   | 808733   | 1509023  | 2055691  | 580914   | 956194   | 896718   |
| 4482587  | 3993233  | 6538770  | 3690892  | 9204145  | 2194469  | 5458471  | 5626028  | 4334407  | 2811304  |
| 18455692 | 11901856 | 16140065 | 14236304 | 20194488 | 14886243 | 17881406 | 14183331 | 15542692 | 32093404 |
| 28324580 | 17582234 | 24418062 | 20679272 | 29838740 | 21740840 | 28546494 | 20023384 | 23244618 | 43996024 |
| 523750   | 244835   | 265139   | 266528   | 490465   | 435735   | 567984   | 392105   | 809879   | 725563   |
| 404516   | 218518   | 201175   | 395254   | 206506   | 740502   | 233545   | 199218   | 240266   | 226162   |
| 229621   | 143677   | 133443   | 128827   | NA       | 271502   | 233113   | 246590   | 410125   | 234433   |
| 4184952  | 3158738  | 3419476  | 3995722  | 4046368  | 4234853  | 3034514  | 3507516  | 3167317  | 3986118  |
| 936811   | 791602   | 649305   | 339337   | 1176807  | 907000   | 1196613  | 603397   | 1257418  | 1095361  |
| 440038   | 459917   | 836393   | 242065   | 959272   | 386985   | 541265   | 481620   | 465999   | 609065   |
| 998867   | 448859   | 683807   | 539768   | 762257   | 530742   | 436149   | 1911370  | 1257566  | 1660026  |
| 410705   | 546773   | 420432   | 432735   | 582178   | 696004   | 728282   | 257772   | 467188   | 468750   |
| 590014   | 732340   | 276114   | 817401   | 428741   | 744137   | 479521   | 133264   | 682656   | 627253   |
| 158691   | 130941   | 134141   | 163034   | 143686   | 167451   | 164173   | 132953   | 150090   | 138712   |
| NA       | 140449   | NA       | 262488   | 273618   | 336488   | 372262   | 315146   | 151454   | 253055   |

| D120359 | D120377 | D120378 | D120379 | D120394 | D120395 | D120401 | D120402 | D120405 | D120406 |
|---------|---------|---------|---------|---------|---------|---------|---------|---------|---------|
| 99729   | 132359  | 116167  | NA      | 64252   | 85429   | 63551   | 81514   | 57486   | 97244   |
| 157691  | 164275  | 149268  | 233397  | 200889  | 149204  | 113860  | 268858  | 140763  | 147755  |
| 72000   | NA      | 72546   | NA      | 85575   | NA      | 61113   | 95939   | NA      | NA      |
| 159427  | 193375  | 213165  | 164883  | 167106  | 165780  | 167231  | 113463  | 142288  | 172616  |
| 4238199 | 7839460 | 3594836 | 4585518 | 2135598 | 4767849 | 2753930 | 2148604 | 2808931 | 4540034 |
| 5886069 | 8200802 | 6116915 | 8346030 | 5733145 | 5318938 | 3987500 | 5676734 | 4783736 | 5929902 |
| 5886069 | 8200802 | 6116915 | 8346030 | 5733145 | 5318938 | 3987500 | 5676734 | 4783736 | 5929902 |
| 1422781 | 2159804 | 907059  | 1040903 | 1341140 | 1143972 | 1554198 | 607789  | 962537  | 773884  |

MP

| D120255  | D120263  | D120264  | D120265  | D120344  | D120345  | D120403  | D120404  |
|----------|----------|----------|----------|----------|----------|----------|----------|
| 1104776  | 1830608  | 1531996  | 1757801  | 1205453  | 1122507  | 866362   | 2476153  |
| 2324435  | 2500578  | 1655122  | 1378813  | 1095819  | 2803141  | 2892343  | 1384271  |
| 971140   | 2417820  | 934711   | 1329335  | 847229   | 923537   | 986275   | 1680888  |
| 21196844 | 30237984 | 26860414 | 58016852 | 29668138 | 24012586 | 21487460 | 36120536 |
| 67598    | 128244   | 67598    | 239037   | 196352   | 159067   | 196552   | 276803   |
| 503685   | 604107   | 199005   | 135608   | 423239   | 539590   | 656458   | 124142   |
| 198497   | 209589   | 62874    | 278231   | 84771    | 152232   | 278231   | 90151    |
| 198497   | 209589   | 62874    | 278231   | 84771    | 152232   | 278231   | 90151    |
| 198497   | 209589   | 62874    | 278231   | 84771    | 152232   | 278231   | 90151    |
| 1797416  | 828323   | 655309   | 1097640  | 821555   | 1367363  | 743342   | 297723   |
| 3975945  | 5169375  | 3180272  | 5520451  | 3709381  | 2008207  | 4485614  | 3140401  |
| 30601106 | 23366372 | 15845652 | 21385820 | 16258995 | 23966938 | 14568474 | 10553137 |
| 41406916 | 33082122 | 26241350 | 32948340 | 27835140 | 29740400 | 23340852 | 18472682 |
| 1606984  | 294626   | 482493   | 309181   | 656256   | 500136   | 408994   | 336617   |
| 228468   | 190786   | 238423   | 225127   | 358586   | 134358   | 160875   | 159252   |
| 312577   | 184963   | 237686   | 345578   | 293354   | 237460   | 197001   | 212217   |
| 3088688  | 3790682  | 2950803  | 2925705  | 3111947  | 3808214  | 3065257  | 2716734  |
| 1741432  | 1059779  | 1181140  | 1166580  | 1082453  | 1019454  | 609781   | 968405   |
| 2843571  | 624609   | 798145   | 1110586  | 618880   | 478298   | 887476   | 612913   |
| 2488104  | 799216   | 566625   | 942324   | 488620   | 416035   | 416382   | 531698   |
| NA       | 406240   | 351414   | 406193   | 358198   | 412721   | 340198   | 393456   |
| 324700   | 277384   | 357356   | 246594   | 875970   | 785484   | 651532   | 318940   |
| 170699   | 154406   | 144300   | 142565   | 127867   | 143308   | 142038   | 129892   |
| 739523   | 273896   | 571075   | 125832   | NA       | 222143   | NA       | NA       |

| D120255 | D120263 | D120264 | D120265 | D120344 | D120345 | D120403 | D120404 |
|---------|---------|---------|---------|---------|---------|---------|---------|
| NA      | 89120   | 53456   | 161979  | 162341  | 79794   | 70048   | 69722   |
| 251613  | 156339  | 201786  | 263149  | 156415  | 168444  | 218501  | 201349  |
| NA      | 99035   | 132013  | 76688   | NA      | NA      | NA      | NA      |
| 152293  | 273560  | 201471  | 212038  | 210453  | 176733  | 156188  | 244012  |
| 3417348 | 3012417 | 2914896 | 5374582 | 5749343 | 2346754 | 3721798 | 2232918 |
| 8396227 | 9369700 | 6237998 | 6094057 | 4939838 | 7645668 | 6593118 | 3563473 |
| 8396227 | 9369700 | 6237998 | 6094057 | 4939838 | 7645668 | 6593118 | 3563473 |
| 942269  | 943383  | 997733  | 897693  | 947054  | 1369470 | 707826  | 739150  |
